# Supplementary material
Source: PubMed Central journal article supplement (PMC6027584)

# Practical and Broadly Applicable Synthesis of Readily Differentiable Vicinal Diboronate Compounds by Catalytic Three-Component Reactions

Suttipol Radomkit, Zhenxing Liu, Anna Closs, Malte S. Mikus, and Amir H. Hoveyda\*

*Department of Chemistry, Merkert Chemistry Center, Boston College, Chestnut Hill, Massachusetts 02467*

## SUPPORTING INFORMATION

### *Table of Contents*

|                                                                                                              |                              |
|--------------------------------------------------------------------------------------------------------------|------------------------------|
| <b>1. General</b> .....                                                                                      | Error! Bookmark not defined. |
| <b>2. Reagents</b> .....                                                                                     | <b>2</b>                     |
| <b>3. Representative Procedure for the Phosphine–Copper Catalyzed Three-Component Reactions</b> .....        | Error! Bookmark not defined. |
| <b>4. Examination of Different Types of Chiral Cu Complexes on Catalytic Enantioselective Variants</b> ..... | <b>7</b>                     |
| <b>5. Results of Reactions Affording Vicinal Di–B(pin) Compounds</b> .....                                   | <b>9</b>                     |
| <b>6. X-ray Crystallography data</b> .....                                                                   | <b>15</b>                    |
| <b>7. NMR Spectra</b> .....                                                                                  | <b>75</b>                    |

## 1. Reagents

**Allylic phosphates:** prepared from the corresponding allylic alcohols based on an established method.<sup>1</sup>

**Bis(pinacolato)diboron [B<sub>2</sub>(pin)<sub>2</sub>]:** purchased from Frontier Scientific, Inc., recrystallized from pentane and dried under vacuum prior to use.

**Buffer solution pH 7.0 (20 °C):** purchased from Aldrich and used as received.

**Z-1-Bromo-2-fluoroethene:** purchased from Synquest and used as received.

**N-Bromosuccinimide:** purchased from Aldrich, recrystallized from water and dried under vacuum prior to use.

**tert-Butyldimethylsilyl chloride:** purchased from Oakwood and used as received.

**n-Butyllithium (1.6 M in hexanes):** purchased from Aldrich and used as received.

**Copper(I) chloride:** purchased from Strem and used as received.

**Z-1,2-Dichloroethene:** purchased from Aldrich and used as received.

**Diethyl allyl phosphate:** purchased from Aldrich and used as received.

**Furan:** purchased from Aldrich and purified by washing with aqueous 5% KOH, dried with Na<sub>2</sub>SO<sub>4</sub>, then distilled over KOH under reduced pressure prior to use.

**Isopropenylboronic acid pinacol ester (2):** purchased from Aldrich and used as received.

**Imidazole:** purchased from Aldrich and used as received.

**Imidazolium salt imid-1:** purchased from Aldrich and used as received.

**Lithium tert-butoxide:** purchased from Strem and used as received.

**Mo-1:** prepared according to a previously reported procedure.<sup>2</sup>

**Pinacol:** purchased from Aldrich and used as received.

**Phosphine ligands (PPh<sub>3</sub>, P(*n*-Bu)<sub>3</sub>, PCy<sub>3</sub>, rac-binap, and phos-1–6):** purchased from Strem and used as received.

**Potassium tert-butoxide:** purchased from Strem and used as received.

**trans-1-Propenylboronic acid pinacol ester (4):** purchased from Aldrich and used as received.

**Sodium tert-butoxide:** purchased from Strem and used as received.

**Sodium perborate tetrahydrate (NaBO<sub>3</sub>•4H<sub>2</sub>O):** purchased from Aldrich and used as received.

**2-(4,4,5,5-Tetramethyl-1,3,2-dioxaborolan-2-yl)-2,3-dihydro-1H-naphtho[1,8-de][1,3,2]diazaborinine [(dan)B–B(pin)]:** purchased from AKSci and used as received.

**Vinylboronic acid pinacol ester [vinyl–B(pin)]:** purchased from Combi-Blocks and distilled over CaH<sub>2</sub> prior to used.

(1) Kacprzynski, M. A.; May, T. L.; Kazane, S. A.; Hoveyda, A. H. *Angew. Chem., Int. Ed.* **2007**, *46*, 4554–4558.

(2) Koh, M. J.; Nguyen, T. T.; Zhang, H.; Schrock, R. R.; Hoveyda, A. H. *Nature* **2016**, *531*, 459–465.

**Vinyl-B(dan)**: prepared from vinyl-B(pin) according to a previously reported procedure.<sup>3</sup>

**2-(2-(4,4,5,5-Tetramethyl-1,3,2-dioxaborolan-2-yl)pent-4-en-1-yl)-2,3-dihydro-1H-naphtho[1,8-de][1,3,2]diazaborinine (1a)**: Enantiomeric purity was determined by HPLC analysis in comparison with authentic racemic material (96:4 er. shown; Chiralcel OJ-H column, 98% hexanes, 0.3 mL/min, 220 nm).

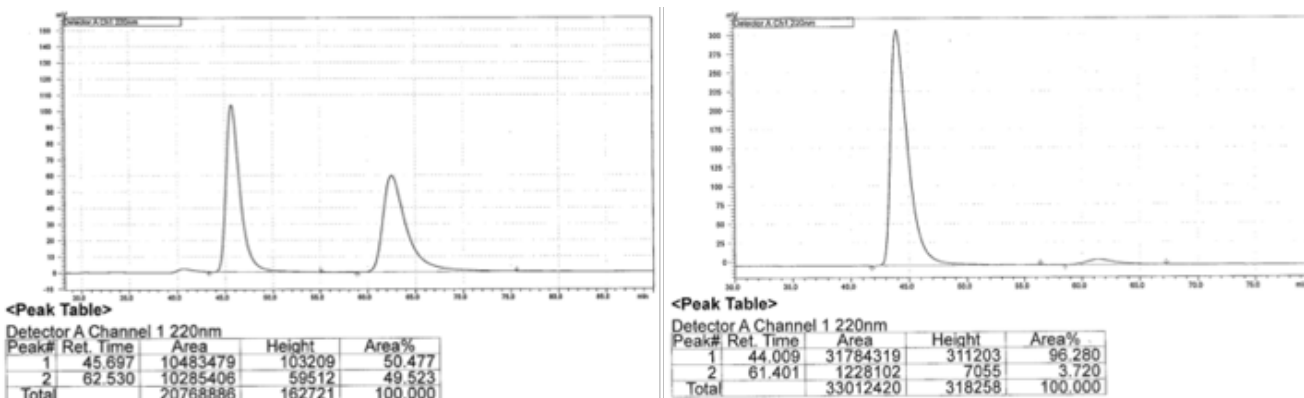

| Peak # | Time (min) | Area (%) | Peak # | Time (min) | Area (%) |
|--------|------------|----------|--------|------------|----------|
| 1      | 45.697     | 50.477   | 1      | 44.009     | 96.280   |
| 2      | 62.530     | 49.523   | 2      | 61.401     | 3.720    |

**2-(4-Methyl-2-(4,4,5,5-tetramethyl-1,3,2-dioxaborolan-2-yl)pent-4-en-1-yl)-2,3-dihydro-1H-naphtho[1,8-de][1,3,2]diazaborinine (1b)**: Enantiomeric purity was determined by HPLC analysis in comparison with authentic racemic material (94:6 er. shown; Chiralcel OJ-H column, 98% hexanes, 0.3 mL/min, 220 nm).

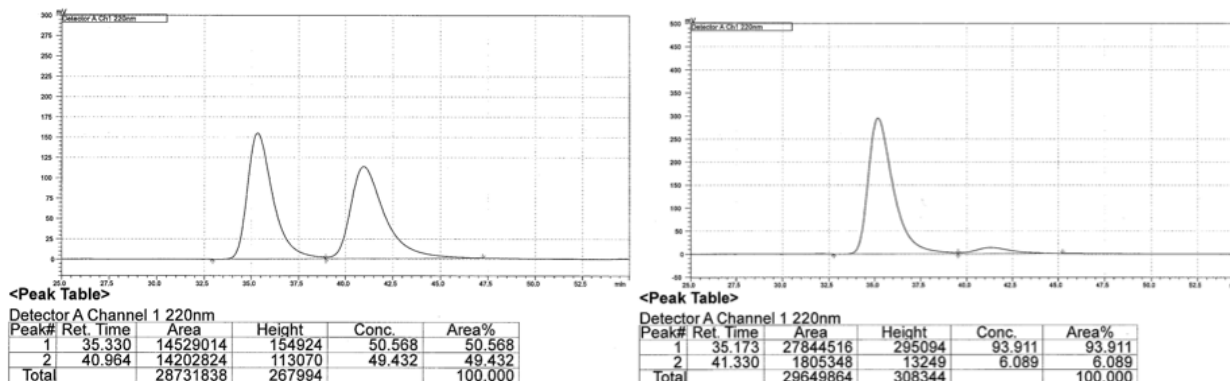

| Peak # | Time (min) | Area (%) | Peak # | Time (min) | Area (%) |
|--------|------------|----------|--------|------------|----------|
| 1      | 35.330     | 50.568   | 1      | 35.173     | 93.911   |
| 2      | 40.946     | 49.432   | 2      | 41.330     | 6.089    |

**2-(4-(((tert-Butyldimethylsilyl)oxy)methyl)-2-(4,4,5,5-tetramethyl-1,3,2-dioxaborolan-2-yl)pent-4-en-1-yl)-2,3-dihydro-1H-naphtho[1,8-de][1,3,2]diazaborinine (1c)**: Enantiomeric

(3) Iannazzo, L.; Vollhardt, K. P. C.; Malacria, M.; Aubert, C.; Gandon, V. *Eur. J. Org. Chem.* **2011**, 3238–3292.

purity was determined by HPLC analysis in comparison with authentic racemic material (94:6 er. shown; Chiralpak AD–H column, 99% hexanes, 0.3 mL/min, 220 nm)

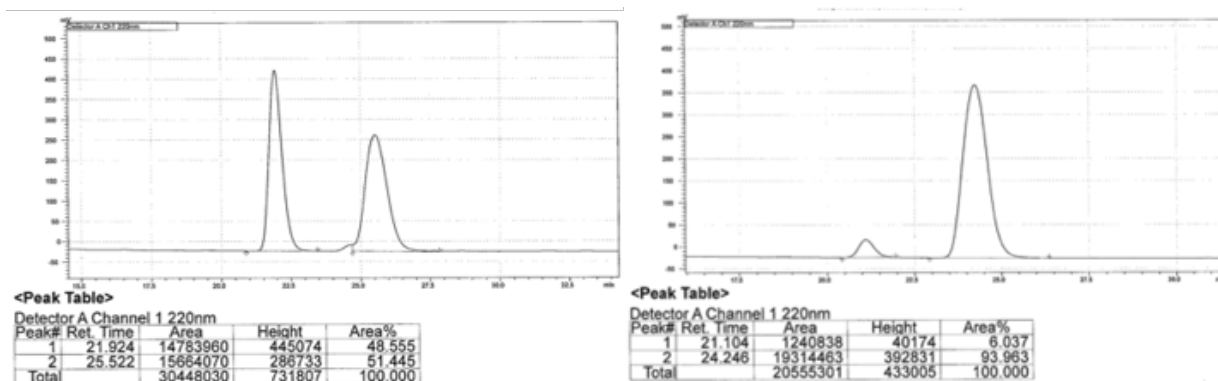

| Peak # | Time (min) | Area (%) | Peak # | Time (min) | Area (%) |
|--------|------------|----------|--------|------------|----------|
| 1      | 21.924     | 48.555   | 1      | 21.104     | 6.037    |
| 2      | 25.522     | 51.445   | 2      | 24.246     | 93.963   |

**2-(4-Phenyl-2-(4,4,5,5-tetramethyl-1,3,2-dioxaborolan-2-yl)pent-4-en-1-yl)-2,3-dihydro-1H-naphtho[1,8-*de*][1,3,2]diazaborinine (1d)**: Enantiomeric purity was determined by HPLC analysis in comparison with authentic racemic material (95:5 er. shown; Chiralcel AZ–H column, 98% hexanes, 0.3 mL/min, 220 nm).

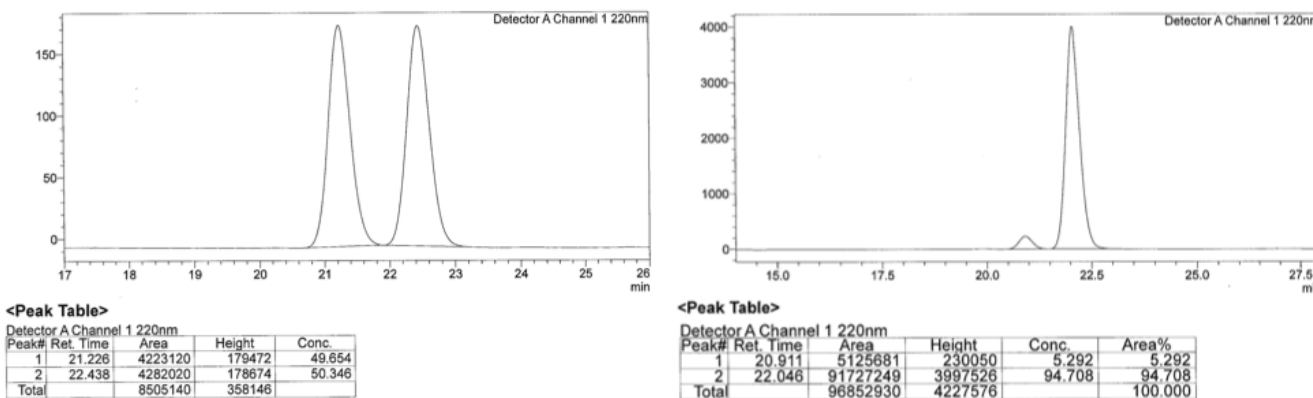

| Peak # | Time (min) | Area (%) | Peak # | Time (min) | Area (%) |
|--------|------------|----------|--------|------------|----------|
| 1      | 21.226     | 49.654   | 1      | 20.911     | 5.292    |
| 2      | 22.438     | 50.346   | 2      | 22.046     | 94.708   |

**2-(2-Methyl-2-(4,4,5,5-tetramethyl-1,3,2-dioxaborolan-2-yl)pent-4-en-1-yl)-2,3-dihydro-1H-naphtho[1,8-*de*][1,3,2]diazaborinine (3)**: Enantiomeric purity was determined by HPLC analysis in comparison with authentic racemic material (87:13 er. shown; Chiralcel OD–H column, 99% hexanes, 0.3 mL/min, 220 nm).

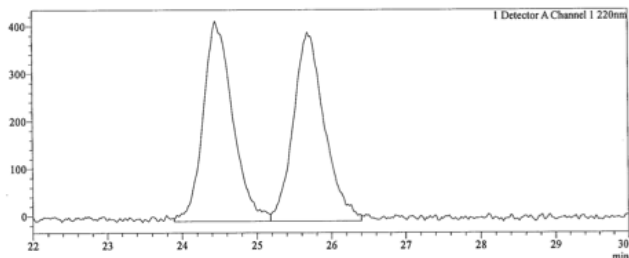

&lt;Peak Table&gt;

| Peak# | Ret. Time | Area     | Height | Conc.  | Area%   |
|-------|-----------|----------|--------|--------|---------|
| 1     | 24.454    | 11631584 | 421378 | 50.223 | 50.223  |
| 2     | 25.688    | 11528194 | 397274 | 49.777 | 49.777  |
| Total |           | 23159778 | 818652 |        | 100.000 |

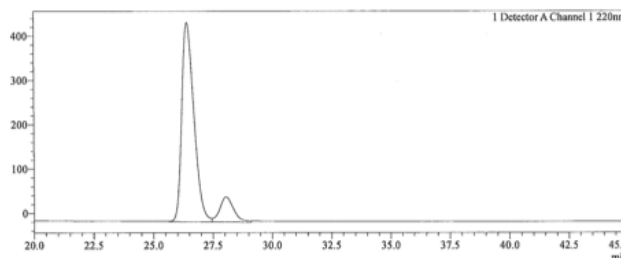

&lt;Peak Table&gt;

| Peak# | Ret. Time | Area     | Height | Conc.  | Area%   |
|-------|-----------|----------|--------|--------|---------|
| 1     | 26.421    | 16081177 | 449962 | 87.377 | 87.377  |
| 2     | 28.054    | 2323107  | 56856  | 12.623 | 12.623  |
| Total |           | 18404284 | 506818 |        | 100.000 |

| Peak # | Time (min) | Area (%) | Peak # | Time (min) | Area (%) |
|--------|------------|----------|--------|------------|----------|
| 1      | 24.454     | 50.223   | 1      | 26.421     | 87.377   |
| 2      | 25.688     | 49.777   | 2      | 28.054     | 12.623   |

**2-(1-(4,4,5,5-Tetramethyl-1,3,2-dioxaborolan-2-yl)pent-4-en-2-yl)-2,3-dihydro-1H-naphtho[1,8-de][1,3,2]diazaborinine (6):** Enantiomeric purity was determined by HPLC analysis in comparison with authentic racemic material (86:14 er shown; Chiralcel OD-H column, 99% hexanes, 0.3 mL/min, 220 nm).

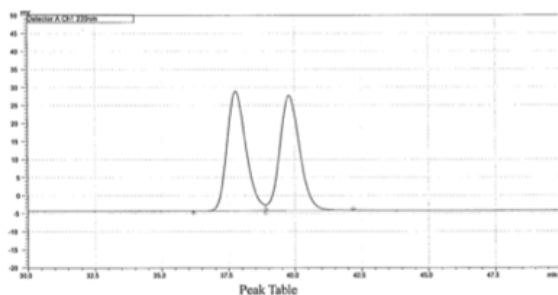

| Peak# | Ret. Time | Area    | Height | Area%   |
|-------|-----------|---------|--------|---------|
| 1     | 37.769    | 1643565 | 33186  | 49.487  |
| 2     | 39.785    | 1677664 | 31993  | 50.513  |
| Total |           | 3321229 | 65179  | 100.000 |

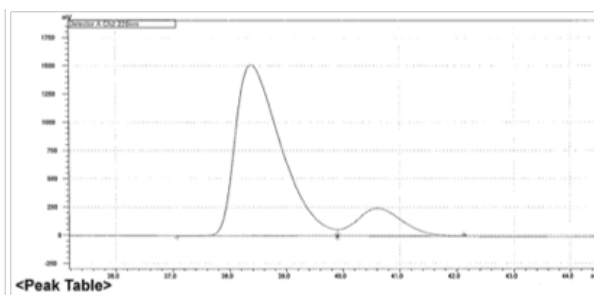

&lt;Peak Table&gt;

| Peak# | Ret. Time | Area     | Height  | Area%   |
|-------|-----------|----------|---------|---------|
| 1     | 38.379    | 84381751 | 1514059 | 85.794  |
| 2     | 40.607    | 13972307 | 247695  | 14.206  |
| Total |           | 98354058 | 1761754 | 100.000 |

| Peak # | Time (min) | Area (%) | Peak # | Time (min) | Area (%) |
|--------|------------|----------|--------|------------|----------|
| 1      | 37.769     | 49.487   | 1      | 38.379     | 85.794   |
| 2      | 39.785     | 50.513   | 2      | 40.607     | 14.206   |

**2,2'-(2-Methylpent-4-ene-1,2-diyl)bis(4,4,5,5-tetramethyl-1,3,2-dioxaborolane) (15):** Enantiomeric purity was determined by HPLC analysis of 1-phenylpent-4-en-2-ol, the product after cross-coupling of **15** with PhBr<sup>4</sup> and oxidation with NaBO<sub>3</sub> in comparison with authentic racemic material (68:32 er shown; Chiralcel OJ-H column, 99% hexanes, 0.3 mL/min, 220 nm).

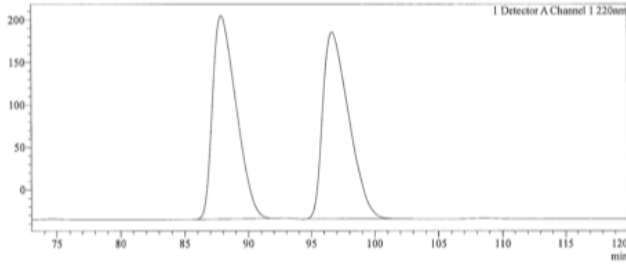

<Peak Table>

| Detector A Channel 1 220nm |           |          |        |        |         |
|----------------------------|-----------|----------|--------|--------|---------|
| Peak#                      | Ret. Time | Area     | Height | Conc.  | Area%   |
| 1                          | 87.903    | 31057175 | 239707 | 49.614 | 49.614  |
| 2                          | 96.660    | 31539975 | 220074 | 50.386 | 50.386  |
| Total                      |           | 62597150 | 459781 |        | 100.000 |

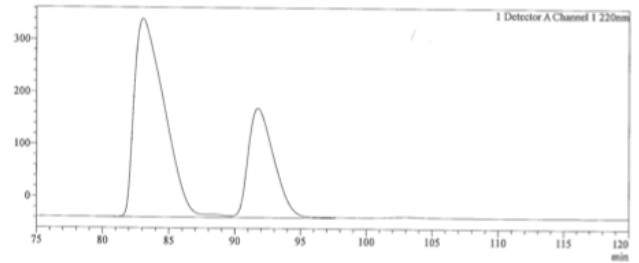

<Peak Table>

| Detector A Channel 1 220nm |           |          |        |        |         |
|----------------------------|-----------|----------|--------|--------|---------|
| Peak#                      | Ret. Time | Area     | Height | Conc.  | Area%   |
| 1                          | 83.028    | 59795957 | 380030 | 67.697 | 67.697  |
| 2                          | 91.727    | 28532698 | 209480 | 32.303 | 32.303  |
| Total                      |           | 88328655 | 589510 |        | 100.000 |

| Peak # | Time (min) | Area (%) | Peak # | Time (min) | Area (%) |
|--------|------------|----------|--------|------------|----------|
| 1      | 87.903     | 49.614   | 1      | 83.028     | 67.697   |
| 2      | 96.660     | 50.386   | 2      | 91.727     | 32.303   |

## 2. Examination of Different Types of Chiral Cu Complexes on Catalytic Enantioselective Variants

**Scheme S1.** Ligand screen for reactions of vinyl-B(pin) and (dan)B-B(pin).<sup>a</sup>

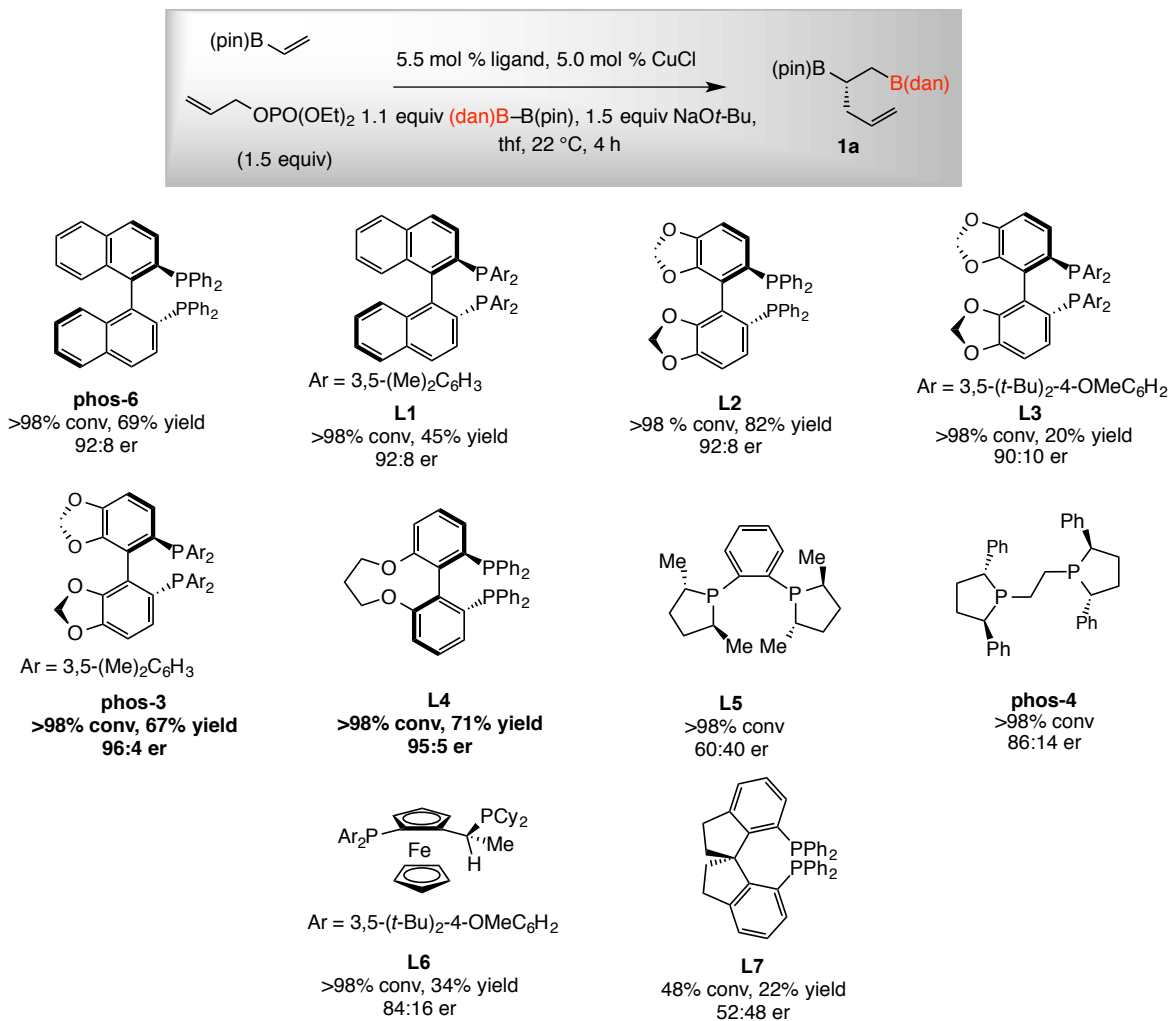

<sup>a</sup>Reactions were carried out under N<sub>2</sub> atm. Conversion determined by analysis of the <sup>1</sup>H NMR spectra of the unpurified mixtures; conv. (±2%) refer to disappearance of a limiting reagent [vinyl-B(pin)]. Yields are for purified products (±5%).

A three-component process with vinyl-B(pin), allylphosphate and (dan)B-B(pin) was examined with various types of chiral Cu complexes as shown in Scheme S1. Reaction with **phos-6** is efficient and enantioselective (69% yield, 92:8 er). Enantioselectivities obtained from binap and seghpos type ligands were high with **phos-3** as the optimal ligand (67% yield, 96:4 er). Reaction with **L4** are similarly efficient and enantioselective; however, **phos-3** is available in a lower price.





### 3. Results of Reactions Affording Vicinal Di-B(pin) Compounds

**Table S1.** Examination of different Cu complexes.<sup>a</sup>

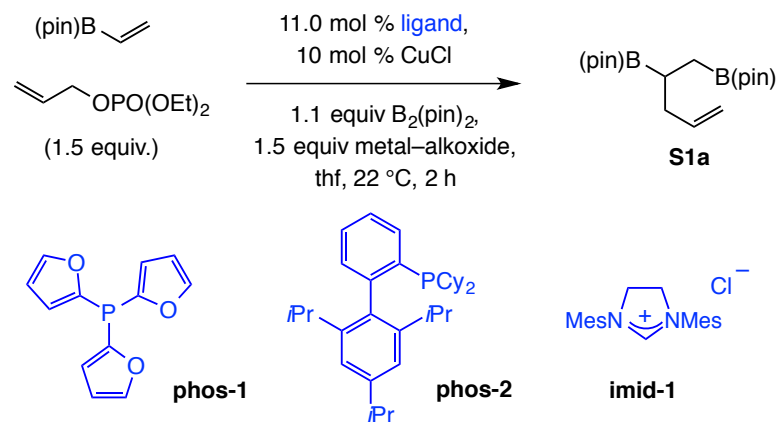

| entry | ligand                        | alkoxide         | conv (%) <sup>b</sup> | yield (%) <sup>c</sup> |
|-------|-------------------------------|------------------|-----------------------|------------------------|
| 1     | none                          | NaO <i>t</i> -Bu | 90                    | 13                     |
| 2     | PPh <sub>3</sub>              | NaO <i>t</i> -Bu | >98                   | 81                     |
| 3     | PPh <sub>3</sub>              | LiO <i>t</i> -Bu | >98                   | 92 (85)                |
| 4     | PPh <sub>3</sub>              | KO <i>t</i> -Bu  | >98                   | 72                     |
| 5     | P( <i>n</i> -Bu) <sub>3</sub> | LiO <i>t</i> -Bu | >98                   | 16                     |
| 6     | PCy <sub>3</sub>              | LiO <i>t</i> -Bu | >98                   | 91(92)                 |
| 7     | <b>phos-1</b>                 | LiO <i>t</i> -Bu | 91                    | 47                     |
| 8     | <b>phos-2</b>                 | LiO <i>t</i> -Bu | 91                    | 53                     |
| 9     | <i>rac</i> -binap             | LiO <i>t</i> -Bu | 96                    | 58                     |
| 10    | <b>imid-1</b>                 | LiO <i>t</i> -Bu | 83                    | 17                     |

<sup>a</sup>Reactions were carried out under N<sub>2</sub> atm. <sup>b</sup>Determined by analysis of the <sup>1</sup>H NMR spectra of the unpurified mixtures; conv. (±2%) refer to disappearance of a limiting reagent [vinyl-B(pin)]. Yields are for purified products (±5%); yields in parenthesis were obtained from reactions quenched after 1 h.

A three-component process with vinyl-B(pin), allylphosphate and B<sub>2</sub>(pin)<sub>2</sub> was investigated as shown in Table S1. With NaO*t*-Bu as the base but in the absence of a ligand there was 90% conv of the limiting reagent [(vinyl-B(pin))] but **S1a** was obtained in 13% yield (entry 1). Addition of 11.0 mol % PPh<sub>3</sub> resulted in substantially improved efficiency affording **S1a** in 81% yield (entry 2). Subsequent evaluation of several mono- and bidentate phosphines including N-heterocyclic carbene (NHC) as a ligand (entries 5–10) indicated that the combination of PCy<sub>3</sub> and LiO*t*-Bu is optimal affording **S1a** in 92% yield after 1 h (entry 6, Table S1).

Various 2-substituted allylic phosphates were used as suitable substrates. Products (**S1b–i**) were obtained in 56–88% yield as shown in Scheme S3.

**Scheme S3.** Reactions with 2-substituted allylic phosphates that afford products with vicinal B(pin) groups.<sup>a</sup>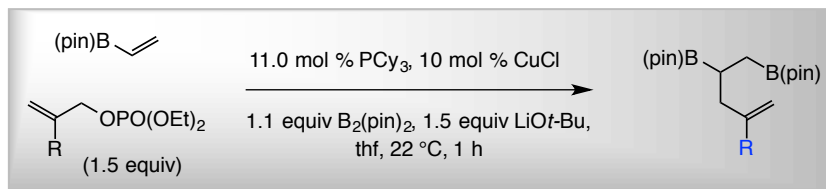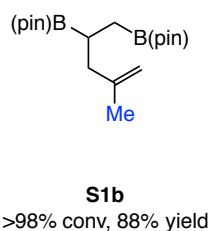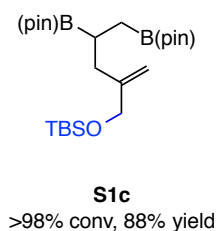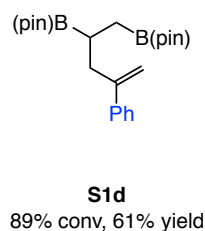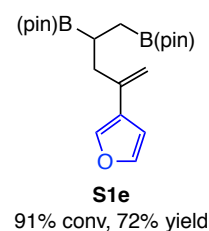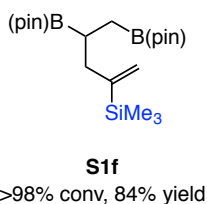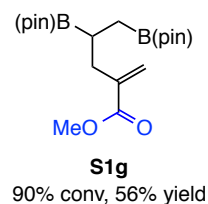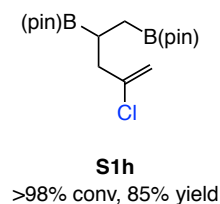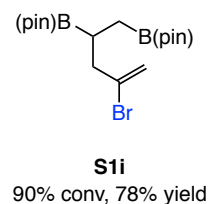<sup>a</sup>See Table S1.

## Representative Procedure for Reactions that Afford Vicinal Di-B(pin) Compounds

In a  $N_2$ -filled glove box, an oven-dried 1 dram vial equipped with a stir bar was charged with  $\text{PCy}_3$  (3.1 mg, 0.011 mmol),  $\text{LiOt-Bu}$  (12 mg, 0.15 mmol), and  $\text{CuCl}$  (1.0 mg, 0.010 mmol), and thf (1.0 mL). The mixture was allowed to stir for 15 min at 22 °C; during this time the solution turned light-yellow.  $B_2(\text{pin})_2$  (27.9 mg, 0.11 mmol) was added to the mixture, causing the solution to turn dark brown immediately. Vinyl-B(pin) (15.4 mg, 0.10 mmol), allylphosphate (29.1 mg, 0.15 mmol), and thf (0.50 mL) were added. The vial was sealed with a cap and electrical tape before removal from the glove box. The resulting mixture was allowed to stir at 22 °C for 1 h. The mixture was then passed through a short plug of silica gel (4 x 1 cm) and eluted with  $\text{Et}_2\text{O}$ . The organic layer was concentrated under reduced pressure, affording yellow oil, which was purified by silica gel chromatography (100% hexanes→hexanes: $\text{Et}_2\text{O}$  = 50:1) to afford **S1a** as colorless oil (29.6 mg, 0.092 mmol, 92% yield).

**2,2'-(Pent-4-ene-1,2-diyl)bis(4,4,5,5-tetramethyl-1,3,2-dioxaborolane) (S1a):** IR (neat): 2978 (m), 2927 (w), 1371 (s), 1314 (s), 1143 (s), 968 (w)  $\text{cm}^{-1}$ ;  $^1\text{H}$  NMR (400 MHz,  $\text{CDCl}_3$ ):  $\delta$  5.84–5.74 (1H, m), 5.00–4.90 (2H, m), 2.25–2.18 (1H, m), 2.11–2.04 (1H, m), 1.22 (12H, s), 1.21 (12H, s), 1.27–1.21 (1H, m), 0.90–0.78 (2H, m);  $^{13}\text{C}$  NMR (100 MHz,  $\text{CDCl}_3$ ):  $\delta$  138.8, 115.1, 83.0, 82.96, 38.0, 25.0, 24.99, 24.93, 24.91; HRMS (DART): Calcd for  $\text{C}_{17}\text{H}_{33}\text{B}_2\text{O}_4$   $[\text{M}+\text{H}]^+$ : 323.2565, Found: 323.2575.

**2,2'-(4-Methylpent-4-ene-1,2-diyl)bis(4,4,5,5-tetramethyl-1,3,2-dioxaborolane) (S1b):** IR (neat): 2978 (m), 2928 (w), 1370 (s), 1314 (s), 1143 (s), 968 (w)  $\text{cm}^{-1}$ ;  $^1\text{H}$  NMR (400 MHz,  $\text{CDCl}_3$ ):  $\delta$  4.68 (1H, d,  $J = 1.6$  Hz), 4.66 (1H, d,  $J = 0.8$  Hz), 2.20 (1H, dd,  $J = 14.0, 7.2$  Hz), 2.00 (1H, dd,  $J = 14.2, 8.6$  Hz), 1.58 (3H, s), 1.35–1.27 (1H, m), 1.22 (12H, s), 1.217 (12H, s), 0.85–0.74 (2H, m);  $^{13}\text{C}$  NMR (100 MHz,  $\text{CDCl}_3$ ):  $\delta$  135.2, 117.2, 83.3, 83.1, 44.6, 25.0, 24.97, 24.9; HRMS (DART): Calcd for  $\text{C}_{18}\text{H}_{35}\text{B}_2\text{O}_4$   $[\text{M}+\text{H}]^+$ : 337.2721, Found: 337.2722.

**tert-Butyldimethyl((2-methylene-4,5-bis(4,4,5,5-tetramethyl-1,3,2-dioxaborolan-2-yl)pentyl)oxy)silane (S1c):** IR (neat): 2977 (w), 2929 (w), 2856 (w), 1370 (s), 1313 (s), 1252 (m), 1142 (s), 1101 (m), 968 (m), 836 (s), 776 (m)  $\text{cm}^{-1}$ ;  $^1\text{H}$  NMR (400 MHz,  $\text{CDCl}_3$ ):  $\delta$  5.05–5.04 (1H, m), 4.83–4.81 (1H, m), 4.05 (2H, s), 2.19 (1H, dd,  $J = 14.6, 7.4$  Hz), 1.98 (1H, dd,  $J = 14.4, 8.4$  Hz), 1.33–1.19 (1H, m), 1.22 (12H, s), 1.21 (12H, s), 0.90 (9H, s), 0.88–0.74 (2H, m), 0.05 (6H, s);  $^{13}\text{C}$  NMR (100 MHz,  $\text{CDCl}_3$ ):  $\delta$  148.0, 108.9, 83.0, 82.99, 65.7, 36.7, 26.1, 25.0, 24.97, 24.9, 18.6, –5.2; HRMS (DART): Calcd for  $\text{C}_{24}\text{H}_{52}\text{B}_2\text{N}_1\text{O}_5\text{Si}_1$   $[\text{M}+\text{NH}_4]^+$ : 484.3801, Found: 484.3795.

**2,2'-(4-Phenylpent-4-ene-1,2-diyl)bis(4,4,5,5-tetramethyl-1,3,2-dioxaborolane) (S1d):** IR (neat): 2977 (m), 2927 (w), 1370 (s), 1313 (s), 1142 (s), 968 (m)  $\text{cm}^{-1}$ ;  $^1\text{H}$  NMR (400 MHz,  $\text{CDCl}_3$ ):  $\delta$  7.43–7.41 (2H, m), 7.30–7.22 (3H, m), 5.25 (1H, d,  $J = 2.0$  Hz), 5.06 (1H, d,  $J = 1.2$  Hz), 2.73 (1H, dd,  $J = 13.6, 7.6$  Hz), 2.48 (1H, dd,  $J = 14.6, 7.8$  Hz), 1.34–1.27 (1H, m), 1.22 (12H, s), 1.21 (12H, s), 0.88–0.79 (2H, m);  $^{13}\text{C}$  NMR (100 MHz,  $\text{CDCl}_3$ ):  $\delta$  148.4, 141.6, 128.2, 127.2, 126.5, 113.2, 83.0, 82.99, 39.0, 25.0, 24.99, 24.96, 24.92; HRMS (DART): Calcd for  $\text{C}_{23}\text{H}_{40}\text{B}_2\text{N}_1\text{O}_4$   $[\text{M}+\text{NH}_4]^+$ : 416.3143, Found: 416.3127.

**2,2'-(4-(Furan-3-yl)pent-4-ene-1,2-diyl)bis(4,4,5,5-tetramethyl-1,3,2-dioxaborolane) (S1e):** IR (neat): 2977 (m), 2928 (w), 1369 (s), 1312 (s), 1140 (s), 968 (m), 872 (m)  $\text{cm}^{-1}$ ;  $^1\text{H}$  NMR (400 MHz,  $\text{CDCl}_3$ ):  $\delta$  7.54 (1H, s), 7.32 (1H, t,  $J = 1.6$  Hz), 6.51 (1H, dd,  $J = 1.8, 1.0$  Hz), 5.20 (1H, d,  $J = 1.2$  Hz), 4.93 (1H, d,  $J = 1.6$  Hz), 2.54 (1H, ddd,  $J = 14.1, 7.9, 0.9$  Hz), 2.30 (1H, dd,  $J = 14.0, 7.6$  Hz), 1.46–1.37 (1H, m), 1.23 (12H, s), 1.21 (12H, s), 0.90–0.81 (2H, m);  $^{13}\text{C}$  NMR (100 MHz,  $\text{CDCl}_3$ ):  $\delta$  142.9, 139.5, 139.3, 126.8, 110.9, 108.5, 83.1, 83.0, 38.7, 25.03, 25.01, 24.96, 24.94; HRMS (DART): Calcd for  $\text{C}_{21}\text{H}_{35}\text{B}_2\text{O}_5$   $[\text{M}+\text{H}]^+$ : 389.2671, Found: 389.2667.

**(4,5-Bis(4,4,5,5-tetramethyl-1,3,2-dioxaborolan-2-yl)pent-1-en-2-yl)trimethylsilane (S1f):** IR (neat): 2977 (m), 1370 (s), 1313 (s), 1247 (m), 1142 (s), 968 (m), 836 (s)  $\text{cm}^{-1}$ ;  $^1\text{H}$  NMR (400 MHz,  $\text{CDCl}_3$ ):  $\delta$  5.57–5.56 (1H, m), 5.31–5.30 (1H, m), 2.38–2.32 (1H, m), 2.08 (1H, dd,  $J = 14.6, 8.2$  Hz), 1.37–1.29 (1H, m), 1.22 (12H, s), 1.20 (12H, s), 0.86–0.73 (2H, m), 0.07 (9H, s);  $^{13}\text{C}$  NMR (100 MHz,  $\text{CDCl}_3$ ):  $\delta$  152.0, 124.4, 82.9, 82.87, 39.7, 25.0, 24.96, 24.9, –1.2; HRMS (DART): Calcd for  $\text{C}_{20}\text{H}_{44}\text{B}_2\text{N}_1\text{O}_4\text{Si}_1$   $[\text{M}+\text{NH}_4]^+$ : 412.3226, Found: 412.3222.

**Methyl 2-methylene-4,5-bis(4,4,5,5-tetramethyl-1,3,2-dioxaborolan-2-yl)pentanoate (S1g):** IR (neat): 2978 (m), 2928 (w), 1722 (m), 1629 (w), 1370 (s), 1315 (s), 1141 (s), 968 (m)  $\text{cm}^{-1}$ ;  $^1\text{H}$  NMR (400 MHz,  $\text{CDCl}_3$ ):  $\delta$  6.14 (1H, d,  $J = 1.2$  Hz), 5.53 (1H, dd,  $J = 2.8, 1.2$  Hz), 3.72 (3H, s), 2.54 (1H, ddd,  $J = 14.6, 7.4, 0.8$  Hz), 2.26 (1H, dd,  $J = 14.5, 7.7$  Hz), 1.40–1.33 (1H, m), 1.22 (24H, s), 0.83 (2H, d,  $J = 7.6$  Hz);  $^{13}\text{C}$  NMR (100 MHz,  $\text{CDCl}_3$ ):  $\delta$  168.0, 140.4, 125.5, 83.1,

83.06, 51.8, 35.4, 30.5, 25.0, 24.98, 24.9; HRMS (DART): Calcd for  $C_{19}H_{35}B_2O_6$   $[M+H]^+$ : 381.2620, Found: 381.2635.

**2,2'-(4-Chloropent-4-ene-1,2-diyl)bis(4,4,5,5-tetramethyl-1,3,2-dioxaborolane) (S1h):** IR (neat): 2979 (m), 2929 (w), 1633 (w), 1371 (s), 1317 (s), 1142 (s), 968 (w)  $cm^{-1}$ ;  $^1H$  NMR (400 MHz,  $CDCl_3$ ):  $\delta$  5.13 (1H, d,  $J = 0.8$  Hz), 5.10 (1H, d,  $J = 1.2$  Hz), 2.52 (1H, ddd,  $J = 14.7, 6.5, 0.9$  Hz), 2.35 (1H, ddd,  $J = 14.8, 8.8, 0.4$  Hz), 1.53–1.42 (1H, m), 1.22 (24H, s), 0.90–0.79 (2H, m);  $^{13}C$  NMR (100 MHz,  $CDCl_3$ ):  $\delta$  143.0, 112.7, 83.3, 83.1, 42.4, 25.0, 24.97, 24.93, 24.92; HRMS (DART): Calcd for  $C_{17}H_{32}B_2Cl_1O_4$   $[M+H]^+$ : 357.2175, Found: 357.2179.

**2,2'-(4-Bromopent-4-ene-1,2-diyl)bis(4,4,5,5-tetramethyl-1,3,2-dioxaborolane) (S1i):** IR (neat): 2977 (m), 2928 (w), 1627 (w), 1369 (s), 1313 (s), 1139 (s), 967 (m), 882 (m), 856 (m), 844 (m)  $cm^{-1}$ ;  $^1H$  NMR (400 MHz,  $CDCl_3$ ):  $\delta$  5.54 (1H, d,  $J = 1.2$  Hz), 5.38 (1H, d,  $J = 1.2$  Hz), 2.61 (1H, dd,  $J = 14.2, 5.8$  Hz), 2.43 (1H, dd,  $J = 15.0, 9.0$  Hz), 1.54–1.46 (1H, m), 1.23 (24H, s), 0.91–0.78 (2H, m);  $^{13}C$  NMR (100 MHz,  $CDCl_3$ ):  $\delta$  135.2, 117.2, 83.3, 83.1, 44.6, 25.0, 24.97, 24.9; HRMS (DART): Calcd for  $C_{17}H_{32}B_2Br_1O_4$   $[M+H]^+$ : 401.1670, Found: 401.1684.

**Scheme S4.** Reactions with 2-propenyl-B(pin) that afford products containing a tertiary C-B(pin).<sup>a</sup>

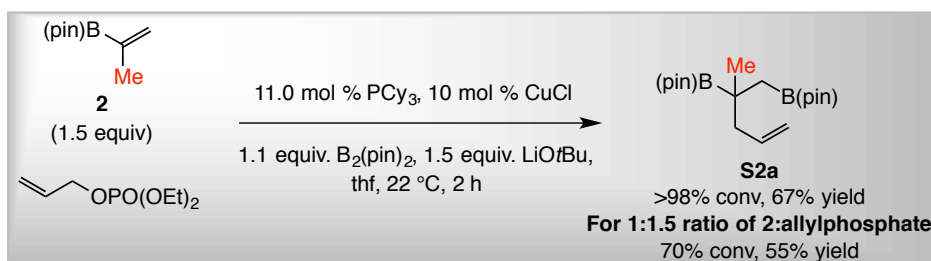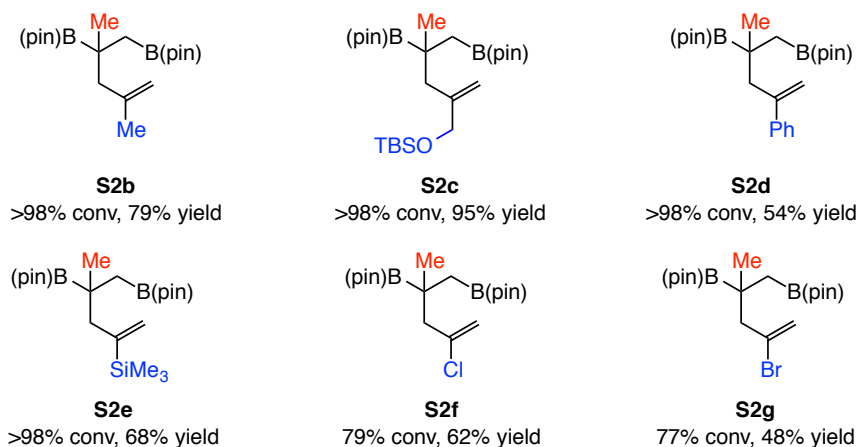

<sup>a</sup>See Table S1.

A three-component process with isopropenyl-B(pin) (**2**), allylphosphate and  $B_2(pin)_2$  was also examined as shown in Scheme S4. Use of slightly excess of **2** is required for optimal efficiency. Several 2-substituted allylic phosphates can be used as substrates. Products (**S2a–g**) were obtained in 48–95% yield as shown in Scheme S4.

## Representative Procedure for Reactions with 2-Propenyl–B(pin)

In a N<sub>2</sub>-filled glove box, an oven-dried 1 dram vial equipped with a stir bar was charged with PCy<sub>3</sub> (3.1 mg, 0.011 mmol), LiOt-Bu (12 mg, 0.15 mmol), and CuCl (1.0 mg, 0.010 mmol), and thf (1.0 mL). The mixture was allowed to stir for 15 min at 22 °C; during this time the solution turned light-yellow. B<sub>2</sub>(pin)<sub>2</sub> (27.9 mg, 0.11 mmol) was added to the mixture, causing the solution to turn dark brown immediately. 2-Propenyl–B(pin) (25.2 mg, 0.15 mmol), allylphosphate (19.4 mg, 0.10 mmol), and thf (0.50 mL) were added. The vial was sealed with a cap and electrical tape before removal from the glove box. The resulting mixture was allowed to stir at 22 °C for 2 h. The mixture was then passed through a short plug of silica gel (4 x 1 cm) and eluted with Et<sub>2</sub>O. The organic layer was concentrated under reduced pressure, affording yellow oil, which was purified by silica gel chromatography (100% hexanes→hexanes:Et<sub>2</sub>O = 50:1) to afford **S2a** as colorless oil (22.5 mg, 0.067 mmol, 67% yield).

**2,2'-(2-Methylpent-4-ene-1,2-diyl)bis(4,4,5,5-tetramethyl-1,3,2-dioxaborolane) (S2a):** IR (neat): 2977 (m), 2930 (w), 1360 (s), 1307 (s), 1139 (s), 969 (m), 845 (m) cm<sup>-1</sup>; <sup>1</sup>H NMR (400 MHz, CDCl<sub>3</sub>): δ 5.82 (1H, ddt, *J* = 17.0, 10.2, 7.4 Hz), 2.13 (1H, dd, *J* = 14.2, 7.2 Hz), 2.05 (1H, dd, *J* = 14.2, 7.0 Hz), 1.23 (12H, s), 1.21 (12H, s), 0.96 (3H, s), 0.94 (1H, d, *J* = 15.2 Hz), 0.70 (1H, d, *J* = 16.0 Hz); <sup>13</sup>C NMR (100 MHz, CDCl<sub>3</sub>): δ 136.9, 116.2, 83.1, 82.9, 46.0, 25.1, 25.0, 24.9, 24.89, 24.0; HRMS (DART): Calcd for C<sub>18</sub>H<sub>35</sub>B<sub>2</sub>O<sub>4</sub> [M+H]<sup>+</sup>: 337.2721, Found: 337.2738.

**2,2'-(2,4-Dimethylpent-4-ene-1,2-diyl)bis(4,4,5,5-tetramethyl-1,3,2-dioxaborolane) (S2b):** IR (neat): 2977 (m), 2929 (w), 1461 (m), 1370 (s), 1359 (s), 1307 (s), 1213 (m), 1142 (s), 969 (m), 848 (m) cm<sup>-1</sup>; <sup>1</sup>H NMR (400 MHz, CDCl<sub>3</sub>): δ 4.74–4.72 (1H, m), 4.66 (1H, s), 2.18 (1H, d, *J* = 13.6 Hz), 2.06 (1H, d, *J* = 13.6 Hz), 1.72, (3H, s), 1.23 (12H, s), 1.22 (12H, s), 0.99 (3H, s), 0.96 (1H, d, *J* = 16.0 Hz), 0.73 (1H, d, *J* = 15.6 Hz); <sup>13</sup>C NMR (100 MHz, CDCl<sub>3</sub>): δ 144.8, 112.8, 83.2, 82.9, 49.1, 25.1, 25.06, 24.9, 24.7, 24.3; HRMS (DART): Calcd for C<sub>19</sub>H<sub>37</sub>B<sub>2</sub>O<sub>4</sub> [M+H]<sup>+</sup>: 351.2878, Found: 351.2892.

**tert-Butyldimethyl((4-methyl-2-methylene-4,5-bis(4,4,5,5-tetramethyl-1,3,2-dioxaborolan-2-yl)pentyl)oxy)silane (S2c):** IR (neat): 2977 (m), 2929 (m), 2857 (m), 1462 (m), 1370 (s), 1360 (s), 1309 (s), 1253 (m), 1213 (m), 1142 (s), 1109 (s), 970 (m), 836 (s), 775 (s) cm<sup>-1</sup>; <sup>1</sup>H NMR (400 MHz, CDCl<sub>3</sub>): δ 5.14–5.12 (1H, m), 4.86 (1H, s), 4.03 (2H, s), 2.13 (1H, d, *J* = 14.0 Hz), 2.02 (1H, d, *J* = 14.4 Hz), 1.23 (12H, s), 1.22 (12H, s), 0.98 (3H, s), 0.94 (1H, d, *J* = 15.6 Hz), 0.90 (9H, s), 0.75 (1H, d, *J* = 15.6 Hz), 0.04 (6H, s); <sup>13</sup>C NMR (100 MHz, CDCl<sub>3</sub>): δ 146.9, 110.6, 83.2, 82.9, 66.9, 43.7, 26.1, 25.1, 25.07, 25.0, 24.9, 24.4, 18.5, -5.2; HRMS (DART): Calcd for C<sub>25</sub>H<sub>54</sub>B<sub>2</sub>N<sub>1</sub>O<sub>5</sub>Si<sub>1</sub> [M+NH<sub>4</sub>]<sup>+</sup>: 498.3967, Found: 498.3969.

**2,2'-(2-Methyl-4-phenylpent-4-ene-1,2-diyl)bis(4,4,5,5-tetramethyl-1,3,2-dioxaborolane) (S2d):** IR (neat): 2977 (m), 2928 (w), 1463 (w), 1369 (s), 1359 (s), 1310 (s), 1213 (m), 1143 (s), 970 (m), 700 (m) cm<sup>-1</sup>; <sup>1</sup>H NMR (400 MHz, CDCl<sub>3</sub>): δ 7.40–7.38 (2H, m), 7.28–7.18 (3H, m), 5.20 (1H, d, *J* = 2.0 Hz), 5.07 (1H, s), 2.72 (1H, d, *J* = 14.0 Hz), 2.57 (1H, d, *J* = 14.0 Hz), 1.21 (6H, s), 1.207 (6H, s), 1.14 (12H, s), 0.95 (1H, d, *J* = 15.6 Hz), 0.86 (3H, s), 0.72 (1H, d, *J* = 15.6 Hz); <sup>13</sup>C NMR (100 MHz, CDCl<sub>3</sub>): δ 147.8, 143.9, 128.1, 127.0, 126.9, 116.1, 83.1, 82.9, 45.7,

25.1, 25.05, 24.94, 24.9; HRMS (DART): Calcd for  $C_{24}H_{42}B_2N_1O_4$   $[M+NH_4]^+$ : 430.3300, Found: 430.3287.

**Trimethyl(4-methyl-4,5-bis(4,4,5,5-tetramethyl-1,3,2-dioxaborolan-2-yl)pent-1-en-2-yl)silane (S2e)**: IR (neat): 2977 (m), 1465 (w), 1378 (s), 1370 (s), 1359 (s), 1310 (s), 1248 (m), 1143 (s), 970 (m), 837 (s)  $cm^{-1}$ ;  $^1H$  NMR (400 MHz,  $CDCl_3$ ):  $\delta$  5.67–5.65 (1H, m), 5.41–5.40 (1H, m), 2.32 (1H, dt,  $J = 15.6, 1.4$  Hz), 2.12 (1H, dd,  $J = 15.6, 1.2$  Hz), 1.23 (24H, s), 1.01 (3H, s), 0.99 (1H, d,  $J = 14.4$  Hz), 0.74 (1H, d,  $J = 15.2$  Hz), 0.06 (9H, s);  $^{13}C$  NMR (100 MHz,  $CDCl_3$ ):  $\delta$  150.8, 125.4, 83.1, 82.9, 45.5, 25.2, 25.1, 24.9, 24.0, -1.1; HRMS (DART): Calcd for  $C_{121}H_{43}B_2O_4Si_1$   $[M+H]^+$ : 409.3117, Found: 409.3119.

**2,2'-(4-Chloro-2-methylpent-4-ene-1,2-diyl)bis(4,4,5,5-tetramethyl-1,3,2-dioxaborolane) (S2f)**: IR (neat): 2977 (m), 2929 (w), 1629 (w), 1461 (w), 1369 (s), 1311 (s), 1138 (s), 969 (m), 845 (m)  $cm^{-1}$ ;  $^1H$  NMR (400 MHz,  $CDCl_3$ ):  $\delta$  5.17 (1H, d,  $J = 1.2$  Hz), 5.11 (1H, d,  $J = 1.2$  Hz), 2.54 (1H, d,  $J = 14.4$  Hz), 2.45 (1H, d,  $J = 14.8$  Hz), 1.24 (12H, s), 1.22 (12H, s), 1.05 (3H, s), 1.02 (1H, d,  $J = 15.6$  Hz), 0.80 (1H, d,  $J = 16.0$  Hz);  $^{13}C$  NMR (100 MHz,  $CDCl_3$ ):  $\delta$  141.5, 114.4, 83.4, 83.0, 49.4, 25.1, 25.03, 25.0, 24.9, 23.8; HRMS (DART): Calcd for  $C_{18}H_{34}B_2Cl_1O_4$   $[M+H]^+$ : 371.2332, Found: 371.2323.

**2,2'-(4-Bromo-2-methylpent-4-ene-1,2-diyl)bis(4,4,5,5-tetramethyl-1,3,2-dioxaborolane) (S2g)**: IR (neat): 2977 (m), 2929 (w), 1623 (w), 1462 (m), 1369 (s), 1313 (s), 1140 (s), 969 (m), 845 (m)  $cm^{-1}$ ;  $^1H$  NMR (400 MHz,  $CDCl_3$ ):  $\delta$  5.57 (1H, d,  $J = 1.2$  Hz), 5.45 (1H, d,  $J = 1.6$  Hz), 2.67 (1H, d,  $J = 14.8$  Hz), 2.58 (1H, d,  $J = 14.8$  Hz), 1.25 (12H, s), 1.23 (12H, s), 1.07 (3H, s), 1.04 (1H, d,  $J = 16.0$  Hz), 0.83 (1H, d,  $J = 15.6$  Hz);  $^{13}C$  NMR (100 MHz,  $CDCl_3$ ):  $\delta$  132.4, 119.0, 83.4, 83.0, 51.2, 25.1, 25.0, 24.97, 23.8; HRMS (DART): Calcd for  $C_{18}H_{34}B_2Br_1O_4$   $[M+H]^+$ : 415.1827, Found: 415.1843.

## 4. X-ray Crystallography Data

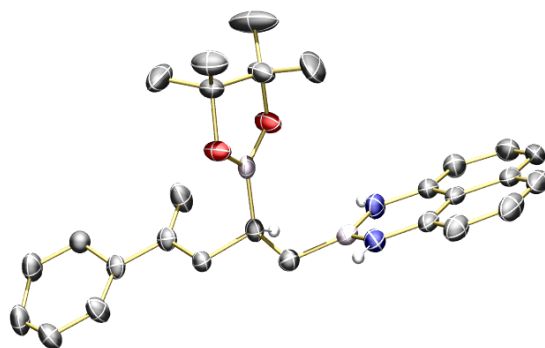

X-ray structure of 1d

**Table S1. Crystal data and structure refinement for  $C_{27}H_{32}B_2N_2O_2$ .**

|                                 |                                             |                             |
|---------------------------------|---------------------------------------------|-----------------------------|
| Identification code             | C27H32B2N2O2                                |                             |
| Empirical formula               | C27 H32 B2 N2 O2                            |                             |
| Formula weight                  | 438.16                                      |                             |
| Temperature                     | 100(2) K                                    |                             |
| Wavelength                      | 1.54178 Å                                   |                             |
| Crystal system                  | Monoclinic                                  |                             |
| Space group                     | P2 <sub>1</sub> /n                          |                             |
| Unit cell dimensions            | a = 11.7928(4) Å                            | $\alpha = 90^\circ$ .       |
|                                 | b = 9.8354(4) Å                             | $\beta = 95.934(3)^\circ$ . |
|                                 | c = 20.6121(8) Å                            | $\gamma = 90^\circ$ .       |
| Volume                          | 2377.92(16) Å <sup>3</sup>                  |                             |
| Z                               | 4                                           |                             |
| Density (calculated)            | 1.224 Mg/m <sup>3</sup>                     |                             |
| Absorption coefficient          | 0.586 mm <sup>-1</sup>                      |                             |
| F(000)                          | 936                                         |                             |
| Crystal size                    | 0.200 x 0.200 x 0.080 mm <sup>3</sup>       |                             |
| Theta range for data collection | 4.144 to 69.789°.                           |                             |
| Index ranges                    | -14 ≤ h ≤ 13, -11 ≤ k ≤ 9, -24 ≤ l ≤ 24     |                             |
| Reflections collected           | 11807                                       |                             |
| Independent reflections         | 4197 [R(int) = 0.0410]                      |                             |
| Completeness to theta = 66.500° | 97.0 %                                      |                             |
| Absorption correction           | Semi-empirical from equivalents             |                             |
| Max. and min. transmission      | 0.7533 and 0.6540                           |                             |
| Refinement method               | Full-matrix least-squares on F <sup>2</sup> |                             |

|                                      |                                       |
|--------------------------------------|---------------------------------------|
| Data / restraints / parameters       | 4197 / 0 / 324                        |
| Goodness-of-fit on $F^2$             | 1.036                                 |
| Final R indices [ $I > 2\sigma(I)$ ] | R1 = 0.0489, wR2 = 0.1220             |
| R indices (all data)                 | R1 = 0.0724, wR2 = 0.1361             |
| Extinction coefficient               | n/a                                   |
| Largest diff. peak and hole          | 0.247 and -0.222 e. $\text{\AA}^{-3}$ |

**Table S2. Atomic coordinates ( $\times 10^4$ ) and equivalent isotropic displacement parameters ( $\text{\AA}^2 \times 10^3$ ) for  $\text{C}_{27}\text{H}_{32}\text{B}_2\text{N}_2\text{O}_2$ . U(eq) is defined as one third of the trace of the orthogonalized  $U_{ij}$  tensor.**

|       | x       | y        | z       | U(eq) |
|-------|---------|----------|---------|-------|
| O(1)  | 3349(1) | 5792(2)  | 5712(1) | 38(1) |
| O(2)  | 3952(1) | 6823(2)  | 6673(1) | 42(1) |
| N(1)  | 6786(1) | 6903(2)  | 6488(1) | 34(1) |
| N(2)  | 7137(1) | 5288(2)  | 5663(1) | 32(1) |
| B(1)  | 6521(2) | 6431(2)  | 5838(1) | 30(1) |
| B(2)  | 3961(2) | 6847(2)  | 6011(1) | 28(1) |
| C(1)  | 2750(2) | 9637(3)  | 5920(1) | 45(1) |
| C(2)  | 2890(2) | 9456(2)  | 5294(1) | 30(1) |
| C(3)  | 3844(2) | 8597(2)  | 5078(1) | 28(1) |
| C(4)  | 4623(2) | 7894(2)  | 5624(1) | 28(1) |
| C(5)  | 5605(2) | 7140(2)  | 5333(1) | 31(1) |
| C(6)  | 7666(2) | 6371(2)  | 6922(1) | 32(1) |
| C(7)  | 7965(2) | 6926(2)  | 7531(1) | 39(1) |
| C(8)  | 8870(2) | 6368(3)  | 7939(1) | 43(1) |
| C(9)  | 9453(2) | 5258(2)  | 7757(1) | 42(1) |
| C(10) | 9162(2) | 4641(2)  | 7139(1) | 35(1) |
| C(11) | 9725(2) | 3477(2)  | 6932(1) | 43(1) |
| C(12) | 9441(2) | 2955(2)  | 6323(1) | 45(1) |
| C(13) | 8590(2) | 3552(2)  | 5887(1) | 40(1) |
| C(14) | 7999(2) | 4668(2)  | 6075(1) | 32(1) |
| C(15) | 8268(2) | 5229(2)  | 6711(1) | 30(1) |
| C(16) | 2104(2) | 10109(2) | 4775(1) | 30(1) |
| C(17) | 2199(2) | 9898(2)  | 4118(1) | 40(1) |



|        |         |           |         |       |
|--------|---------|-----------|---------|-------|
| C(18)  | 1470(2) | 10514(2)  | 3633(1) | 40(1) |
| C(19)  | 635(2)  | 11367(3)  | 3788(1) | 47(1) |
| C(20)  | 655(8)  | 11816(12) | 4419(4) | 53(2) |
| C(21)  | 1355(7) | 11184(11) | 4901(2) | 43(2) |
| C(20X) | 348(11) | 11257(16) | 4447(5) | 43(3) |
| C(21X) | 1095(7) | 10655(12) | 4933(3) | 32(2) |
| C(22)  | 2708(2) | 5148(2)   | 6207(1) | 37(1) |
| C(23)  | 3464(2) | 5513(2)   | 6838(1) | 44(1) |
| C(24)  | 1552(2) | 5821(3)   | 6140(2) | 65(1) |
| C(25)  | 2588(2) | 3658(3)   | 6065(1) | 57(1) |
| C(26)  | 4463(2) | 4551(4)   | 6987(2) | 86(1) |
| C(27)  | 2815(3) | 5711(4)   | 7429(1) | 90(1) |

---

**Table S3. Bond lengths [ $\text{\AA}$ ] and angles [ $^\circ$ ] for  $\text{C}_{27}\text{H}_{32}\text{B}_2\text{N}_2\text{O}_2$ .**

---

|            |          |
|------------|----------|
| O(1)-B(2)  | 1.373(3) |
| O(1)-C(22) | 1.474(2) |
| O(2)-B(2)  | 1.365(2) |
| O(2)-C(23) | 1.466(3) |
| N(1)-C(6)  | 1.400(2) |
| N(1)-B(1)  | 1.422(3) |
| N(1)-H(1N) | 0.87(2)  |
| N(2)-C(14) | 1.396(2) |
| N(2)-B(1)  | 1.406(3) |
| N(2)-H(2N) | 0.87(2)  |
| B(1)-C(5)  | 1.582(3) |
| B(2)-C(4)  | 1.560(3) |
| C(1)-C(2)  | 1.331(3) |
| C(1)-H(1A) | 0.9500   |
| C(1)-H(1B) | 0.9500   |
| C(2)-C(16) | 1.487(3) |
| C(2)-C(3)  | 1.510(3) |
| C(3)-C(4)  | 1.541(2) |
| C(3)-H(3A) | 0.9900   |
| C(3)-H(3B) | 0.9900   |

|               |           |
|---------------|-----------|
| C(4)-C(5)     | 1.548(2)  |
| C(4)-H(4)     | 1.0000    |
| C(5)-H(5A)    | 0.9900    |
| C(5)-H(5B)    | 0.9900    |
| C(6)-C(7)     | 1.379(3)  |
| C(6)-C(15)    | 1.421(3)  |
| C(7)-C(8)     | 1.402(3)  |
| C(7)-H(7)     | 0.9500    |
| C(8)-C(9)     | 1.364(3)  |
| C(8)-H(8)     | 0.9500    |
| C(9)-C(10)    | 1.421(3)  |
| C(9)-H(9)     | 0.9500    |
| C(10)-C(11)   | 1.411(3)  |
| C(10)-C(15)   | 1.426(3)  |
| C(11)-C(12)   | 1.365(3)  |
| C(11)-H(11)   | 0.9500    |
| C(12)-C(13)   | 1.405(3)  |
| C(12)-H(12)   | 0.9500    |
| C(13)-C(14)   | 1.377(3)  |
| C(13)-H(13)   | 0.9500    |
| C(14)-C(15)   | 1.427(3)  |
| C(16)-C(21X)  | 1.375(7)  |
| C(16)-C(17)   | 1.386(3)  |
| C(16)-C(21)   | 1.418(5)  |
| C(17)-C(18)   | 1.389(3)  |
| C(17)-H(17)   | 0.9500    |
| C(18)-C(19)   | 1.357(3)  |
| C(18)-H(18)   | 0.9500    |
| C(19)-C(20)   | 1.372(8)  |
| C(19)-C(20X)  | 1.438(11) |
| C(19)-H(19)   | 0.9500    |
| C(20)-C(21)   | 1.373(8)  |
| C(20)-H(20)   | 0.9500    |
| C(21)-H(21)   | 0.9500    |
| C(20X)-C(21X) | 1.395(12) |
| C(20X)-H(20X) | 0.9500    |

|                  |            |
|------------------|------------|
| C(21X)-H(21X)    | 0.9500     |
| C(22)-C(25)      | 1.499(3)   |
| C(22)-C(24)      | 1.509(3)   |
| C(22)-C(23)      | 1.540(3)   |
| C(23)-C(26)      | 1.518(4)   |
| C(23)-C(27)      | 1.518(3)   |
| C(24)-H(24A)     | 0.9800     |
| C(24)-H(24B)     | 0.9800     |
| C(24)-H(24C)     | 0.9800     |
| C(25)-H(25A)     | 0.9800     |
| C(25)-H(25B)     | 0.9800     |
| C(25)-H(25C)     | 0.9800     |
| C(26)-H(26A)     | 0.9800     |
| C(26)-H(26B)     | 0.9800     |
| C(26)-H(26C)     | 0.9800     |
| C(27)-H(27A)     | 0.9800     |
| C(27)-H(27B)     | 0.9800     |
| C(27)-H(27C)     | 0.9800     |
|                  |            |
| B(2)-O(1)-C(22)  | 107.35(15) |
| B(2)-O(2)-C(23)  | 106.93(16) |
| C(6)-N(1)-B(1)   | 123.84(18) |
| C(6)-N(1)-H(1N)  | 113.8(16)  |
| B(1)-N(1)-H(1N)  | 122.2(16)  |
| C(14)-N(2)-B(1)  | 123.80(18) |
| C(14)-N(2)-H(2N) | 117.4(16)  |
| B(1)-N(2)-H(2N)  | 118.8(16)  |
| N(2)-B(1)-N(1)   | 115.72(18) |
| N(2)-B(1)-C(5)   | 121.32(18) |
| N(1)-B(1)-C(5)   | 122.96(19) |
| O(2)-B(2)-O(1)   | 112.13(17) |
| O(2)-B(2)-C(4)   | 125.32(18) |
| O(1)-B(2)-C(4)   | 122.50(16) |
| C(2)-C(1)-H(1A)  | 120.0      |
| C(2)-C(1)-H(1B)  | 120.0      |
| H(1A)-C(1)-H(1B) | 120.0      |

|                   |            |
|-------------------|------------|
| C(1)-C(2)-C(16)   | 120.56(18) |
| C(1)-C(2)-C(3)    | 122.15(18) |
| C(16)-C(2)-C(3)   | 117.29(15) |
| C(2)-C(3)-C(4)    | 116.20(15) |
| C(2)-C(3)-H(3A)   | 108.2      |
| C(4)-C(3)-H(3A)   | 108.2      |
| C(2)-C(3)-H(3B)   | 108.2      |
| C(4)-C(3)-H(3B)   | 108.2      |
| H(3A)-C(3)-H(3B)  | 107.4      |
| C(3)-C(4)-C(5)    | 110.19(14) |
| C(3)-C(4)-B(2)    | 112.20(15) |
| C(5)-C(4)-B(2)    | 108.40(16) |
| C(3)-C(4)-H(4)    | 108.7      |
| C(5)-C(4)-H(4)    | 108.7      |
| B(2)-C(4)-H(4)    | 108.7      |
| C(4)-C(5)-B(1)    | 116.36(15) |
| C(4)-C(5)-H(5A)   | 108.2      |
| B(1)-C(5)-H(5A)   | 108.2      |
| C(4)-C(5)-H(5B)   | 108.2      |
| B(1)-C(5)-H(5B)   | 108.2      |
| H(5A)-C(5)-H(5B)  | 107.4      |
| C(7)-C(6)-N(1)    | 122.42(19) |
| C(7)-C(6)-C(15)   | 120.20(18) |
| N(1)-C(6)-C(15)   | 117.38(18) |
| C(6)-C(7)-C(8)    | 119.9(2)   |
| C(6)-C(7)-H(7)    | 120.0      |
| C(8)-C(7)-H(7)    | 120.0      |
| C(9)-C(8)-C(7)    | 121.5(2)   |
| C(9)-C(8)-H(8)    | 119.3      |
| C(7)-C(8)-H(8)    | 119.3      |
| C(8)-C(9)-C(10)   | 120.47(19) |
| C(8)-C(9)-H(9)    | 119.8      |
| C(10)-C(9)-H(9)   | 119.8      |
| C(11)-C(10)-C(9)  | 122.72(19) |
| C(11)-C(10)-C(15) | 118.8(2)   |
| C(9)-C(10)-C(15)  | 118.47(19) |

|                    |            |
|--------------------|------------|
| C(12)-C(11)-C(10)  | 120.4(2)   |
| C(12)-C(11)-H(11)  | 119.8      |
| C(10)-C(11)-H(11)  | 119.8      |
| C(11)-C(12)-C(13)  | 121.5(2)   |
| C(11)-C(12)-H(12)  | 119.3      |
| C(13)-C(12)-H(12)  | 119.3      |
| C(14)-C(13)-C(12)  | 120.1(2)   |
| C(14)-C(13)-H(13)  | 119.9      |
| C(12)-C(13)-H(13)  | 119.9      |
| C(13)-C(14)-N(2)   | 122.34(19) |
| C(13)-C(14)-C(15)  | 119.70(18) |
| N(2)-C(14)-C(15)   | 117.96(18) |
| C(6)-C(15)-C(10)   | 119.43(18) |
| C(6)-C(15)-C(14)   | 121.10(17) |
| C(10)-C(15)-C(14)  | 119.47(18) |
| C(21X)-C(16)-C(17) | 116.7(3)   |
| C(17)-C(16)-C(21)  | 113.9(3)   |
| C(21X)-C(16)-C(2)  | 119.3(3)   |
| C(17)-C(16)-C(2)   | 122.01(17) |
| C(21)-C(16)-C(2)   | 123.0(2)   |
| C(16)-C(17)-C(18)  | 122.1(2)   |
| C(16)-C(17)-H(17)  | 118.9      |
| C(18)-C(17)-H(17)  | 118.9      |
| C(19)-C(18)-C(17)  | 120.6(2)   |
| C(19)-C(18)-H(18)  | 119.7      |
| C(17)-C(18)-H(18)  | 119.7      |
| C(18)-C(19)-C(20)  | 118.8(4)   |
| C(18)-C(19)-C(20X) | 115.1(5)   |
| C(18)-C(19)-H(19)  | 120.6      |
| C(20)-C(19)-H(19)  | 120.6      |
| C(19)-C(20)-C(21)  | 119.4(6)   |
| C(19)-C(20)-H(20)  | 120.3      |
| C(21)-C(20)-H(20)  | 120.3      |
| C(20)-C(21)-C(16)  | 123.0(4)   |
| C(20)-C(21)-H(21)  | 118.5      |
| C(16)-C(21)-H(21)  | 118.5      |

|                      |            |
|----------------------|------------|
| C(21X)-C(20X)-C(19)  | 121.1(8)   |
| C(21X)-C(20X)-H(20X) | 119.4      |
| C(19)-C(20X)-H(20X)  | 119.4      |
| C(16)-C(21X)-C(20X)  | 119.6(6)   |
| C(16)-C(21X)-H(21X)  | 120.2      |
| C(20X)-C(21X)-H(21X) | 120.2      |
| O(1)-C(22)-C(25)     | 109.28(17) |
| O(1)-C(22)-C(24)     | 105.79(17) |
| C(25)-C(22)-C(24)    | 110.2(2)   |
| O(1)-C(22)-C(23)     | 100.97(16) |
| C(25)-C(22)-C(23)    | 115.30(19) |
| C(24)-C(22)-C(23)    | 114.4(2)   |
| O(2)-C(23)-C(26)     | 106.24(19) |
| O(2)-C(23)-C(27)     | 108.5(2)   |
| C(26)-C(23)-C(27)    | 111.2(2)   |
| O(2)-C(23)-C(22)     | 102.45(15) |
| C(26)-C(23)-C(22)    | 113.3(2)   |
| C(27)-C(23)-C(22)    | 114.3(2)   |
| C(22)-C(24)-H(24A)   | 109.5      |
| C(22)-C(24)-H(24B)   | 109.5      |
| H(24A)-C(24)-H(24B)  | 109.5      |
| C(22)-C(24)-H(24C)   | 109.5      |
| H(24A)-C(24)-H(24C)  | 109.5      |
| H(24B)-C(24)-H(24C)  | 109.5      |
| C(22)-C(25)-H(25A)   | 109.5      |
| C(22)-C(25)-H(25B)   | 109.5      |
| H(25A)-C(25)-H(25B)  | 109.5      |
| C(22)-C(25)-H(25C)   | 109.5      |
| H(25A)-C(25)-H(25C)  | 109.5      |
| H(25B)-C(25)-H(25C)  | 109.5      |
| C(23)-C(26)-H(26A)   | 109.5      |
| C(23)-C(26)-H(26B)   | 109.5      |
| H(26A)-C(26)-H(26B)  | 109.5      |
| C(23)-C(26)-H(26C)   | 109.5      |
| H(26A)-C(26)-H(26C)  | 109.5      |
| H(26B)-C(26)-H(26C)  | 109.5      |

|                     |       |
|---------------------|-------|
| C(23)-C(27)-H(27A)  | 109.5 |
| C(23)-C(27)-H(27B)  | 109.5 |
| H(27A)-C(27)-H(27B) | 109.5 |
| C(23)-C(27)-H(27C)  | 109.5 |
| H(27A)-C(27)-H(27C) | 109.5 |
| H(27B)-C(27)-H(27C) | 109.5 |

---

Symmetry transformations used to generate equivalent atoms:

**Table S4. Anisotropic displacement parameters ( $\text{\AA}^2 \times 10^3$ ) for  $\text{C}_{27}\text{H}_{32}\text{B}_2\text{N}_2\text{O}_2$ . The anisotropic displacement factor exponent takes the form:  $-2p^2[h^2 a^*U^{11} + \dots + 2 h k a^* b^* U^{12}]$**

|       | $U^{11}$ | $U^{22}$ | $U^{33}$ | $U^{23}$ | $U^{13}$ | $U^{12}$ |
|-------|----------|----------|----------|----------|----------|----------|
| O(1)  | 48(1)    | 40(1)    | 27(1)    | 3(1)     | 9(1)     | -11(1)   |
| O(2)  | 53(1)    | 49(1)    | 24(1)    | 3(1)     | 3(1)     | -14(1)   |
| N(1)  | 28(1)    | 36(1)    | 37(1)    | 1(1)     | 3(1)     | 7(1)     |
| N(2)  | 31(1)    | 32(1)    | 31(1)    | 2(1)     | 2(1)     | -1(1)    |
| B(1)  | 25(1)    | 32(1)    | 34(1)    | 4(1)     | 5(1)     | -5(1)    |
| B(2)  | 22(1)    | 36(1)    | 27(1)    | 0(1)     | -1(1)    | 4(1)     |
| C(1)  | 48(1)    | 56(2)    | 31(1)    | -2(1)    | 0(1)     | 20(1)    |
| C(2)  | 30(1)    | 30(1)    | 28(1)    | -4(1)    | -1(1)    | -2(1)    |
| C(3)  | 27(1)    | 31(1)    | 25(1)    | 2(1)     | 0(1)     | -2(1)    |
| C(4)  | 27(1)    | 31(1)    | 25(1)    | -2(1)    | -1(1)    | 2(1)     |
| C(5)  | 29(1)    | 34(1)    | 29(1)    | 1(1)     | 4(1)     | -2(1)    |
| C(6)  | 26(1)    | 37(1)    | 32(1)    | 9(1)     | 6(1)     | 0(1)     |
| C(7)  | 35(1)    | 48(1)    | 35(1)    | 4(1)     | 6(1)     | 3(1)     |
| C(8)  | 38(1)    | 62(2)    | 30(1)    | 7(1)     | 6(1)     | -3(1)    |
| C(9)  | 30(1)    | 61(2)    | 36(1)    | 23(1)    | 1(1)     | 1(1)     |
| C(10) | 25(1)    | 39(1)    | 43(1)    | 17(1)    | 8(1)     | -2(1)    |
| C(11) | 29(1)    | 40(1)    | 61(1)    | 22(1)    | 8(1)     | 4(1)     |
| C(12) | 34(1)    | 32(1)    | 70(2)    | 10(1)    | 13(1)    | 5(1)     |
| C(13) | 35(1)    | 33(1)    | 51(1)    | 1(1)     | 9(1)     | -2(1)    |
| C(14) | 24(1)    | 31(1)    | 40(1)    | 9(1)     | 5(1)     | -4(1)    |
| C(15) | 24(1)    | 31(1)    | 35(1)    | 11(1)    | 8(1)     | -2(1)    |
| C(16) | 29(1)    | 29(1)    | 30(1)    | -4(1)    | -3(1)    | -2(1)    |

|        |        |       |       |        |        |        |
|--------|--------|-------|-------|--------|--------|--------|
| C(17)  | 46(1)  | 41(1) | 32(1) | 4(1)   | 4(1)   | 14(1)  |
| C(18)  | 49(1)  | 39(1) | 32(1) | 5(1)   | -3(1)  | 5(1)   |
| C(19)  | 37(1)  | 58(2) | 44(1) | 2(1)   | -9(1)  | 10(1)  |
| C(20)  | 43(4)  | 53(5) | 61(3) | -3(4)  | -6(3)  | 20(3)  |
| C(21)  | 47(3)  | 40(4) | 39(2) | -11(2) | -3(2)  | 10(3)  |
| C(20X) | 34(4)  | 52(7) | 43(4) | 0(4)   | -1(3)  | 12(4)  |
| C(22)  | 38(1)  | 41(1) | 32(1) | 9(1)   | 9(1)   | -4(1)  |
| C(23)  | 56(1)  | 49(2) | 28(1) | 10(1)  | 3(1)   | -13(1) |
| C(24)  | 33(1)  | 62(2) | 99(2) | 33(2)  | 11(1)  | -2(1)  |
| C(25)  | 78(2)  | 46(2) | 50(1) | 0(1)   | 21(1)  | -16(1) |
| C(26)  | 62(2)  | 92(2) | 99(2) | 65(2)  | -20(2) | -5(2)  |
| C(27)  | 144(3) | 91(2) | 42(2) | -11(2) | 45(2)  | -58(2) |

**Table S5. Hydrogen coordinates ( $\times 10^4$ ) and isotropic displacement parameters ( $\text{\AA}^2 \times 10^3$ ) for  $\text{C}_{27}\text{H}_{32}\text{B}_2\text{N}_2\text{O}_2$ .**

|       | x        | y        | z        | U(eq) |
|-------|----------|----------|----------|-------|
| H(1N) | 6450(20) | 7600(30) | 6640(11) | 45(7) |
| H(2N) | 6986(19) | 4950(20) | 5276(12) | 44(7) |
| H(1A) | 2143     | 10188    | 6039     | 54    |
| H(1B) | 3256     | 9216     | 6248     | 54    |
| H(3A) | 4324     | 9181     | 4827     | 34    |
| H(3B) | 3504     | 7887     | 4778     | 34    |
| H(4)  | 4958     | 8604     | 5934     | 34    |
| H(5A) | 6005     | 7800     | 5075     | 37    |
| H(5B) | 5267     | 6437     | 5028     | 37    |
| H(7)  | 7557     | 7686     | 7672     | 47    |
| H(8)  | 9082     | 6773     | 8353     | 52    |
| H(9)  | 10057    | 4894     | 8046     | 51    |
| H(11) | 10304    | 3055     | 7217     | 52    |
| H(12) | 9828     | 2171     | 6191     | 54    |
| H(13) | 8423     | 3186     | 5461     | 47    |
| H(17) | 2782     | 9313     | 3996     | 47    |



|        |      |       |      |     |
|--------|------|-------|------|-----|
| H(18)  | 1557 | 10336 | 3187 | 48  |
| H(19)  | 47   | 11647 | 3466 | 57  |
| H(20)  | 190  | 12558 | 4522 | 64  |
| H(21)  | 1337 | 11480 | 5339 | 51  |
| H(20X) | -363 | 11600 | 4554 | 52  |
| H(21X) | 907  | 10623 | 5370 | 38  |
| H(24A) | 1643 | 6800  | 6219 | 97  |
| H(24B) | 1084 | 5430  | 6460 | 97  |
| H(24C) | 1178 | 5670  | 5699 | 97  |
| H(25A) | 2138 | 3528  | 5643 | 85  |
| H(25B) | 2201 | 3218  | 6408 | 85  |
| H(25C) | 3345 | 3254  | 6052 | 85  |
| H(26A) | 4864 | 4441  | 6598 | 129 |
| H(26B) | 4182 | 3665  | 7119 | 129 |
| H(26C) | 4987 | 4926  | 7343 | 129 |
| H(27A) | 3353 | 5922  | 7811 | 135 |
| H(27B) | 2400 | 4875  | 7511 | 135 |
| H(27C) | 2273 | 6462  | 7348 | 135 |

---

**Table S6.** Torsion angles [°] for  $C_{27}H_{32}B_2N_2O_2$ .

|                      |             |
|----------------------|-------------|
| C(14)-N(2)-B(1)-N(1) | -3.0(3)     |
| C(14)-N(2)-B(1)-C(5) | 176.25(17)  |
| C(6)-N(1)-B(1)-N(2)  | 5.5(3)      |
| C(6)-N(1)-B(1)-C(5)  | -173.80(17) |
| C(23)-O(2)-B(2)-O(1) | 10.6(2)     |
| C(23)-O(2)-B(2)-C(4) | -166.82(19) |
| C(22)-O(1)-B(2)-O(2) | 10.8(2)     |
| C(22)-O(1)-B(2)-C(4) | -171.68(17) |
| C(1)-C(2)-C(3)-C(4)  | 2.2(3)      |
| C(16)-C(2)-C(3)-C(4) | -178.09(16) |
| C(2)-C(3)-C(4)-C(5)  | -175.95(16) |
| C(2)-C(3)-C(4)-B(2)  | 63.2(2)     |
| O(2)-B(2)-C(4)-C(3)  | -126.9(2)   |

|                         |             |
|-------------------------|-------------|
| O(1)-B(2)-C(4)-C(3)     | 55.9(2)     |
| O(2)-B(2)-C(4)-C(5)     | 111.2(2)    |
| O(1)-B(2)-C(4)-C(5)     | -66.0(2)    |
| C(3)-C(4)-C(5)-B(1)     | 176.79(16)  |
| B(2)-C(4)-C(5)-B(1)     | -60.1(2)    |
| N(2)-B(1)-C(5)-C(4)     | 152.57(18)  |
| N(1)-B(1)-C(5)-C(4)     | -28.2(3)    |
| B(1)-N(1)-C(6)-C(7)     | 174.35(19)  |
| B(1)-N(1)-C(6)-C(15)    | -4.6(3)     |
| N(1)-C(6)-C(7)-C(8)     | -178.55(18) |
| C(15)-C(6)-C(7)-C(8)    | 0.4(3)      |
| C(6)-C(7)-C(8)-C(9)     | -1.6(3)     |
| C(7)-C(8)-C(9)-C(10)    | 0.7(3)      |
| C(8)-C(9)-C(10)-C(11)   | -178.87(19) |
| C(8)-C(9)-C(10)-C(15)   | 1.4(3)      |
| C(9)-C(10)-C(11)-C(12)  | -177.49(19) |
| C(15)-C(10)-C(11)-C(12) | 2.2(3)      |
| C(10)-C(11)-C(12)-C(13) | 0.0(3)      |
| C(11)-C(12)-C(13)-C(14) | -1.8(3)     |
| C(12)-C(13)-C(14)-N(2)  | -179.24(18) |
| C(12)-C(13)-C(14)-C(15) | 1.1(3)      |
| B(1)-N(2)-C(14)-C(13)   | -179.67(18) |
| B(1)-N(2)-C(14)-C(15)   | 0.0(3)      |
| C(7)-C(6)-C(15)-C(10)   | 1.8(3)      |
| N(1)-C(6)-C(15)-C(10)   | -179.25(16) |
| C(7)-C(6)-C(15)-C(14)   | -177.83(18) |
| N(1)-C(6)-C(15)-C(14)   | 1.1(3)      |
| C(11)-C(10)-C(15)-C(6)  | 177.64(17)  |
| C(9)-C(10)-C(15)-C(6)   | -2.7(3)     |
| C(11)-C(10)-C(15)-C(14) | -2.7(3)     |
| C(9)-C(10)-C(15)-C(14)  | 176.96(17)  |
| C(13)-C(14)-C(15)-C(6)  | -179.30(17) |
| N(2)-C(14)-C(15)-C(6)   | 1.1(3)      |
| C(13)-C(14)-C(15)-C(10) | 1.1(3)      |
| N(2)-C(14)-C(15)-C(10)  | -178.54(16) |
| C(1)-C(2)-C(16)-C(21X)  | -14.0(7)    |

|                           |             |
|---------------------------|-------------|
| C(3)-C(2)-C(16)-C(21X)    | 166.4(6)    |
| C(1)-C(2)-C(16)-C(17)     | -177.4(2)   |
| C(3)-C(2)-C(16)-C(17)     | 2.9(3)      |
| C(1)-C(2)-C(16)-C(21)     | 15.3(7)     |
| C(3)-C(2)-C(16)-C(21)     | -164.4(6)   |
| C(21X)-C(16)-C(17)-C(18)  | 16.6(7)     |
| C(21)-C(16)-C(17)-C(18)   | -11.2(6)    |
| C(2)-C(16)-C(17)-C(18)    | -179.6(2)   |
| C(16)-C(17)-C(18)-C(19)   | 0.7(4)      |
| C(17)-C(18)-C(19)-C(20)   | 12.4(7)     |
| C(17)-C(18)-C(19)-C(20X)  | -18.0(8)    |
| C(18)-C(19)-C(20)-C(21)   | -13.9(9)    |
| C(19)-C(20)-C(21)-C(16)   | 2.6(8)      |
| C(17)-C(16)-C(21)-C(20)   | 9.6(8)      |
| C(2)-C(16)-C(21)-C(20)    | 177.9(4)    |
| C(18)-C(19)-C(20X)-C(21X) | 19.2(12)    |
| C(17)-C(16)-C(21X)-C(20X) | -15.0(8)    |
| C(2)-C(16)-C(21X)-C(20X)  | -179.3(5)   |
| C(19)-C(20X)-C(21X)-C(16) | -2.6(11)    |
| B(2)-O(1)-C(22)-C(25)     | -147.90(19) |
| B(2)-O(1)-C(22)-C(24)     | 93.5(2)     |
| B(2)-O(1)-C(22)-C(23)     | -26.0(2)    |
| B(2)-O(2)-C(23)-C(26)     | 92.9(2)     |
| B(2)-O(2)-C(23)-C(27)     | -147.5(2)   |
| B(2)-O(2)-C(23)-C(22)     | -26.2(2)    |
| O(1)-C(22)-C(23)-O(2)     | 31.0(2)     |
| C(25)-C(22)-C(23)-O(2)    | 148.64(18)  |
| C(24)-C(22)-C(23)-O(2)    | -82.1(2)    |
| O(1)-C(22)-C(23)-C(26)    | -83.0(2)    |
| C(25)-C(22)-C(23)-C(26)   | 34.6(3)     |
| C(24)-C(22)-C(23)-C(26)   | 163.9(2)    |
| O(1)-C(22)-C(23)-C(27)    | 148.2(2)    |
| C(25)-C(22)-C(23)-C(27)   | -94.2(3)    |
| C(24)-C(22)-C(23)-C(27)   | 35.1(3)     |

---

Symmetry transformations used to generate equivalent atoms:

**Table S7. Hydrogen bonds for C<sub>27</sub>H<sub>32</sub>B<sub>2</sub>N<sub>2</sub>O<sub>2</sub> [Å and °].**

| D-H...A             | d(D-H)  | d(H...A) | d(D...A) | <(DHA) |
|---------------------|---------|----------|----------|--------|
| N(2)-H(2N)...O(1)#1 | 0.87(2) | 2.16(3)  | 3.026(2) | 177(2) |

Symmetry transformations used to generate equivalent atoms:

#1 -x+1,-y+1,-z+1

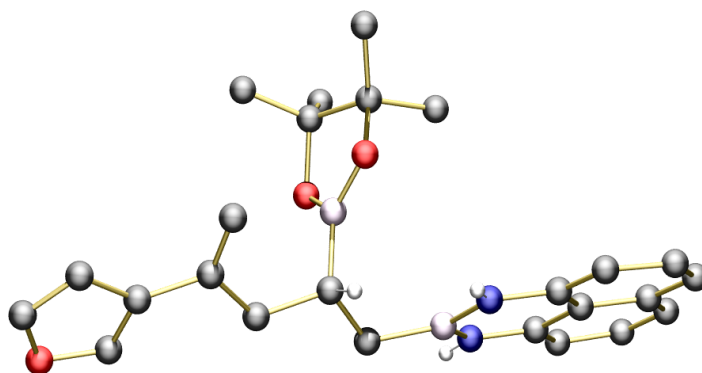**X-ray structure of 1f****Table S8. Crystal data and structure refinement for C<sub>25</sub>H<sub>30</sub>B<sub>2</sub>N<sub>2</sub>O<sub>3</sub>.**

|                      |                           |                 |
|----------------------|---------------------------|-----------------|
| Identification code  | C25H30B2N2O3              |                 |
| Empirical formula    | C25 H30 B2 N2 O3          |                 |
| Formula weight       | 428.13                    |                 |
| Temperature          | 100(2) K                  |                 |
| Wavelength           | 1.54178 Å                 |                 |
| Crystal system       | Monoclinic                |                 |
| Space group          | P2 <sub>1</sub> /n        |                 |
| Unit cell dimensions | a = 11.4630(2) Å          | α = 90°.        |
|                      | b = 9.8897(2) Å           | β = 98.190(2)°. |
|                      | c = 20.2832(4) Å          | γ = 90°.        |
| Volume               | 2275.97(8) Å <sup>3</sup> |                 |
| Z                    | 4                         |                 |
| Density (calculated) | 1.249 Mg/m <sup>3</sup>   |                 |

|                                   |                                             |
|-----------------------------------|---------------------------------------------|
| Absorption coefficient            | 0.634 mm <sup>-1</sup>                      |
| F(000)                            | 912                                         |
| Crystal size                      | 0.180 x 0.120 x 0.110 mm <sup>3</sup>       |
| Theta range for data collection   | 4.194 to 70.315°.                           |
| Index ranges                      | -13<=h<=13, -11<=k<=11, -24<=l<=18          |
| Reflections collected             | 9224                                        |
| Independent reflections           | 4102 [R(int) = 0.0431]                      |
| Completeness to theta = 67.679°   | 97.1 %                                      |
| Absorption correction             | Semi-empirical from equivalents             |
| Max. and min. transmission        | 0.7533 and 0.6406                           |
| Refinement method                 | Full-matrix least-squares on F <sup>2</sup> |
| Data / restraints / parameters    | 4102 / 2 / 299                              |
| Goodness-of-fit on F <sup>2</sup> | 1.040                                       |
| Final R indices [I>2sigma(I)]     | R1 = 0.0463, wR2 = 0.1142                   |
| R indices (all data)              | R1 = 0.0620, wR2 = 0.1228                   |
| Extinction coefficient            | n/a                                         |
| Largest diff. peak and hole       | 0.243 and -0.272 e. Å <sup>-3</sup>         |

**Table S9. Atomic coordinates (x10<sup>4</sup>) and equivalent isotropic displacement parameters (Å<sup>2</sup> x10<sup>3</sup>) for C<sub>25</sub>H<sub>30</sub>B<sub>2</sub>N<sub>2</sub>O<sub>3</sub>. U(eq) is defined as one third of the trace of the orthogonalized U<sup>ij</sup> tensor.**

|      | x       | y       | z       | U(eq) |
|------|---------|---------|---------|-------|
| O(1) | 8811(1) | -457(1) | 6521(1) | 32(1) |
| O(2) | 6287(1) | 2950(1) | 3410(1) | 26(1) |
| O(3) | 6699(1) | 4158(1) | 4371(1) | 24(1) |
| N(1) | 3143(1) | 2780(2) | 3502(1) | 23(1) |
| N(2) | 2878(1) | 4569(1) | 4269(1) | 22(1) |
| B(1) | 3473(2) | 3365(2) | 4143(1) | 21(1) |
| B(2) | 6169(2) | 3030(2) | 4066(1) | 21(1) |
| C(1) | 7503(2) | 212(2)  | 4259(1) | 29(1) |
| C(2) | 7284(1) | 472(2)  | 4873(1) | 23(1) |
| C(3) | 6252(1) | 1315(2) | 5031(1) | 22(1) |
| C(4) | 5472(1) | 1979(2) | 4443(1) | 20(1) |
| C(5) | 4420(1) | 2716(2) | 4691(1) | 21(1) |

|       |         |          |         |       |
|-------|---------|----------|---------|-------|
| C(6)  | 1990(1) | 5153(2)  | 3817(1) | 21(1) |
| C(7)  | 1424(2) | 6325(2)  | 3958(1) | 25(1) |
| C(8)  | 544(2)  | 6888(2)  | 3483(1) | 30(1) |
| C(9)  | 207(2)  | 6277(2)  | 2885(1) | 29(1) |
| C(10) | 746(1)  | 5052(2)  | 2723(1) | 24(1) |
| C(11) | 400(2)  | 4350(2)  | 2116(1) | 29(1) |
| C(12) | 958(2)  | 3176(2)  | 1983(1) | 31(1) |
| C(13) | 1887(2) | 2642(2)  | 2434(1) | 28(1) |
| C(14) | 2241(1) | 3286(2)  | 3029(1) | 22(1) |
| C(15) | 1664(1) | 4493(2)  | 3193(1) | 21(1) |
| C(16) | 8043(1) | -71(2)   | 5458(1) | 24(1) |
| C(17) | 9014(2) | -1007(2) | 5481(1) | 38(1) |
| C(18) | 9422(2) | -1190(2) | 6124(1) | 38(1) |
| C(19) | 7973(2) | 207(2)   | 6100(1) | 27(1) |
| C(20) | 6760(2) | 4247(2)  | 3226(1) | 26(1) |
| C(21) | 5699(2) | 5102(2)  | 2951(1) | 44(1) |
| C(22) | 7541(2) | 3997(2)  | 2693(1) | 42(1) |
| C(23) | 7412(2) | 4762(2)  | 3899(1) | 23(1) |
| C(24) | 7432(2) | 6286(2)  | 3983(1) | 37(1) |
| C(25) | 8645(2) | 4176(2)  | 4078(1) | 34(1) |

---

**Table S10.** Bond lengths [ $\text{\AA}$ ] and angles [ $^\circ$ ] for  $\text{C}_{25}\text{H}_{30}\text{B}_2\text{N}_2\text{O}_3$ .

|            |           |
|------------|-----------|
| O(1)-C(18) | 1.350(2)  |
| O(1)-C(19) | 1.360(2)  |
| O(2)-B(2)  | 1.359(2)  |
| O(2)-C(20) | 1.463(2)  |
| O(3)-B(2)  | 1.374(2)  |
| O(3)-C(23) | 1.471(2)  |
| N(1)-C(14) | 1.398(2)  |
| N(1)-B(1)  | 1.424(3)  |
| N(1)-H(1N) | 0.890(15) |
| N(2)-C(6)  | 1.395(2)  |
| N(2)-B(1)  | 1.414(2)  |

|             |           |
|-------------|-----------|
| N(2)-H(2N)  | 0.863(15) |
| B(1)-C(5)   | 1.575(2)  |
| B(2)-C(4)   | 1.573(2)  |
| C(1)-C(2)   | 1.330(3)  |
| C(1)-H(1A)  | 0.9500    |
| C(1)-H(1B)  | 0.9500    |
| C(2)-C(16)  | 1.469(3)  |
| C(2)-C(3)   | 1.517(2)  |
| C(3)-C(4)   | 1.533(2)  |
| C(3)-H(3A)  | 0.9900    |
| C(3)-H(3B)  | 0.9900    |
| C(4)-C(5)   | 1.553(2)  |
| C(4)-H(4)   | 1.0000    |
| C(5)-H(5A)  | 0.9900    |
| C(5)-H(5B)  | 0.9900    |
| C(6)-C(7)   | 1.379(2)  |
| C(6)-C(15)  | 1.425(3)  |
| C(7)-C(8)   | 1.406(3)  |
| C(7)-H(7)   | 0.9500    |
| C(8)-C(9)   | 1.362(3)  |
| C(8)-H(8)   | 0.9500    |
| C(9)-C(10)  | 1.420(3)  |
| C(9)-H(9)   | 0.9500    |
| C(10)-C(11) | 1.418(3)  |
| C(10)-C(15) | 1.426(2)  |
| C(11)-C(12) | 1.371(3)  |
| C(11)-H(11) | 0.9500    |
| C(12)-C(13) | 1.404(3)  |
| C(12)-H(12) | 0.9500    |
| C(13)-C(14) | 1.375(3)  |
| C(13)-H(13) | 0.9500    |
| C(14)-C(15) | 1.427(2)  |
| C(16)-C(19) | 1.345(3)  |
| C(16)-C(17) | 1.443(2)  |
| C(17)-C(18) | 1.334(3)  |
| C(17)-H(17) | 0.9500    |

|              |          |
|--------------|----------|
| C(18)-H(18)  | 0.9500   |
| C(19)-H(19)  | 0.9500   |
| C(20)-C(22)  | 1.519(3) |
| C(20)-C(21)  | 1.520(3) |
| C(20)-C(23)  | 1.546(3) |
| C(21)-H(21A) | 0.9800   |
| C(21)-H(21B) | 0.9800   |
| C(21)-H(21C) | 0.9800   |
| C(22)-H(22A) | 0.9800   |
| C(22)-H(22B) | 0.9800   |
| C(22)-H(22C) | 0.9800   |
| C(23)-C(24)  | 1.517(2) |
| C(23)-C(25)  | 1.523(2) |
| C(24)-H(24A) | 0.9800   |
| C(24)-H(24B) | 0.9800   |
| C(24)-H(24C) | 0.9800   |
| C(25)-H(25A) | 0.9800   |
| C(25)-H(25B) | 0.9800   |
| C(25)-H(25C) | 0.9800   |

|                  |            |
|------------------|------------|
| C(18)-O(1)-C(19) | 105.42(15) |
| B(2)-O(2)-C(20)  | 106.95(13) |
| B(2)-O(3)-C(23)  | 106.76(13) |
| C(14)-N(1)-B(1)  | 123.73(15) |
| C(14)-N(1)-H(1N) | 113.6(14)  |
| B(1)-N(1)-H(1N)  | 122.4(14)  |
| C(6)-N(2)-B(1)   | 123.72(15) |
| C(6)-N(2)-H(2N)  | 115.4(14)  |
| B(1)-N(2)-H(2N)  | 120.9(14)  |
| N(2)-B(1)-N(1)   | 115.77(16) |
| N(2)-B(1)-C(5)   | 121.10(16) |
| N(1)-B(1)-C(5)   | 123.12(15) |
| O(2)-B(2)-O(3)   | 112.85(15) |
| O(2)-B(2)-C(4)   | 124.37(15) |
| O(3)-B(2)-C(4)   | 122.75(16) |
| C(2)-C(1)-H(1A)  | 120.0      |



|                  |            |
|------------------|------------|
| C(2)-C(1)-H(1B)  | 120.0      |
| H(1A)-C(1)-H(1B) | 120.0      |
| C(1)-C(2)-C(16)  | 121.04(16) |
| C(1)-C(2)-C(3)   | 124.08(16) |
| C(16)-C(2)-C(3)  | 114.88(15) |
| C(2)-C(3)-C(4)   | 117.20(15) |
| C(2)-C(3)-H(3A)  | 108.0      |
| C(4)-C(3)-H(3A)  | 108.0      |
| C(2)-C(3)-H(3B)  | 108.0      |
| C(4)-C(3)-H(3B)  | 108.0      |
| H(3A)-C(3)-H(3B) | 107.2      |
| C(3)-C(4)-C(5)   | 110.03(14) |
| C(3)-C(4)-B(2)   | 112.32(13) |
| C(5)-C(4)-B(2)   | 108.59(13) |
| C(3)-C(4)-H(4)   | 108.6      |
| C(5)-C(4)-H(4)   | 108.6      |
| B(2)-C(4)-H(4)   | 108.6      |
| C(4)-C(5)-B(1)   | 116.76(14) |
| C(4)-C(5)-H(5A)  | 108.1      |
| B(1)-C(5)-H(5A)  | 108.1      |
| C(4)-C(5)-H(5B)  | 108.1      |
| B(1)-C(5)-H(5B)  | 108.1      |
| H(5A)-C(5)-H(5B) | 107.3      |
| C(7)-C(6)-N(2)   | 122.13(16) |
| C(7)-C(6)-C(15)  | 119.88(16) |
| N(2)-C(6)-C(15)  | 117.99(15) |
| C(6)-C(7)-C(8)   | 120.16(17) |
| C(6)-C(7)-H(7)   | 119.9      |
| C(8)-C(7)-H(7)   | 119.9      |
| C(9)-C(8)-C(7)   | 121.37(17) |
| C(9)-C(8)-H(8)   | 119.3      |
| C(7)-C(8)-H(8)   | 119.3      |
| C(8)-C(9)-C(10)  | 120.44(16) |
| C(8)-C(9)-H(9)   | 119.8      |
| C(10)-C(9)-H(9)  | 119.8      |
| C(11)-C(10)-C(9) | 122.75(16) |

|                    |            |
|--------------------|------------|
| C(11)-C(10)-C(15)  | 118.57(16) |
| C(9)-C(10)-C(15)   | 118.68(16) |
| C(12)-C(11)-C(10)  | 120.31(16) |
| C(12)-C(11)-H(11)  | 119.8      |
| C(10)-C(11)-H(11)  | 119.8      |
| C(11)-C(12)-C(13)  | 121.50(17) |
| C(11)-C(12)-H(12)  | 119.2      |
| C(13)-C(12)-H(12)  | 119.2      |
| C(14)-C(13)-C(12)  | 119.94(17) |
| C(14)-C(13)-H(13)  | 120.0      |
| C(12)-C(13)-H(13)  | 120.0      |
| C(13)-C(14)-N(1)   | 122.25(16) |
| C(13)-C(14)-C(15)  | 120.21(16) |
| N(1)-C(14)-C(15)   | 117.52(15) |
| C(6)-C(15)-C(10)   | 119.43(15) |
| C(6)-C(15)-C(14)   | 121.16(15) |
| C(10)-C(15)-C(14)  | 119.41(16) |
| C(19)-C(16)-C(17)  | 104.53(17) |
| C(19)-C(16)-C(2)   | 126.63(16) |
| C(17)-C(16)-C(2)   | 128.84(18) |
| C(18)-C(17)-C(16)  | 106.36(18) |
| C(18)-C(17)-H(17)  | 126.8      |
| C(16)-C(17)-H(17)  | 126.8      |
| C(17)-C(18)-O(1)   | 111.69(17) |
| C(17)-C(18)-H(18)  | 124.2      |
| O(1)-C(18)-H(18)   | 124.2      |
| C(16)-C(19)-O(1)   | 111.99(16) |
| C(16)-C(19)-H(19)  | 124.0      |
| O(1)-C(19)-H(19)   | 124.0      |
| O(2)-C(20)-C(22)   | 108.47(15) |
| O(2)-C(20)-C(21)   | 105.99(14) |
| C(22)-C(20)-C(21)  | 110.59(18) |
| O(2)-C(20)-C(23)   | 102.30(13) |
| C(22)-C(20)-C(23)  | 114.99(15) |
| C(21)-C(20)-C(23)  | 113.64(17) |
| C(20)-C(21)-H(21A) | 109.5      |

|                     |            |
|---------------------|------------|
| C(20)-C(21)-H(21B)  | 109.5      |
| H(21A)-C(21)-H(21B) | 109.5      |
| C(20)-C(21)-H(21C)  | 109.5      |
| H(21A)-C(21)-H(21C) | 109.5      |
| H(21B)-C(21)-H(21C) | 109.5      |
| C(20)-C(22)-H(22A)  | 109.5      |
| C(20)-C(22)-H(22B)  | 109.5      |
| H(22A)-C(22)-H(22B) | 109.5      |
| C(20)-C(22)-H(22C)  | 109.5      |
| H(22A)-C(22)-H(22C) | 109.5      |
| H(22B)-C(22)-H(22C) | 109.5      |
| O(3)-C(23)-C(24)    | 109.37(15) |
| O(3)-C(23)-C(25)    | 105.89(14) |
| C(24)-C(23)-C(25)   | 110.69(16) |
| O(3)-C(23)-C(20)    | 101.39(13) |
| C(24)-C(23)-C(20)   | 115.07(16) |
| C(25)-C(23)-C(20)   | 113.54(15) |
| C(23)-C(24)-H(24A)  | 109.5      |
| C(23)-C(24)-H(24B)  | 109.5      |
| H(24A)-C(24)-H(24B) | 109.5      |
| C(23)-C(24)-H(24C)  | 109.5      |
| H(24A)-C(24)-H(24C) | 109.5      |
| H(24B)-C(24)-H(24C) | 109.5      |
| C(23)-C(25)-H(25A)  | 109.5      |
| C(23)-C(25)-H(25B)  | 109.5      |
| H(25A)-C(25)-H(25B) | 109.5      |
| C(23)-C(25)-H(25C)  | 109.5      |
| H(25A)-C(25)-H(25C) | 109.5      |
| H(25B)-C(25)-H(25C) | 109.5      |

---

Symmetry transformations used to generate equivalent atoms:

**Table S11.** Anisotropic displacement parameters ( $\text{\AA}^2 \times 10^3$ ) for  $\text{C}_{25}\text{H}_{30}\text{B}_2\text{N}_2\text{O}_3$ . The anisotropic displacement factor exponent takes the form:  $-2p^2[h^2 a^* U^{11} + \dots + 2 h k a^* b^* U^{12}]$ .

|       | $U^{11}$ | $U^{22}$ | $U^{33}$ | $U^{23}$ | $U^{13}$ | $U^{12}$ |
|-------|----------|----------|----------|----------|----------|----------|
| O(1)  | 31(1)    | 30(1)    | 31(1)    | 6(1)     | -4(1)    | 2(1)     |
| O(2)  | 29(1)    | 27(1)    | 21(1)    | -1(1)    | 2(1)     | -8(1)    |
| O(3)  | 28(1)    | 26(1)    | 19(1)    | 0(1)     | 5(1)     | -7(1)    |
| N(1)  | 21(1)    | 24(1)    | 25(1)    | 0(1)     | 2(1)     | 4(1)     |
| N(2)  | 21(1)    | 23(1)    | 19(1)    | 0(1)     | -2(1)    | 0(1)     |
| B(1)  | 18(1)    | 22(1)    | 24(1)    | 3(1)     | 4(1)     | -4(1)    |
| B(2)  | 16(1)    | 23(1)    | 22(1)    | -1(1)    | -2(1)    | 2(1)     |
| C(1)  | 27(1)    | 29(1)    | 30(1)    | 0(1)     | 2(1)     | 2(1)     |
| C(2)  | 21(1)    | 20(1)    | 29(1)    | 1(1)     | 1(1)     | -3(1)    |
| C(3)  | 20(1)    | 23(1)    | 23(1)    | 2(1)     | 1(1)     | -2(1)    |
| C(4)  | 19(1)    | 20(1)    | 20(1)    | -2(1)    | -1(1)    | 0(1)     |
| C(5)  | 19(1)    | 23(1)    | 22(1)    | 1(1)     | 3(1)     | -1(1)    |
| C(6)  | 17(1)    | 21(1)    | 25(1)    | 7(1)     | 2(1)     | -3(1)    |
| C(7)  | 25(1)    | 20(1)    | 30(1)    | 2(1)     | 1(1)     | -3(1)    |
| C(8)  | 24(1)    | 20(1)    | 44(1)    | 7(1)     | 3(1)     | 1(1)     |
| C(9)  | 21(1)    | 29(1)    | 35(1)    | 14(1)    | 0(1)     | 0(1)     |
| C(10) | 18(1)    | 29(1)    | 25(1)    | 11(1)    | 2(1)     | -4(1)    |
| C(11) | 21(1)    | 42(1)    | 23(1)    | 11(1)    | -2(1)    | -3(1)    |
| C(12) | 29(1)    | 44(1)    | 19(1)    | 0(1)     | 2(1)     | -7(1)    |
| C(13) | 26(1)    | 33(1)    | 24(1)    | -2(1)    | 5(1)     | 0(1)     |
| C(14) | 18(1)    | 27(1)    | 21(1)    | 5(1)     | 4(1)     | -2(1)    |
| C(15) | 18(1)    | 23(1)    | 22(1)    | 7(1)     | 3(1)     | -4(1)    |
| C(16) | 20(1)    | 21(1)    | 31(1)    | 2(1)     | 3(1)     | -1(1)    |
| C(17) | 33(1)    | 42(1)    | 39(1)    | 2(1)     | 6(1)     | 14(1)    |
| C(18) | 29(1)    | 42(1)    | 42(1)    | 8(1)     | 2(1)     | 14(1)    |
| C(19) | 25(1)    | 23(1)    | 31(1)    | 2(1)     | -2(1)    | 2(1)     |
| C(20) | 29(1)    | 25(1)    | 22(1)    | 3(1)     | 2(1)     | -6(1)    |
| C(21) | 37(1)    | 44(1)    | 46(1)    | 22(1)    | -7(1)    | -3(1)    |
| C(22) | 54(1)    | 46(1)    | 26(1)    | -6(1)    | 14(1)    | -18(1)   |
| C(23) | 26(1)    | 24(1)    | 21(1)    | 1(1)     | 5(1)     | -5(1)    |

|       |       |       |       |       |       |       |
|-------|-------|-------|-------|-------|-------|-------|
| C(24) | 48(1) | 26(1) | 39(1) | -2(1) | 18(1) | -9(1) |
| C(25) | 22(1) | 40(1) | 39(1) | 10(1) | 1(1)  | -7(1) |

**Table S12. Hydrogen coordinates ( $\times 10^4$ ) and isotropic displacement parameters ( $\text{\AA}^2 \times 10^{-3}$ ) for  $\text{C}_{25}\text{H}_{30}\text{B}_2\text{N}_2\text{O}_3$ .**

|        | x        | y        | z        | U(eq) |
|--------|----------|----------|----------|-------|
| H(1N)  | 3456(18) | 2014(17) | 3379(10) | 28    |
| H(2N)  | 3036(18) | 4980(20) | 4646(8)  | 26    |
| H(1A)  | 8160     | -332     | 4193     | 35    |
| H(1B)  | 7003     | 571      | 3886     | 35    |
| H(3A)  | 6566     | 2038     | 5344     | 26    |
| H(3B)  | 5746     | 730      | 5267     | 26    |
| H(4)   | 5154     | 1257     | 4121     | 24    |
| H(5A)  | 4741     | 3441     | 5002     | 26    |
| H(5B)  | 4013     | 2062     | 4949     | 26    |
| H(7)   | 1628     | 6754     | 4378     | 30    |
| H(8)   | 178      | 7711     | 3582     | 36    |
| H(9)   | -393     | 6674     | 2573     | 34    |
| H(11)  | -220     | 4696     | 1801     | 35    |
| H(12)  | 710      | 2713     | 1577     | 37    |
| H(13)  | 2271     | 1836     | 2327     | 34    |
| H(17)  | 9305     | -1411    | 5112     | 45    |
| H(18)  | 10064    | -1767    | 6284     | 45    |
| H(19)  | 7405     | 797      | 6243     | 32    |
| H(21A) | 5229     | 4620     | 2583     | 66    |
| H(21B) | 5969     | 5965     | 2789     | 66    |
| H(21C) | 5216     | 5272     | 3304     | 66    |
| H(22A) | 8138     | 3317     | 2852     | 62    |
| H(22B) | 7931     | 4842     | 2598     | 62    |
| H(22C) | 7059     | 3670     | 2287     | 62    |
| H(24A) | 6622     | 6630     | 3931     | 55    |
| H(24B) | 7850     | 6696     | 3644     | 55    |
| H(24C) | 7836     | 6519     | 4427     | 55    |

|        |      |      |      |    |
|--------|------|------|------|----|
| H(25A) | 8962 | 4431 | 4535 | 52 |
| H(25B) | 9158 | 4531 | 3771 | 52 |
| H(25C) | 8608 | 3188 | 4041 | 52 |

**Table S13.** Torsion angles [°] for  $C_{25}H_{30}B_2N_2O_3$ .

|                         |             |
|-------------------------|-------------|
| C(6)-N(2)-B(1)-N(1)     | 2.2(2)      |
| C(6)-N(2)-B(1)-C(5)     | -176.55(14) |
| C(14)-N(1)-B(1)-N(2)    | -3.9(2)     |
| C(14)-N(1)-B(1)-C(5)    | 174.82(15)  |
| C(20)-O(2)-B(2)-O(3)    | -10.43(18)  |
| C(20)-O(2)-B(2)-C(4)    | 167.82(15)  |
| C(23)-O(3)-B(2)-O(2)    | -10.59(18)  |
| C(23)-O(3)-B(2)-C(4)    | 171.13(14)  |
| C(1)-C(2)-C(3)-C(4)     | -4.2(2)     |
| C(16)-C(2)-C(3)-C(4)    | 176.43(14)  |
| C(2)-C(3)-C(4)-C(5)     | 176.25(13)  |
| C(2)-C(3)-C(4)-B(2)     | -62.66(19)  |
| O(2)-B(2)-C(4)-C(3)     | 121.06(17)  |
| O(3)-B(2)-C(4)-C(3)     | -60.9(2)    |
| O(2)-B(2)-C(4)-C(5)     | -117.02(17) |
| O(3)-B(2)-C(4)-C(5)     | 61.1(2)     |
| C(3)-C(4)-C(5)-B(1)     | -175.56(14) |
| B(2)-C(4)-C(5)-B(1)     | 61.14(18)   |
| N(2)-B(1)-C(5)-C(4)     | -146.63(15) |
| N(1)-B(1)-C(5)-C(4)     | 34.7(2)     |
| B(1)-N(2)-C(6)-C(7)     | 179.63(15)  |
| B(1)-N(2)-C(6)-C(15)    | 0.1(2)      |
| N(2)-C(6)-C(7)-C(8)     | 179.08(15)  |
| C(15)-C(6)-C(7)-C(8)    | -1.4(2)     |
| C(6)-C(7)-C(8)-C(9)     | 1.9(3)      |
| C(7)-C(8)-C(9)-C(10)    | -0.4(3)     |
| C(8)-C(9)-C(10)-C(11)   | 177.80(17)  |
| C(8)-C(9)-C(10)-C(15)   | -1.5(2)     |
| C(9)-C(10)-C(11)-C(12)  | 179.44(16)  |
| C(15)-C(10)-C(11)-C(12) | -1.3(2)     |

|                         |             |
|-------------------------|-------------|
| C(10)-C(11)-C(12)-C(13) | -0.7(3)     |
| C(11)-C(12)-C(13)-C(14) | 1.2(3)      |
| C(12)-C(13)-C(14)-N(1)  | 178.53(15)  |
| C(12)-C(13)-C(14)-C(15) | 0.3(3)      |
| B(1)-N(1)-C(14)-C(13)   | -175.20(16) |
| B(1)-N(1)-C(14)-C(15)   | 3.1(2)      |
| C(7)-C(6)-C(15)-C(10)   | -0.5(2)     |
| N(2)-C(6)-C(15)-C(10)   | 179.03(14)  |
| C(7)-C(6)-C(15)-C(14)   | 179.42(15)  |
| N(2)-C(6)-C(15)-C(14)   | -1.1(2)     |
| C(11)-C(10)-C(15)-C(6)  | -177.40(15) |
| C(9)-C(10)-C(15)-C(6)   | 1.9(2)      |
| C(11)-C(10)-C(15)-C(14) | 2.7(2)      |
| C(9)-C(10)-C(15)-C(14)  | -177.98(14) |
| C(13)-C(14)-C(15)-C(6)  | 177.88(16)  |
| N(1)-C(14)-C(15)-C(6)   | -0.5(2)     |
| C(13)-C(14)-C(15)-C(10) | -2.2(2)     |
| N(1)-C(14)-C(15)-C(10)  | 179.42(14)  |
| C(1)-C(2)-C(16)-C(19)   | 174.13(18)  |
| C(3)-C(2)-C(16)-C(19)   | -6.5(2)     |
| C(1)-C(2)-C(16)-C(17)   | -6.0(3)     |
| C(3)-C(2)-C(16)-C(17)   | 173.32(18)  |
| C(19)-C(16)-C(17)-C(18) | -0.1(2)     |
| C(2)-C(16)-C(17)-C(18)  | -179.95(18) |
| C(16)-C(17)-C(18)-O(1)  | -0.3(2)     |
| C(19)-O(1)-C(18)-C(17)  | 0.6(2)      |
| C(17)-C(16)-C(19)-O(1)  | 0.4(2)      |
| C(2)-C(16)-C(19)-O(1)   | -179.68(15) |
| C(18)-O(1)-C(19)-C(16)  | -0.6(2)     |
| B(2)-O(2)-C(20)-C(22)   | 147.47(15)  |
| B(2)-O(2)-C(20)-C(21)   | -93.75(17)  |
| B(2)-O(2)-C(20)-C(23)   | 25.56(16)   |
| B(2)-O(3)-C(23)-C(24)   | 147.31(16)  |
| B(2)-O(3)-C(23)-C(25)   | -93.38(16)  |
| B(2)-O(3)-C(23)-C(20)   | 25.37(16)   |
| O(2)-C(20)-C(23)-O(3)   | -30.45(16)  |

|                         |             |
|-------------------------|-------------|
| C(22)-C(20)-C(23)-O(3)  | -147.80(16) |
| C(21)-C(20)-C(23)-O(3)  | 83.32(17)   |
| O(2)-C(20)-C(23)-C(24)  | -148.35(15) |
| C(22)-C(20)-C(23)-C(24) | 94.3(2)     |
| C(21)-C(20)-C(23)-C(24) | -34.6(2)    |
| O(2)-C(20)-C(23)-C(25)  | 82.65(17)   |
| C(22)-C(20)-C(23)-C(25) | -34.7(2)    |
| C(21)-C(20)-C(23)-C(25) | -163.58(16) |

---

Symmetry transformations used to generate equivalent atoms:

**Table S14. Hydrogen bonds for C<sub>25</sub>H<sub>30</sub>B<sub>2</sub>N<sub>2</sub>O<sub>3</sub> [Å and °].**

| D-H...A             | d(D-H)    | d(H...A)  | d(D...A)   | <(DHA)    |
|---------------------|-----------|-----------|------------|-----------|
| N(2)-H(2N)...O(3)#1 | 0.863(15) | 2.150(16) | 3.0082(19) | 173.5(19) |

---

Symmetry transformations used to generate equivalent atoms:

#1 -x+1,-y+1,-z+1



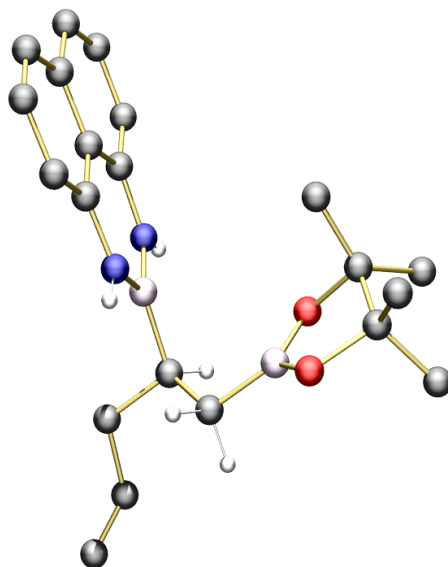

X-ray structure of 6

**Table S15. Crystal data and structure refinement for C<sub>21</sub>H<sub>28</sub>B<sub>2</sub>N<sub>2</sub>O<sub>2</sub>.**

|                                 |                                          |                  |
|---------------------------------|------------------------------------------|------------------|
| Identification code             | C21H28B2N2O2                             |                  |
| Empirical formula               | C21 H28 B2 N2 O2                         |                  |
| Formula weight                  | 362.07                                   |                  |
| Temperature                     | 100(2) K                                 |                  |
| Wavelength                      | 1.54178 Å                                |                  |
| Crystal system                  | Triclinic                                |                  |
| Space group                     | P-1                                      |                  |
| Unit cell dimensions            | a = 9.9787(12) Å                         | α = 100.956(8)°. |
|                                 | b = 10.6797(13) Å                        | β = 114.093(7)°. |
|                                 | c = 11.8681(15) Å                        | γ = 100.609(8)°. |
| Volume                          | 1084.2(2) Å <sup>3</sup>                 |                  |
| Z                               | 2                                        |                  |
| Density (calculated)            | 1.109 Mg/m <sup>3</sup>                  |                  |
| Absorption coefficient          | 0.543 mm <sup>-1</sup>                   |                  |
| F(000)                          | 388                                      |                  |
| Crystal size                    | 0.250 x 0.170 x 0.120 mm <sup>3</sup>    |                  |
| Theta range for data collection | 4.271 to 66.697°.                        |                  |
| Index ranges                    | -10 ≤ h ≤ 11, -12 ≤ k ≤ 12, -14 ≤ l ≤ 14 |                  |
| Reflections collected           | 9561                                     |                  |
| Independent reflections         | 3784 [R(int) = 0.0269]                   |                  |
| Completeness to theta = 66.697° | 98.8 %                                   |                  |

|                                   |                                             |
|-----------------------------------|---------------------------------------------|
| Absorption correction             | Semi-empirical from equivalents             |
| Max. and min. transmission        | 0.7528 and 0.6548                           |
| Refinement method                 | Full-matrix least-squares on F <sup>2</sup> |
| Data / restraints / parameters    | 3784 / 339 / 339                            |
| Goodness-of-fit on F <sup>2</sup> | 1.035                                       |
| Final R indices [I>2sigma(I)]     | R1 = 0.0521, wR2 = 0.1394                   |
| R indices (all data)              | R1 = 0.0794, wR2 = 0.1586                   |
| Extinction coefficient            | n/a                                         |
| Largest diff. peak and hole       | 0.155 and -0.158 e. Å <sup>-3</sup>         |

**Table S16. Atomic coordinates (x10<sup>4</sup>) and equivalent isotropic displacement parameters (Å<sup>2</sup> x10<sup>3</sup>) for C<sub>21</sub>H<sub>28</sub>B<sub>2</sub>N<sub>2</sub>O<sub>2</sub>. U(eq) is defined as one third of the trace of the orthogonalized U<sup>ij</sup> tensor.**

|       | x        | y        | z        | U(eq)   |
|-------|----------|----------|----------|---------|
| O(1)  | 3515(2)  | 1845(1)  | 5296(1)  | 68(1)   |
| N(1)  | 7339(2)  | 1370(2)  | 5886(2)  | 60(1)   |
| N(2)  | 7489(2)  | 3651(2)  | 5950(2)  | 61(1)   |
| B(1)  | 6735(3)  | 2284(2)  | 5258(2)  | 56(1)   |
| B(2)  | 3587(2)  | 2765(2)  | 4654(2)  | 56(1)   |
| C(1)  | 4721(8)  | 1701(8)  | 609(5)   | 163(3)  |
| C(2)  | 4792(6)  | 1117(6)  | 1472(4)  | 102(2)  |
| C(3)  | 5989(4)  | 1731(3)  | 2882(3)  | 61(1)   |
| C(1X) | 3370(40) | 70(50)   | 90(30)   | 330(20) |
| C(2X) | 3810(30) | 130(30)  | 1250(20) | 160(8)  |
| C(3X) | 5330(30) | 1300(30) | 2250(20) | 145(8)  |
| C(4)  | 5349(2)  | 1803(2)  | 3858(2)  | 62(1)   |
| C(5)  | 8599(2)  | 1749(2)  | 7107(2)  | 63(1)   |
| C(6)  | 9126(3)  | 830(3)   | 7711(2)  | 82(1)   |
| C(7)  | 10415(3) | 1256(3)  | 8918(3)  | 101(1)  |
| C(8)  | 11169(3) | 2566(4)  | 9520(3)  | 98(1)   |
| C(9)  | 10672(3) | 3551(3)  | 8943(2)  | 79(1)   |
| C(10) | 11408(3) | 4933(3)  | 9528(3)  | 97(1)   |
| C(11) | 10857(3) | 5842(3)  | 8968(3)  | 96(1)   |
| C(12) | 9538(3)  | 5440(2)  | 7776(2)  | 78(1)   |

|        |          |          |          |        |
|--------|----------|----------|----------|--------|
| C(13)  | 8795(2)  | 4102(2)  | 7151(2)  | 62(1)  |
| C(14)  | 9346(2)  | 3131(2)  | 7724(2)  | 62(1)  |
| C(15)  | 4243(2)  | 2675(2)  | 3673(2)  | 64(1)  |
| O(2)   | 2962(3)  | 3729(3)  | 4934(3)  | 70(1)  |
| C(16)  | 3122(4)  | 2406(4)  | 6314(5)  | 70(1)  |
| C(17)  | 2251(4)  | 3333(3)  | 5724(4)  | 76(1)  |
| C(18)  | 2264(6)  | 1316(5)  | 6612(5)  | 95(2)  |
| C(19)  | 4657(4)  | 3174(5)  | 7521(3)  | 117(2) |
| C(20)  | 2329(6)  | 4555(3)  | 6625(5)  | 111(1) |
| C(21)  | 536(3)   | 2562(5)  | 4773(4)  | 108(1) |
| O(2X)  | 3610(20) | 4020(20) | 5420(20) | 70(5)  |
| C(16X) | 3130(30) | 2280(20) | 6250(40) | 86(5)  |
| C(17X) | 2930(30) | 3640(20) | 6220(20) | 98(5)  |
| C(18X) | 1850(30) | 1140(30) | 6070(30) | 73(7)  |
| C(19X) | 4640(30) | 2320(40) | 7410(30) | 122(9) |
| C(20X) | 3540(50) | 4700(20) | 7430(30) | 127(8) |
| C(21X) | 1170(30) | 3520(30) | 5430(30) | 111(1) |

**Table S17. Bond lengths [Å] and angles [°] for C<sub>21</sub>H<sub>28</sub>B<sub>2</sub>N<sub>2</sub>O<sub>2</sub>.**

|            |          |
|------------|----------|
| O(1)-B(2)  | 1.362(2) |
| O(1)-C(16) | 1.473(5) |
| N(1)-C(5)  | 1.395(3) |
| N(1)-B(1)  | 1.412(3) |
| N(1)-H(1N) | 0.86(2)  |
| N(2)-C(13) | 1.398(3) |
| N(2)-B(1)  | 1.417(3) |
| N(2)-H(2N) | 0.83(2)  |
| B(1)-C(4)  | 1.574(3) |
| B(2)-O(2)  | 1.355(3) |
| B(2)-C(15) | 1.548(3) |
| C(1)-C(2)  | 1.281(6) |
| C(1)-H(1A) | 0.9500   |
| C(1)-H(1B) | 0.9500   |
| C(2)-C(3)  | 1.523(5) |

|              |          |
|--------------|----------|
| C(2)-H(2)    | 0.9500   |
| C(3)-C(4)    | 1.530(4) |
| C(3)-H(3A)   | 0.9900   |
| C(3)-H(3B)   | 0.9900   |
| C(4)-C(15)   | 1.547(3) |
| C(4)-H(4)    | 1.03(2)  |
| C(5)-C(6)    | 1.379(3) |
| C(5)-C(14)   | 1.418(3) |
| C(6)-C(7)    | 1.395(3) |
| C(6)-H(6)    | 0.9500   |
| C(7)-C(8)    | 1.352(4) |
| C(7)-H(7)    | 0.9500   |
| C(8)-C(9)    | 1.417(4) |
| C(8)-H(8)    | 0.9500   |
| C(9)-C(10)   | 1.412(4) |
| C(9)-C(14)   | 1.420(3) |
| C(10)-C(11)  | 1.354(4) |
| C(10)-H(10)  | 0.9500   |
| C(11)-C(12)  | 1.400(3) |
| C(11)-H(11)  | 0.9500   |
| C(12)-C(13)  | 1.379(3) |
| C(12)-H(12)  | 0.9500   |
| C(13)-C(14)  | 1.418(3) |
| C(15)-H(15A) | 0.9900   |
| C(15)-H(15B) | 0.9900   |
| O(2)-C(17)   | 1.465(3) |
| C(16)-C(18)  | 1.500(4) |
| C(16)-C(17)  | 1.520(4) |
| C(16)-C(19)  | 1.539(4) |
| C(17)-C(20)  | 1.488(4) |
| C(17)-C(21)  | 1.559(4) |
| C(18)-H(18A) | 0.9800   |
| C(18)-H(18B) | 0.9800   |
| C(18)-H(18C) | 0.9800   |
| C(19)-H(19A) | 0.9800   |
| C(19)-H(19B) | 0.9800   |

|                  |            |
|------------------|------------|
| C(19)-H(19C)     | 0.9800     |
| C(20)-H(20A)     | 0.9800     |
| C(20)-H(20B)     | 0.9800     |
| C(20)-H(20C)     | 0.9800     |
| C(21)-H(21A)     | 0.9800     |
| C(21)-H(21B)     | 0.9800     |
| C(21)-H(21C)     | 0.9800     |
|                  |            |
| B(2)-O(1)-C(16)  | 107.19(19) |
| C(5)-N(1)-B(1)   | 123.82(19) |
| C(5)-N(1)-H(1N)  | 116.4(14)  |
| B(1)-N(1)-H(1N)  | 119.8(14)  |
| C(13)-N(2)-B(1)  | 123.44(18) |
| C(13)-N(2)-H(2N) | 115.6(16)  |
| B(1)-N(2)-H(2N)  | 120.5(15)  |
| N(1)-B(1)-N(2)   | 115.8(2)   |
| N(1)-B(1)-C(4)   | 121.72(19) |
| N(2)-B(1)-C(4)   | 122.44(19) |
| O(2)-B(2)-O(1)   | 112.2(2)   |
| O(2)-B(2)-C(15)  | 124.2(2)   |
| O(1)-B(2)-C(15)  | 123.54(18) |
| C(2)-C(1)-H(1A)  | 120.0      |
| C(2)-C(1)-H(1B)  | 120.0      |
| H(1A)-C(1)-H(1B) | 120.0      |
| C(1)-C(2)-C(3)   | 122.3(5)   |
| C(1)-C(2)-H(2)   | 118.9      |
| C(3)-C(2)-H(2)   | 118.9      |
| C(2)-C(3)-C(4)   | 115.1(3)   |
| C(2)-C(3)-H(3A)  | 108.5      |
| C(4)-C(3)-H(3A)  | 108.5      |
| C(2)-C(3)-H(3B)  | 108.5      |
| C(4)-C(3)-H(3B)  | 108.5      |
| H(3A)-C(3)-H(3B) | 107.5      |
| C(3)-C(4)-C(15)  | 112.61(19) |
| C(3)-C(4)-B(1)   | 108.52(19) |
| C(15)-C(4)-B(1)  | 112.89(17) |

|                   |            |
|-------------------|------------|
| C(3)-C(4)-H(4)    | 101.5(12)  |
| C(15)-C(4)-H(4)   | 109.4(12)  |
| B(1)-C(4)-H(4)    | 111.3(11)  |
| C(6)-C(5)-N(1)    | 122.3(2)   |
| C(6)-C(5)-C(14)   | 120.1(2)   |
| N(1)-C(5)-C(14)   | 117.64(18) |
| C(5)-C(6)-C(7)    | 120.2(3)   |
| C(5)-C(6)-H(6)    | 119.9      |
| C(7)-C(6)-H(6)    | 119.9      |
| C(8)-C(7)-C(6)    | 121.1(3)   |
| C(8)-C(7)-H(7)    | 119.5      |
| C(6)-C(7)-H(7)    | 119.5      |
| C(7)-C(8)-C(9)    | 121.0(3)   |
| C(7)-C(8)-H(8)    | 119.5      |
| C(9)-C(8)-H(8)    | 119.5      |
| C(10)-C(9)-C(8)   | 123.4(3)   |
| C(10)-C(9)-C(14)  | 118.1(2)   |
| C(8)-C(9)-C(14)   | 118.5(2)   |
| C(11)-C(10)-C(9)  | 121.5(3)   |
| C(11)-C(10)-H(10) | 119.2      |
| C(9)-C(10)-H(10)  | 119.2      |
| C(10)-C(11)-C(12) | 120.8(3)   |
| C(10)-C(11)-H(11) | 119.6      |
| C(12)-C(11)-H(11) | 119.6      |
| C(13)-C(12)-C(11) | 119.9(2)   |
| C(13)-C(12)-H(12) | 120.1      |
| C(11)-C(12)-H(12) | 120.1      |
| C(12)-C(13)-N(2)  | 122.0(2)   |
| C(12)-C(13)-C(14) | 120.2(2)   |
| N(2)-C(13)-C(14)  | 117.76(18) |
| C(5)-C(14)-C(13)  | 121.42(19) |
| C(5)-C(14)-C(9)   | 119.2(2)   |
| C(13)-C(14)-C(9)  | 119.4(2)   |
| C(4)-C(15)-B(2)   | 113.40(16) |
| C(4)-C(15)-H(15A) | 108.9      |
| B(2)-C(15)-H(15A) | 108.9      |

|                     |          |
|---------------------|----------|
| C(4)-C(15)-H(15B)   | 108.9    |
| B(2)-C(15)-H(15B)   | 108.9    |
| H(15A)-C(15)-H(15B) | 107.7    |
| B(2)-O(2)-C(17)     | 107.1(2) |
| O(1)-C(16)-C(18)    | 110.7(3) |
| O(1)-C(16)-C(17)    | 101.0(3) |
| C(18)-C(16)-C(17)   | 116.7(3) |
| O(1)-C(16)-C(19)    | 106.2(3) |
| C(18)-C(16)-C(19)   | 109.3(3) |
| C(17)-C(16)-C(19)   | 112.2(3) |
| O(2)-C(17)-C(20)    | 108.9(2) |
| O(2)-C(17)-C(16)    | 102.9(2) |
| C(20)-C(17)-C(16)   | 117.5(3) |
| O(2)-C(17)-C(21)    | 106.4(2) |
| C(20)-C(17)-C(21)   | 109.2(3) |
| C(16)-C(17)-C(21)   | 111.2(3) |
| C(16)-C(18)-H(18A)  | 109.5    |
| C(16)-C(18)-H(18B)  | 109.5    |
| H(18A)-C(18)-H(18B) | 109.5    |
| C(16)-C(18)-H(18C)  | 109.5    |
| H(18A)-C(18)-H(18C) | 109.5    |
| H(18B)-C(18)-H(18C) | 109.5    |
| C(16)-C(19)-H(19A)  | 109.5    |
| C(16)-C(19)-H(19B)  | 109.5    |
| H(19A)-C(19)-H(19B) | 109.5    |
| C(16)-C(19)-H(19C)  | 109.5    |
| H(19A)-C(19)-H(19C) | 109.5    |
| H(19B)-C(19)-H(19C) | 109.5    |
| C(17)-C(20)-H(20A)  | 109.5    |
| C(17)-C(20)-H(20B)  | 109.5    |
| H(20A)-C(20)-H(20B) | 109.5    |
| C(17)-C(20)-H(20C)  | 109.5    |
| H(20A)-C(20)-H(20C) | 109.5    |
| H(20B)-C(20)-H(20C) | 109.5    |
| C(17)-C(21)-H(21A)  | 109.5    |
| C(17)-C(21)-H(21B)  | 109.5    |

|                     |       |
|---------------------|-------|
| H(21A)-C(21)-H(21B) | 109.5 |
| C(17)-C(21)-H(21C)  | 109.5 |
| H(21A)-C(21)-H(21C) | 109.5 |
| H(21B)-C(21)-H(21C) | 109.5 |

---

Symmetry transformations used to generate equivalent atoms:

**Table S18.** Anisotropic displacement parameters ( $\text{\AA}^2 \times 10^3$ ) for  $\text{C}_{21}\text{H}_{28}\text{B}_2\text{N}_2\text{O}_2$ . The anisotropic displacement factor exponent takes the form:  $-2p^2 [h^2 a^* U^{11} + \dots + 2 h k a^* b^* U^{12}]$

---

|       | U11     | U22     | U33     | U23    | U13    | U12     |
|-------|---------|---------|---------|--------|--------|---------|
| O(1)  | 81(1)   | 58(1)   | 81(1)   | 28(1)  | 48(1)  | 29(1)   |
| N(1)  | 62(1)   | 55(1)   | 67(1)   | 22(1)  | 31(1)  | 19(1)   |
| N(2)  | 67(1)   | 57(1)   | 69(1)   | 24(1)  | 35(1)  | 25(1)   |
| B(1)  | 57(1)   | 58(1)   | 69(1)   | 24(1)  | 40(1)  | 22(1)   |
| B(2)  | 48(1)   | 54(1)   | 68(1)   | 23(1)  | 25(1)  | 17(1)   |
| C(1)  | 190(6)  | 250(7)  | 83(3)   | 51(4)  | 67(3)  | 125(5)  |
| C(2)  | 111(3)  | 141(4)  | 49(2)   | 13(2)  | 33(2)  | 48(3)   |
| C(3)  | 70(2)   | 67(2)   | 54(2)   | 17(1)  | 30(2)  | 32(1)   |
| C(1X) | 280(30) | 490(50) | 178(13) | 66(15) | 87(14) | 80(30)  |
| C(2X) | 152(15) | 209(19) | 144(11) | 20(11) | 79(10) | 112(13) |
| C(3X) | 165(16) | 206(18) | 119(9)  | 54(9)  | 85(10) | 126(13) |
| C(4)  | 63(1)   | 61(1)   | 71(1)   | 24(1)  | 35(1)  | 26(1)   |
| C(5)  | 63(1)   | 73(1)   | 66(1)   | 29(1)  | 37(1)  | 26(1)   |
| C(6)  | 88(2)   | 88(2)   | 84(2)   | 45(1)  | 40(1)  | 36(1)   |
| C(7)  | 106(2)  | 123(2)  | 89(2)   | 57(2)  | 40(2)  | 54(2)   |
| C(8)  | 90(2)   | 134(2)  | 70(2)   | 36(2)  | 28(1)  | 44(2)   |
| C(9)  | 73(1)   | 100(2)  | 62(1)   | 18(1)  | 31(1)  | 25(1)   |
| C(10) | 82(2)   | 112(2)  | 72(2)   | 5(2)   | 28(1)  | 16(2)   |
| C(11) | 95(2)   | 85(2)   | 86(2)   | -4(1)  | 44(2)  | 6(2)    |
| C(12) | 87(2)   | 67(1)   | 82(2)   | 11(1)  | 47(1)  | 17(1)   |
| C(13) | 65(1)   | 65(1)   | 64(1)   | 16(1)  | 39(1)  | 19(1)   |



|        |         |         |         |        |         |        |
|--------|---------|---------|---------|--------|---------|--------|
| C(14)  | 62(1)   | 74(1)   | 61(1)   | 21(1)  | 36(1)   | 23(1)  |
| C(15)  | 63(1)   | 69(1)   | 71(1)   | 29(1)  | 34(1)   | 29(1)  |
| O(2)   | 80(2)   | 65(1)   | 107(2)  | 45(1)  | 64(2)   | 39(1)  |
| C(16)  | 84(2)   | 65(2)   | 76(2)   | 24(2)  | 49(2)   | 23(2)  |
| C(17)  | 89(2)   | 70(2)   | 113(2)  | 43(2)  | 74(2)   | 40(2)  |
| C(18)  | 133(4)  | 81(2)   | 106(4)  | 45(2)  | 78(3)   | 34(2)  |
| C(19)  | 101(2)  | 147(4)  | 76(2)   | 15(2)  | 31(2)   | 21(2)  |
| C(20)  | 158(4)  | 74(2)   | 164(4)  | 40(2)  | 125(3)  | 48(2)  |
| C(21)  | 62(2)   | 152(4)  | 135(3)  | 68(3)  | 56(2)   | 38(2)  |
| O(2X)  | 83(12)  | 58(6)   | 90(9)   | 28(5)  | 55(9)   | 26(6)  |
| C(16X) | 124(12) | 64(9)   | 102(8)  | 27(7)  | 81(8)   | 27(8)  |
| C(17X) | 149(10) | 74(9)   | 129(9)  | 43(6)  | 108(7)  | 42(7)  |
| C(18X) | 89(12)  | 75(11)  | 96(18)  | 53(11) | 63(11)  | 43(8)  |
| C(19X) | 135(13) | 140(20) | 104(10) | 38(11) | 69(9)   | 43(12) |
| C(20X) | 210(20) | 71(11)  | 133(10) | 29(8)  | 113(10) | 40(12) |
| C(21X) | 158(4)  | 74(2)   | 164(4)  | 40(2)  | 125(3)  | 48(2)  |

**Table S19. Hydrogen coordinates ( $\times 10^4$ ) and isotropic displacement parameters ( $\text{\AA}^2 \times 10^3$ ) for  $\text{C}_{21}\text{H}_{28}\text{B}_2\text{N}_2\text{O}_2$ .**

|        | x        | y        | z        | U(eq) |
|--------|----------|----------|----------|-------|
| H(1N)  | 6940(20) | 530(20)  | 5500(20) | 72    |
| H(2N)  | 7240(20) | 4240(20) | 5610(20) | 73    |
| H(1A)  | 5429     | 2546     | 840      | 196   |
| H(1B)  | 3959     | 1288     | -262     | 196   |
| H(2)   | 4075     | 272      | 1223     | 123   |
| H(3A)  | 6560     | 2645     | 2994     | 74    |
| H(3B)  | 6730     | 1205     | 3085     | 74    |
| H(1X1) | 3924     | 703      | -143     | 398   |
| H(1X2) | 2471     | -605     | -553     | 398   |
| H(2X)  | 3285     | -489     | 1513     | 192   |
| H(3X1) | 5385     | 2078     | 1918     | 174   |
| H(3X2) | 6244     | 997      | 2357     | 174   |
| H(4)   | 4740(20) | 820(20)  | 3622(19) | 74    |

|        |       |      |       |     |
|--------|-------|------|-------|-----|
| H(6)   | 8609  | -95  | 7304  | 98  |
| H(7)   | 10770 | 614  | 9324  | 121 |
| H(8)   | 12044 | 2831 | 10341 | 118 |
| H(10)  | 12311 | 5231 | 10334 | 116 |
| H(11)  | 11373 | 6766 | 9389  | 115 |
| H(12)  | 9155  | 6088 | 7397  | 94  |
| H(15A) | 3380  | 2303 | 2787  | 77  |
| H(15B) | 4795  | 3586 | 3757  | 77  |
| H(18A) | 2014  | 1708 | 7290  | 143 |
| H(18B) | 1315  | 792  | 5831  | 143 |
| H(18C) | 2903  | 735  | 6909  | 143 |
| H(19A) | 4458  | 3570 | 8231  | 175 |
| H(19B) | 5265  | 2560 | 7772  | 175 |
| H(19C) | 5225  | 3882 | 7327  | 175 |
| H(20A) | 1855  | 4300 | 7159  | 166 |
| H(20B) | 3404  | 5077 | 7183  | 166 |
| H(20C) | 1778  | 5092 | 6127  | 166 |
| H(21A) | 9     | 2275 | 5260  | 162 |
| H(21B) | 41    | 3147 | 4309  | 162 |
| H(21C) | 480   | 1779 | 4152  | 162 |
| H(18D) | 1524  | 1391 | 6737  | 109 |
| H(18E) | 987   | 939  | 5216  | 109 |
| H(18F) | 2215  | 355  | 6153  | 109 |
| H(19D) | 4586  | 2616 | 8219  | 182 |
| H(19E) | 4778  | 1425 | 7308  | 182 |
| H(19F) | 5512  | 2939 | 7430  | 182 |
| H(20D) | 3064  | 4419 | 7957  | 191 |
| H(20E) | 4656  | 4866 | 7907  | 191 |
| H(20F) | 3317  | 5514 | 7254  | 191 |
| H(21D) | 629   | 3268 | 5913  | 166 |
| H(21E) | 1067  | 4382 | 5290  | 166 |
| H(21F) | 736   | 2841 | 4591  | 166 |

---

**Table S20. Torsion angles [°] for C<sub>21</sub>H<sub>28</sub>B<sub>2</sub>N<sub>2</sub>O<sub>2</sub>.**

|                         |             |
|-------------------------|-------------|
| C(5)-N(1)-B(1)-N(2)     | -0.3(3)     |
| C(5)-N(1)-B(1)-C(4)     | 177.63(17)  |
| C(13)-N(2)-B(1)-N(1)    | 3.0(3)      |
| C(13)-N(2)-B(1)-C(4)    | -174.87(17) |
| C(16)-O(1)-B(2)-O(2)    | -13.7(3)    |
| C(16)-O(1)-B(2)-C(15)   | 168.9(2)    |
| C(1)-C(2)-C(3)-C(4)     | 128.2(4)    |
| C(2)-C(3)-C(4)-C(15)    | -61.5(3)    |
| C(2)-C(3)-C(4)-B(1)     | 172.8(3)    |
| N(1)-B(1)-C(4)-C(3)     | -91.1(2)    |
| N(2)-B(1)-C(4)-C(3)     | 86.7(2)     |
| N(1)-B(1)-C(4)-C(15)    | 143.38(19)  |
| N(2)-B(1)-C(4)-C(15)    | -38.8(3)    |
| B(1)-N(1)-C(5)-C(6)     | 177.7(2)    |
| B(1)-N(1)-C(5)-C(14)    | -2.5(3)     |
| N(1)-C(5)-C(6)-C(7)     | 178.3(2)    |
| C(14)-C(5)-C(6)-C(7)    | -1.4(3)     |
| C(5)-C(6)-C(7)-C(8)     | 0.2(4)      |
| C(6)-C(7)-C(8)-C(9)     | 0.0(4)      |
| C(7)-C(8)-C(9)-C(10)    | 179.7(3)    |
| C(7)-C(8)-C(9)-C(14)    | 0.9(4)      |
| C(8)-C(9)-C(10)-C(11)   | -177.2(3)   |
| C(14)-C(9)-C(10)-C(11)  | 1.5(4)      |
| C(9)-C(10)-C(11)-C(12)  | -0.6(4)     |
| C(10)-C(11)-C(12)-C(13) | -0.8(4)     |
| C(11)-C(12)-C(13)-N(2)  | -178.90(19) |
| C(11)-C(12)-C(13)-C(14) | 1.2(3)      |
| B(1)-N(2)-C(13)-C(12)   | 177.31(19)  |
| B(1)-N(2)-C(13)-C(14)   | -2.7(3)     |
| C(6)-C(5)-C(14)-C(13)   | -177.37(19) |
| N(1)-C(5)-C(14)-C(13)   | 2.8(3)      |
| C(6)-C(5)-C(14)-C(9)    | 2.4(3)      |
| N(1)-C(5)-C(14)-C(9)    | -177.38(17) |

|                         |            |
|-------------------------|------------|
| C(12)-C(13)-C(14)-C(5)  | 179.62(18) |
| N(2)-C(13)-C(14)-C(5)   | -0.3(3)    |
| C(12)-C(13)-C(14)-C(9)  | -0.2(3)    |
| N(2)-C(13)-C(14)-C(9)   | 179.89(17) |
| C(10)-C(9)-C(14)-C(5)   | 179.1(2)   |
| C(8)-C(9)-C(14)-C(5)    | -2.1(3)    |
| C(10)-C(9)-C(14)-C(13)  | -1.2(3)    |
| C(8)-C(9)-C(14)-C(13)   | 177.6(2)   |
| C(3)-C(4)-C(15)-B(2)    | -179.8(2)  |
| B(1)-C(4)-C(15)-B(2)    | -56.5(2)   |
| O(2)-B(2)-C(15)-C(4)    | 160.7(2)   |
| O(1)-B(2)-C(15)-C(4)    | -22.2(3)   |
| O(1)-B(2)-O(2)-C(17)    | -6.9(3)    |
| C(15)-B(2)-O(2)-C(17)   | 170.5(2)   |
| B(2)-O(1)-C(16)-C(18)   | 151.4(3)   |
| B(2)-O(1)-C(16)-C(17)   | 27.1(3)    |
| B(2)-O(1)-C(16)-C(19)   | -90.1(3)   |
| B(2)-O(2)-C(17)-C(20)   | 149.0(3)   |
| B(2)-O(2)-C(17)-C(16)   | 23.6(3)    |
| B(2)-O(2)-C(17)-C(21)   | -93.4(3)   |
| O(1)-C(16)-C(17)-O(2)   | -30.0(3)   |
| C(18)-C(16)-C(17)-O(2)  | -150.0(4)  |
| C(19)-C(16)-C(17)-O(2)  | 82.7(4)    |
| O(1)-C(16)-C(17)-C(20)  | -149.6(3)  |
| C(18)-C(16)-C(17)-C(20) | 90.3(4)    |
| C(19)-C(16)-C(17)-C(20) | -36.9(5)   |
| O(1)-C(16)-C(17)-C(21)  | 83.6(3)    |
| C(18)-C(16)-C(17)-C(21) | -36.4(5)   |
| C(19)-C(16)-C(17)-C(21) | -163.7(3)  |

---

Symmetry transformations used to generate equivalent atoms:

**Table S21. Hydrogen bonds for C<sub>21</sub>H<sub>28</sub>B<sub>2</sub>N<sub>2</sub>O<sub>2</sub> [Å and °].**

---

| D-H...A | d(D-H) | d(H...A) | d(D...A) | <(DHA) |
|---------|--------|----------|----------|--------|
|---------|--------|----------|----------|--------|

---

|                     |         |         |          |           |
|---------------------|---------|---------|----------|-----------|
| N(1)-H(1N)...O(1)#1 | 0.86(2) | 2.42(2) | 3.256(2) | 165.4(19) |
| N(2)-H(2N)...O(2)#2 | 0.83(2) | 2.40(2) | 3.213(3) | 167(2)    |

Symmetry transformations used to generate equivalent atoms:

#1 -x+1,-y,-z+1 #2 -x+1,-y+1,-z+1

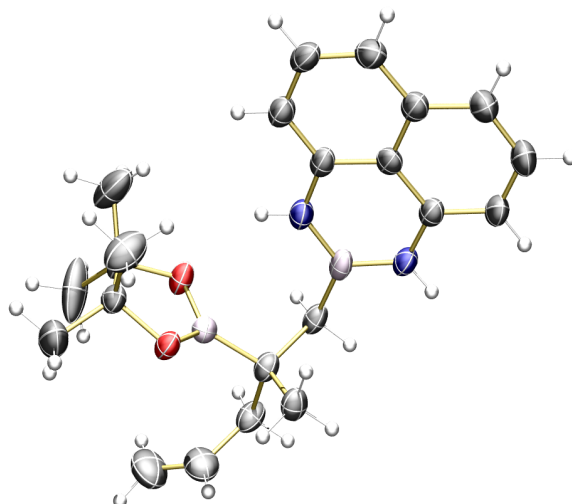

X-ray structure of 3

**Table S22. Crystal data and structure refinement for  $C_{22}H_{30}B_2N_2O_2$ .**

|                        |                                               |          |
|------------------------|-----------------------------------------------|----------|
| Identification code    | C22H30B2N2O2                                  |          |
| Empirical formula      | C22 H30 B2 N2 O2                              |          |
| Formula weight         | 376.10                                        |          |
| Temperature            | 173(2) K                                      |          |
| Wavelength             | 1.54178 Å                                     |          |
| Crystal system         | Orthorhombic                                  |          |
| Space group            | P2 <sub>1</sub> 2 <sub>1</sub> 2 <sub>1</sub> |          |
| Unit cell dimensions   | a = 9.0973(9) Å                               | α = 90°. |
|                        | b = 9.1634(10) Å                              | β = 90°. |
|                        | c = 51.260(6) Å                               | γ = 90°. |
| Volume                 | 4273.1(8) Å <sup>3</sup>                      |          |
| Z                      | 8                                             |          |
| Density (calculated)   | 1.169 Mg/m <sup>3</sup>                       |          |
| Absorption coefficient | 0.568 mm <sup>-1</sup>                        |          |
| F(000)                 | 1616                                          |          |
| Crystal size           | 0.220 x 0.180 x 0.090 mm <sup>3</sup>         |          |

|                                   |                                             |
|-----------------------------------|---------------------------------------------|
| Theta range for data collection   | 1.724 to 69.481°.                           |
| Index ranges                      | -10<=h<=8, -9<=k<=10, -60<=l<=60            |
| Reflections collected             | 28850                                       |
| Independent reflections           | 7512 [R(int) = 0.0507]                      |
| Completeness to theta = 67.679°   | 97.9 %                                      |
| Absorption correction             | Semi-empirical from equivalents             |
| Max. and min. transmission        | 0.7528 and 0.6258                           |
| Refinement method                 | Full-matrix least-squares on F <sup>2</sup> |
| Data / restraints / parameters    | 7512 / 8 / 564                              |
| Goodness-of-fit on F <sup>2</sup> | 1.043                                       |
| Final R indices [I>2sigma(I)]     | R1 = 0.0539, wR2 = 0.1256                   |
| R indices (all data)              | R1 = 0.0609, wR2 = 0.1325                   |
| Absolute structure parameter      | 0.06(11)                                    |
| Extinction coefficient            | 0.00081(13)                                 |
| Largest diff. peak and hole       | 0.320 and -0.208 e. Å <sup>-3</sup>         |

**Table S23. Atomic coordinates (x 10<sup>4</sup>) and equivalent isotropic displacement parameters (Å<sup>2</sup> x 10<sup>3</sup>) for C<sub>22</sub>H<sub>30</sub>B<sub>2</sub>N<sub>2</sub>O<sub>2</sub>. U(eq) is defined as one third of the trace of the orthogonalized U<sup>ij</sup> tensor.**

|       | x        | y        | z       | U(eq) |
|-------|----------|----------|---------|-------|
| O(1)  | 1137(3)  | 5934(3)  | 2024(1) | 37(1) |
| O(2)  | 2732(3)  | 7758(3)  | 2122(1) | 34(1) |
| N(1)  | 2932(4)  | 6746(3)  | 2710(1) | 34(1) |
| N(2)  | 4479(4)  | 4820(4)  | 2870(1) | 34(1) |
| B(1)  | 2527(5)  | 6289(5)  | 2100(1) | 31(1) |
| B(2)  | 4057(5)  | 5704(5)  | 2656(1) | 33(1) |
| C(1)  | 3947(15) | 3510(13) | 1528(2) | 98(5) |
| C(1X) | 3782(19) | 5275(19) | 1436(3) | 85(6) |
| C(2)  | 3889(6)  | 4631(7)  | 1654(1) | 64(1) |

|        |          |          |         |       |
|--------|----------|----------|---------|-------|
| C(3)   | 4721(5)  | 4984(5)  | 1899(1) | 43(1) |
| C(4)   | 3766(4)  | 5113(4)  | 2149(1) | 32(1) |
| C(5)   | 4784(4)  | 5562(4)  | 2378(1) | 33(1) |
| C(6)   | 2268(4)  | 6922(4)  | 2955(1) | 32(1) |
| C(7)   | 1199(4)  | 7946(4)  | 3001(1) | 39(1) |
| C(8)   | 566(5)   | 8068(5)  | 3249(1) | 44(1) |
| C(9)   | 1006(5)  | 7204(5)  | 3450(1) | 46(1) |
| C(10)  | 2117(5)  | 6150(4)  | 3413(1) | 37(1) |
| C(11)  | 2621(5)  | 5222(5)  | 3616(1) | 44(1) |
| C(12)  | 3696(5)  | 4224(5)  | 3570(1) | 44(1) |
| C(13)  | 4326(5)  | 4069(4)  | 3324(1) | 40(1) |
| C(14)  | 3873(4)  | 4940(4)  | 3120(1) | 32(1) |
| C(15)  | 2764(4)  | 5993(4)  | 3161(1) | 33(1) |
| C(16)  | 264(4)   | 7257(4)  | 1993(1) | 35(1) |
| C(17)  | 1404(4)  | 8515(4)  | 2031(1) | 36(1) |
| C(18)  | -448(7)  | 7199(6)  | 1730(1) | 75(2) |
| C(19)  | -892(6)  | 7208(6)  | 2207(1) | 76(2) |
| C(20)  | 1819(6)  | 9282(6)  | 1778(1) | 67(2) |
| C(21)  | 1033(6)  | 9651(6)  | 2234(1) | 70(2) |
| C(22)  | 3080(5)  | 3621(4)  | 2207(1) | 40(1) |
| O(3)   | 6676(3)  | 6395(3)  | 5478(1) | 35(1) |
| O(4)   | 4863(3)  | 4738(3)  | 5411(1) | 37(1) |
| N(3)   | 5830(4)  | 4485(3)  | 4820(1) | 36(1) |
| N(4)   | 7787(4)  | 2974(4)  | 4660(1) | 36(1) |
| B(3)   | 6351(4)  | 4995(4)  | 5421(1) | 29(1) |
| B(4)   | 6888(5)  | 3383(5)  | 4874(1) | 35(1) |
| C(23)  | 7332(11) | 3944(10) | 6077(1) | 75(3) |
| C(23X) | 9460(20) | 3760(20) | 5958(3) | 80(7) |
| C(24)  | 8143(6)  | 3806(6)  | 5863(1) | 56(1) |
| C(25)  | 7759(5)  | 2895(4)  | 5630(1) | 43(1) |
| C(26)  | 7552(4)  | 3769(4)  | 5373(1) | 34(1) |
| C(27)  | 7065(4)  | 2689(4)  | 5155(1) | 35(1) |
| C(28)  | 5643(4)  | 5144(4)  | 4576(1) | 34(1) |
| C(29)  | 4601(4)  | 6192(4)  | 4531(1) | 39(1) |
| C(30)  | 4462(5)  | 6830(4)  | 4283(1) | 44(1) |
| C(31)  | 5339(5)  | 6404(5)  | 4081(1) | 44(1) |

|       |         |         |         |       |
|-------|---------|---------|---------|-------|
| C(32) | 6421(4) | 5311(4) | 4119(1) | 39(1) |
| C(33) | 7363(5) | 4846(5) | 3916(1) | 49(1) |
| C(34) | 8409(5) | 3802(5) | 3961(1) | 49(1) |
| C(35) | 8567(5) | 3165(4) | 4206(1) | 41(1) |
| C(36) | 7668(4) | 3586(4) | 4411(1) | 34(1) |
| C(37) | 6580(4) | 4676(4) | 4370(1) | 34(1) |
| C(38) | 5322(4) | 7229(4) | 5502(1) | 35(1) |
| C(39) | 4090(4) | 6048(4) | 5505(1) | 40(1) |
| C(40) | 5440(6) | 8184(6) | 5738(1) | 66(2) |
| C(41) | 5272(6) | 8195(6) | 5261(1) | 66(1) |
| C(42) | 3555(8) | 5712(6) | 5781(1) | 92(2) |
| C(43) | 2816(6) | 6316(6) | 5329(1) | 81(2) |
| C(44) | 9013(4) | 4464(4) | 5297(1) | 39(1) |

**Table S24. Bond lengths [Å] and angles [°] for C<sub>22</sub>H<sub>30</sub>B<sub>2</sub>N<sub>2</sub>O<sub>2</sub>.**

|            |           |
|------------|-----------|
| O(1)-B(1)  | 1.363(5)  |
| O(1)-C(16) | 1.458(4)  |
| O(2)-B(1)  | 1.363(5)  |
| O(2)-C(17) | 1.469(4)  |
| N(1)-C(6)  | 1.404(5)  |
| N(1)-B(2)  | 1.427(5)  |
| N(1)-H(1N) | 0.89(5)   |
| N(2)-C(14) | 1.397(5)  |
| N(2)-B(2)  | 1.417(5)  |
| N(2)-H(2N) | 0.86(4)   |
| B(1)-C(4)  | 1.579(6)  |
| B(2)-C(5)  | 1.574(6)  |
| C(1)-C(2)  | 1.216(11) |
| C(1)-H(1A) | 0.9500    |
| C(1)-H(1B) | 0.9500    |
| C(2)-C(3)  | 1.501(6)  |
| C(2)-H(2)  | 1.04(6)   |
| C(3)-C(4)  | 1.550(5)  |



|              |          |
|--------------|----------|
| C(3)-H(3A)   | 0.9900   |
| C(3)-H(3B)   | 0.9900   |
| C(4)-C(22)   | 1.533(5) |
| C(4)-C(5)    | 1.553(5) |
| C(5)-H(5A)   | 0.9900   |
| C(5)-H(5B)   | 0.9900   |
| C(6)-C(7)    | 1.372(5) |
| C(6)-C(15)   | 1.430(5) |
| C(7)-C(8)    | 1.399(6) |
| C(7)-H(7)    | 0.9500   |
| C(8)-C(9)    | 1.358(6) |
| C(8)-H(8)    | 0.9500   |
| C(9)-C(10)   | 1.411(6) |
| C(9)-H(9)    | 0.9500   |
| C(10)-C(11)  | 1.421(5) |
| C(10)-C(15)  | 1.424(5) |
| C(11)-C(12)  | 1.359(6) |
| C(11)-H(11)  | 0.9500   |
| C(12)-C(13)  | 1.394(6) |
| C(12)-H(12)  | 0.9500   |
| C(13)-C(14)  | 1.380(5) |
| C(13)-H(13)  | 0.9500   |
| C(14)-C(15)  | 1.413(5) |
| C(16)-C(18)  | 1.498(6) |
| C(16)-C(19)  | 1.521(6) |
| C(16)-C(17)  | 1.562(5) |
| C(17)-C(21)  | 1.511(6) |
| C(17)-C(20)  | 1.519(6) |
| C(18)-H(18A) | 0.9800   |
| C(18)-H(18B) | 0.9800   |
| C(18)-H(18C) | 0.9800   |
| C(19)-H(19A) | 0.9800   |
| C(19)-H(19B) | 0.9800   |
| C(19)-H(19C) | 0.9800   |
| C(20)-H(20A) | 0.9800   |
| C(20)-H(20B) | 0.9800   |

|              |          |
|--------------|----------|
| C(20)-H(20C) | 0.9800   |
| C(21)-H(21A) | 0.9800   |
| C(21)-H(21B) | 0.9800   |
| C(21)-H(21C) | 0.9800   |
| C(22)-H(22A) | 0.9800   |
| C(22)-H(22B) | 0.9800   |
| C(22)-H(22C) | 0.9800   |
| O(3)-B(3)    | 1.348(5) |
| O(3)-C(38)   | 1.455(5) |
| O(4)-B(3)    | 1.375(5) |
| O(4)-C(39)   | 1.472(4) |
| N(3)-C(28)   | 1.403(5) |
| N(3)-B(4)    | 1.422(5) |
| N(3)-H(3N)   | 0.89(5)  |
| N(4)-C(36)   | 1.399(5) |
| N(4)-B(4)    | 1.421(5) |
| N(4)-H(4N)   | 0.86(5)  |
| B(3)-C(26)   | 1.587(5) |
| B(4)-C(27)   | 1.582(6) |
| C(23)-C(24)  | 1.329(9) |
| C(23)-H(23A) | 0.9500   |
| C(23)-H(23B) | 0.9500   |
| C(24)-C(25)  | 1.499(6) |
| C(24)-H(24)  | 1.04(6)  |
| C(25)-C(26)  | 1.553(5) |
| C(25)-H(25A) | 0.9900   |
| C(25)-H(25B) | 0.9900   |
| C(26)-C(44)  | 1.525(5) |
| C(26)-C(27)  | 1.556(5) |
| C(27)-H(27A) | 0.9900   |
| C(27)-H(27B) | 0.9900   |
| C(28)-C(29)  | 1.369(5) |
| C(28)-C(37)  | 1.424(5) |
| C(29)-C(30)  | 1.406(6) |
| C(29)-H(29)  | 0.9500   |
| C(30)-C(31)  | 1.361(6) |

|                 |          |
|-----------------|----------|
| C(30)-H(30)     | 0.9500   |
| C(31)-C(32)     | 1.417(6) |
| C(31)-H(31)     | 0.9500   |
| C(32)-C(33)     | 1.413(6) |
| C(32)-C(37)     | 1.419(5) |
| C(33)-C(34)     | 1.369(6) |
| C(33)-H(33)     | 0.9500   |
| C(34)-C(35)     | 1.393(6) |
| C(34)-H(34)     | 0.9500   |
| C(35)-C(36)     | 1.383(5) |
| C(35)-H(35)     | 0.9500   |
| C(36)-C(37)     | 1.422(5) |
| C(38)-C(40)     | 1.497(6) |
| C(38)-C(41)     | 1.524(6) |
| C(38)-C(39)     | 1.558(6) |
| C(39)-C(43)     | 1.488(7) |
| C(39)-C(42)     | 1.529(6) |
| C(40)-H(40A)    | 0.9800   |
| C(40)-H(40B)    | 0.9800   |
| C(40)-H(40C)    | 0.9800   |
| C(41)-H(41A)    | 0.9800   |
| C(41)-H(41B)    | 0.9800   |
| C(41)-H(41C)    | 0.9800   |
| C(42)-H(42A)    | 0.9800   |
| C(42)-H(42B)    | 0.9800   |
| C(42)-H(42C)    | 0.9800   |
| C(43)-H(43A)    | 0.9800   |
| C(43)-H(43B)    | 0.9800   |
| C(43)-H(43C)    | 0.9800   |
| C(44)-H(44A)    | 0.9800   |
| C(44)-H(44B)    | 0.9800   |
| C(44)-H(44C)    | 0.9800   |
| <br>            |          |
| B(1)-O(1)-C(16) | 109.7(3) |
| B(1)-O(2)-C(17) | 109.1(3) |
| C(6)-N(1)-B(2)  | 124.0(3) |

|                  |          |
|------------------|----------|
| C(6)-N(1)-H(1N)  | 117(3)   |
| B(2)-N(1)-H(1N)  | 119(3)   |
| C(14)-N(2)-B(2)  | 123.9(3) |
| C(14)-N(2)-H(2N) | 114(3)   |
| B(2)-N(2)-H(2N)  | 122(3)   |
| O(1)-B(1)-O(2)   | 112.7(3) |
| O(1)-B(1)-C(4)   | 123.0(3) |
| O(2)-B(1)-C(4)   | 124.2(3) |
| N(2)-B(2)-N(1)   | 115.2(4) |
| N(2)-B(2)-C(5)   | 122.6(4) |
| N(1)-B(2)-C(5)   | 122.2(3) |
| C(2)-C(1)-H(1A)  | 120.0    |
| C(2)-C(1)-H(1B)  | 120.0    |
| H(1A)-C(1)-H(1B) | 120.0    |
| C(1)-C(2)-C(3)   | 127.4(7) |
| C(1)-C(2)-H(2)   | 120(7)   |
| C(3)-C(2)-H(2)   | 113(7)   |
| C(2)-C(3)-C(4)   | 115.1(4) |
| C(2)-C(3)-H(3A)  | 108.5    |
| C(4)-C(3)-H(3A)  | 108.5    |
| C(2)-C(3)-H(3B)  | 108.5    |
| C(4)-C(3)-H(3B)  | 108.5    |
| H(3A)-C(3)-H(3B) | 107.5    |
| C(22)-C(4)-C(3)  | 108.8(3) |
| C(22)-C(4)-C(5)  | 109.3(3) |
| C(3)-C(4)-C(5)   | 108.1(3) |
| C(22)-C(4)-B(1)  | 110.4(3) |
| C(3)-C(4)-B(1)   | 108.7(3) |
| C(5)-C(4)-B(1)   | 111.5(3) |
| C(4)-C(5)-B(2)   | 117.1(3) |
| C(4)-C(5)-H(5A)  | 108.0    |
| B(2)-C(5)-H(5A)  | 108.0    |
| C(4)-C(5)-H(5B)  | 108.0    |
| B(2)-C(5)-H(5B)  | 108.0    |
| H(5A)-C(5)-H(5B) | 107.3    |
| C(7)-C(6)-N(1)   | 122.6(3) |

|                   |          |
|-------------------|----------|
| C(7)-C(6)-C(15)   | 120.2(3) |
| N(1)-C(6)-C(15)   | 117.2(3) |
| C(6)-C(7)-C(8)    | 120.2(4) |
| C(6)-C(7)-H(7)    | 119.9    |
| C(8)-C(7)-H(7)    | 119.9    |
| C(9)-C(8)-C(7)    | 121.3(4) |
| C(9)-C(8)-H(8)    | 119.3    |
| C(7)-C(8)-H(8)    | 119.3    |
| C(8)-C(9)-C(10)   | 120.5(4) |
| C(8)-C(9)-H(9)    | 119.8    |
| C(10)-C(9)-H(9)   | 119.8    |
| C(9)-C(10)-C(11)  | 122.8(4) |
| C(9)-C(10)-C(15)  | 119.2(4) |
| C(11)-C(10)-C(15) | 118.0(4) |
| C(12)-C(11)-C(10) | 120.5(4) |
| C(12)-C(11)-H(11) | 119.7    |
| C(10)-C(11)-H(11) | 119.7    |
| C(11)-C(12)-C(13) | 121.4(4) |
| C(11)-C(12)-H(12) | 119.3    |
| C(13)-C(12)-H(12) | 119.3    |
| C(14)-C(13)-C(12) | 120.4(4) |
| C(14)-C(13)-H(13) | 119.8    |
| C(12)-C(13)-H(13) | 119.8    |
| C(13)-C(14)-N(2)  | 122.1(3) |
| C(13)-C(14)-C(15) | 119.6(3) |
| N(2)-C(14)-C(15)  | 118.3(3) |
| C(14)-C(15)-C(10) | 120.1(3) |
| C(14)-C(15)-C(6)  | 121.4(3) |
| C(10)-C(15)-C(6)  | 118.6(3) |
| O(1)-C(16)-C(18)  | 107.6(4) |
| O(1)-C(16)-C(19)  | 105.9(3) |
| C(18)-C(16)-C(19) | 110.5(4) |
| O(1)-C(16)-C(17)  | 103.8(3) |
| C(18)-C(16)-C(17) | 115.1(3) |
| C(19)-C(16)-C(17) | 113.0(4) |
| O(2)-C(17)-C(21)  | 106.9(3) |

|                     |          |
|---------------------|----------|
| O(2)-C(17)-C(20)    | 106.5(3) |
| C(21)-C(17)-C(20)   | 108.9(4) |
| O(2)-C(17)-C(16)    | 103.7(3) |
| C(21)-C(17)-C(16)   | 116.5(4) |
| C(20)-C(17)-C(16)   | 113.6(3) |
| C(16)-C(18)-H(18A)  | 109.5    |
| C(16)-C(18)-H(18B)  | 109.5    |
| H(18A)-C(18)-H(18B) | 109.5    |
| C(16)-C(18)-H(18C)  | 109.5    |
| H(18A)-C(18)-H(18C) | 109.5    |
| H(18B)-C(18)-H(18C) | 109.5    |
| C(16)-C(19)-H(19A)  | 109.5    |
| C(16)-C(19)-H(19B)  | 109.5    |
| H(19A)-C(19)-H(19B) | 109.5    |
| C(16)-C(19)-H(19C)  | 109.5    |
| H(19A)-C(19)-H(19C) | 109.5    |
| H(19B)-C(19)-H(19C) | 109.5    |
| C(17)-C(20)-H(20A)  | 109.5    |
| C(17)-C(20)-H(20B)  | 109.5    |
| H(20A)-C(20)-H(20B) | 109.5    |
| C(17)-C(20)-H(20C)  | 109.5    |
| H(20A)-C(20)-H(20C) | 109.5    |
| H(20B)-C(20)-H(20C) | 109.5    |
| C(17)-C(21)-H(21A)  | 109.5    |
| C(17)-C(21)-H(21B)  | 109.5    |
| H(21A)-C(21)-H(21B) | 109.5    |
| C(17)-C(21)-H(21C)  | 109.5    |
| H(21A)-C(21)-H(21C) | 109.5    |
| H(21B)-C(21)-H(21C) | 109.5    |
| C(4)-C(22)-H(22A)   | 109.5    |
| C(4)-C(22)-H(22B)   | 109.5    |
| H(22A)-C(22)-H(22B) | 109.5    |
| C(4)-C(22)-H(22C)   | 109.5    |
| H(22A)-C(22)-H(22C) | 109.5    |
| H(22B)-C(22)-H(22C) | 109.5    |
| B(3)-O(3)-C(38)     | 109.5(3) |

|                     |          |
|---------------------|----------|
| B(3)-O(4)-C(39)     | 108.6(3) |
| C(28)-N(3)-B(4)     | 124.1(3) |
| C(28)-N(3)-H(3N)    | 118(3)   |
| B(4)-N(3)-H(3N)     | 118(3)   |
| C(36)-N(4)-B(4)     | 123.8(3) |
| C(36)-N(4)-H(4N)    | 114(3)   |
| B(4)-N(4)-H(4N)     | 122(3)   |
| O(3)-B(3)-O(4)      | 112.7(3) |
| O(3)-B(3)-C(26)     | 123.8(3) |
| O(4)-B(3)-C(26)     | 123.4(3) |
| N(4)-B(4)-N(3)      | 115.3(4) |
| N(4)-B(4)-C(27)     | 122.7(4) |
| N(3)-B(4)-C(27)     | 122.0(3) |
| C(24)-C(23)-H(23A)  | 120.0    |
| C(24)-C(23)-H(23B)  | 120.0    |
| H(23A)-C(23)-H(23B) | 120.0    |
| C(23)-C(24)-C(25)   | 125.6(6) |
| C(23)-C(24)-H(24)   | 120(5)   |
| C(25)-C(24)-H(24)   | 114(5)   |
| C(24)-C(25)-C(26)   | 114.6(3) |
| C(24)-C(25)-H(25A)  | 108.6    |
| C(26)-C(25)-H(25A)  | 108.6    |
| C(24)-C(25)-H(25B)  | 108.6    |
| C(26)-C(25)-H(25B)  | 108.6    |
| H(25A)-C(25)-H(25B) | 107.6    |
| C(44)-C(26)-C(25)   | 109.1(3) |
| C(44)-C(26)-C(27)   | 109.3(3) |
| C(25)-C(26)-C(27)   | 108.4(3) |
| C(44)-C(26)-B(3)    | 110.1(3) |
| C(25)-C(26)-B(3)    | 108.4(3) |
| C(27)-C(26)-B(3)    | 111.5(3) |
| C(26)-C(27)-B(4)    | 115.2(3) |
| C(26)-C(27)-H(27A)  | 108.5    |
| B(4)-C(27)-H(27A)   | 108.5    |
| C(26)-C(27)-H(27B)  | 108.5    |
| B(4)-C(27)-H(27B)   | 108.5    |

|                     |          |
|---------------------|----------|
| H(27A)-C(27)-H(27B) | 107.5    |
| C(29)-C(28)-N(3)    | 122.4(3) |
| C(29)-C(28)-C(37)   | 120.1(4) |
| N(3)-C(28)-C(37)    | 117.5(3) |
| C(28)-C(29)-C(30)   | 120.4(4) |
| C(28)-C(29)-H(29)   | 119.8    |
| C(30)-C(29)-H(29)   | 119.8    |
| C(31)-C(30)-C(29)   | 120.9(4) |
| C(31)-C(30)-H(30)   | 119.6    |
| C(29)-C(30)-H(30)   | 119.6    |
| C(30)-C(31)-C(32)   | 120.5(4) |
| C(30)-C(31)-H(31)   | 119.7    |
| C(32)-C(31)-H(31)   | 119.7    |
| C(33)-C(32)-C(31)   | 122.4(4) |
| C(33)-C(32)-C(37)   | 118.8(4) |
| C(31)-C(32)-C(37)   | 118.9(4) |
| C(34)-C(33)-C(32)   | 120.4(4) |
| C(34)-C(33)-H(33)   | 119.8    |
| C(32)-C(33)-H(33)   | 119.8    |
| C(33)-C(34)-C(35)   | 121.3(4) |
| C(33)-C(34)-H(34)   | 119.4    |
| C(35)-C(34)-H(34)   | 119.4    |
| C(36)-C(35)-C(34)   | 120.3(4) |
| C(36)-C(35)-H(35)   | 119.9    |
| C(34)-C(35)-H(35)   | 119.9    |
| C(35)-C(36)-N(4)    | 122.2(3) |
| C(35)-C(36)-C(37)   | 119.7(4) |
| N(4)-C(36)-C(37)    | 118.1(3) |
| C(32)-C(37)-C(36)   | 119.6(3) |
| C(32)-C(37)-C(28)   | 119.2(3) |
| C(36)-C(37)-C(28)   | 121.2(3) |
| O(3)-C(38)-C(40)    | 108.5(3) |
| O(3)-C(38)-C(41)    | 105.1(3) |
| C(40)-C(38)-C(41)   | 108.7(4) |
| O(3)-C(38)-C(39)    | 104.1(3) |
| C(40)-C(38)-C(39)   | 116.9(4) |



|                     |          |
|---------------------|----------|
| C(41)-C(38)-C(39)   | 112.8(4) |
| O(4)-C(39)-C(43)    | 108.0(4) |
| O(4)-C(39)-C(42)    | 106.9(3) |
| C(43)-C(39)-C(42)   | 110.2(5) |
| O(4)-C(39)-C(38)    | 102.8(3) |
| C(43)-C(39)-C(38)   | 116.2(4) |
| C(42)-C(39)-C(38)   | 112.1(4) |
| C(38)-C(40)-H(40A)  | 109.5    |
| C(38)-C(40)-H(40B)  | 109.5    |
| H(40A)-C(40)-H(40B) | 109.5    |
| C(38)-C(40)-H(40C)  | 109.5    |
| H(40A)-C(40)-H(40C) | 109.5    |
| H(40B)-C(40)-H(40C) | 109.5    |
| C(38)-C(41)-H(41A)  | 109.5    |
| C(38)-C(41)-H(41B)  | 109.5    |
| H(41A)-C(41)-H(41B) | 109.5    |
| C(38)-C(41)-H(41C)  | 109.5    |
| H(41A)-C(41)-H(41C) | 109.5    |
| H(41B)-C(41)-H(41C) | 109.5    |
| C(39)-C(42)-H(42A)  | 109.5    |
| C(39)-C(42)-H(42B)  | 109.5    |
| H(42A)-C(42)-H(42B) | 109.5    |
| C(39)-C(42)-H(42C)  | 109.5    |
| H(42A)-C(42)-H(42C) | 109.5    |
| H(42B)-C(42)-H(42C) | 109.5    |
| C(39)-C(43)-H(43A)  | 109.5    |
| C(39)-C(43)-H(43B)  | 109.5    |
| H(43A)-C(43)-H(43B) | 109.5    |
| C(39)-C(43)-H(43C)  | 109.5    |
| H(43A)-C(43)-H(43C) | 109.5    |
| H(43B)-C(43)-H(43C) | 109.5    |
| C(26)-C(44)-H(44A)  | 109.5    |
| C(26)-C(44)-H(44B)  | 109.5    |
| H(44A)-C(44)-H(44B) | 109.5    |
| C(26)-C(44)-H(44C)  | 109.5    |
| H(44A)-C(44)-H(44C) | 109.5    |

H(44B)-C(44)-H(44C) 109.5

Symmetry transformations used to generate equivalent atoms:

**Table S25. Anisotropic displacement parameters ( $\text{\AA}^2 \times 10^3$ ) for  $\text{C}_{22}\text{H}_{30}\text{B}_2\text{N}_2\text{O}_2$ . The anisotropic displacement factor exponent takes the form:  $-2p^2[h^2 a^* U^{11} + \dots + 2 h k a^* b^* U^{12}]$**

|       | U <sup>11</sup> | U <sup>22</sup> | U <sup>33</sup> | U <sup>23</sup> | U <sup>13</sup> | U <sup>12</sup> |
|-------|-----------------|-----------------|-----------------|-----------------|-----------------|-----------------|
| O(1)  | 30(1)           | 29(1)           | 52(2)           | -1(1)           | -7(1)           | 3(1)            |
| O(2)  | 33(1)           | 27(1)           | 43(1)           | 5(1)            | -6(1)           | 1(1)            |
| N(1)  | 37(2)           | 29(2)           | 35(2)           | 3(1)            | -3(1)           | 1(1)            |
| N(2)  | 34(2)           | 29(2)           | 39(2)           | -1(1)           | -6(1)           | 6(2)            |
| B(1)  | 32(2)           | 36(2)           | 25(2)           | -1(2)           | 1(2)            | 0(2)            |
| B(2)  | 31(2)           | 29(2)           | 39(2)           | 0(2)            | -10(2)          | -4(2)           |
| C(1)  | 127(11)         | 106(9)          | 61(6)           | -40(6)          | -24(6)          | 53(8)           |
| C(1X) | 100(12)         | 108(13)         | 47(8)           | -8(8)           | 0(8)            | -3(10)          |
| C(2)  | 61(3)           | 91(4)           | 39(3)           | -5(3)           | 2(2)            | 20(3)           |
| C(3)  | 41(2)           | 45(2)           | 43(2)           | 4(2)            | 3(2)            | 13(2)           |
| C(4)  | 34(2)           | 29(2)           | 34(2)           | 1(2)            | -4(2)           | 0(2)            |
| C(5)  | 25(2)           | 31(2)           | 44(2)           | 4(2)            | -4(2)           | 3(2)            |
| C(6)  | 33(2)           | 24(2)           | 38(2)           | -2(1)           | -6(2)           | -2(2)           |
| C(7)  | 42(2)           | 32(2)           | 43(2)           | 0(2)            | -4(2)           | 4(2)            |
| C(8)  | 41(2)           | 40(2)           | 50(2)           | -7(2)           | 0(2)            | 9(2)            |
| C(9)  | 51(3)           | 46(2)           | 41(2)           | -10(2)          | 2(2)            | 1(2)            |
| C(10) | 42(2)           | 31(2)           | 38(2)           | -7(2)           | -5(2)           | -2(2)           |
| C(11) | 53(3)           | 47(2)           | 34(2)           | -2(2)           | -5(2)           | -5(2)           |
| C(12) | 53(3)           | 41(2)           | 36(2)           | 3(2)            | -14(2)          | -3(2)           |
| C(13) | 43(2)           | 37(2)           | 41(2)           | 2(2)            | -11(2)          | 2(2)            |
| C(14) | 35(2)           | 27(2)           | 34(2)           | 0(2)            | -8(2)           | -5(2)           |
| C(15) | 31(2)           | 28(2)           | 39(2)           | -3(2)           | -8(2)           | -5(2)           |
| C(16) | 32(2)           | 32(2)           | 40(2)           | 7(2)            | -2(2)           | 3(2)            |
| C(17) | 37(2)           | 31(2)           | 39(2)           | 4(2)            | -5(2)           | 6(2)            |
| C(18) | 96(4)           | 51(3)           | 79(3)           | 11(3)           | -51(3)          | -11(3)          |
| C(19) | 62(3)           | 51(3)           | 113(4)          | 14(3)           | 40(3)           | 5(3)            |

|        |         |        |        |        |         |        |
|--------|---------|--------|--------|--------|---------|--------|
| C(20)  | 52(3)   | 73(3)  | 77(3)  | 42(3)  | -15(3)  | -14(3) |
| C(21)  | 59(3)   | 63(3)  | 88(4)  | -30(3) | -17(3)  | 18(3)  |
| C(22)  | 45(2)   | 30(2)  | 47(2)  | 3(2)   | -8(2)   | 1(2)   |
| O(3)   | 27(1)   | 30(1)  | 49(2)  | -7(1)  | -2(1)   | 3(1)   |
| O(4)   | 27(1)   | 27(1)  | 58(2)  | -7(1)  | 8(1)    | -2(1)  |
| N(3)   | 32(2)   | 34(2)  | 41(2)  | -8(1)  | 3(2)    | 2(1)   |
| N(4)   | 30(2)   | 33(2)  | 45(2)  | -7(1)  | -1(1)   | 8(2)   |
| B(3)   | 29(2)   | 28(2)  | 31(2)  | 1(2)   | 2(2)    | -2(2)  |
| B(4)   | 27(2)   | 28(2)  | 51(3)  | -14(2) | 3(2)    | -2(2)  |
| C(23)  | 100(7)  | 81(6)  | 44(4)  | 3(4)   | -5(4)   | 10(5)  |
| C(23X) | 116(18) | 73(13) | 52(10) | 10(9)  | -38(11) | 7(12)  |
| C(24)  | 71(3)   | 53(3)  | 45(3)  | 11(2)  | -7(2)   | 8(3)   |
| C(25)  | 40(2)   | 37(2)  | 52(2)  | 11(2)  | 3(2)    | 9(2)   |
| C(26)  | 31(2)   | 28(2)  | 44(2)  | 0(2)   | 4(2)    | 2(2)   |
| C(27)  | 27(2)   | 26(2)  | 53(2)  | -4(2)  | 4(2)    | 1(2)   |
| C(28)  | 26(2)   | 30(2)  | 46(2)  | -12(2) | -1(2)   | -2(2)  |
| C(29)  | 30(2)   | 38(2)  | 50(2)  | -11(2) | -2(2)   | 2(2)   |
| C(30)  | 35(2)   | 38(2)  | 58(3)  | -12(2) | -11(2)  | 10(2)  |
| C(31)  | 43(2)   | 44(2)  | 44(2)  | -7(2)  | -10(2)  | 5(2)   |
| C(32)  | 34(2)   | 40(2)  | 43(2)  | -14(2) | -6(2)   | 1(2)   |
| C(33)  | 52(3)   | 56(3)  | 39(2)  | -13(2) | -5(2)   | 12(2)  |
| C(34)  | 51(3)   | 53(3)  | 42(2)  | -18(2) | 3(2)    | 8(2)   |
| C(35)  | 38(2)   | 41(2)  | 43(2)  | -15(2) | -1(2)   | 10(2)  |
| C(36)  | 29(2)   | 32(2)  | 42(2)  | -11(2) | -2(2)   | 0(2)   |
| C(37)  | 31(2)   | 32(2)  | 38(2)  | -13(2) | -7(2)   | -2(2)  |
| C(38)  | 34(2)   | 31(2)  | 42(2)  | -5(2)  | -2(2)   | 6(2)   |
| C(39)  | 28(2)   | 33(2)  | 60(2)  | -7(2)  | 9(2)    | 7(2)   |
| C(40)  | 55(3)   | 69(3)  | 75(3)  | -32(3) | -5(3)   | 10(3)  |
| C(41)  | 56(3)   | 61(3)  | 82(4)  | 27(3)  | 6(3)    | 8(3)   |
| C(42)  | 122(5)  | 50(3)  | 105(4) | 7(3)   | 83(4)   | 15(3)  |
| C(43)  | 41(3)   | 53(3)  | 148(6) | -25(3) | -20(3)  | 10(2)  |
| C(44)  | 32(2)   | 38(2)  | 47(2)  | -5(2)  | 7(2)    | -3(2)  |

---

**Table S26. Hydrogen coordinates ( $\times 10^4$ ) and isotropic displacement parameters ( $\text{\AA}^2 \times 10^3$ ) for  $\text{C}_{22}\text{H}_{30}\text{B}_2\text{N}_2\text{O}_2$ .**

|        | x         | y         | z        | U(eq)  |
|--------|-----------|-----------|----------|--------|
| H(1N)  | 2700(60)  | 7390(60)  | 2588(10) | 66(16) |
| H(2N)  | 5150(40)  | 4160(50)  | 2856(7)  | 34(11) |
| H(1A)  | 4574      | 2737      | 1581     | 117    |
| H(1B)  | 3365      | 3408      | 1375     | 117    |
| H(2)   | 3190(120) | 5470(100) | 1600(30) | 117    |
| H(1X1) | 4297      | 6162      | 1407     | 102    |
| H(1X2) | 3187      | 4871      | 1302     | 102    |
| H(2X)  | 3420(170) | 3630(110) | 1700(30) | 102    |
| H(3A)  | 5247      | 5918      | 1873     | 52     |
| H(3B)  | 5469      | 4217      | 1928     | 52     |
| H(5A)  | 5240      | 6512      | 2334     | 40     |
| H(5B)  | 5587      | 4835      | 2390     | 40     |
| H(7)   | 889       | 8575      | 2865     | 47     |
| H(8)   | -187      | 8769      | 3277     | 53     |
| H(9)   | 562       | 7311      | 3617     | 55     |
| H(11)  | 2204      | 5300      | 3785     | 53     |
| H(12)  | 4025      | 3620      | 3709     | 52     |
| H(13)  | 5072      | 3360      | 3297     | 48     |
| H(18A) | 306       | 7051      | 1596     | 113    |
| H(18B) | -965      | 8118      | 1696     | 113    |
| H(18C) | -1151     | 6389      | 1724     | 113    |
| H(19A) | -1522     | 6352      | 2182     | 113    |
| H(19B) | -1492     | 8095      | 2200     | 113    |
| H(19C) | -406      | 7145      | 2377     | 113    |
| H(20A) | 2636      | 9954      | 1811     | 101    |
| H(20B) | 972       | 9831      | 1713     | 101    |
| H(20C) | 2118      | 8556      | 1649     | 101    |
| H(21A) | 771       | 9166      | 2398     | 105    |
| H(21B) | 201       | 10240     | 2173     | 105    |
| H(21C) | 1887      | 10283     | 2262     | 105    |
| H(22A) | 3860      | 2891      | 2226     | 61     |
| H(22B) | 2427      | 3341      | 2064     | 61     |
| H(22C) | 2514      | 3677      | 2369     | 61     |

|        |           |           |          |        |
|--------|-----------|-----------|----------|--------|
| H(3N)  | 5230(60)  | 4750(60)  | 4949(10) | 67(16) |
| H(4N)  | 8500(50)  | 2360(50)  | 4677(9)  | 53(14) |
| H(23A) | 6424      | 3438      | 6091     | 90     |
| H(23B) | 7661      | 4547      | 6216     | 90     |
| H(24)  | 9050(80)  | 4470(90)  | 5837(17) | 90     |
| H(23C) | 10183     | 3152      | 5880     | 96     |
| H(23D) | 9707      | 4339      | 6106     | 96     |
| H(24X) | 7220(150) | 4400(200) | 5920(40) | 96     |
| H(25A) | 6839      | 2358      | 5667     | 52     |
| H(25B) | 8546      | 2164      | 5603     | 52     |
| H(27A) | 6114      | 2250      | 5206     | 42     |
| H(27B) | 7796      | 1890      | 5145     | 42     |
| H(29)  | 3969      | 6491      | 4668     | 47     |
| H(30)  | 3746      | 7569      | 4255     | 53     |
| H(31)  | 5224      | 6842      | 3915     | 52     |
| H(33)  | 7271      | 5260      | 3747     | 59     |
| H(34)  | 9038      | 3507      | 3823     | 59     |
| H(35)  | 9296      | 2438      | 4234     | 49     |
| H(40A) | 5618      | 7579      | 5893     | 99     |
| H(40B) | 4521      | 8729      | 5761     | 99     |
| H(40C) | 6256      | 8870      | 5716     | 99     |
| H(41A) | 6144      | 8822      | 5257     | 99     |
| H(41B) | 4386      | 8803      | 5266     | 99     |
| H(41C) | 5253      | 7582      | 5104     | 99     |
| H(42A) | 2820      | 4931      | 5774     | 138    |
| H(42B) | 3113      | 6590      | 5857     | 138    |
| H(42C) | 4388      | 5400      | 5888     | 138    |
| H(43A) | 3170      | 6502      | 5151     | 121    |
| H(43B) | 2263      | 7165      | 5391     | 121    |
| H(43C) | 2174      | 5457      | 5328     | 121    |
| H(44A) | 9328      | 5137      | 5434     | 58     |
| H(44B) | 8894      | 5002      | 5133     | 58     |
| H(44C) | 9756      | 3700      | 5274     | 58     |

**Table S27.** Torsion angles [°] for  $C_{22}H_{30}B_2N_2O_2$ .

---

|                         |            |
|-------------------------|------------|
| C(16)-O(1)-B(1)-O(2)    | -1.1(4)    |
| C(16)-O(1)-B(1)-C(4)    | -179.5(3)  |
| C(17)-O(2)-B(1)-O(1)    | -5.4(4)    |
| C(17)-O(2)-B(1)-C(4)    | 173.0(3)   |
| C(14)-N(2)-B(2)-N(1)    | -0.6(5)    |
| C(14)-N(2)-B(2)-C(5)    | 178.7(3)   |
| C(6)-N(1)-B(2)-N(2)     | 0.2(5)     |
| C(6)-N(1)-B(2)-C(5)     | -179.1(3)  |
| C(1)-C(2)-C(3)-C(4)     | -112.2(11) |
| C(2)-C(3)-C(4)-C(22)    | 64.4(5)    |
| C(2)-C(3)-C(4)-C(5)     | -177.0(4)  |
| C(2)-C(3)-C(4)-B(1)     | -55.9(5)   |
| O(1)-B(1)-C(4)-C(22)    | -22.7(5)   |
| O(2)-B(1)-C(4)-C(22)    | 159.1(3)   |
| O(1)-B(1)-C(4)-C(3)     | 96.6(4)    |
| O(2)-B(1)-C(4)-C(3)     | -81.7(4)   |
| O(1)-B(1)-C(4)-C(5)     | -144.4(3)  |
| O(2)-B(1)-C(4)-C(5)     | 37.4(5)    |
| C(22)-C(4)-C(5)-B(2)    | -59.6(4)   |
| C(3)-C(4)-C(5)-B(2)     | -177.9(3)  |
| B(1)-C(4)-C(5)-B(2)     | 62.7(4)    |
| N(2)-B(2)-C(5)-C(4)     | 118.0(4)   |
| N(1)-B(2)-C(5)-C(4)     | -62.7(5)   |
| B(2)-N(1)-C(6)-C(7)     | 179.3(4)   |
| B(2)-N(1)-C(6)-C(15)    | 0.2(5)     |
| N(1)-C(6)-C(7)-C(8)     | 179.5(4)   |
| C(15)-C(6)-C(7)-C(8)    | -1.4(6)    |
| C(6)-C(7)-C(8)-C(9)     | 1.3(6)     |
| C(7)-C(8)-C(9)-C(10)    | -0.3(7)    |
| C(8)-C(9)-C(10)-C(11)   | 179.8(4)   |
| C(8)-C(9)-C(10)-C(15)   | -0.5(6)    |
| C(9)-C(10)-C(11)-C(12)  | -179.9(4)  |
| C(15)-C(10)-C(11)-C(12) | 0.4(6)     |
| C(10)-C(11)-C(12)-C(13) | -0.6(6)    |
| C(11)-C(12)-C(13)-C(14) | 0.4(6)     |

|                         |           |
|-------------------------|-----------|
| C(12)-C(13)-C(14)-N(2)  | 179.9(4)  |
| C(12)-C(13)-C(14)-C(15) | 0.0(6)    |
| B(2)-N(2)-C(14)-C(13)   | -179.2(4) |
| B(2)-N(2)-C(14)-C(15)   | 0.6(5)    |
| C(13)-C(14)-C(15)-C(10) | -0.2(5)   |
| N(2)-C(14)-C(15)-C(10)  | 180.0(3)  |
| C(13)-C(14)-C(15)-C(6)  | 179.7(3)  |
| N(2)-C(14)-C(15)-C(6)   | -0.2(5)   |
| C(9)-C(10)-C(15)-C(14)  | -179.7(3) |
| C(11)-C(10)-C(15)-C(14) | 0.0(5)    |
| C(9)-C(10)-C(15)-C(6)   | 0.4(5)    |
| C(11)-C(10)-C(15)-C(6)  | -179.9(3) |
| C(7)-C(6)-C(15)-C(14)   | -179.3(3) |
| N(1)-C(6)-C(15)-C(14)   | -0.2(5)   |
| C(7)-C(6)-C(15)-C(10)   | 0.5(5)    |
| N(1)-C(6)-C(15)-C(10)   | 179.7(3)  |
| B(1)-O(1)-C(16)-C(18)   | 129.1(4)  |
| B(1)-O(1)-C(16)-C(19)   | -112.7(4) |
| B(1)-O(1)-C(16)-C(17)   | 6.5(4)    |
| B(1)-O(2)-C(17)-C(21)   | 132.6(4)  |
| B(1)-O(2)-C(17)-C(20)   | -111.2(4) |
| B(1)-O(2)-C(17)-C(16)   | 9.0(4)    |
| O(1)-C(16)-C(17)-O(2)   | -9.2(3)   |
| C(18)-C(16)-C(17)-O(2)  | -126.6(4) |
| C(19)-C(16)-C(17)-O(2)  | 105.1(4)  |
| O(1)-C(16)-C(17)-C(21)  | -126.2(4) |
| C(18)-C(16)-C(17)-C(21) | 116.4(5)  |
| C(19)-C(16)-C(17)-C(21) | -11.9(5)  |
| O(1)-C(16)-C(17)-C(20)  | 106.0(4)  |
| C(18)-C(16)-C(17)-C(20) | -11.4(5)  |
| C(19)-C(16)-C(17)-C(20) | -139.7(4) |
| C(38)-O(3)-B(3)-O(4)    | -2.0(4)   |
| C(38)-O(3)-B(3)-C(26)   | 178.4(3)  |
| C(39)-O(4)-B(3)-O(3)    | -8.3(4)   |
| C(39)-O(4)-B(3)-C(26)   | 171.3(3)  |
| C(36)-N(4)-B(4)-N(3)    | -0.1(5)   |

|                         |           |
|-------------------------|-----------|
| C(36)-N(4)-B(4)-C(27)   | -179.1(3) |
| C(28)-N(3)-B(4)-N(4)    | 0.4(5)    |
| C(28)-N(3)-B(4)-C(27)   | 179.3(3)  |
| C(23)-C(24)-C(25)-C(26) | 117.6(7)  |
| C(24)-C(25)-C(26)-C(44) | 64.6(5)   |
| C(24)-C(25)-C(26)-C(27) | -176.5(4) |
| C(24)-C(25)-C(26)-B(3)  | -55.3(5)  |
| O(3)-B(3)-C(26)-C(44)   | -21.7(5)  |
| O(4)-B(3)-C(26)-C(44)   | 158.7(3)  |
| O(3)-B(3)-C(26)-C(25)   | 97.6(4)   |
| O(4)-B(3)-C(26)-C(25)   | -82.0(4)  |
| O(3)-B(3)-C(26)-C(27)   | -143.2(4) |
| O(4)-B(3)-C(26)-C(27)   | 37.2(5)   |
| C(44)-C(26)-C(27)-B(4)  | -57.9(4)  |
| C(25)-C(26)-C(27)-B(4)  | -176.7(3) |
| B(3)-C(26)-C(27)-B(4)   | 64.0(4)   |
| N(4)-B(4)-C(27)-C(26)   | 115.6(4)  |
| N(3)-B(4)-C(27)-C(26)   | -63.2(5)  |
| B(4)-N(3)-C(28)-C(29)   | 179.4(4)  |
| B(4)-N(3)-C(28)-C(37)   | -0.2(5)   |
| N(3)-C(28)-C(29)-C(30)  | 179.5(4)  |
| C(37)-C(28)-C(29)-C(30) | -0.9(6)   |
| C(28)-C(29)-C(30)-C(31) | 1.1(6)    |
| C(29)-C(30)-C(31)-C(32) | -0.4(6)   |
| C(30)-C(31)-C(32)-C(33) | -179.4(4) |
| C(30)-C(31)-C(32)-C(37) | -0.3(6)   |
| C(31)-C(32)-C(33)-C(34) | 179.0(4)  |
| C(37)-C(32)-C(33)-C(34) | 0.0(6)    |
| C(32)-C(33)-C(34)-C(35) | 0.5(7)    |
| C(33)-C(34)-C(35)-C(36) | -0.4(7)   |
| C(34)-C(35)-C(36)-N(4)  | 179.9(4)  |
| C(34)-C(35)-C(36)-C(37) | -0.1(6)   |
| B(4)-N(4)-C(36)-C(35)   | 179.7(4)  |
| B(4)-N(4)-C(36)-C(37)   | -0.3(5)   |
| C(33)-C(32)-C(37)-C(36) | -0.4(6)   |
| C(31)-C(32)-C(37)-C(36) | -179.5(3) |



|                         |           |
|-------------------------|-----------|
| C(33)-C(32)-C(37)-C(28) | 179.6(4)  |
| C(31)-C(32)-C(37)-C(28) | 0.5(5)    |
| C(35)-C(36)-C(37)-C(32) | 0.5(5)    |
| N(4)-C(36)-C(37)-C(32)  | -179.5(3) |
| C(35)-C(36)-C(37)-C(28) | -179.5(4) |
| N(4)-C(36)-C(37)-C(28)  | 0.5(5)    |
| C(29)-C(28)-C(37)-C(32) | 0.2(5)    |
| N(3)-C(28)-C(37)-C(32)  | 179.8(3)  |
| C(29)-C(28)-C(37)-C(36) | -179.9(3) |
| N(3)-C(28)-C(37)-C(36)  | -0.3(5)   |
| B(3)-O(3)-C(38)-C(40)   | 135.8(4)  |
| B(3)-O(3)-C(38)-C(41)   | -108.1(4) |
| B(3)-O(3)-C(38)-C(39)   | 10.7(4)   |
| B(3)-O(4)-C(39)-C(43)   | 137.4(4)  |
| B(3)-O(4)-C(39)-C(42)   | -104.1(4) |
| B(3)-O(4)-C(39)-C(38)   | 14.0(4)   |
| O(3)-C(38)-C(39)-O(4)   | -14.6(4)  |
| C(40)-C(38)-C(39)-O(4)  | -134.2(4) |
| C(41)-C(38)-C(39)-O(4)  | 98.8(4)   |
| O(3)-C(38)-C(39)-C(43)  | -132.3(4) |
| C(40)-C(38)-C(39)-C(43) | 108.1(5)  |
| C(41)-C(38)-C(39)-C(43) | -18.9(5)  |
| O(3)-C(38)-C(39)-C(42)  | 99.7(4)   |
| C(40)-C(38)-C(39)-C(42) | -19.8(5)  |
| C(41)-C(38)-C(39)-C(42) | -146.8(4) |

---

Symmetry transformations used to generate equivalent atoms:

**Table S28. Hydrogen bonds for C<sub>22</sub>H<sub>30</sub>B<sub>2</sub>N<sub>2</sub>O<sub>2</sub> [Å and °].**

| D-H...A             | d(D-H)  | d(H...A) | d(D...A) | <(DHA) |
|---------------------|---------|----------|----------|--------|
| N(1)-H(1N)...O(2)   | 0.89(5) | 2.41(5)  | 3.159(4) | 142(4) |
| N(2)-H(2N)...O(2)#1 | 0.86(4) | 2.32(4)  | 3.165(4) | 166(4) |
| N(3)-H(3N)...O(4)   | 0.89(5) | 2.39(5)  | 3.160(4) | 145(4) |
| N(4)-H(4N)...O(4)#2 | 0.86(5) | 2.33(5)  | 3.142(4) | 157(4) |

---

Symmetry transformations used to generate equivalent atoms:

#1  $-x+1, y-1/2, -z+1/2$  #2  $x+1/2, -y+1/2, -z+1$

## 5. NMR Spectra

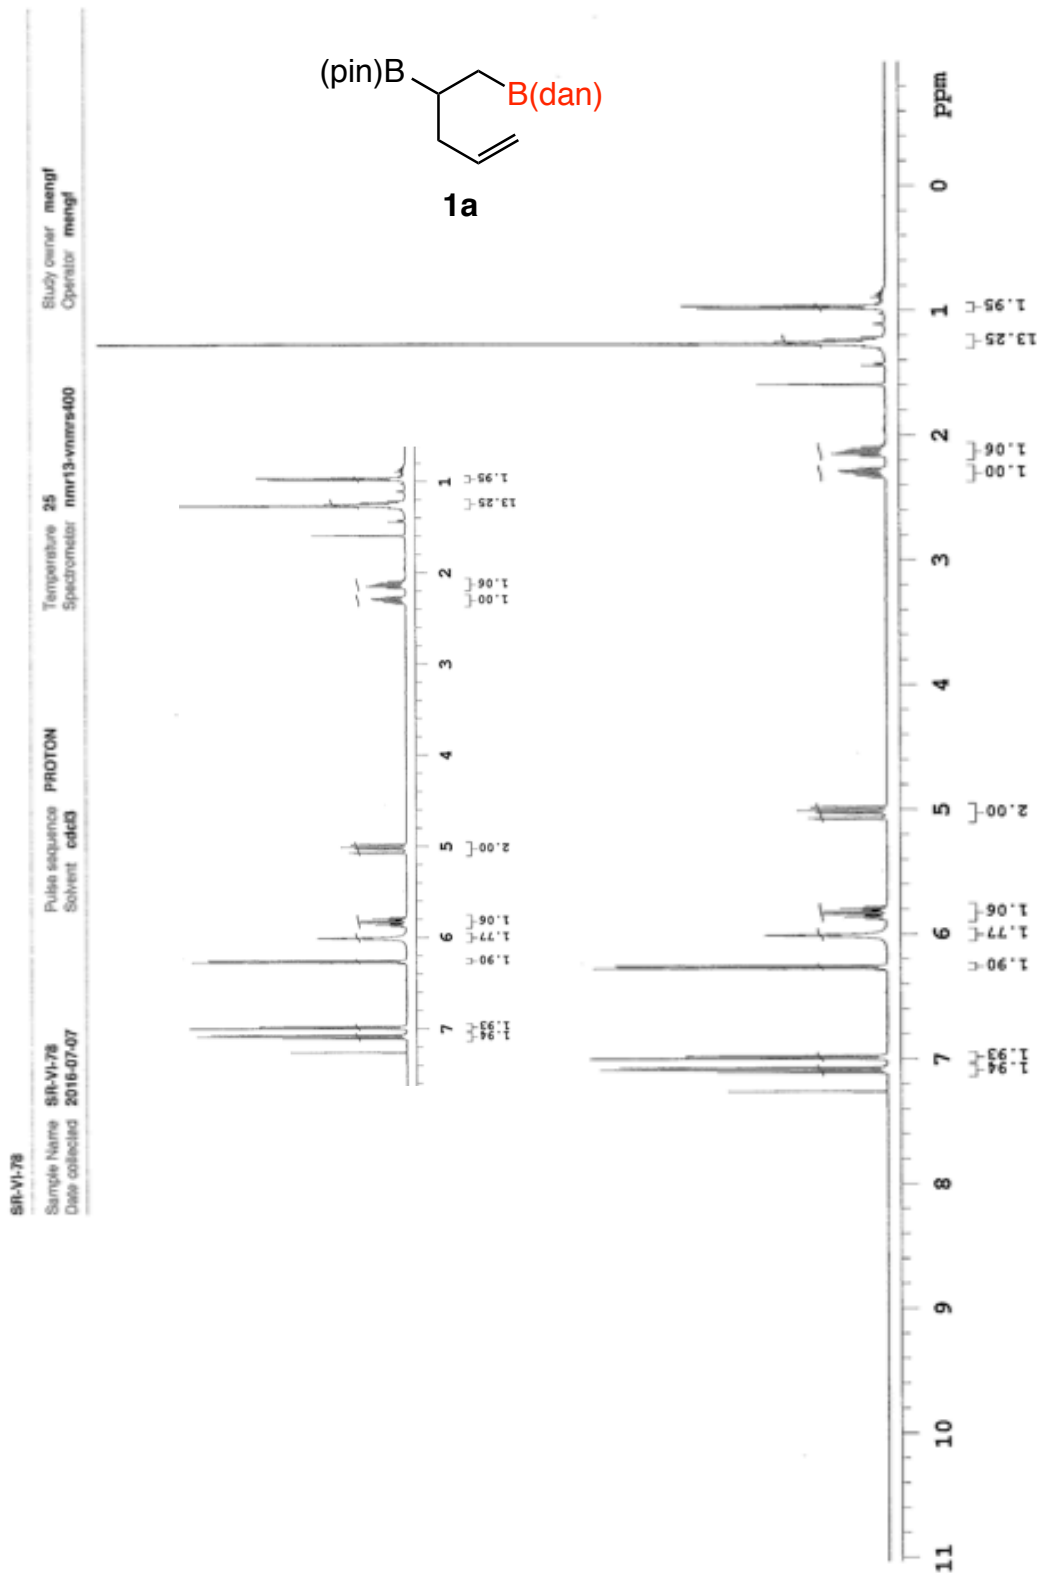

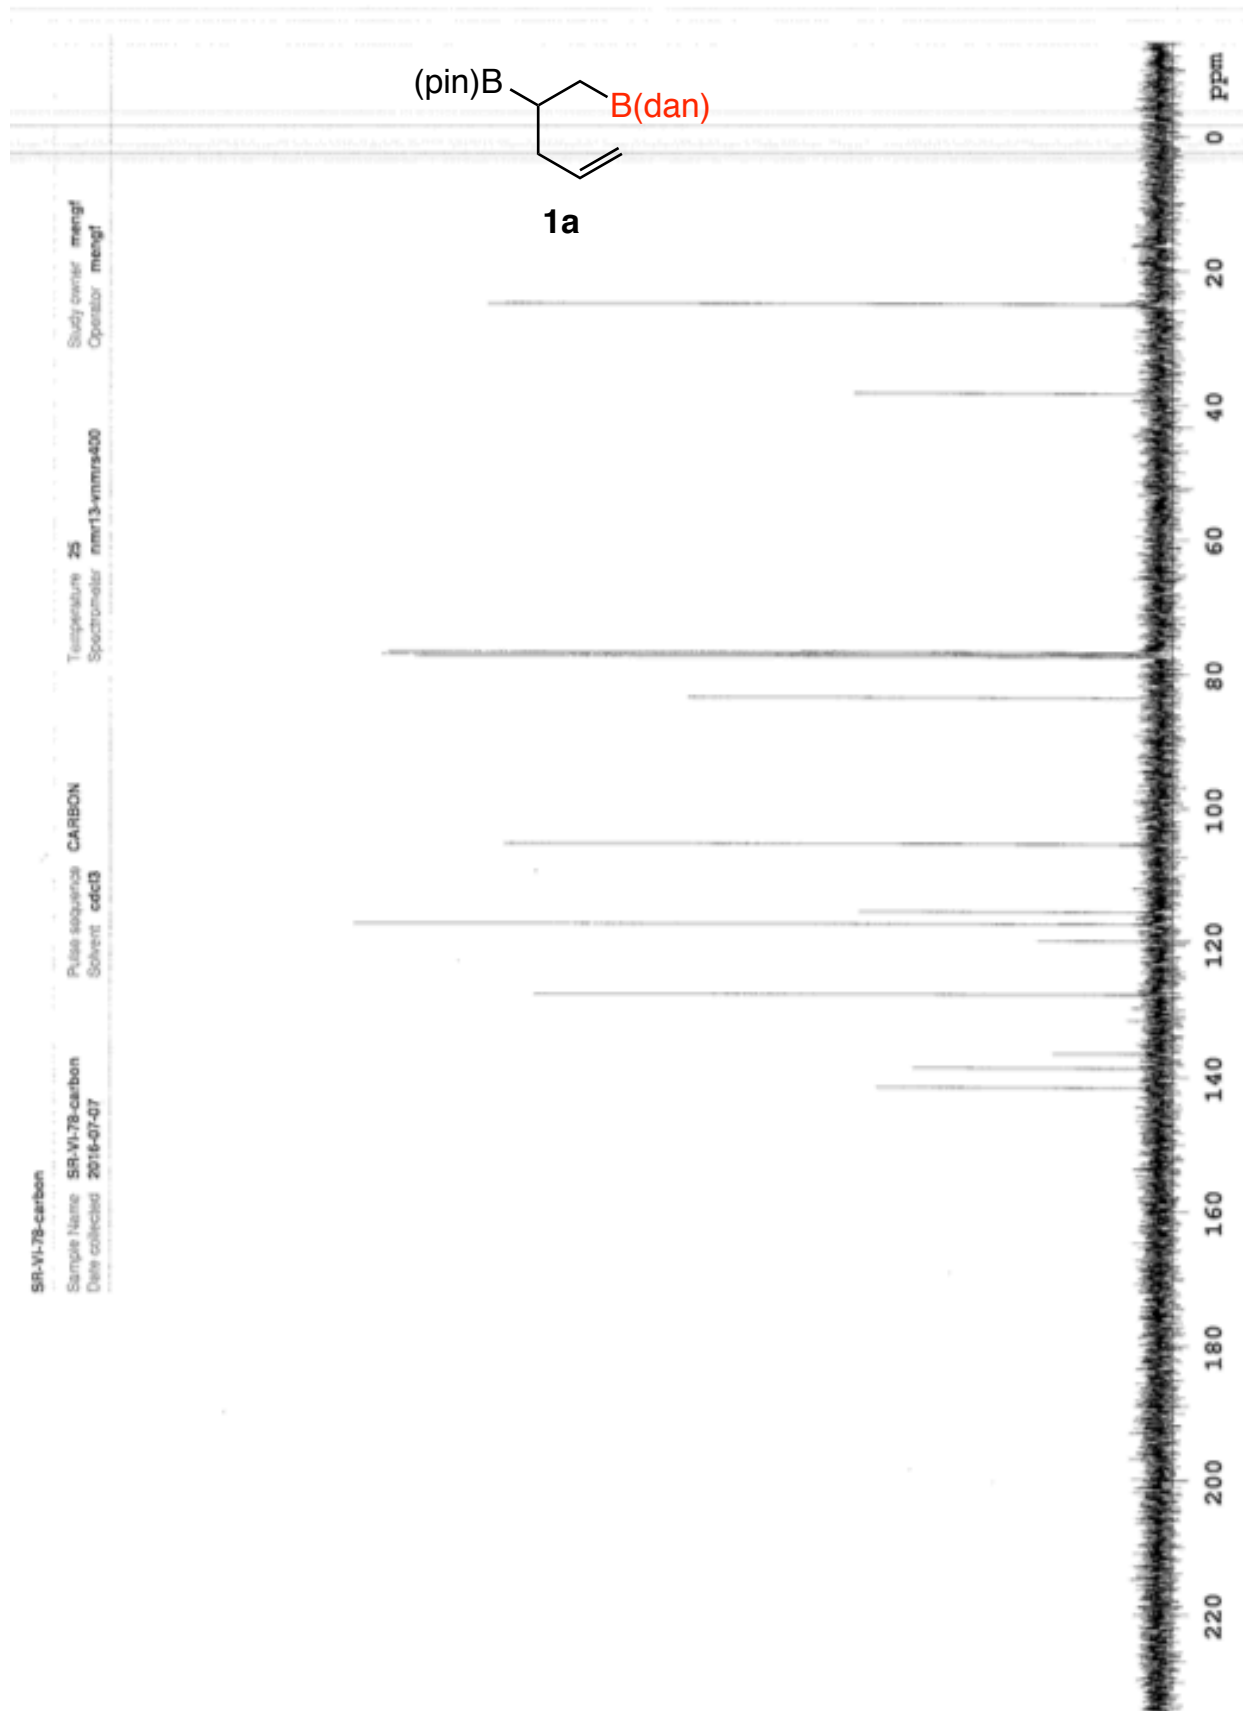

SIR-V-238-rac  
 Sample Name SIR-V-238-rac  
 Date collected 2015-12-15  
 Pulse sequence PROTON  
 Solvent cdcl3  
 Temperature 25  
 Spectrometer nmr14-vnmrs400  
 Study owner Hoveyda  
 Operator Hoveyda

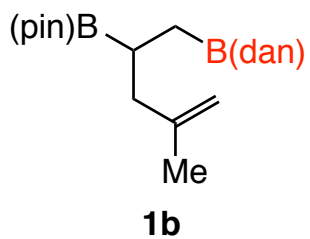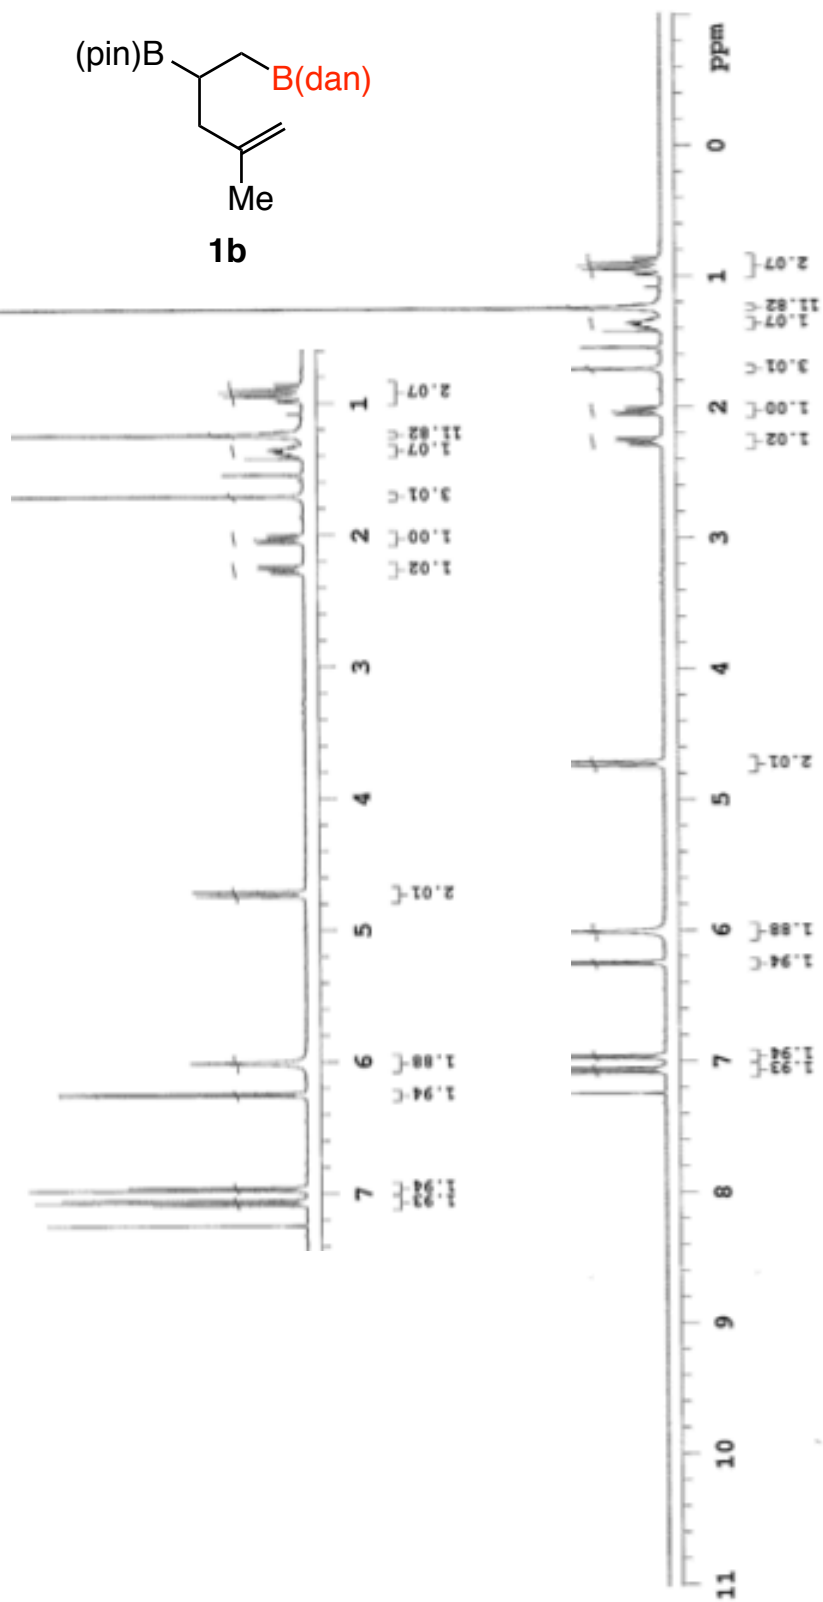

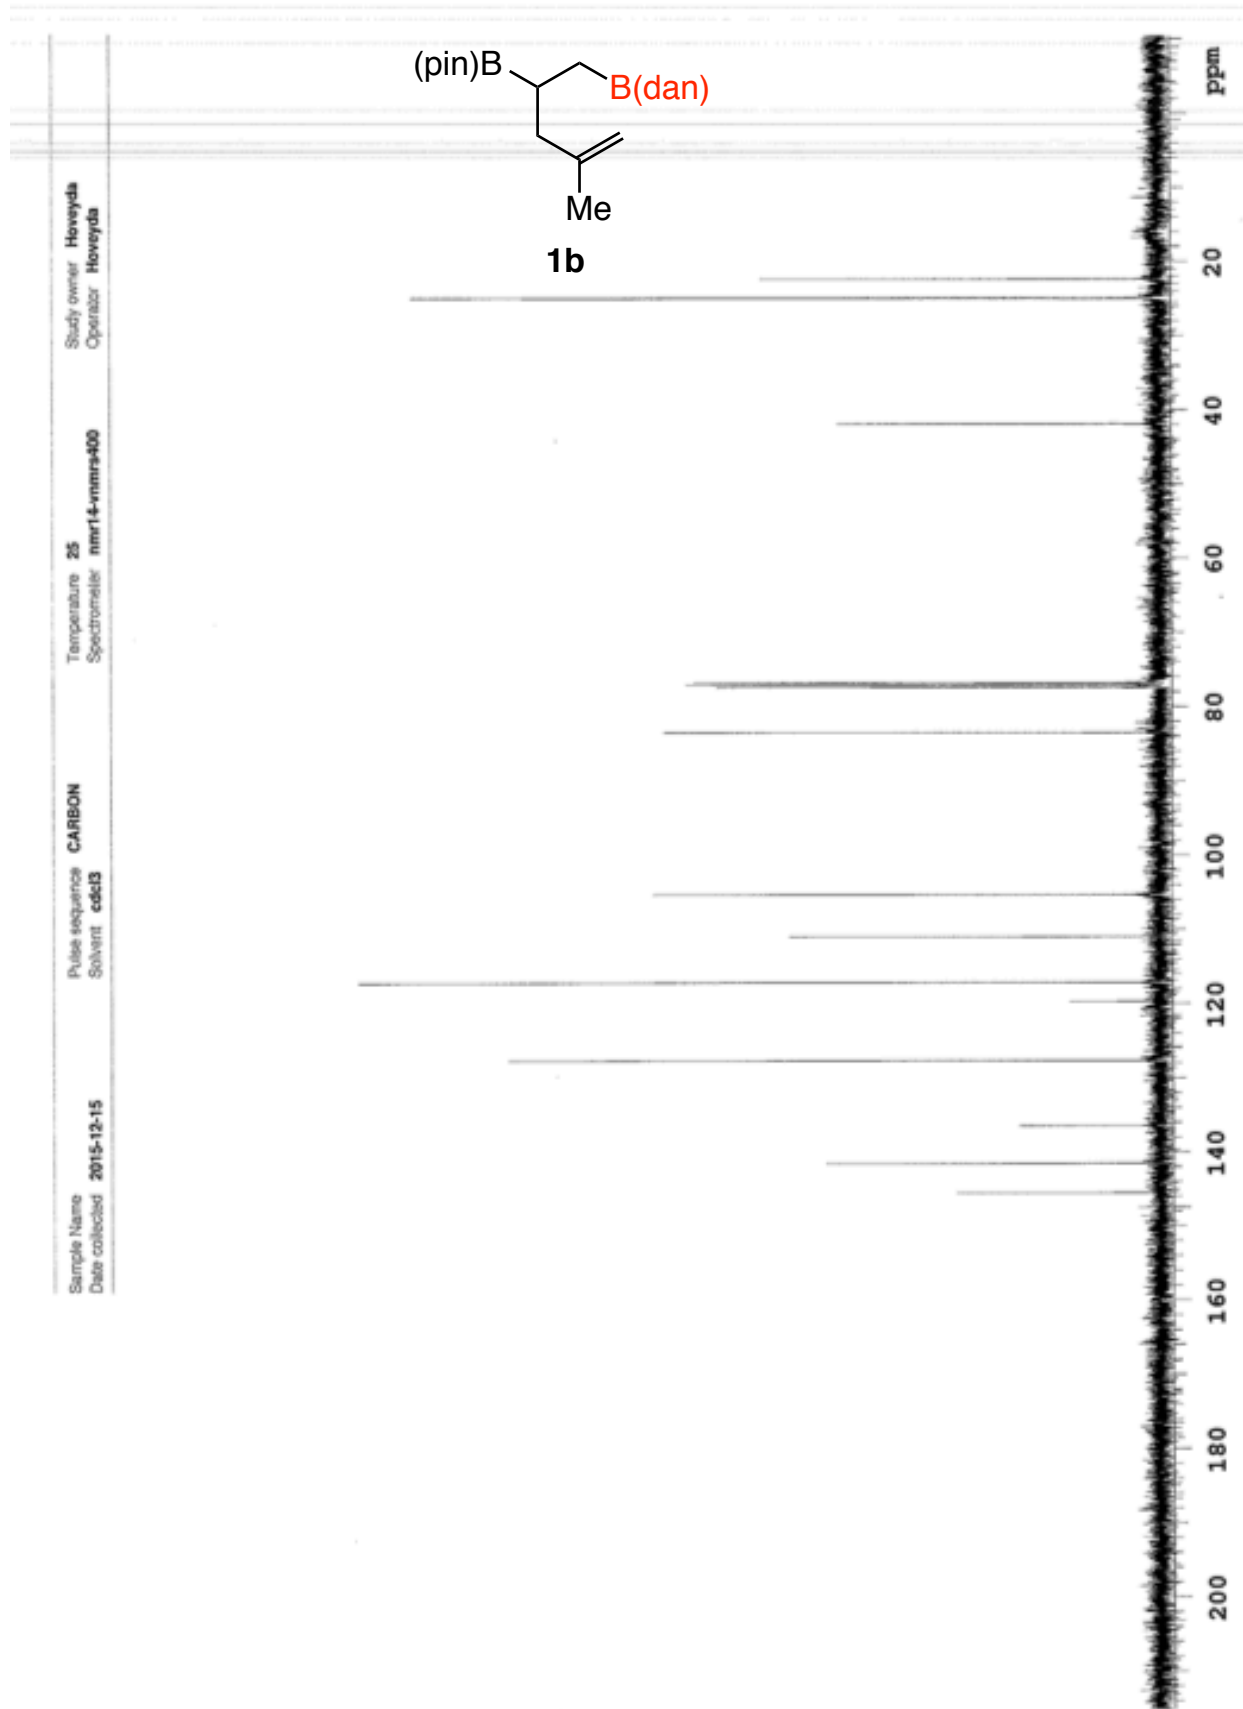

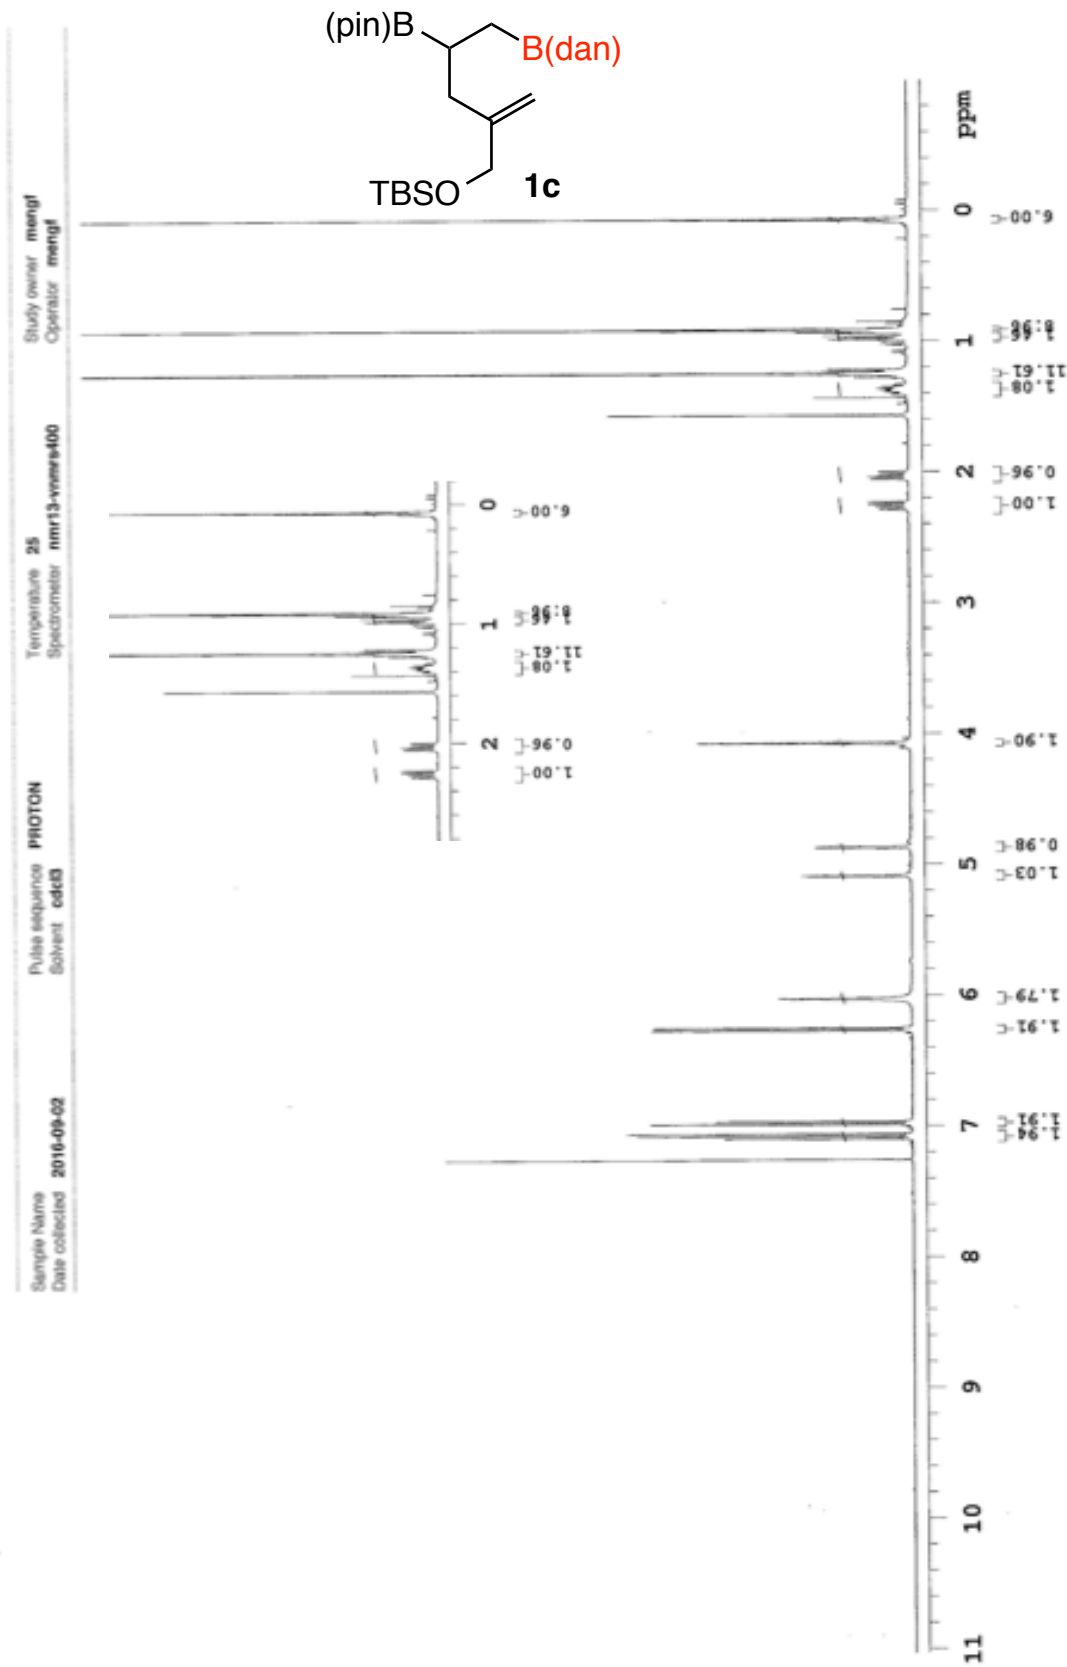

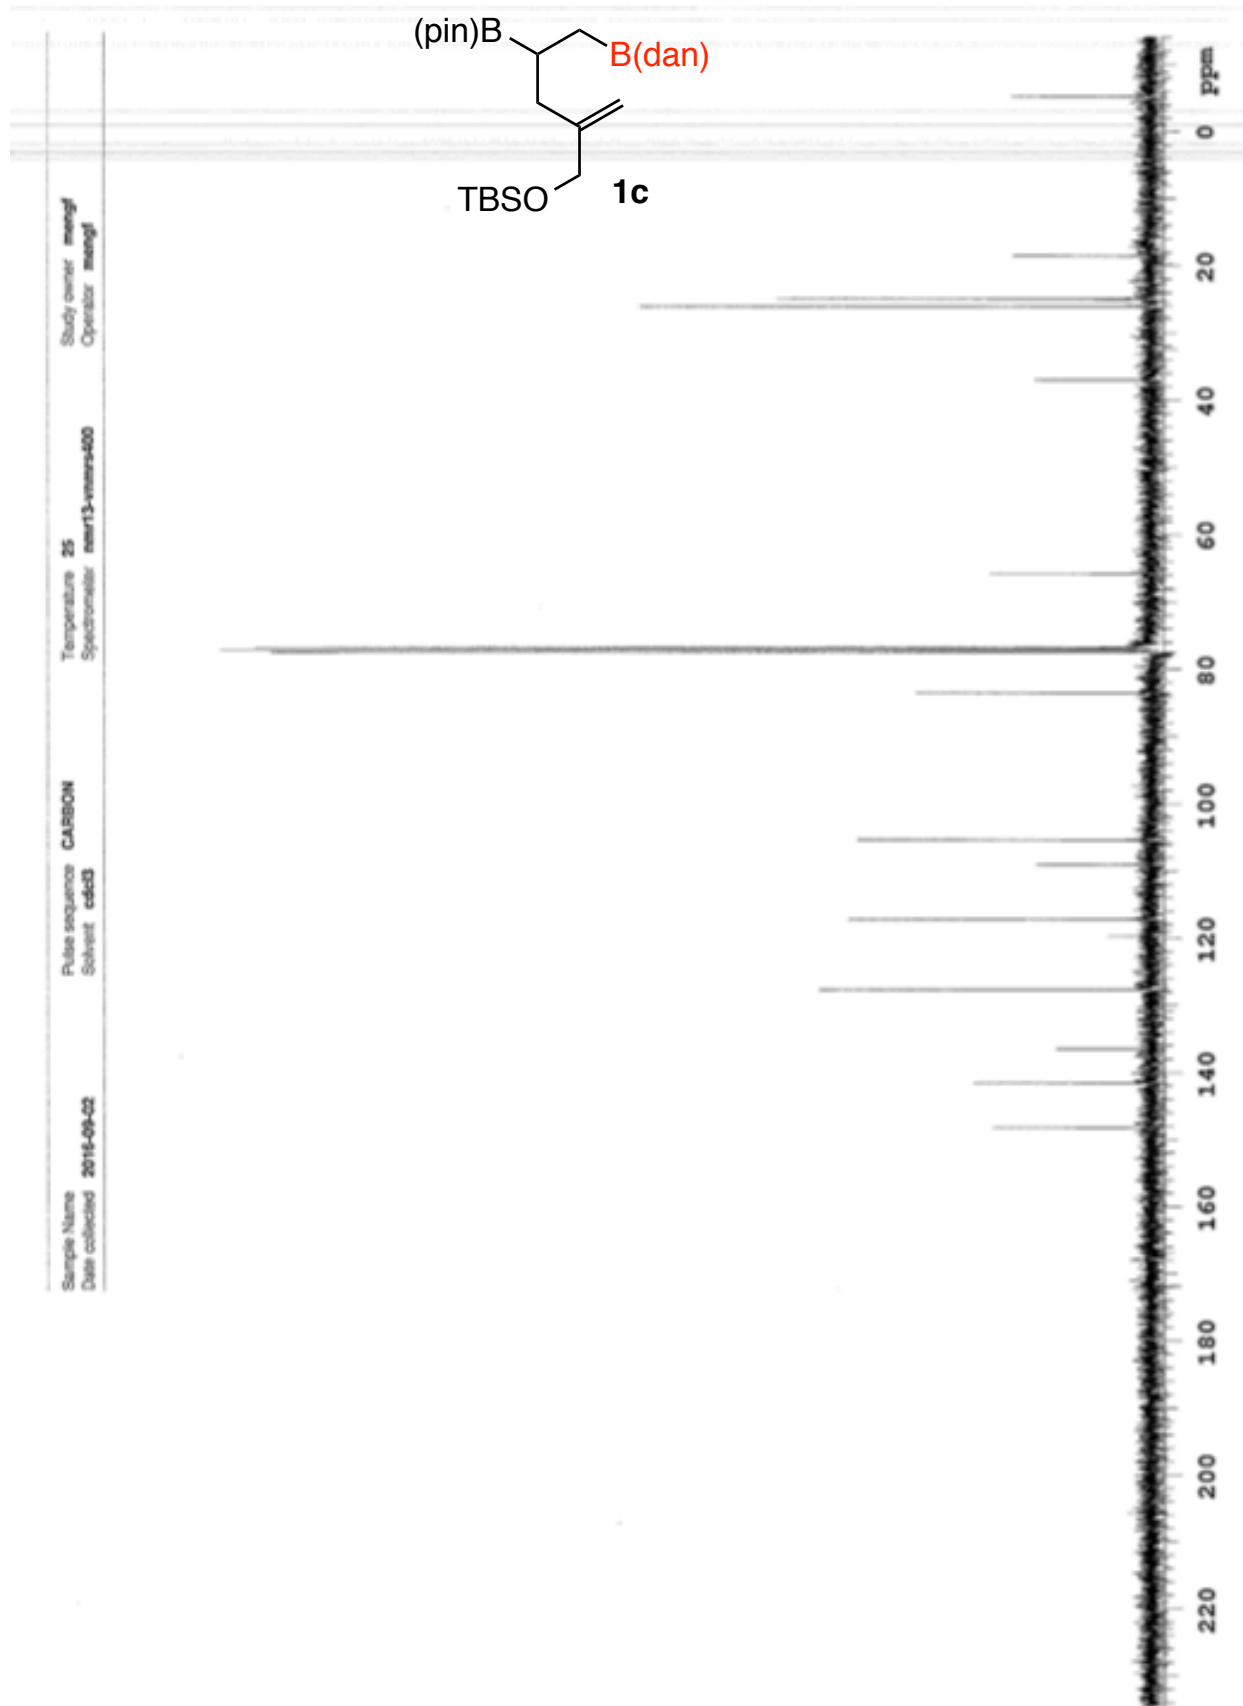



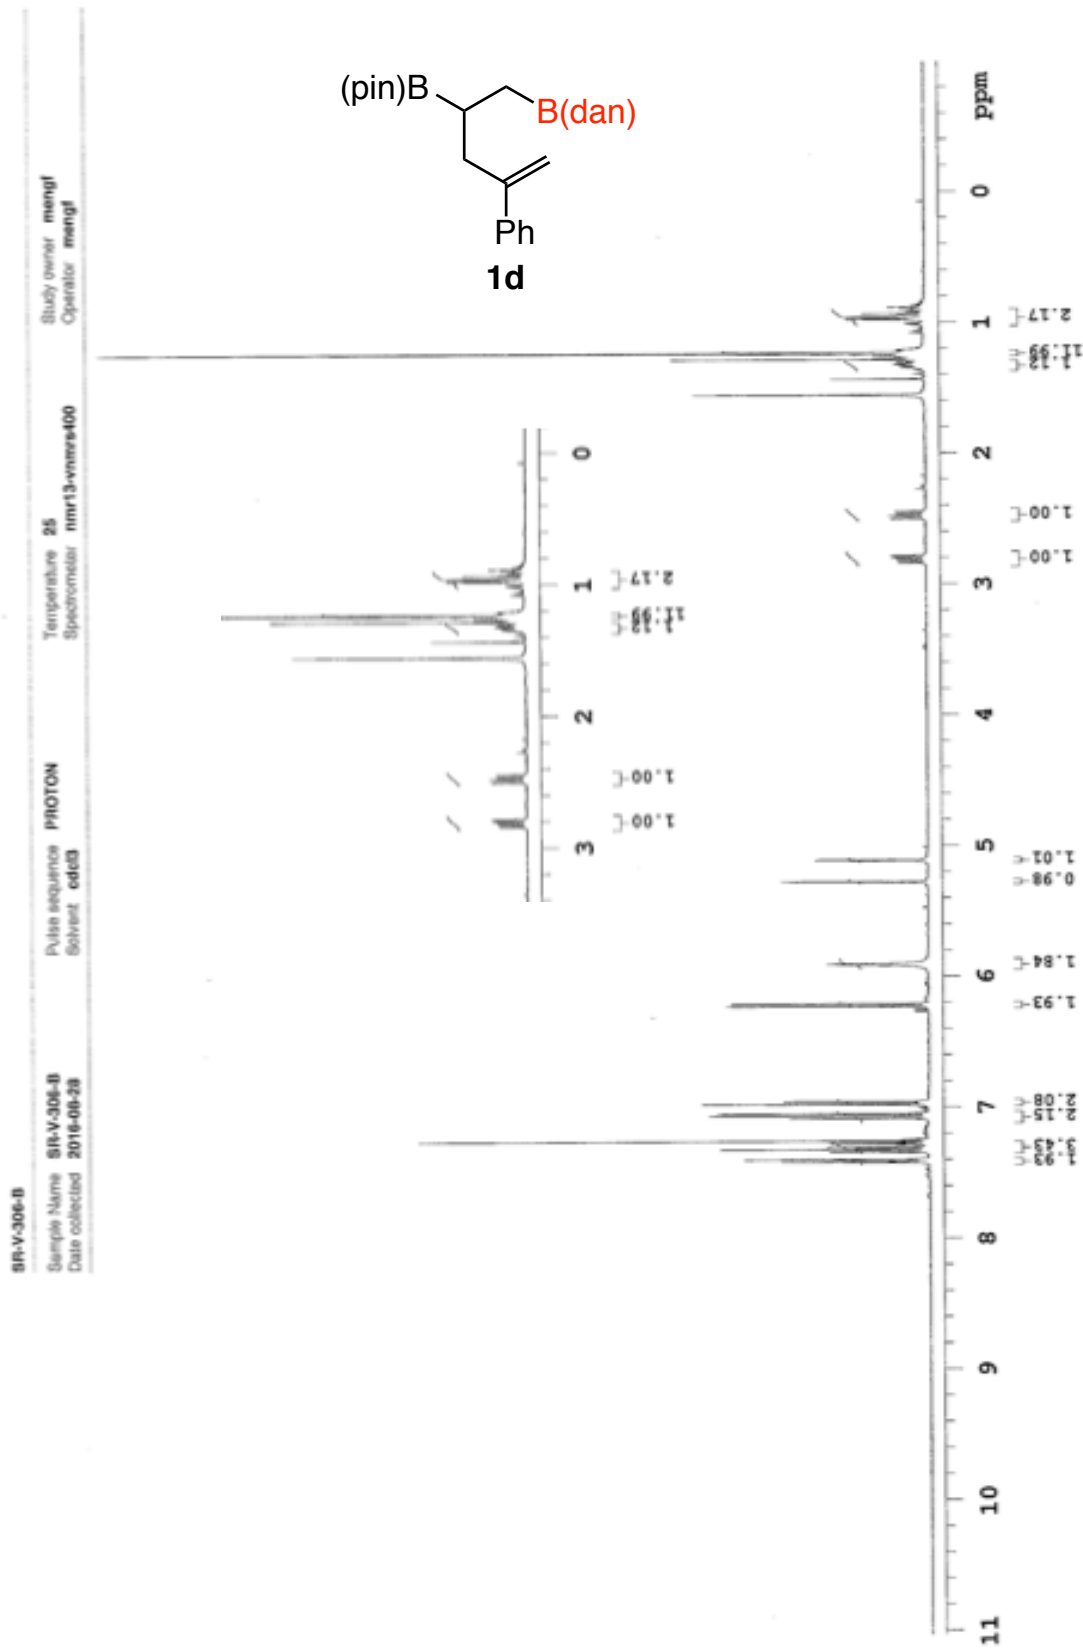

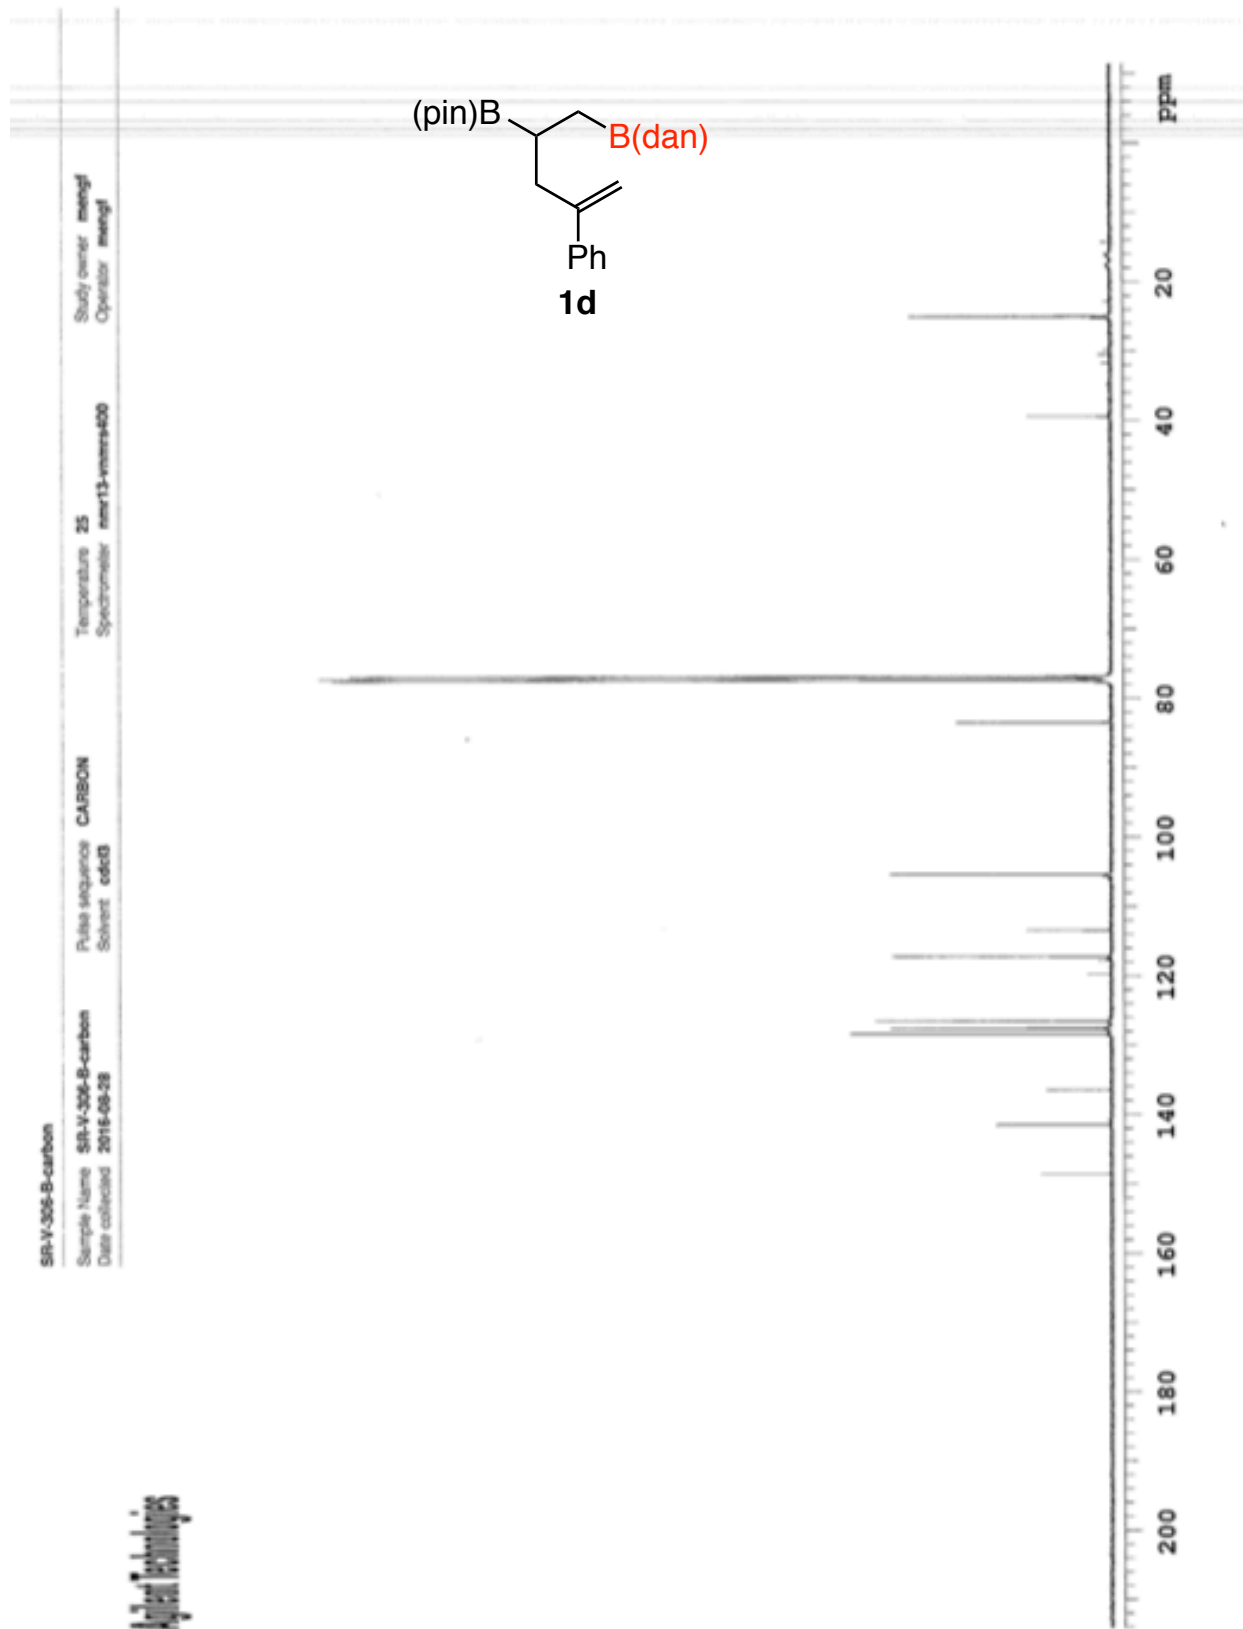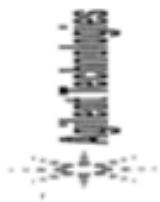

SR-VI-61-B

Sample Name SR-VI-61-B  
Date collected 2016-06-06

Pulse sequence PROTON  
Solvent cdcl3

Temperature 25  
Spectrometer nmr13-vnmr400

Study center mangl  
Operator mangl

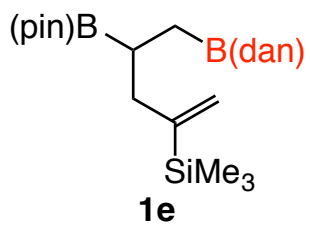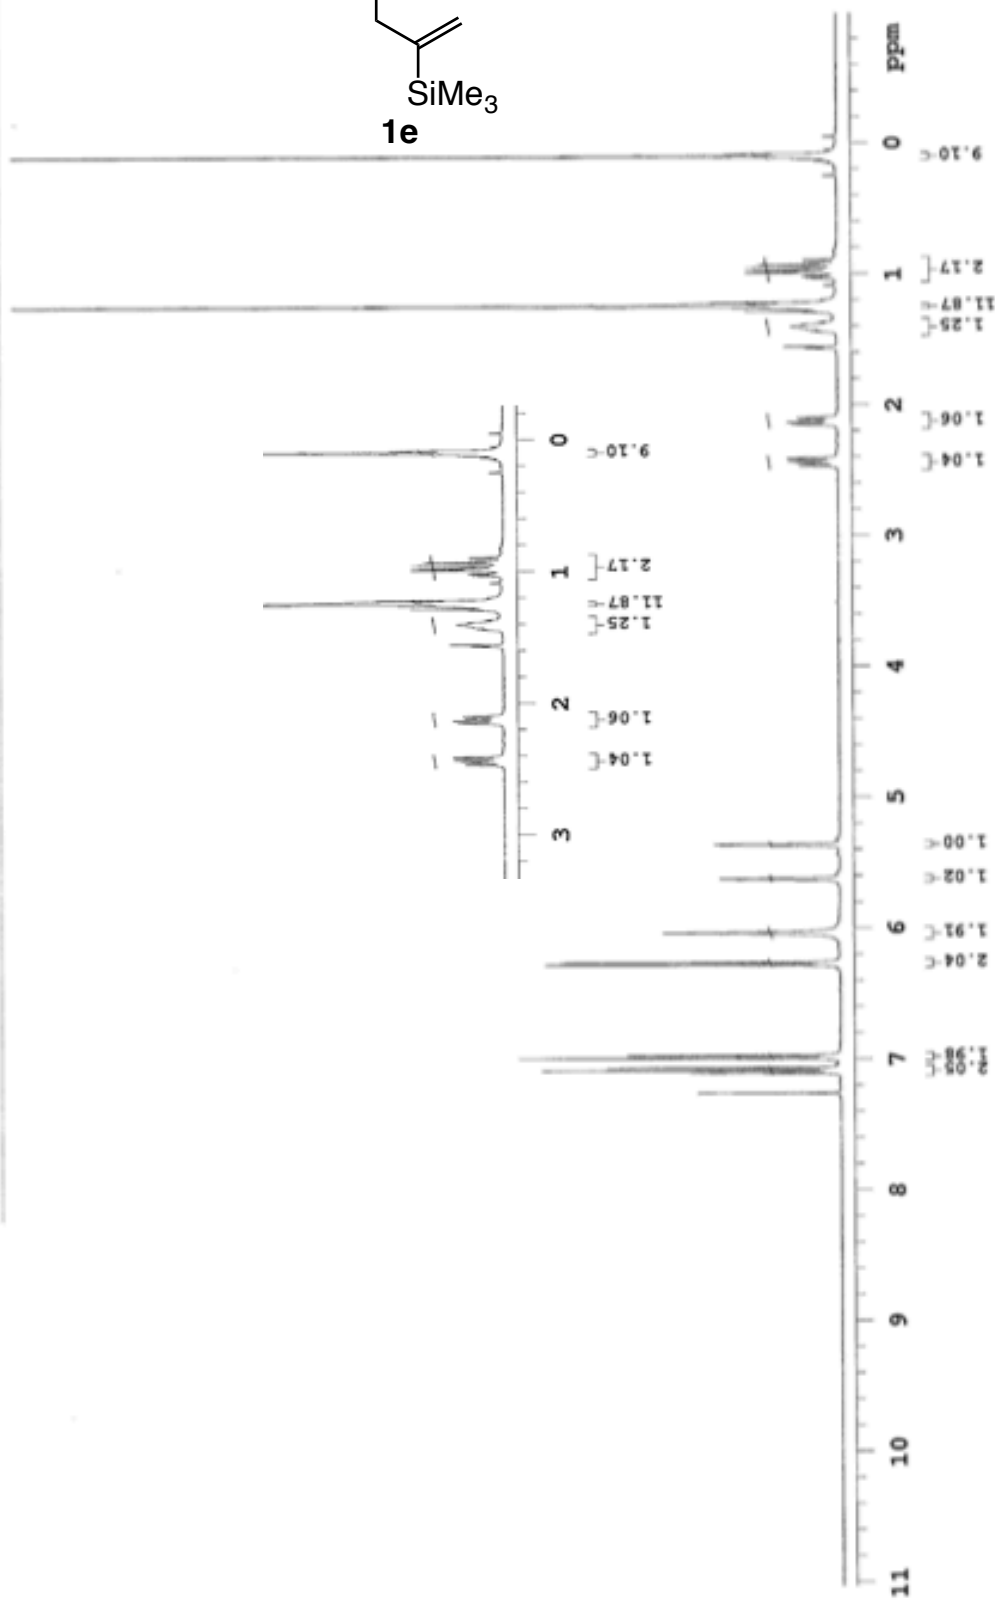

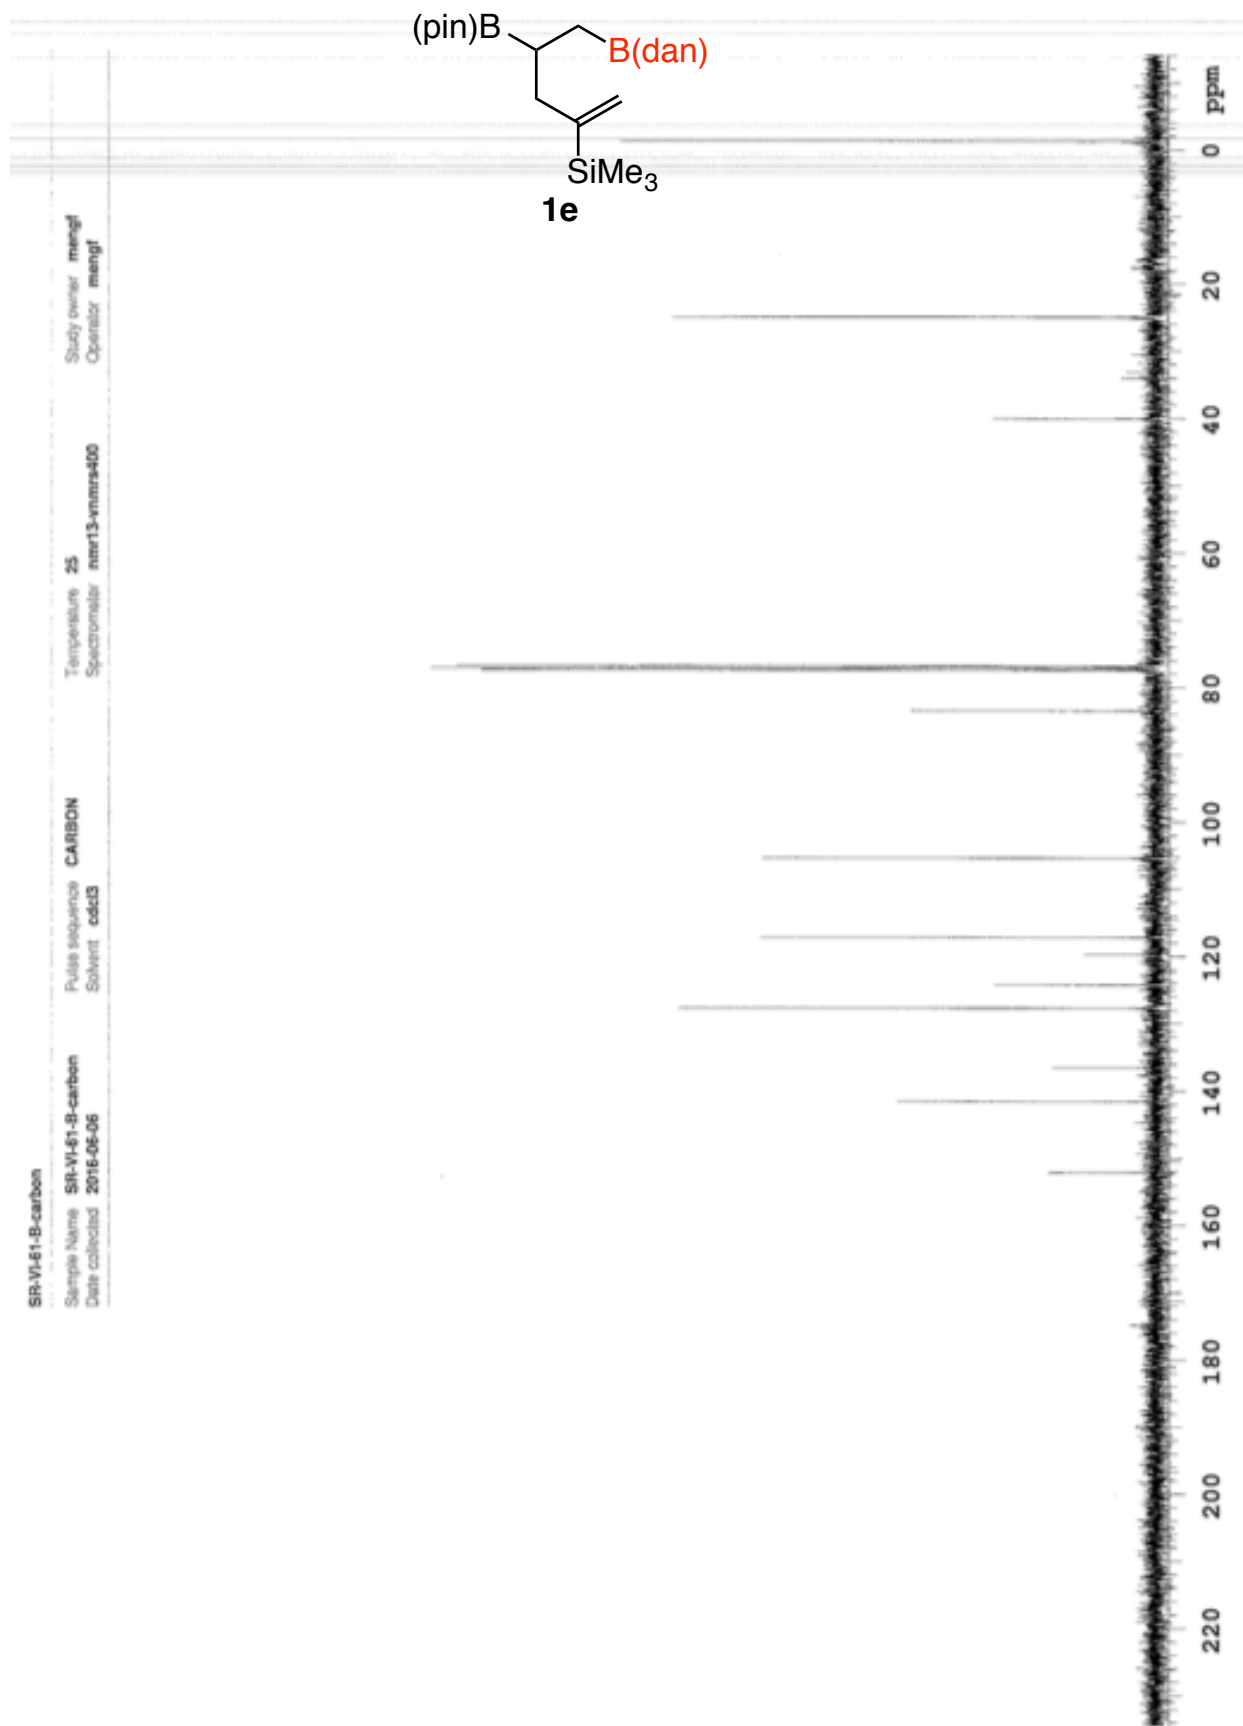

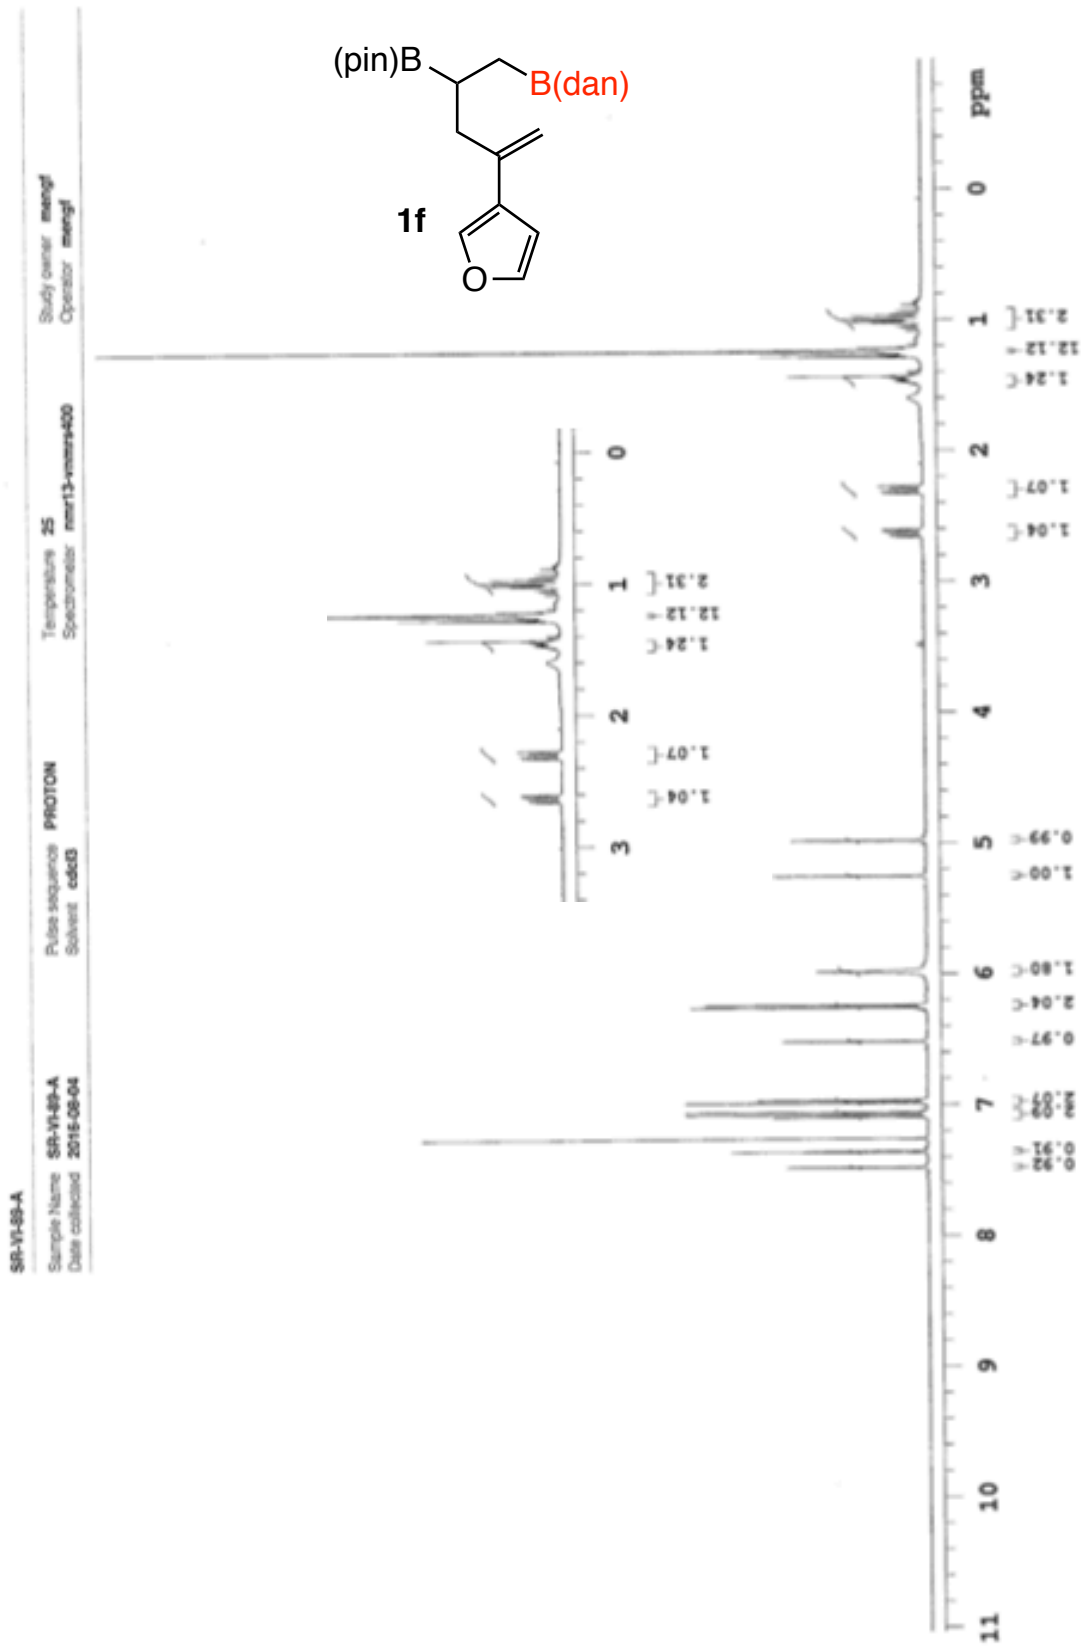

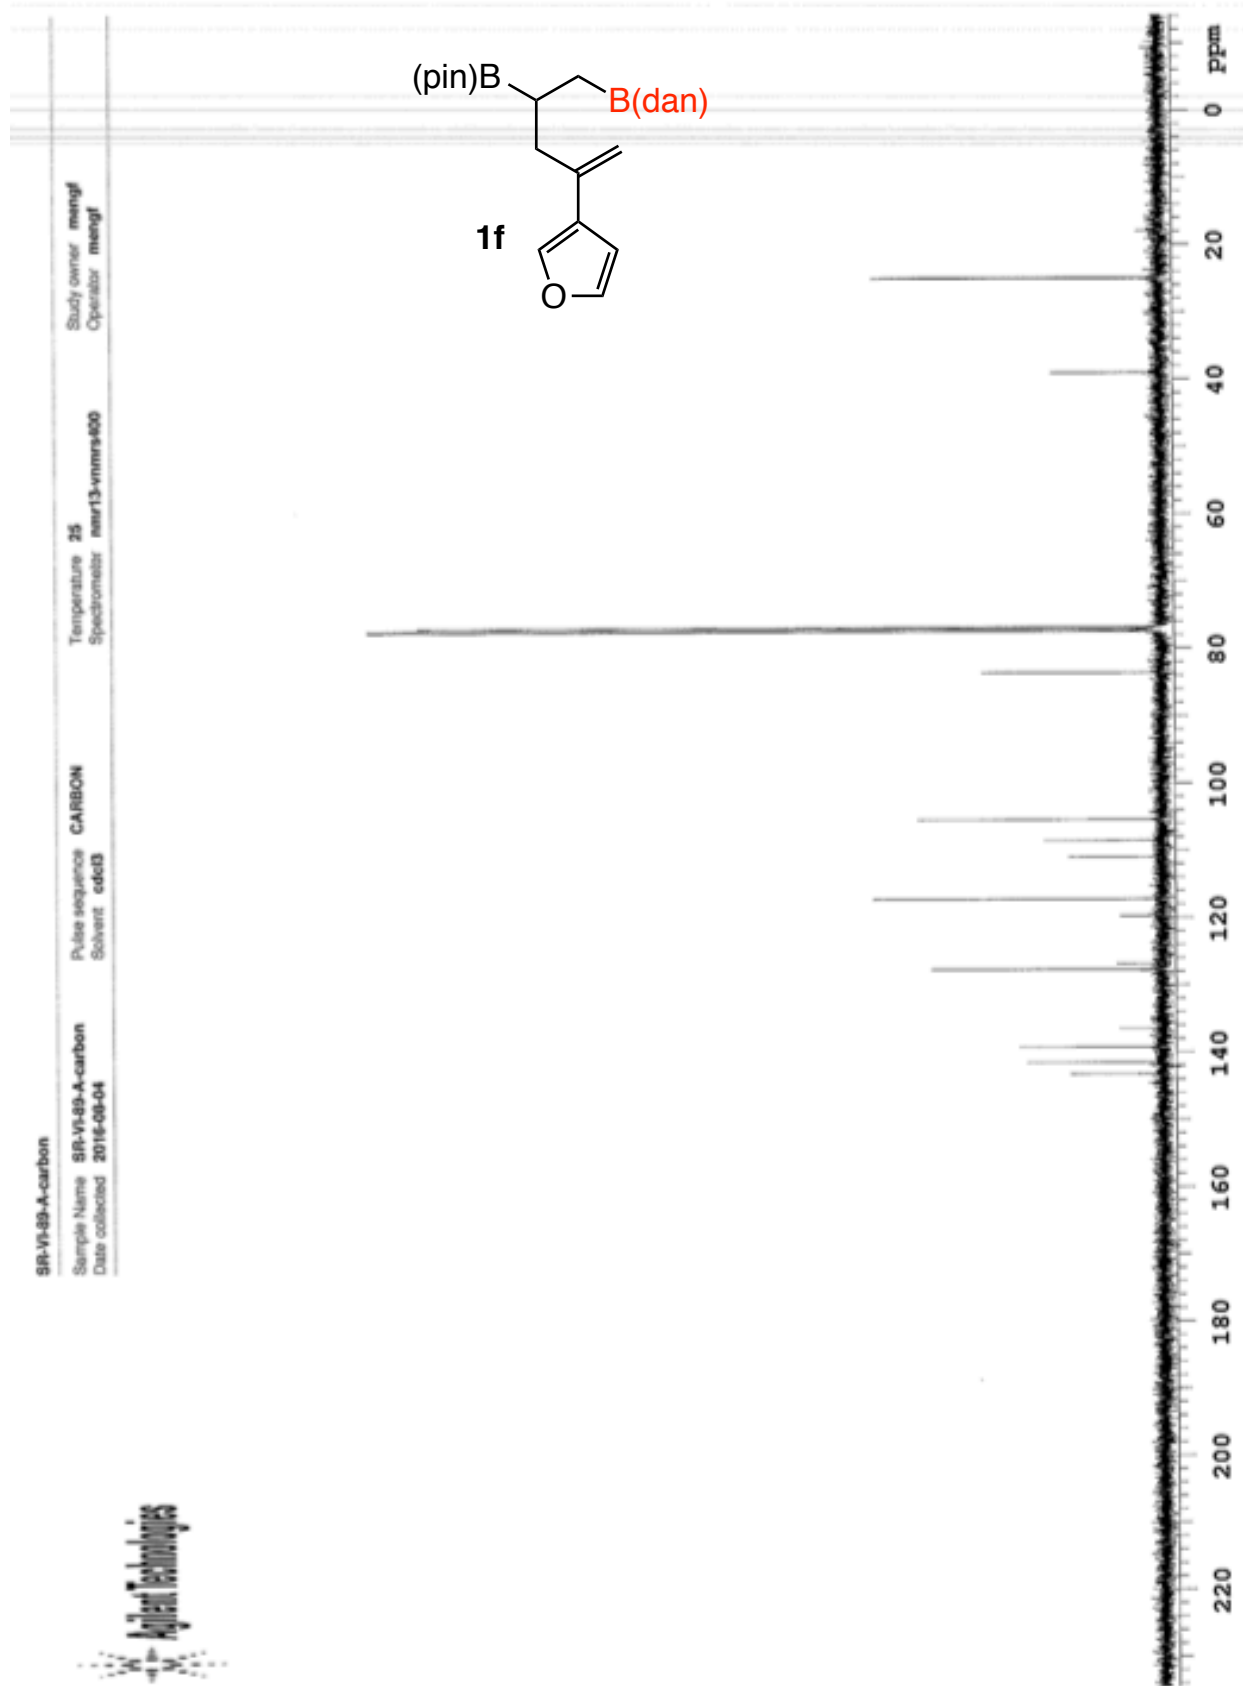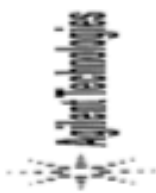

**SR-V-297-B**  
 Sample Name **SR-V-297-B**  
 Date collected **2016-07-19**  
 Pulse sequence **PROTON**  
 Solvent **cdcl3**  
 Temperature **25**  
 Spectrometer **nmr13-vnmrs400**  
 Study owner **manngl**  
 Operator **manngl**

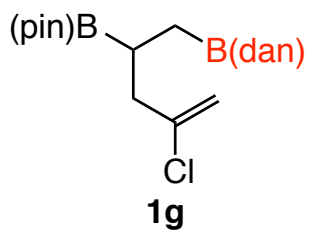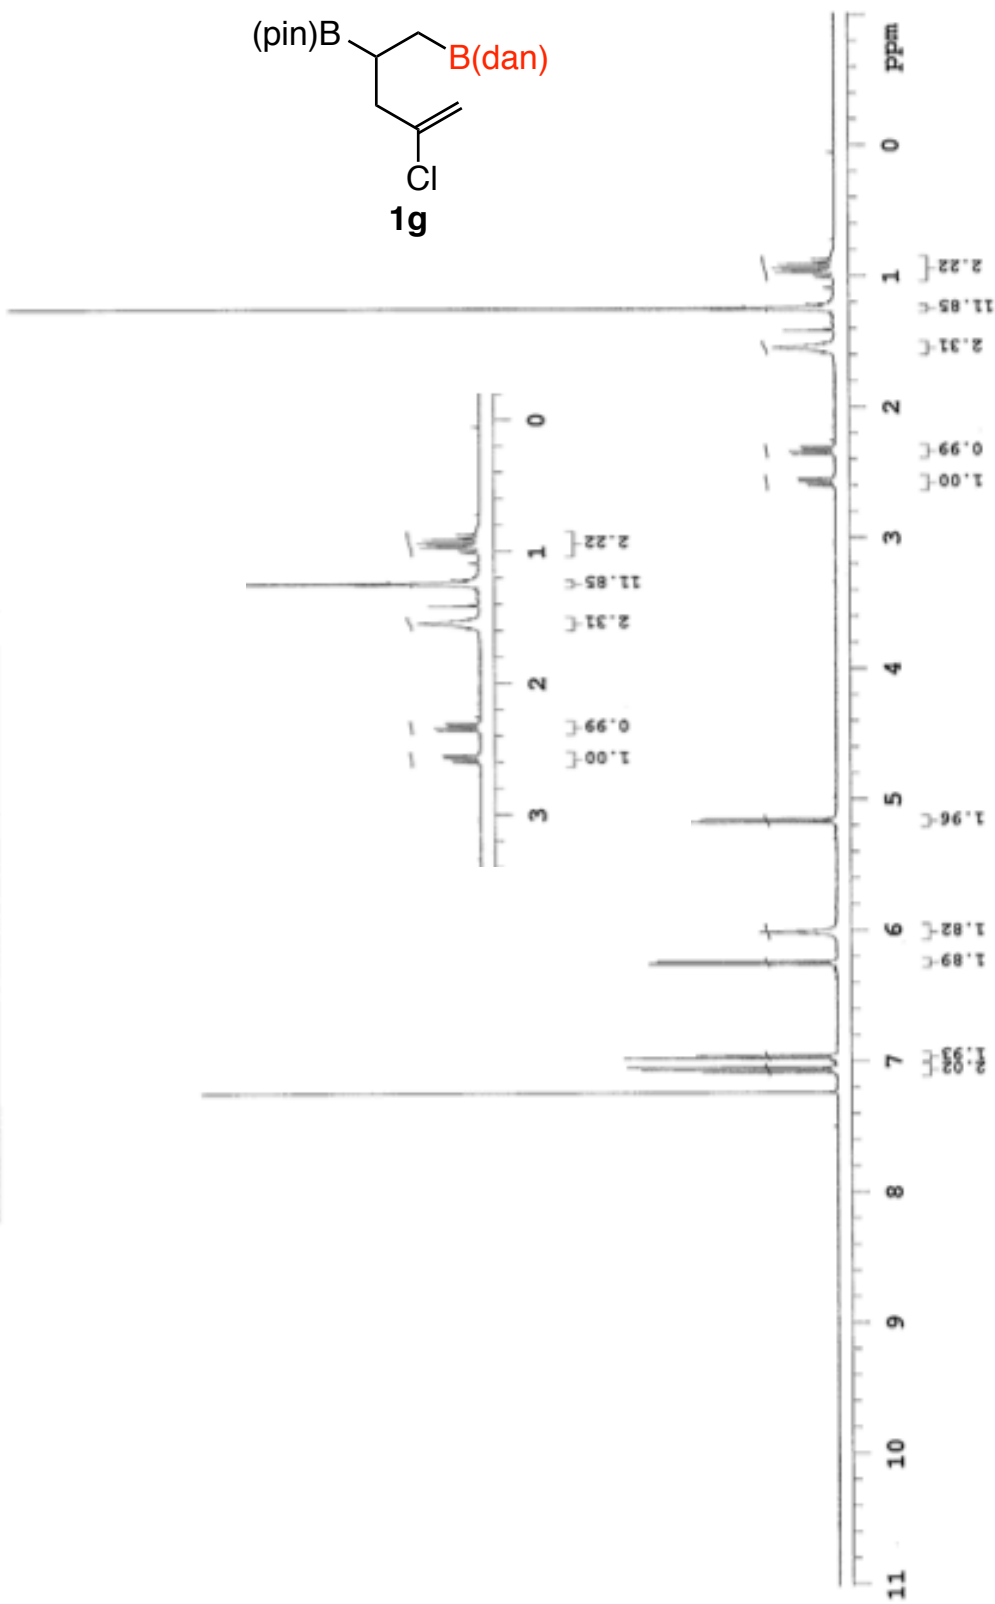

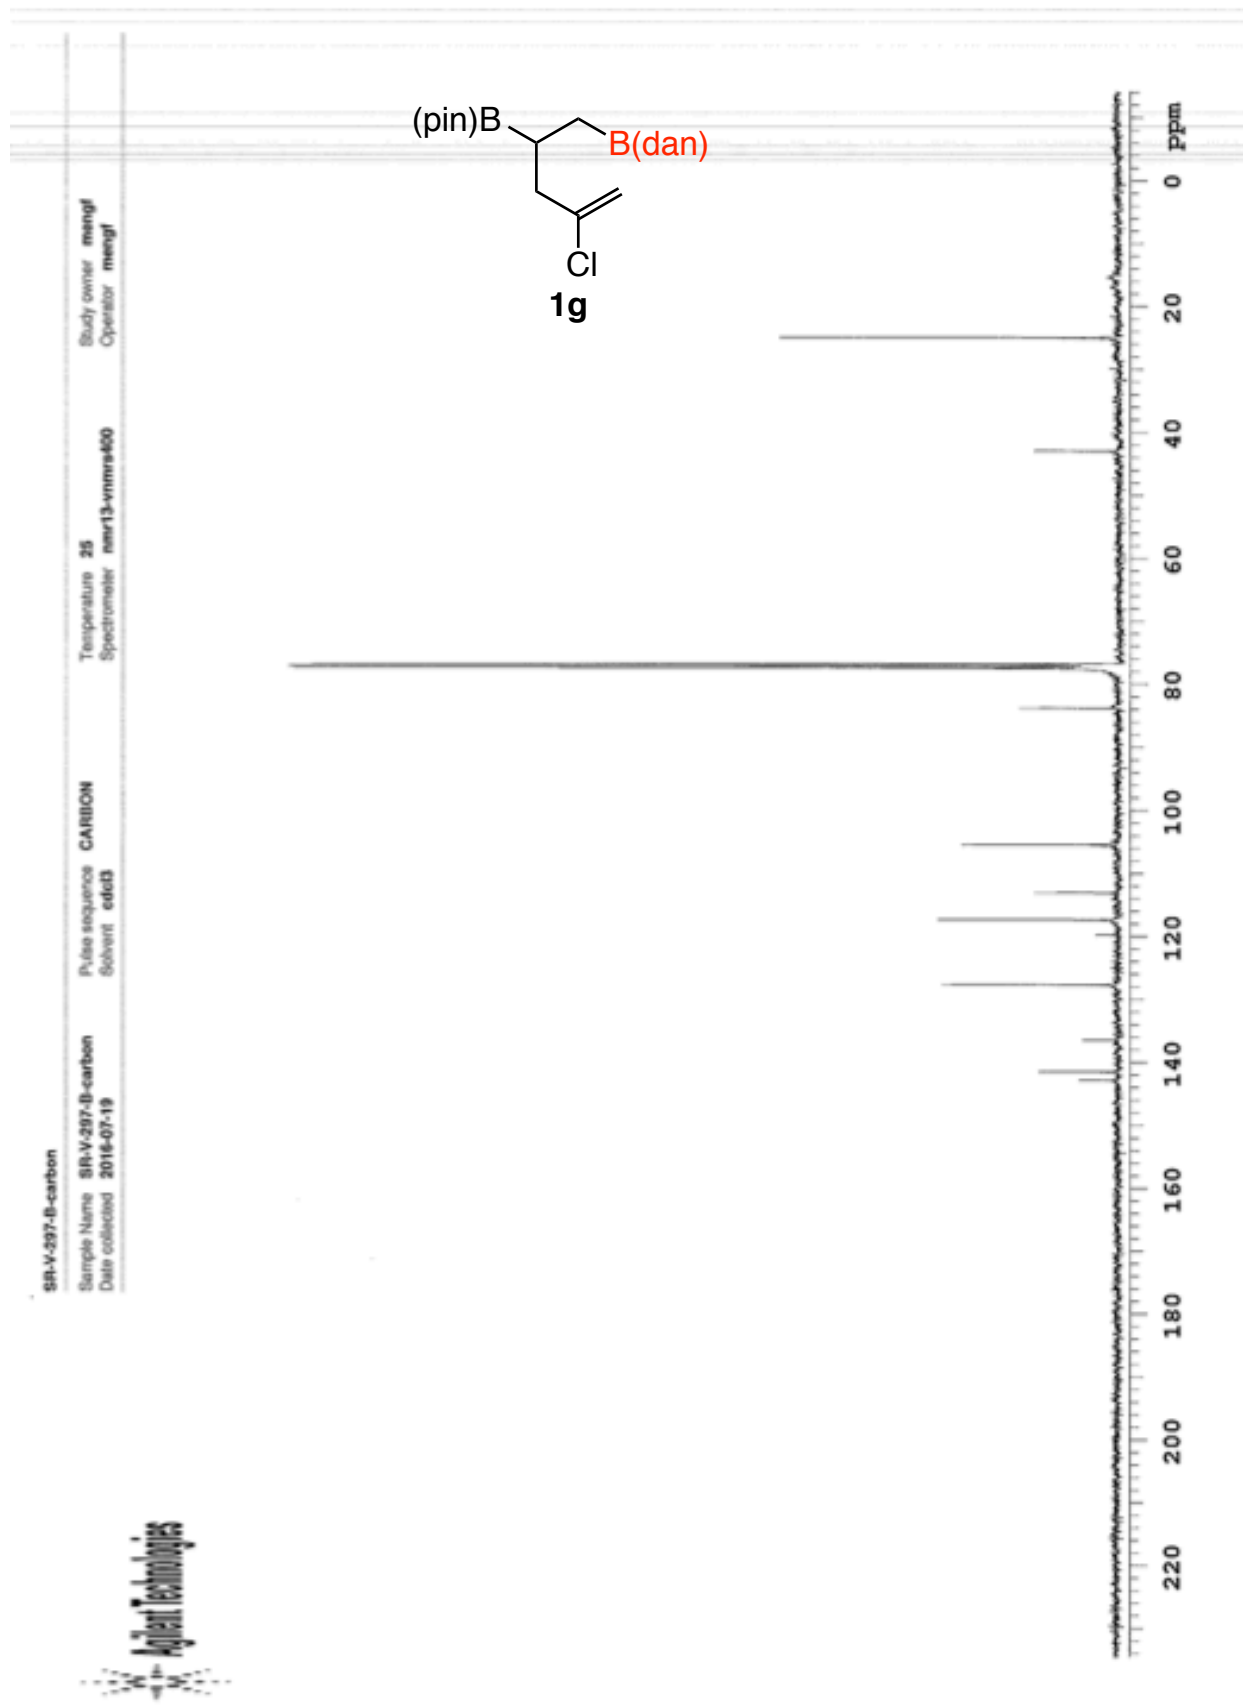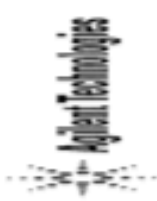



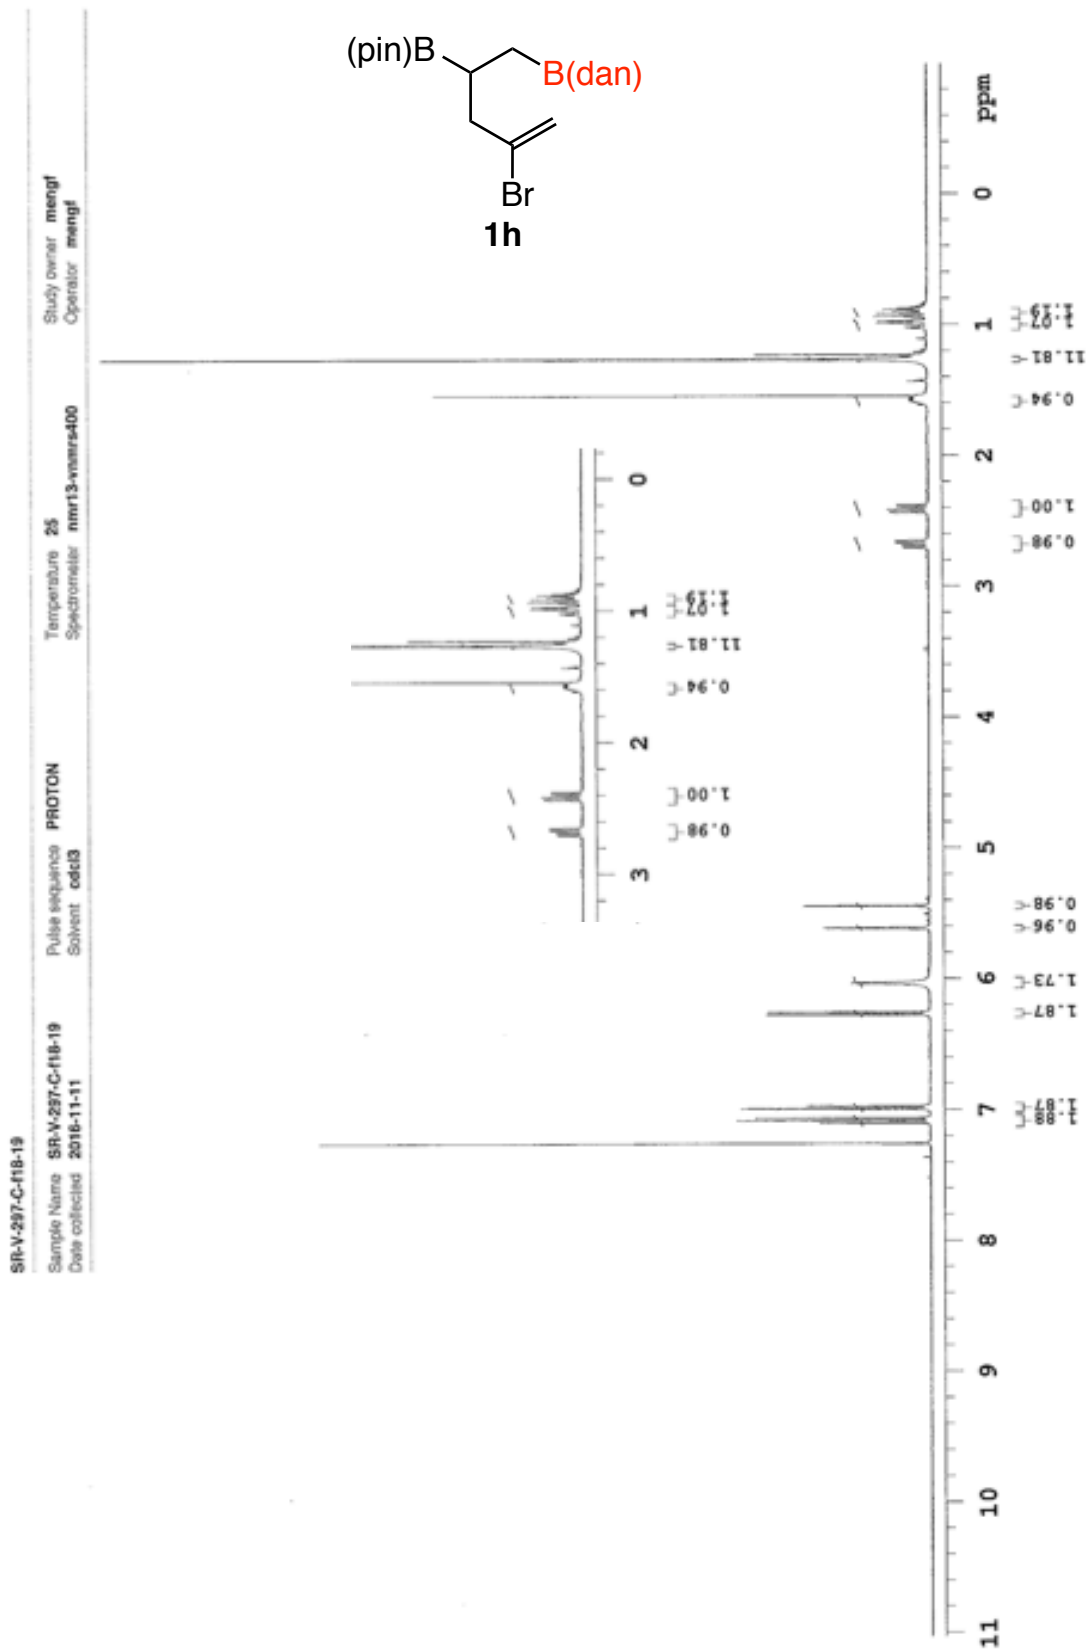

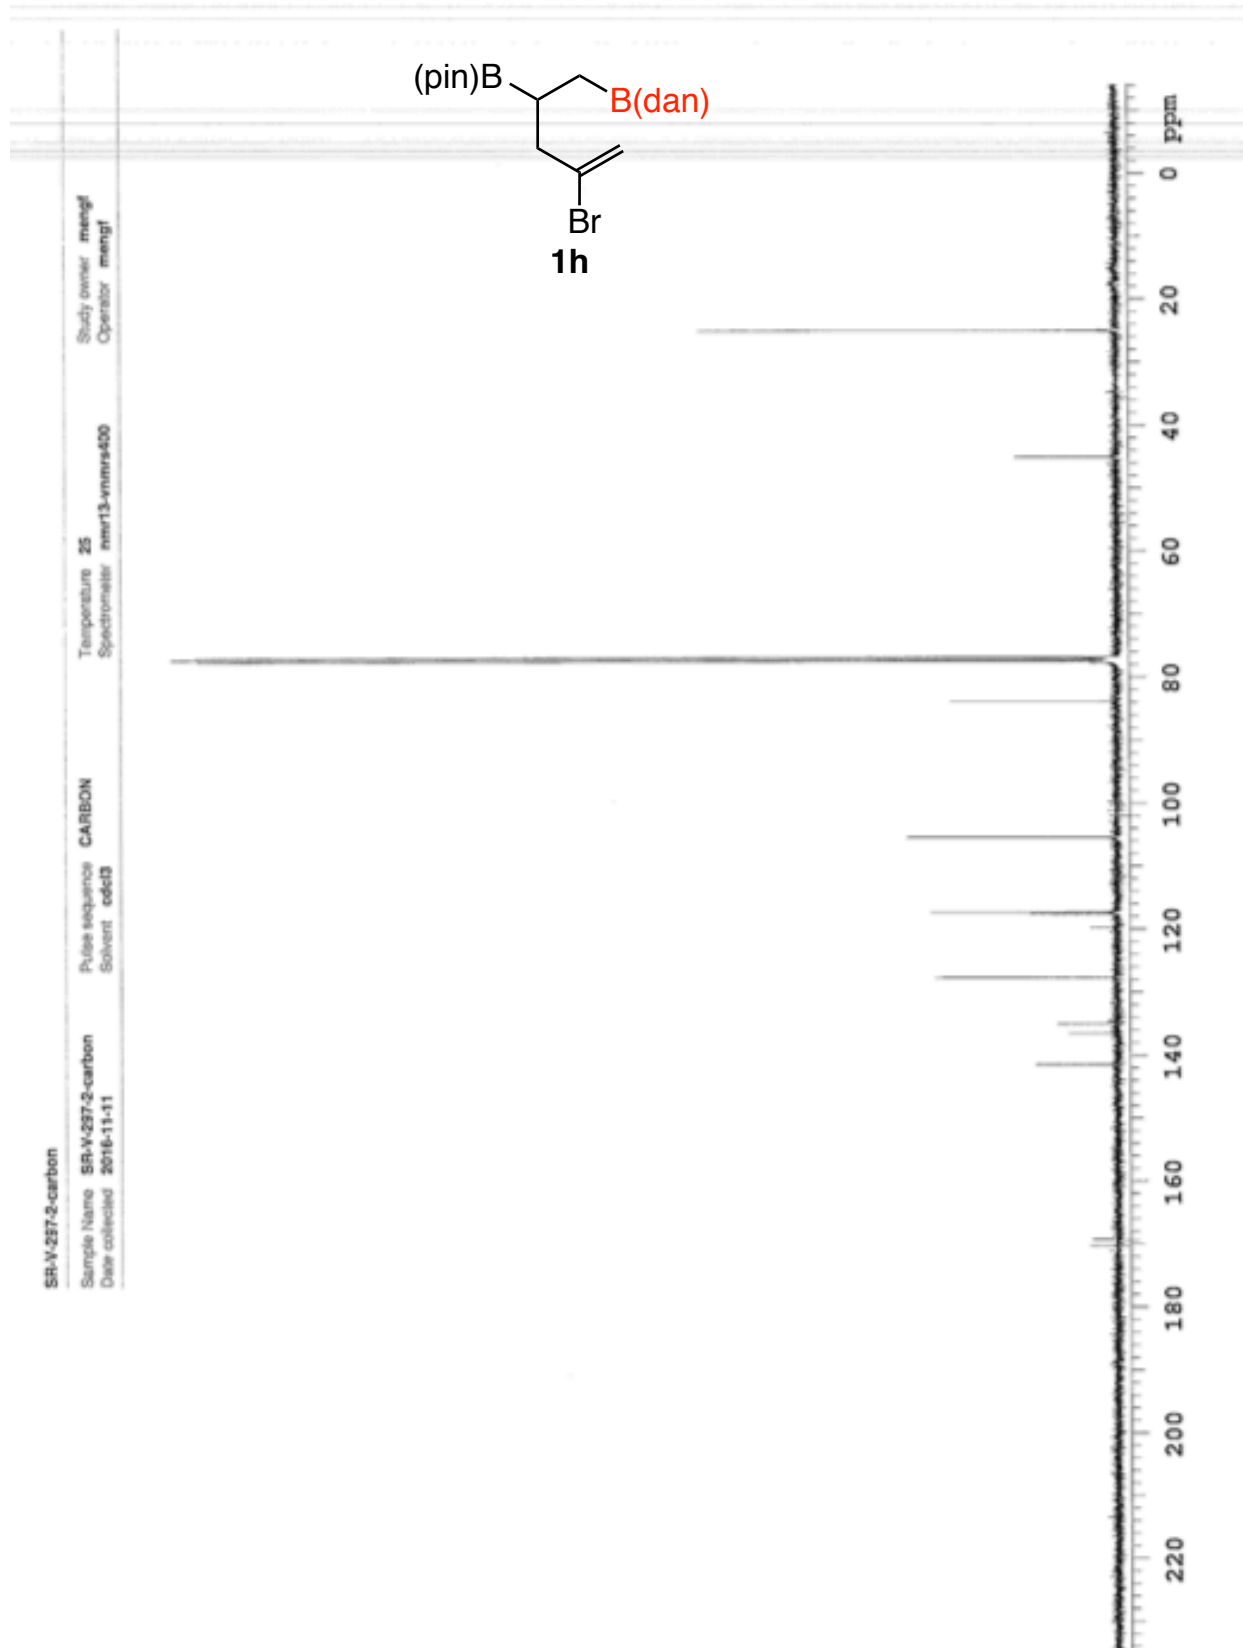

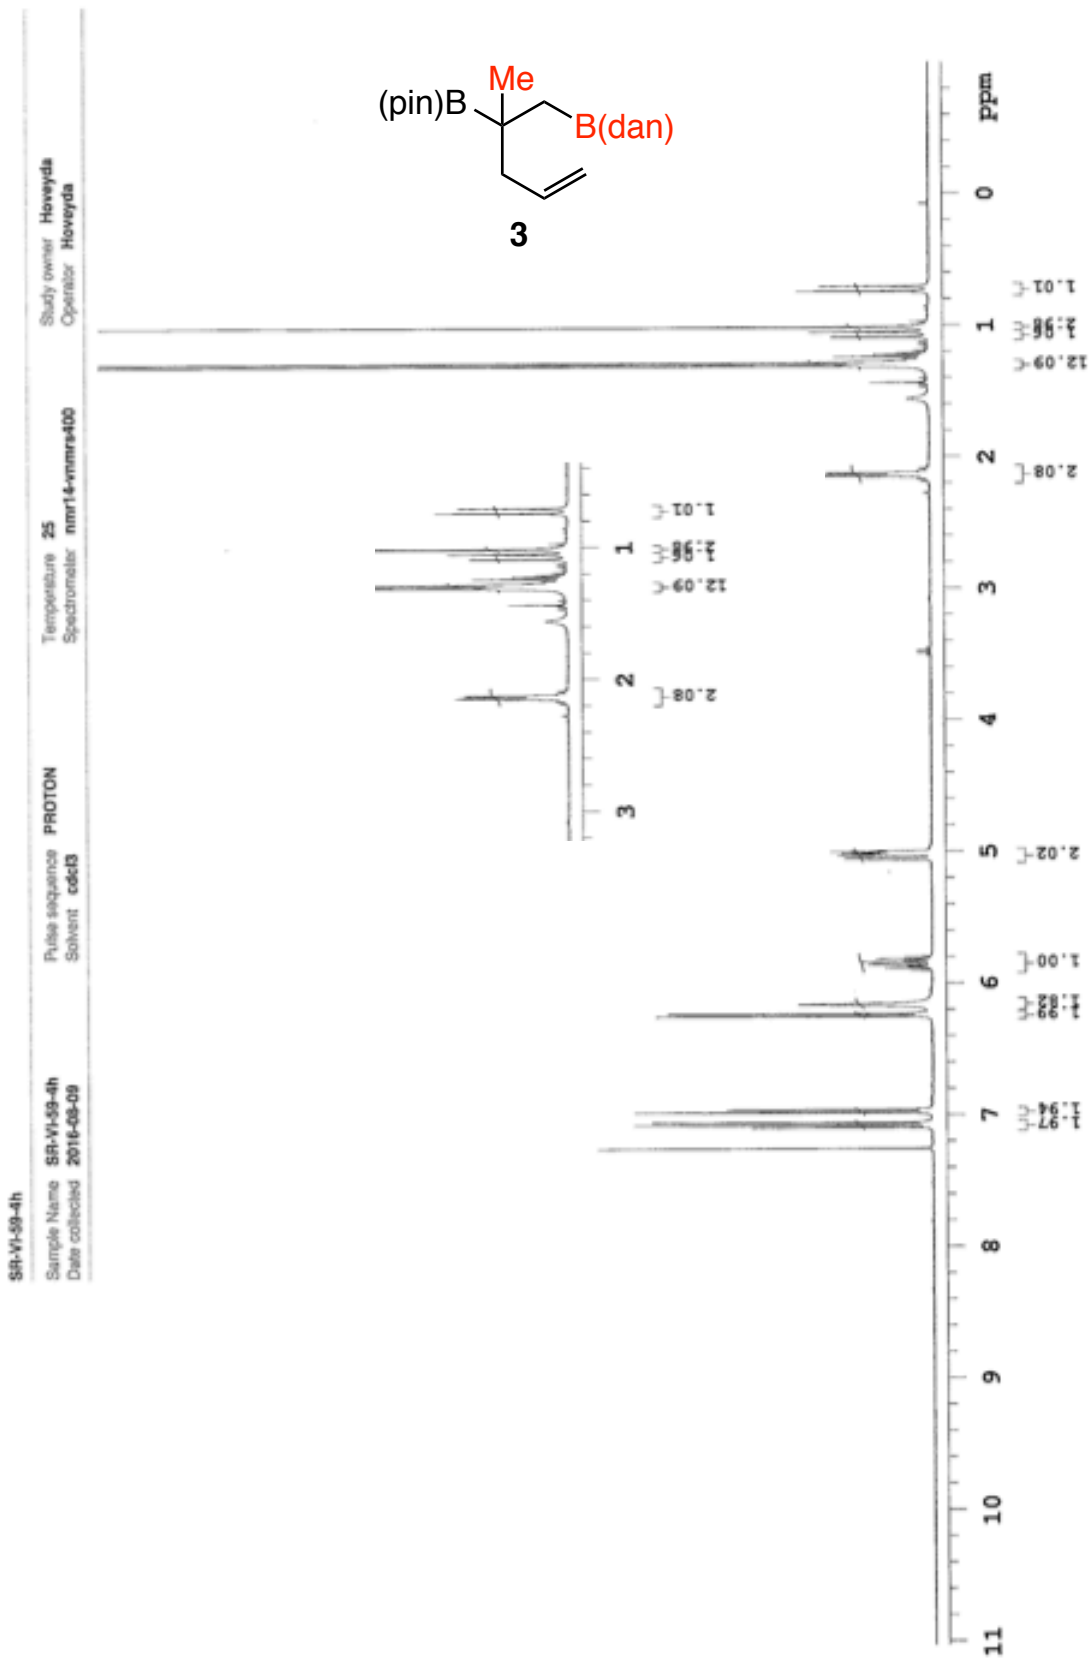

Sample Name 2016-08-09  
Date collected  
Pulse sequence CARBON  
Solvent cdcl3  
Temperature 25  
Spectrometer nmr13-vnmrs400  
Study owner mengf  
Operator mengf

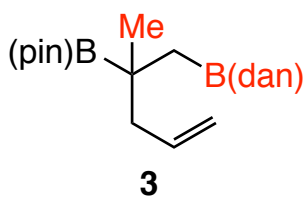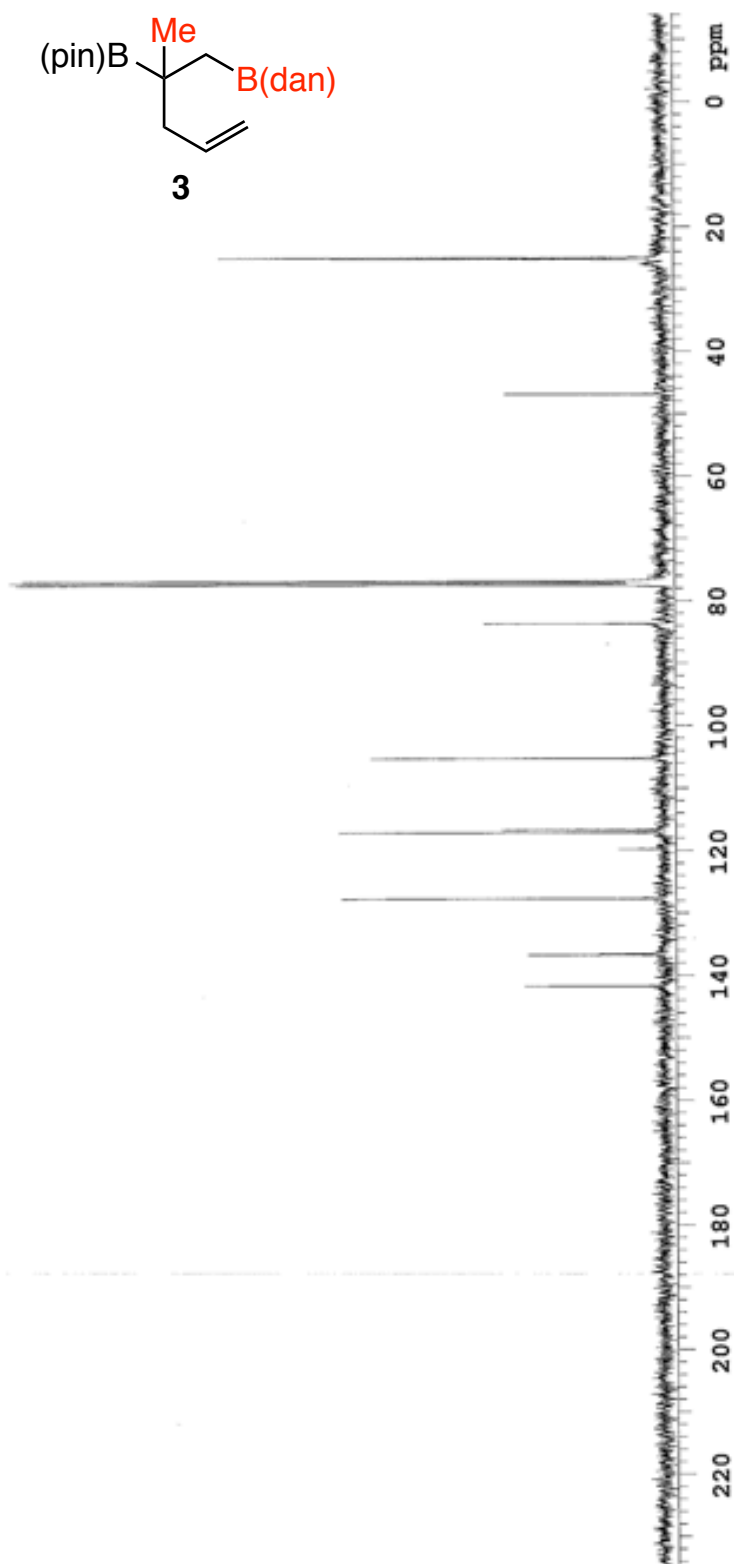

Sf-VI-146-A-prep  
 Sample Name Sf-VI-146-A-prep  
 Date collected 2017-01-24  
 Pulse sequence PROTON  
 Solvent cdcl3  
 Temperature 25  
 Spectrometer nmr14-vnmrs400  
 Study owner Hoveyda  
 Operator Hoveyda

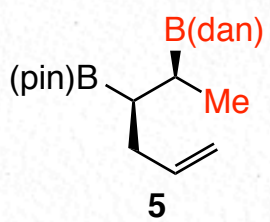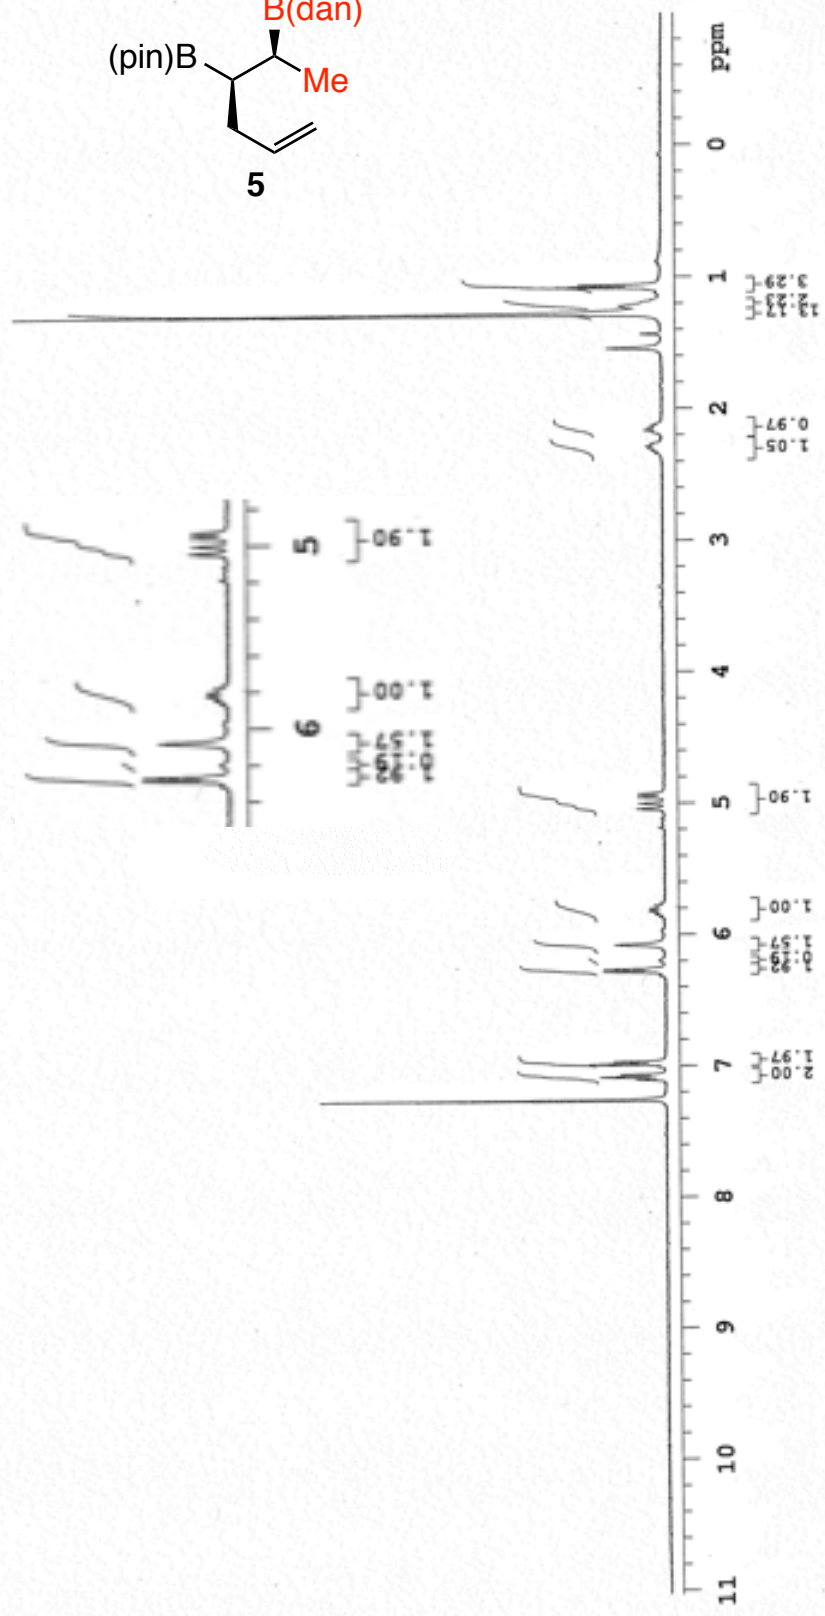

SR-VI-145-A-carbon

Sample Name SR-VI-145-A-carbon  
Date collected 2017-01-29

Pulse sequence CARBON  
Solvent cdcl3

Temperature 25  
Spectrometer nmr13-years-400

Study owner mingf  
Operator mingf

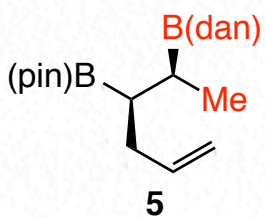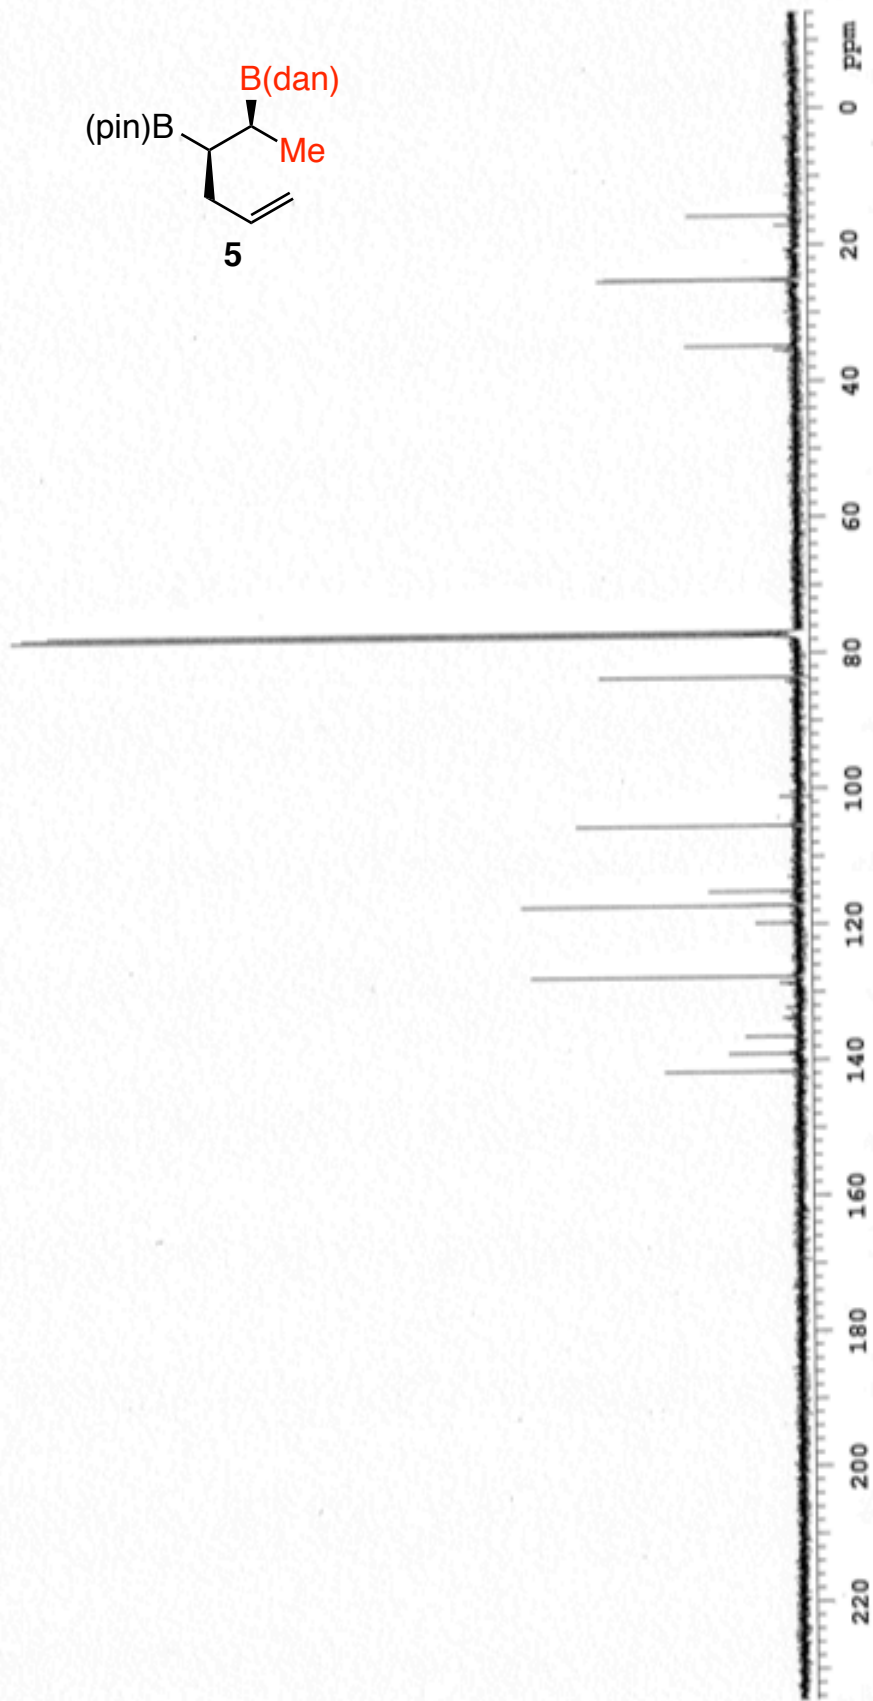

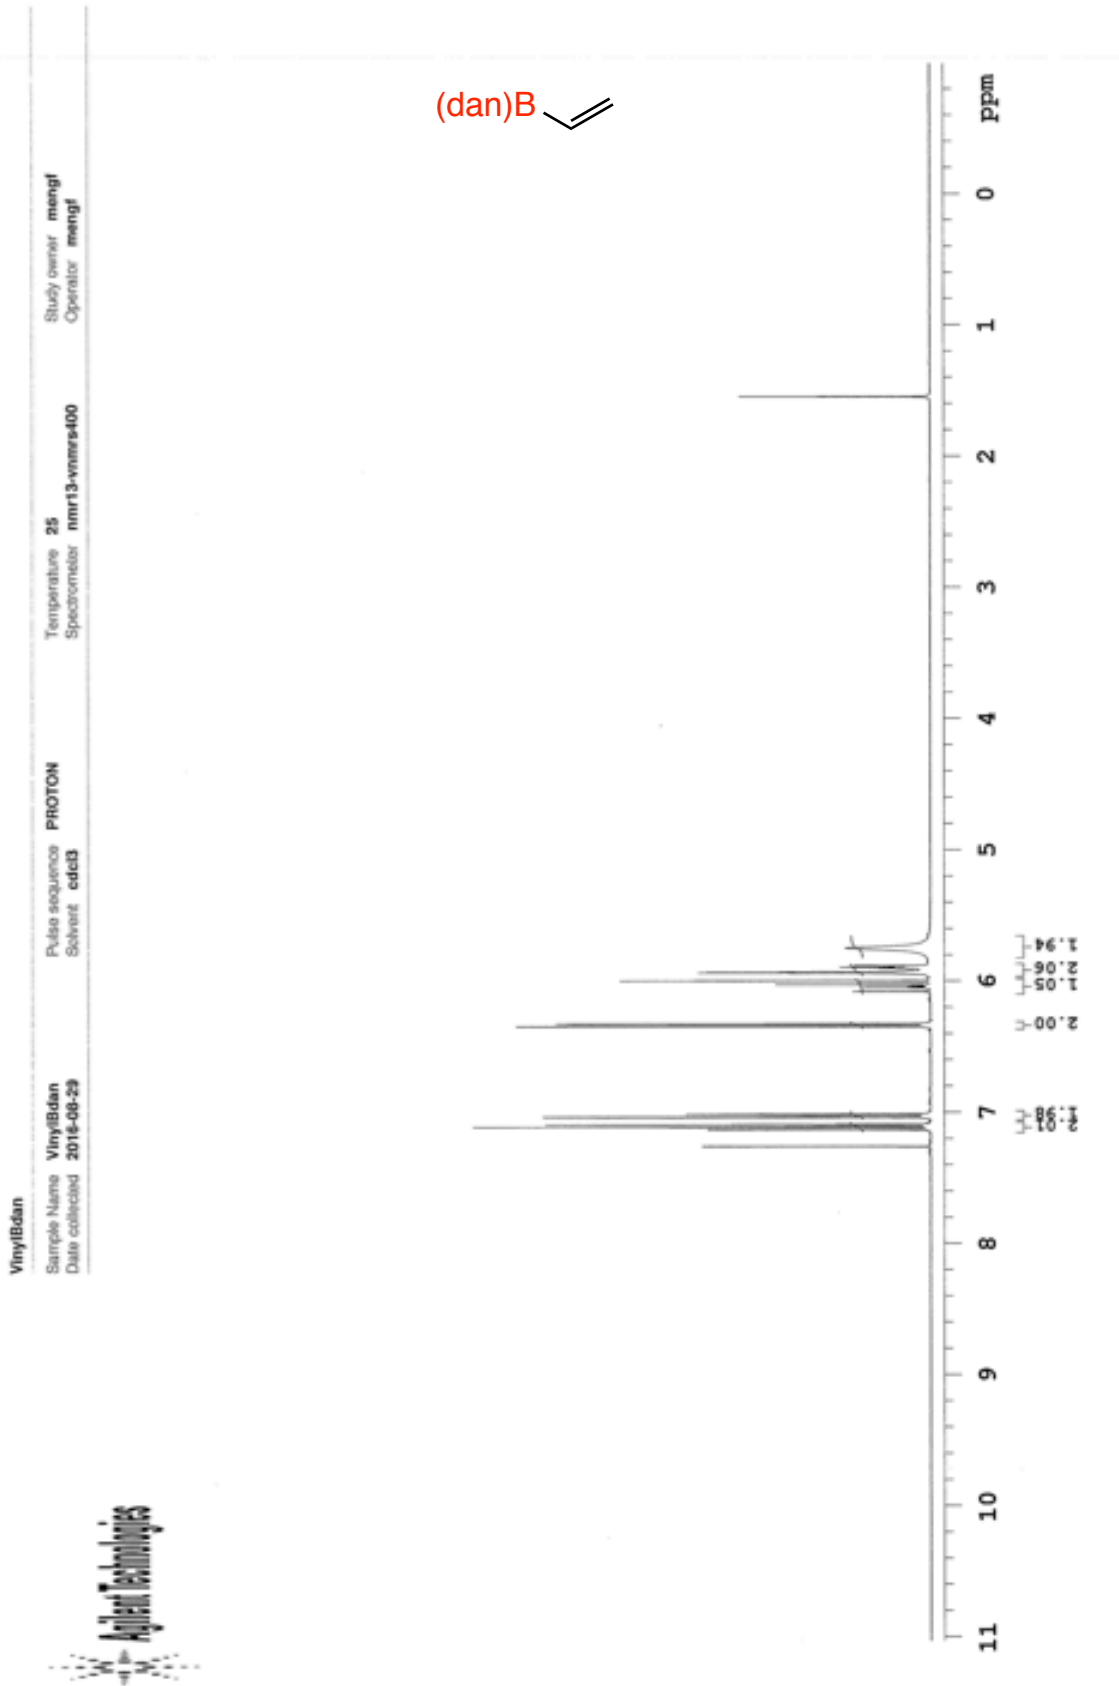

VinyIB\_dan\_-carbon

Sample Name VinyIB\_dan\_-carbon  
Date collected 2016-08-29

Pulse sequence CARBON  
Solvent cdcl3

Temperature 25  
Spectrometer nmr13-vnmrs400

Study owner mengf  
Operator mengf

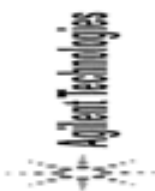

(dan)B C=CC

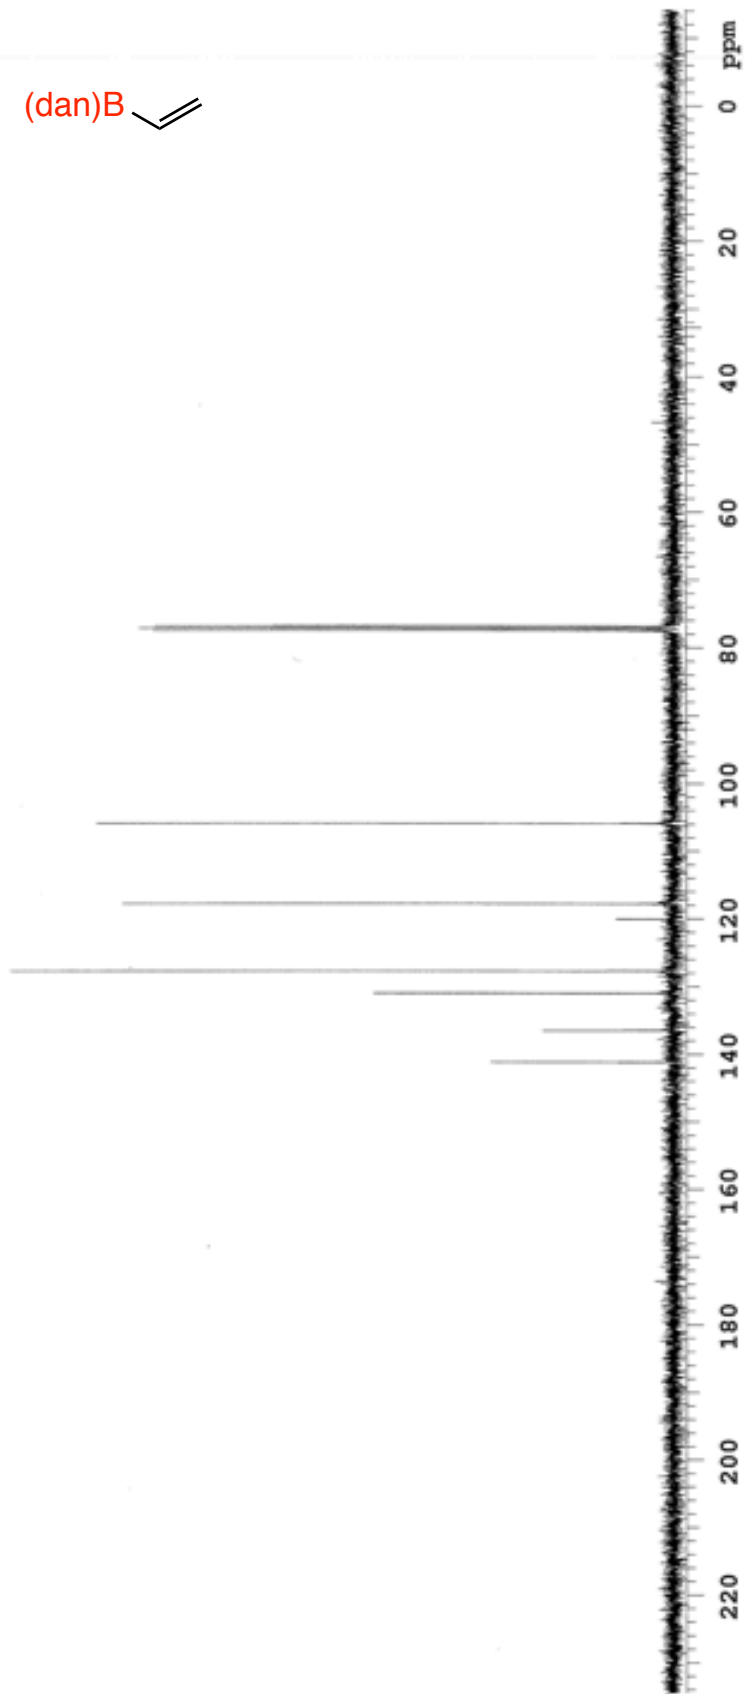



SIR-VI-88-A

Sample Name  
Date collected

Pulse sequence  
Solvent

PROTON

Temperature  
Spectrometer

nmr13-vnmr-400

Study center  
Operator

mangf  
mengf

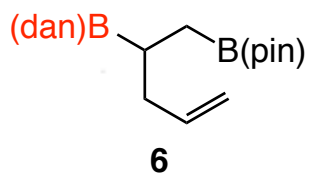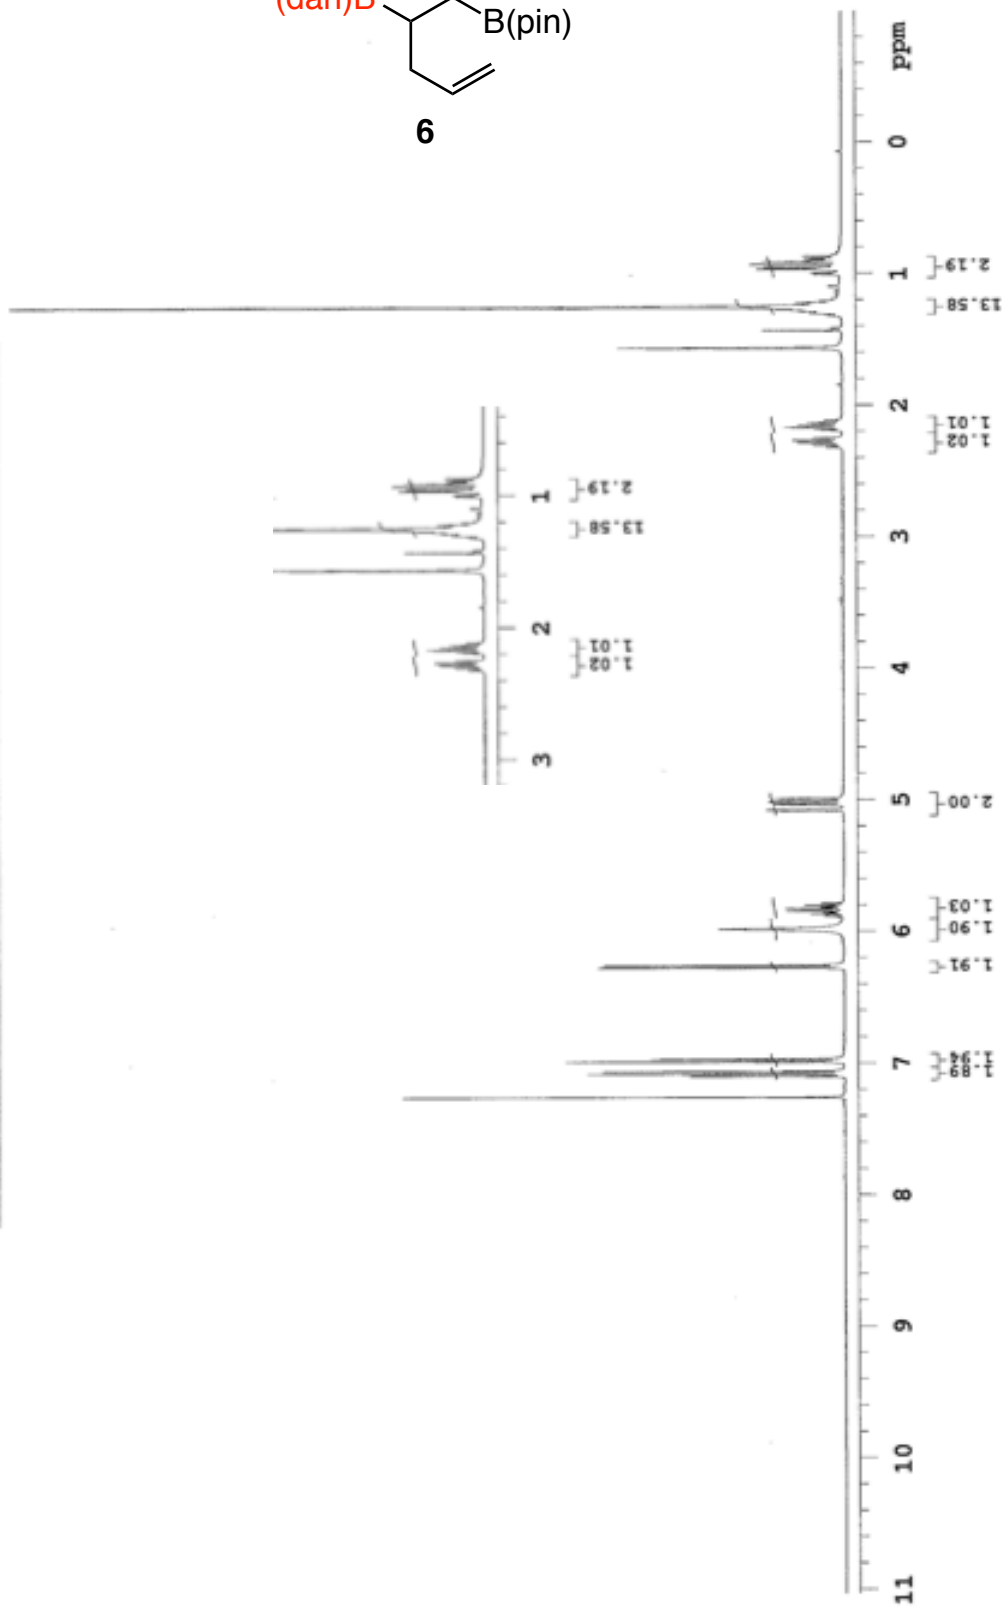

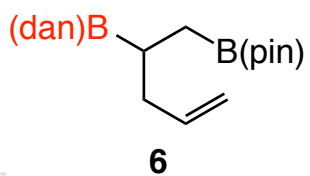

Sample Name: SA-V-164-carbon  
Data Collected on: vnr13-vnr1498  
Archive directory:  
Sample directory:  
Fidfile: CARBON  
Pulse Sequence: CARBON (szpu1)  
Solvent: cdcl3  
Data collected on: Aug 12 2015

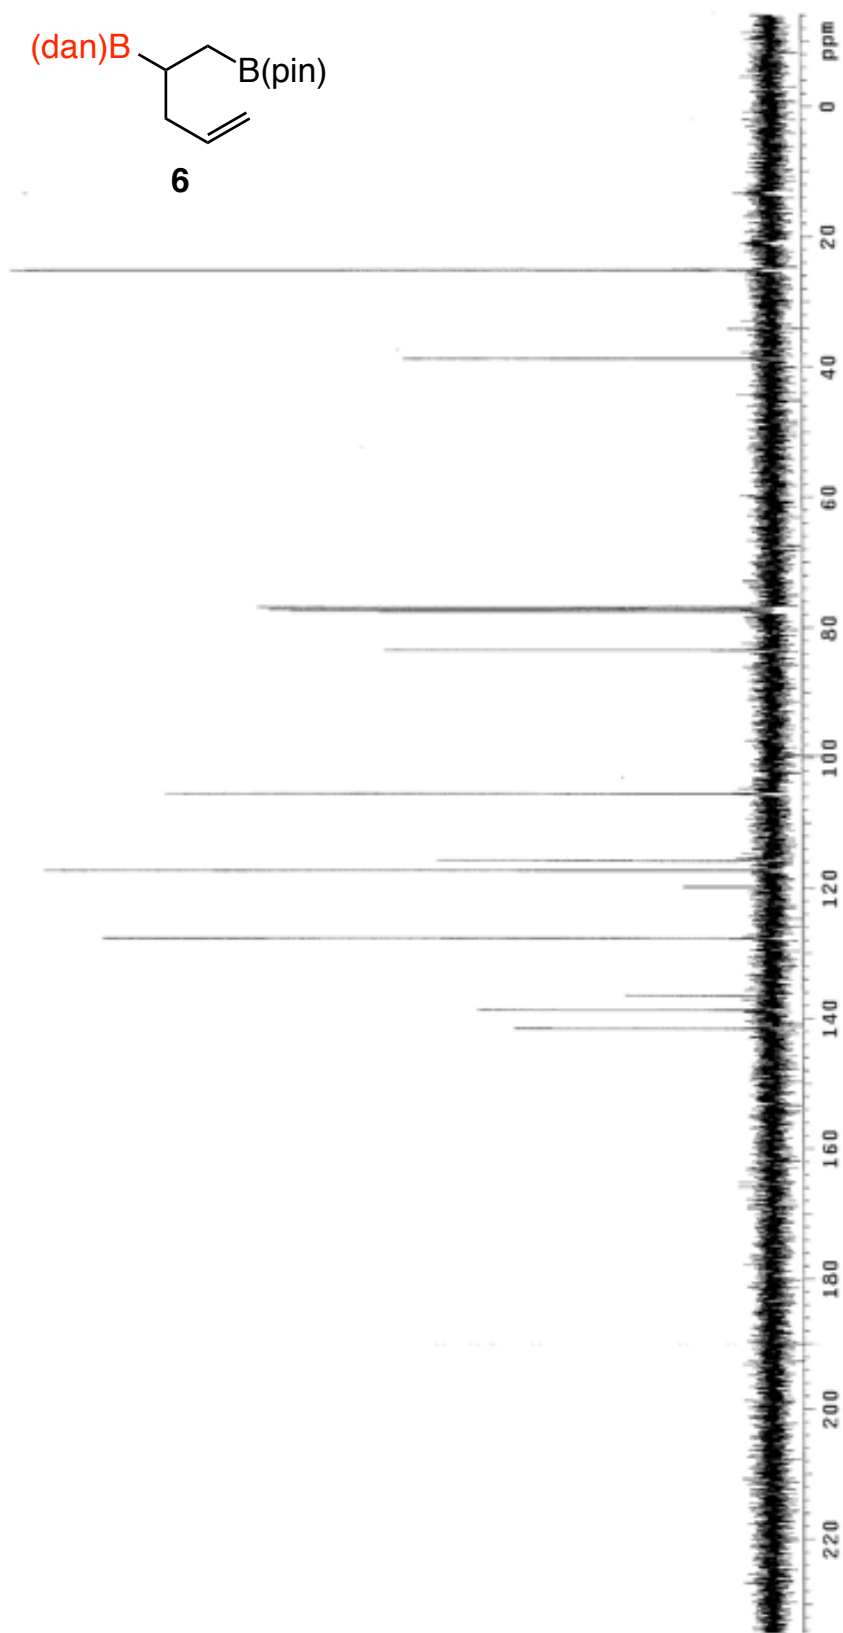

SR-V-297-oxid-buffer  
Sample Name SR-V-297-oxid-buffer  
Date collected 2016-05-13  
Pulse sequence PROTON  
Solvent cdcl3  
Temperature 25  
Spectrometer nmr13-vnmrs400  
Study owner mengi  
Operator mengi

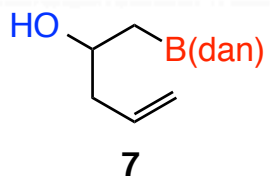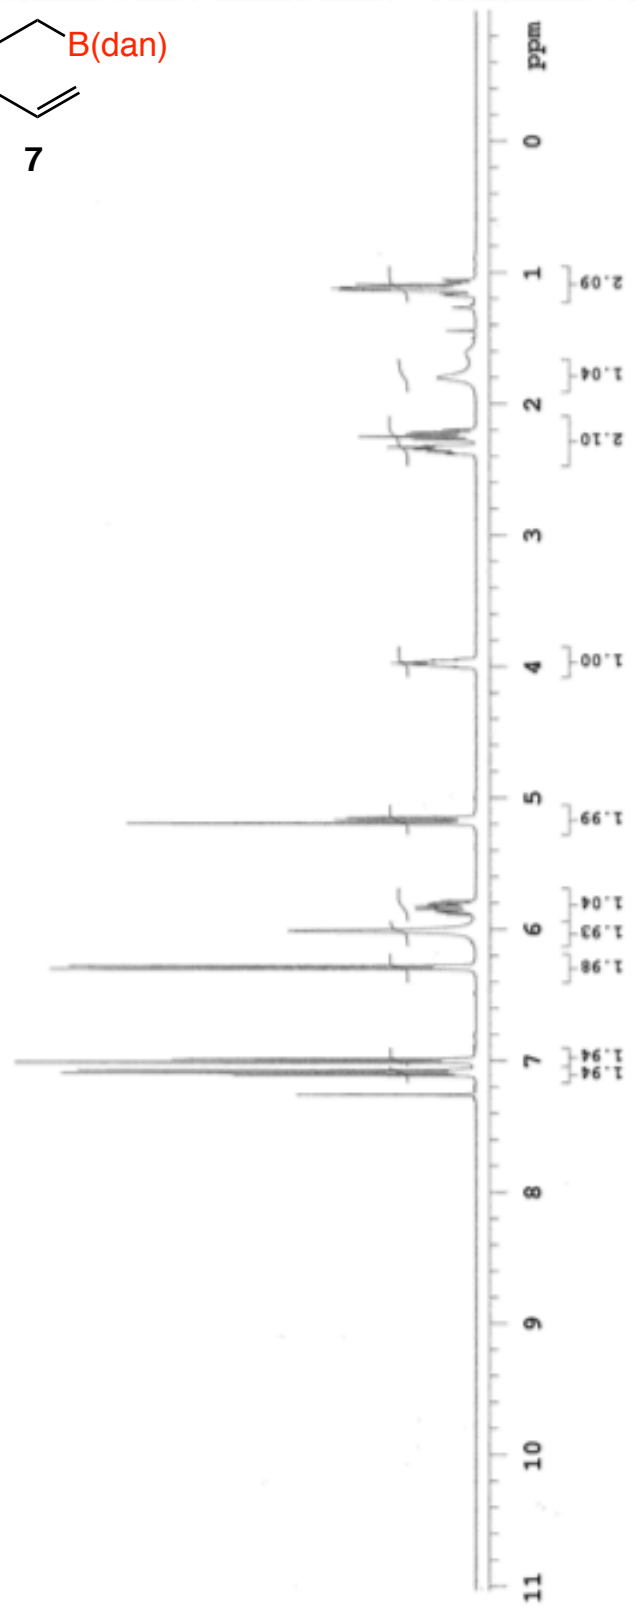

SR-V-297-oxid-buffer-carbon

Sample Name SR-V-297-oxid-buffer-carbon  
Date collected 2016-05-13

SEQUENCE CARBON  
SOLVENT cdcl3

Temperature 25  
Spectrometer nmr13-vnmr-400

Study owner mengf  
Operator mengf

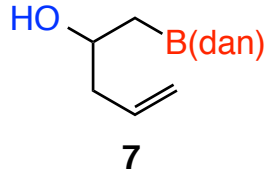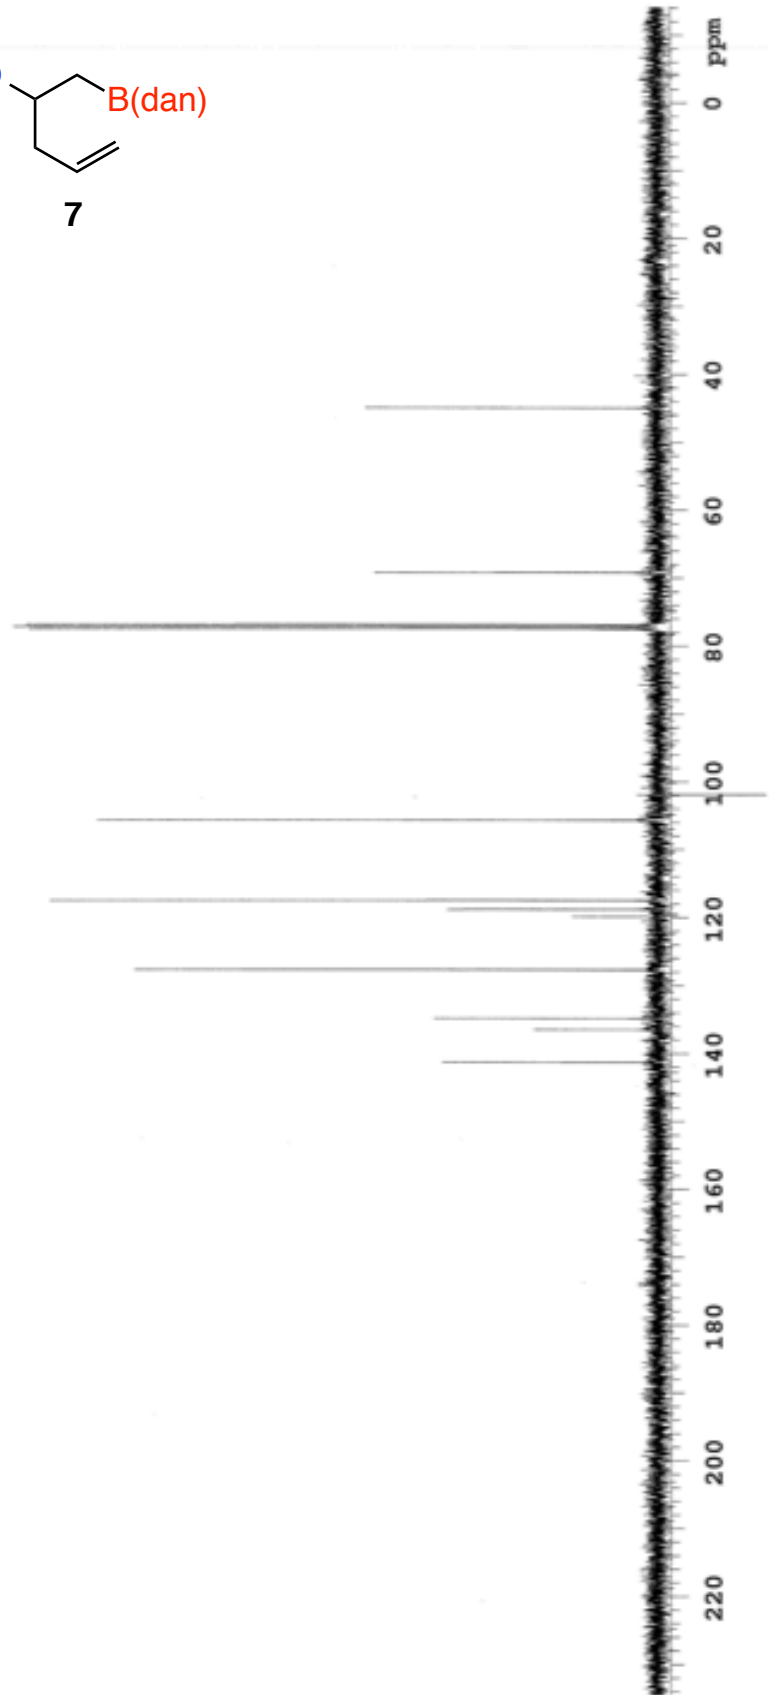

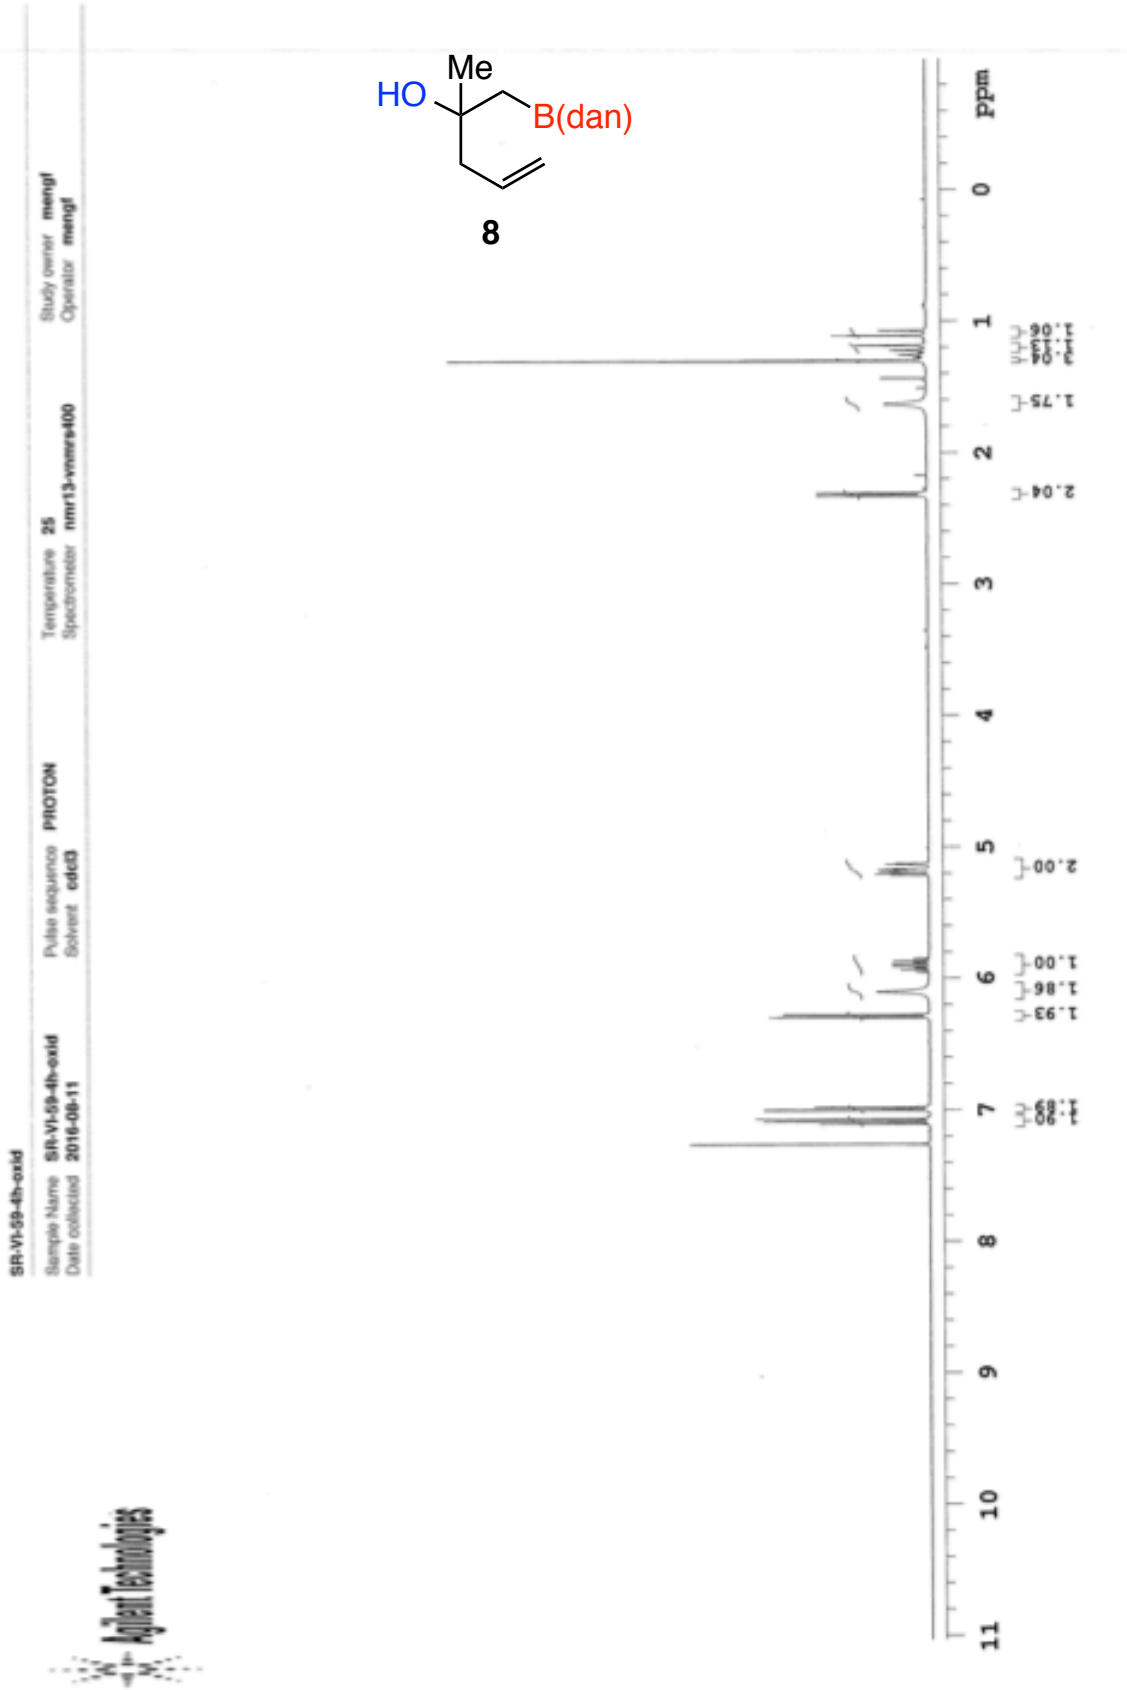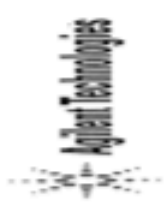

SR-VI-59-4h-oxid-carbon

Sample Name SR-VI-59-4h-oxid-carbon  
Date collected 2016-08-13

Pulse sequence CARBON  
Solvent cdcl3

Temperature 25  
Spectrometer nmr13-vnmr400

Study owner mengf  
Operator mengf

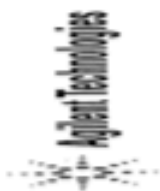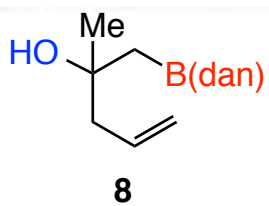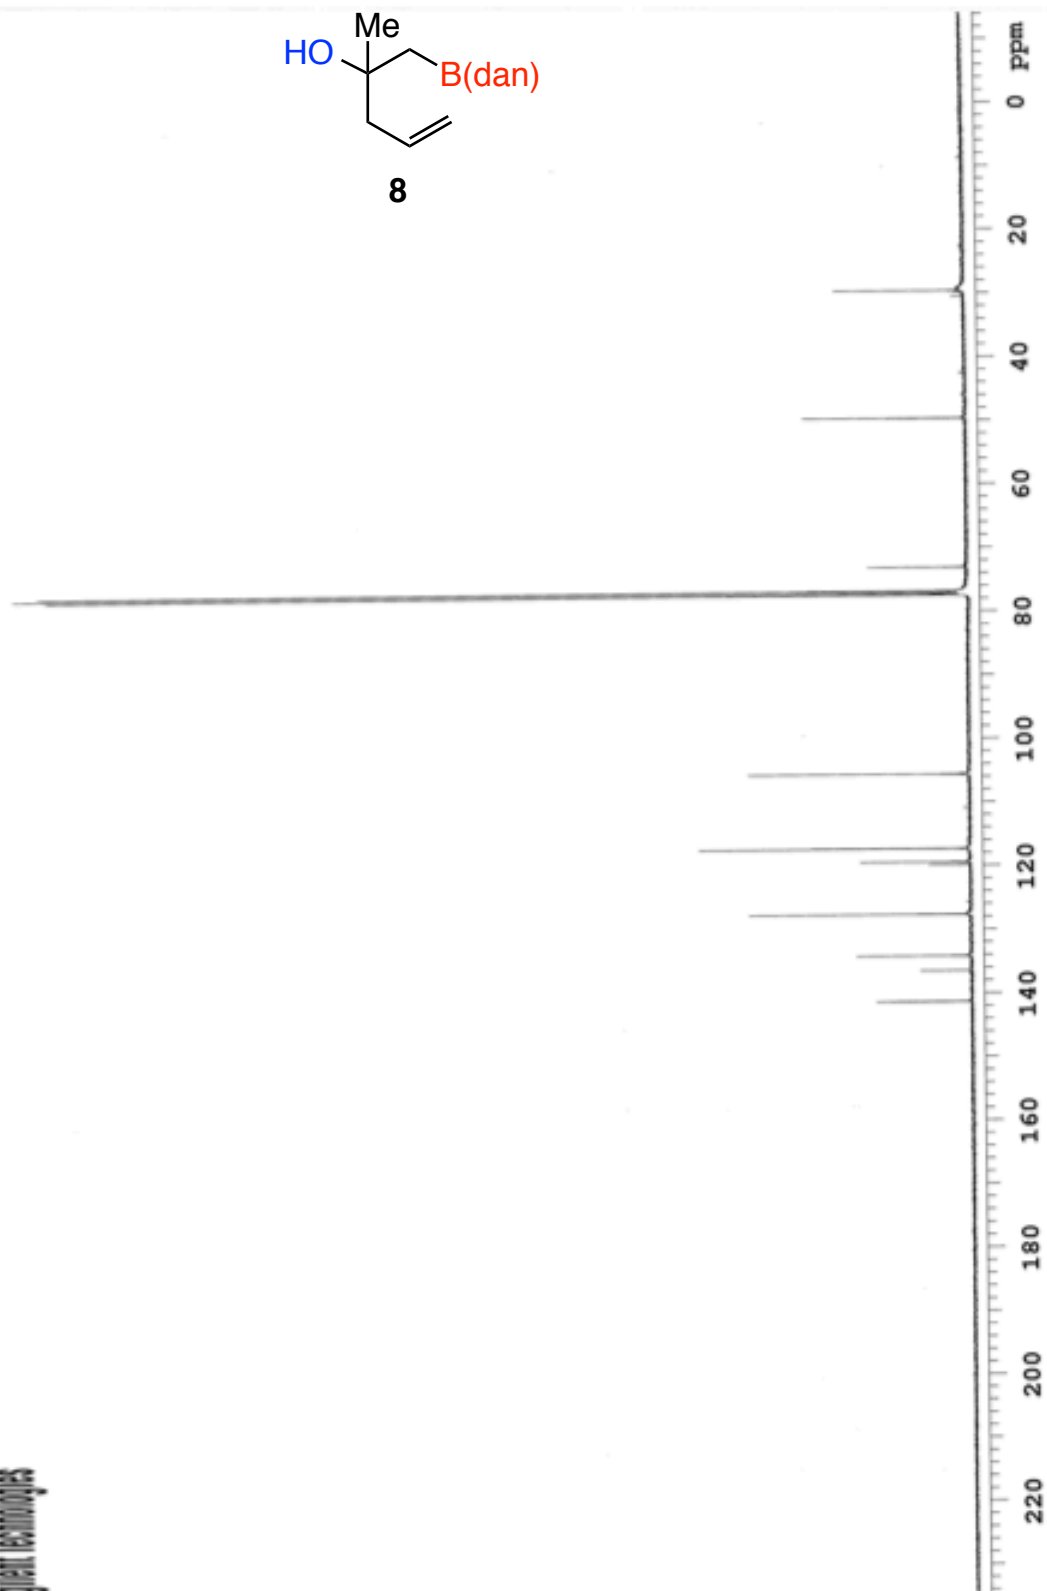

SIR-VI-123-OTBS

Sample Name SIR-VI-123-OTBS  
Date collected 2016-11-06

Pulse sequence PROTON  
Solvent cdcl3

Temperature 25  
Spectrometer nmr13-vnmr-400

Study center mengf  
Operator mengf

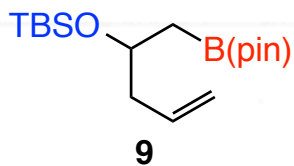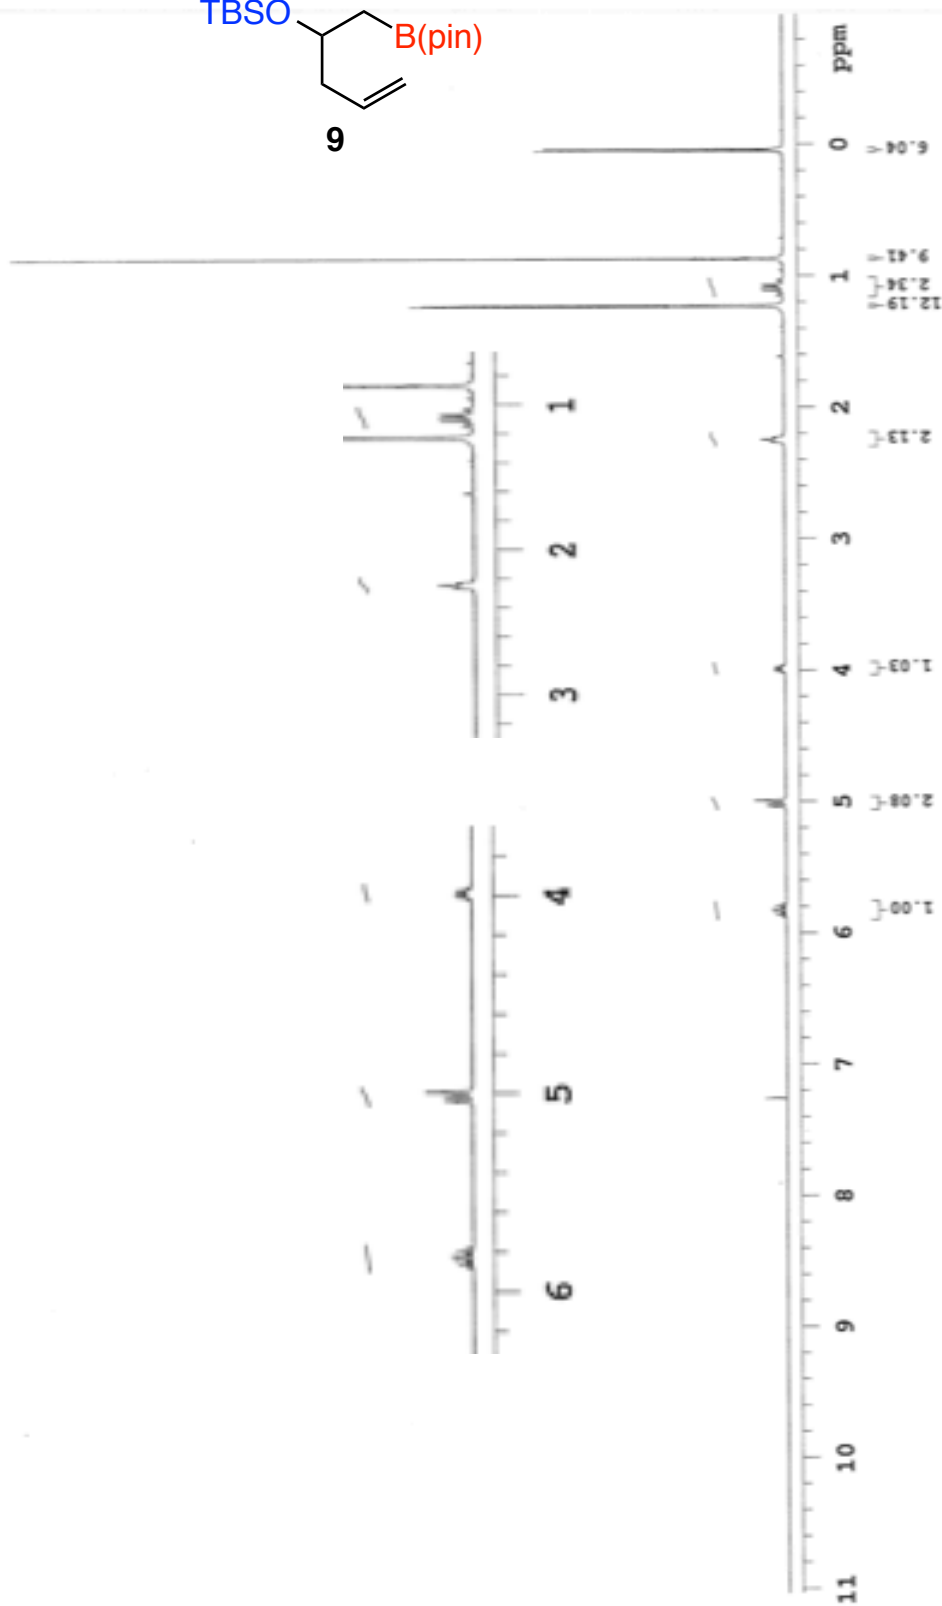







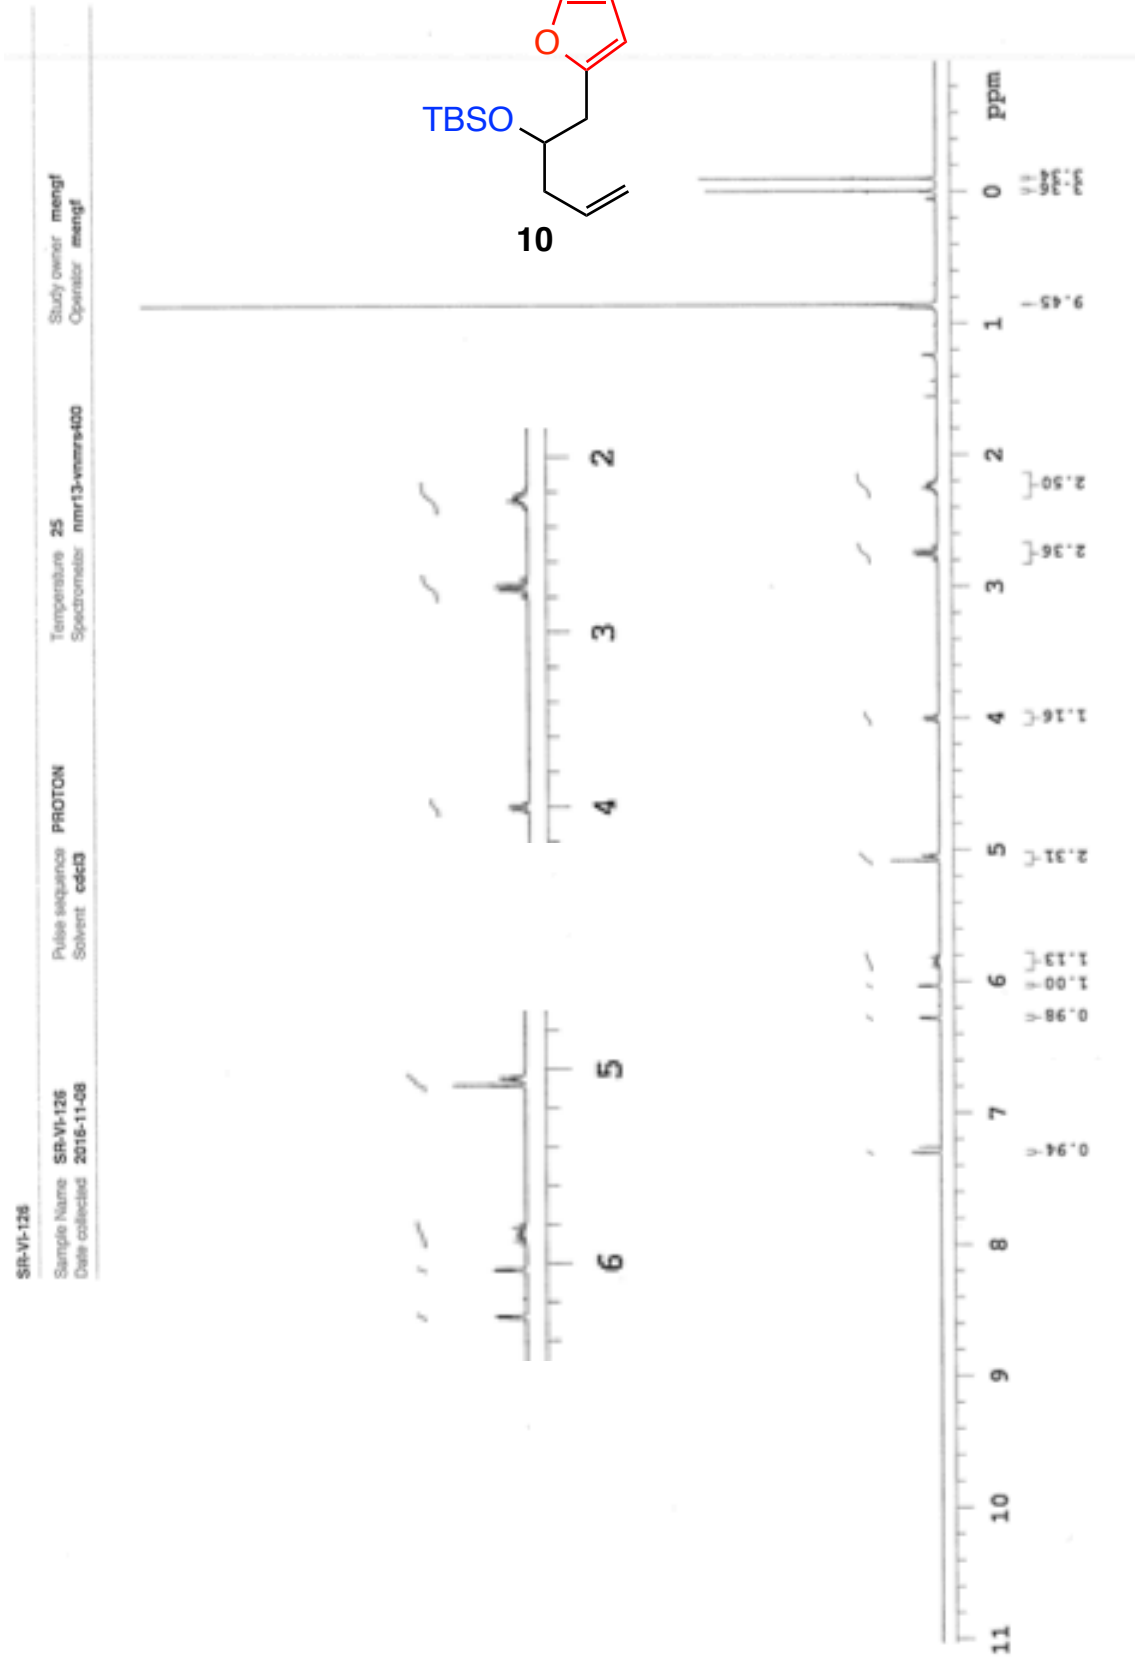

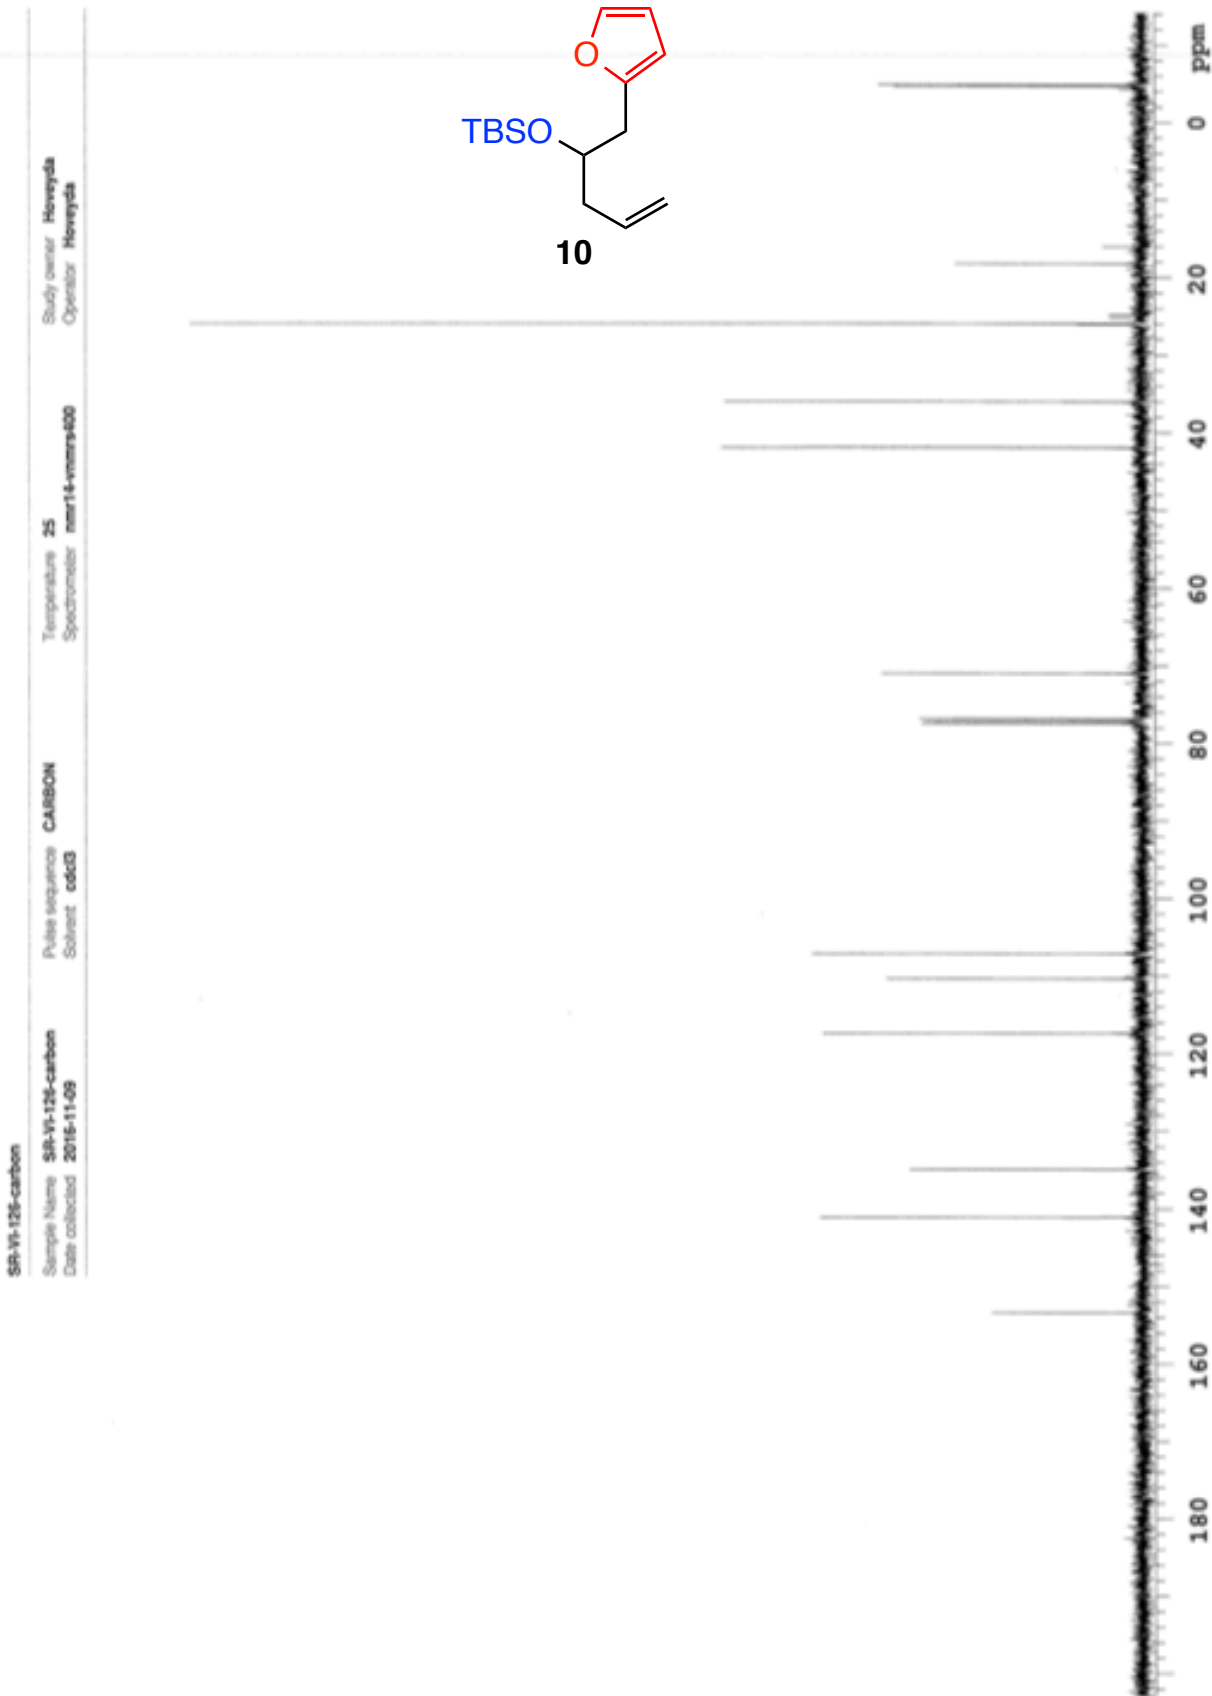

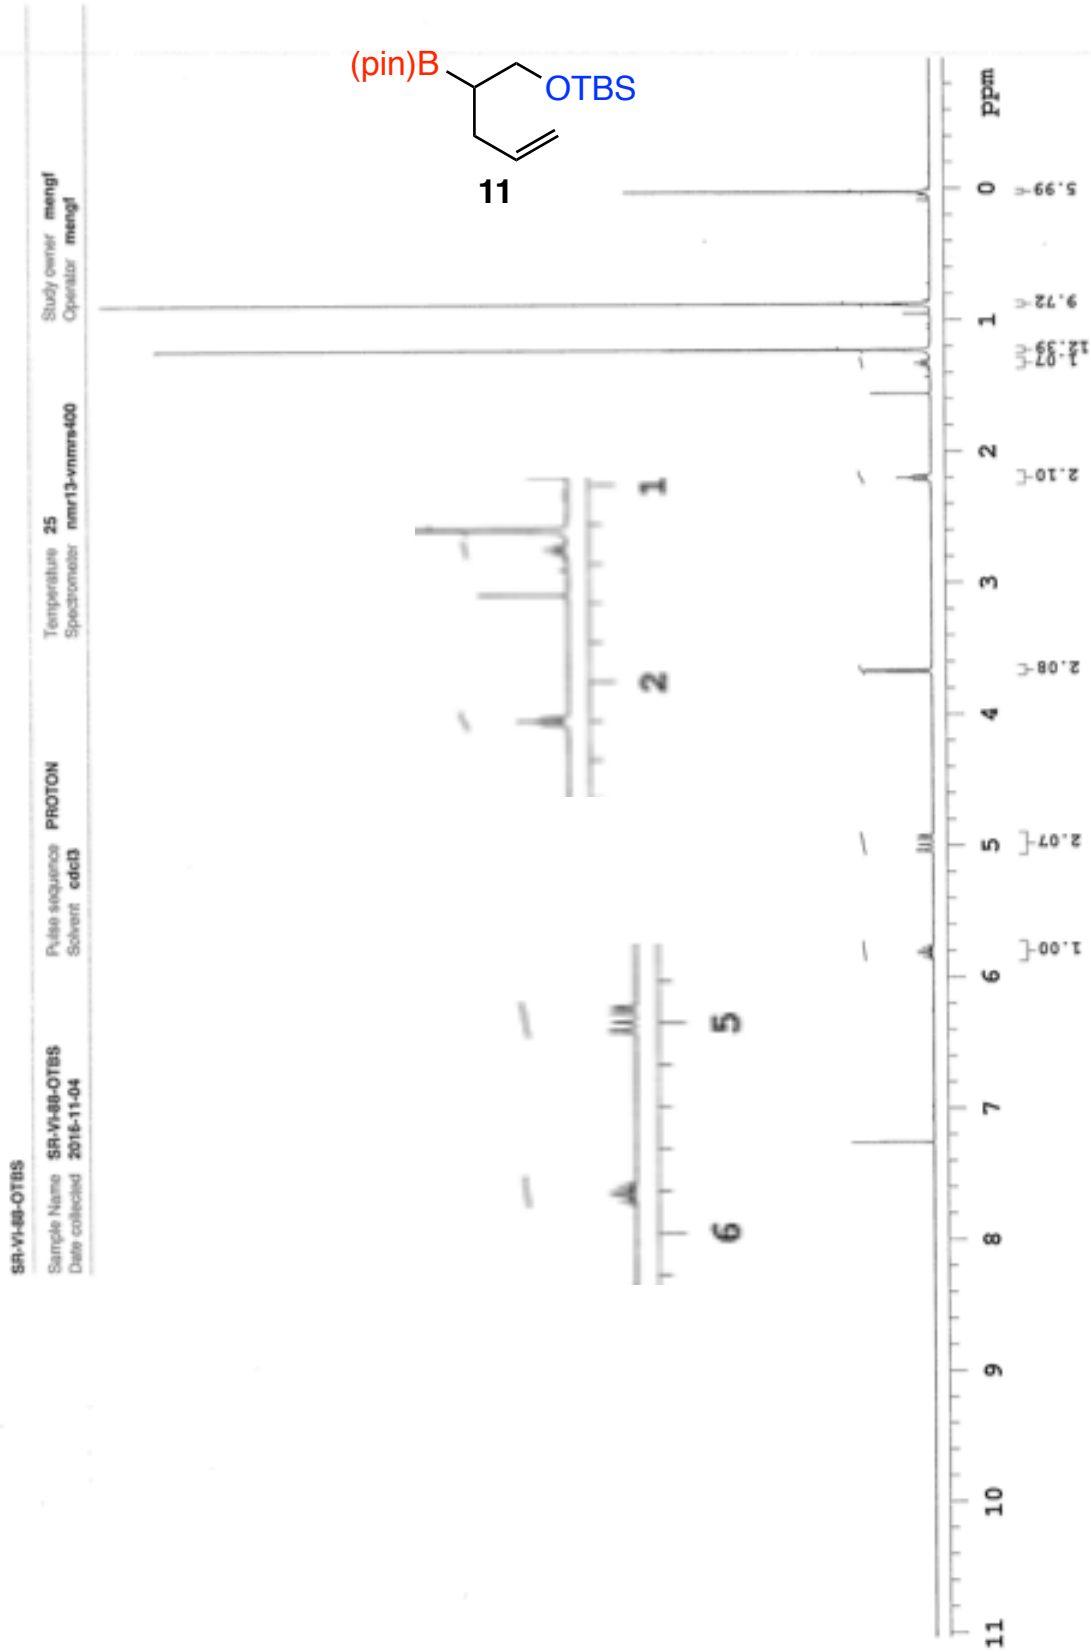

SR-Y148-OTBS-carbon

|                |                     |                |        |              |               |             |       |
|----------------|---------------------|----------------|--------|--------------|---------------|-------------|-------|
| Sample Name    | SR-Y148-OTBS-carbon | Pulse sequence | CARBON | Temperature  | 25            | Study owner | manoj |
| Date collected | 2016-11-04          | Solvent        | cdcl3  | Spectrometer | nmr13-vnmr400 | Operator    | manoj |

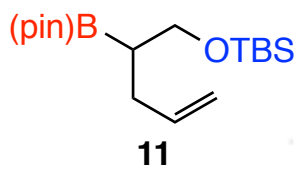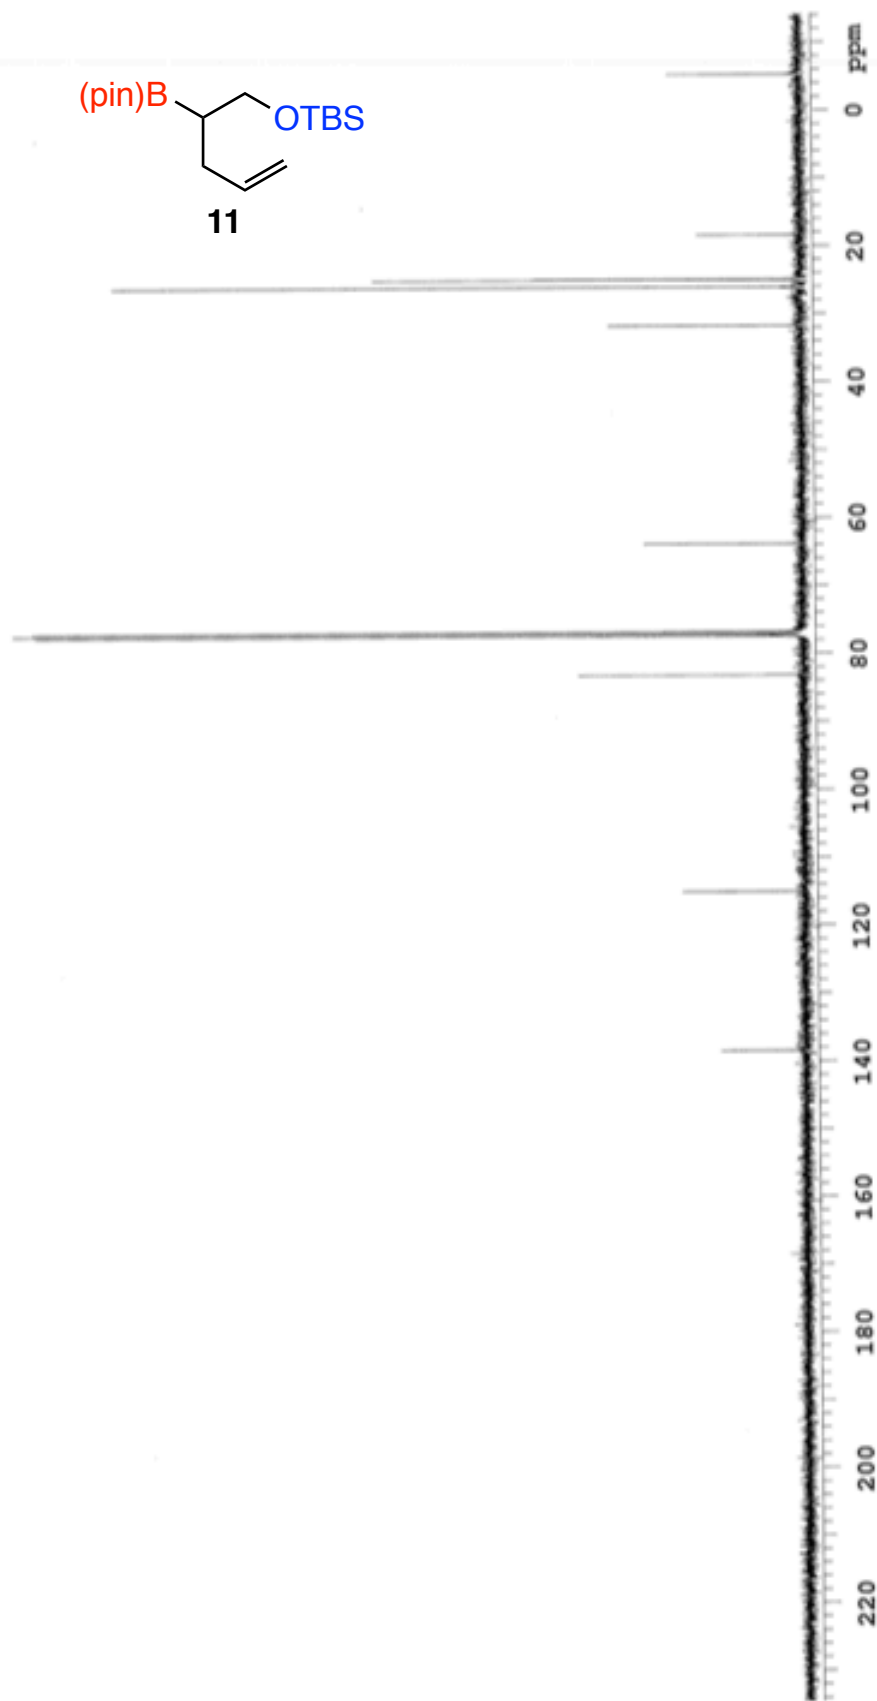



SIR-VI-124-carbon

|                |                   |                |              |                |             |       |
|----------------|-------------------|----------------|--------------|----------------|-------------|-------|
| Sample Name    | SIR-VI-124-carbon | CARBON         | Temperature  | 25             | Study owner | mengf |
| Date collected | 2016-11-05        | Pulse sequence | Spectrometer | nmr13-mmra-400 | Operator    | mengf |
|                |                   | Solvent        |              |                |             |       |
|                |                   |                |              |                |             |       |
|                |                   |                |              |                |             |       |

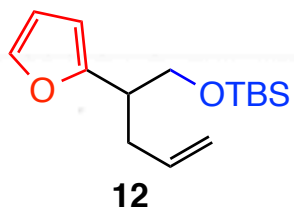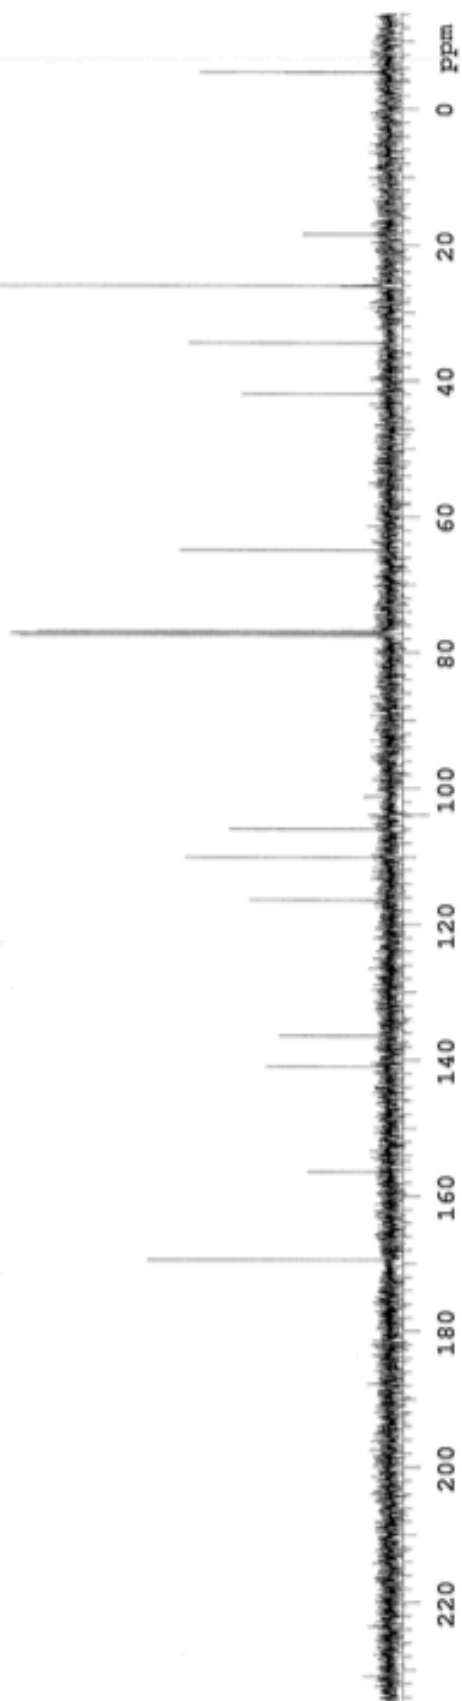

SIR-VI-127

Sample Name: SR-VI-127  
Date collected: 2016-11-11

Pulse sequence: PROTON  
Solvent: cdcl3

Temperature: 25  
Spectrometer: nmr13-vnmrs400

Study owner: mengf  
Operator: mengf

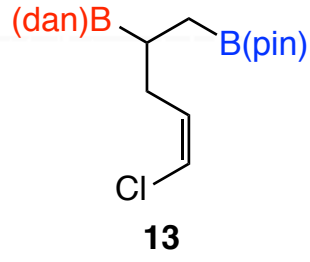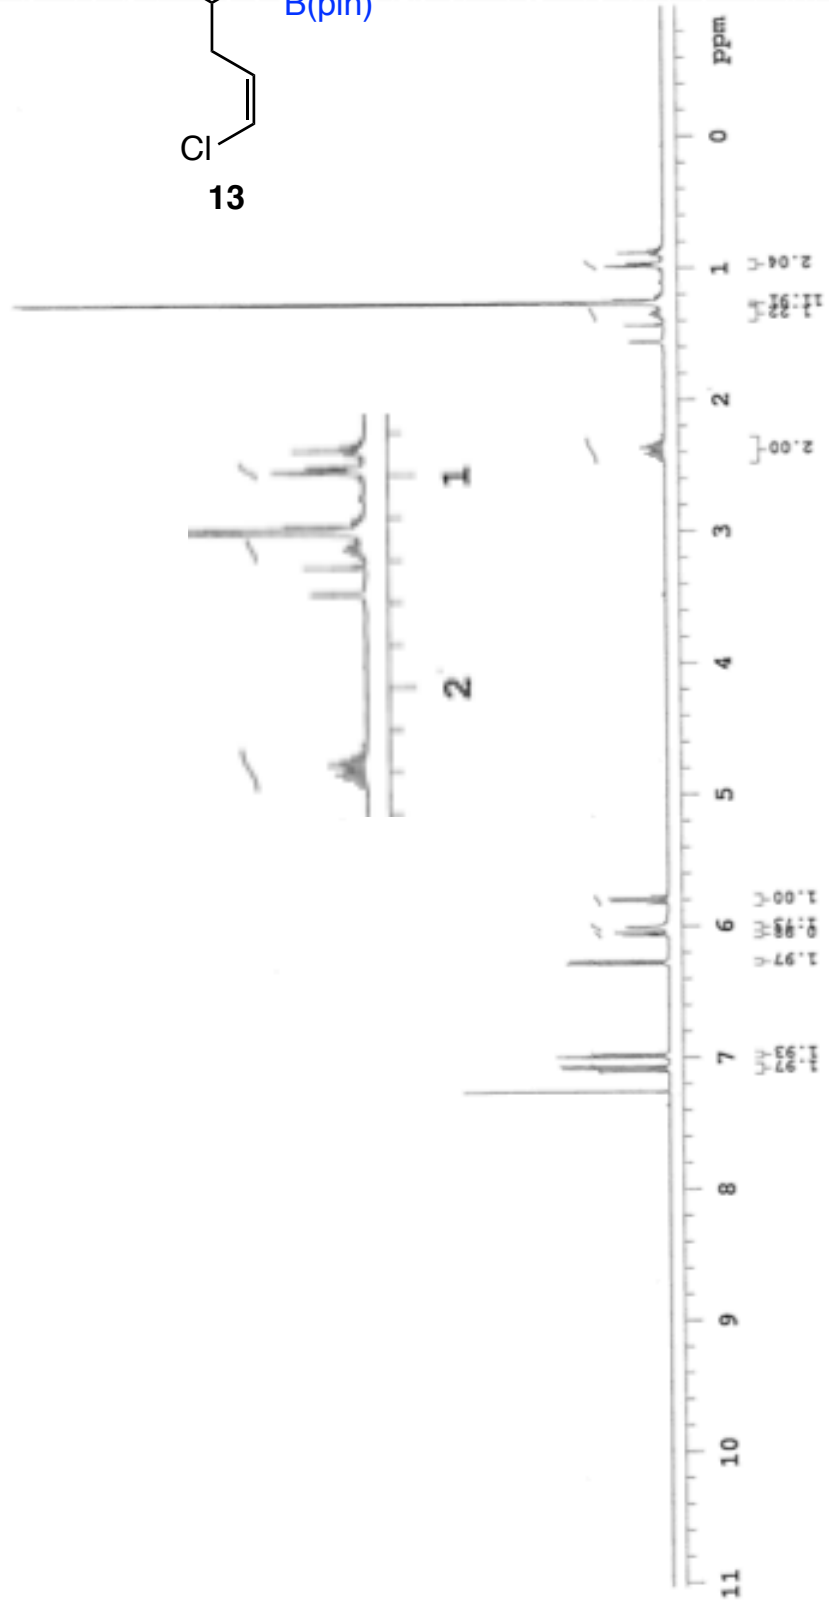



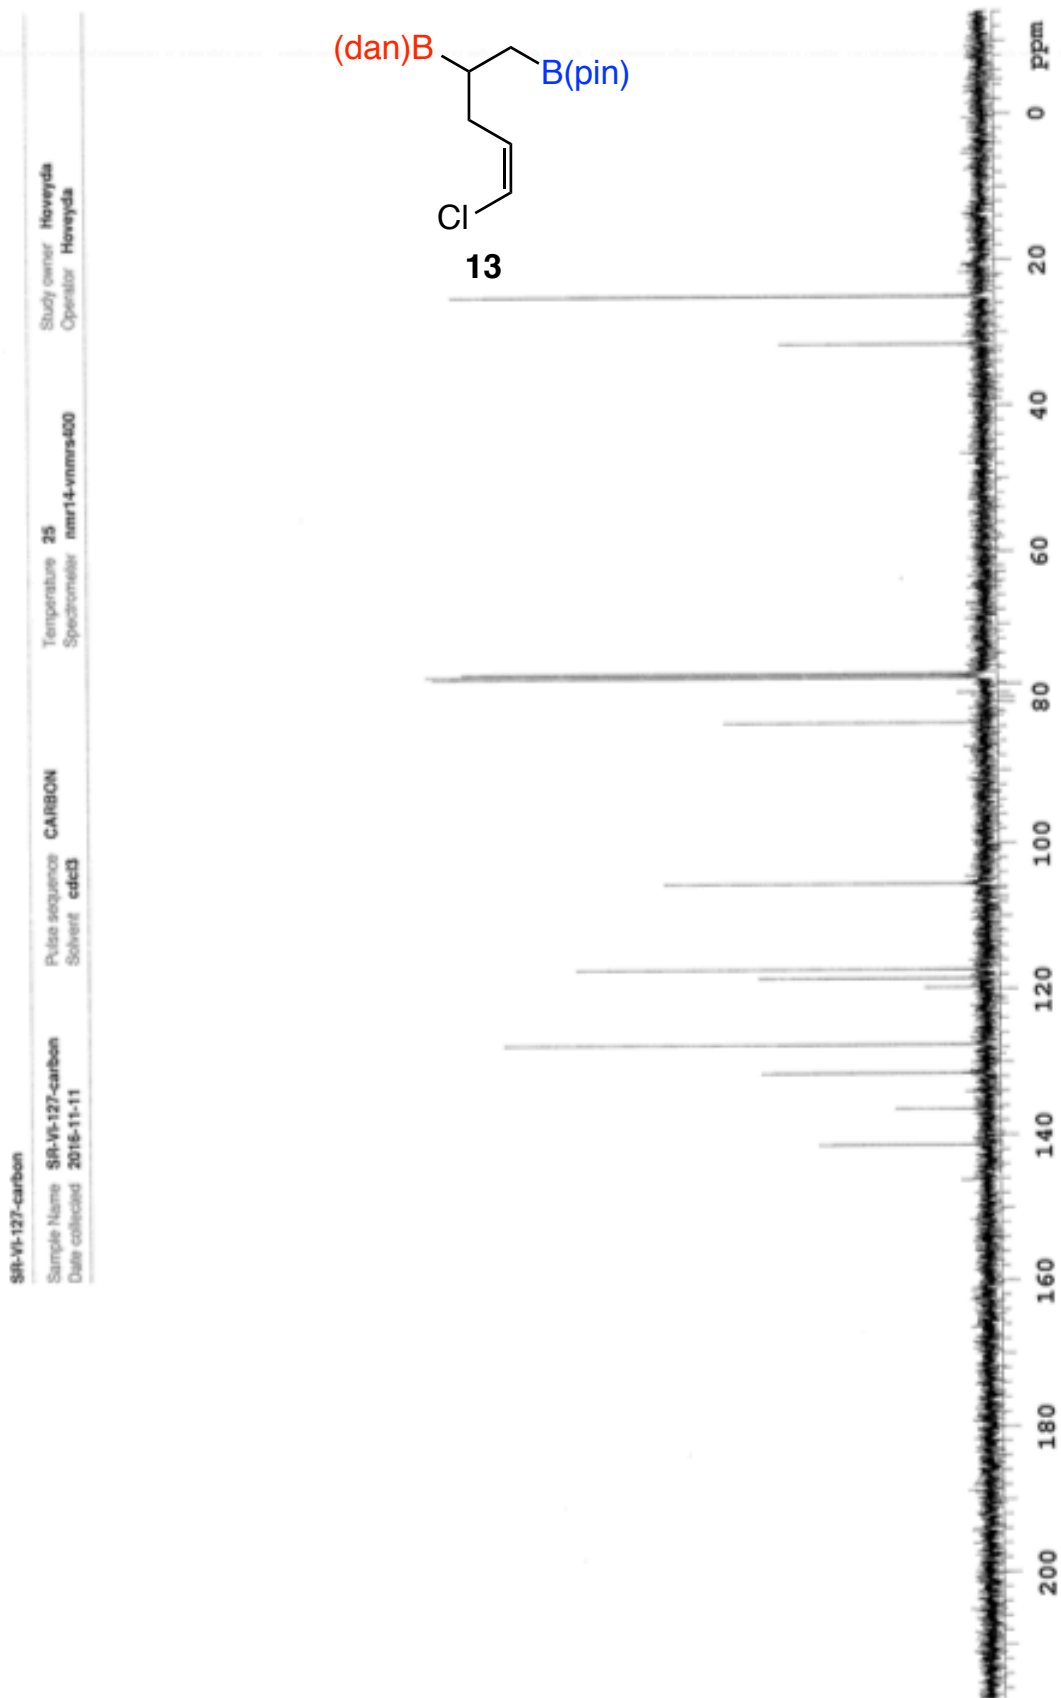



SR-VI-129-carbon

Sample Name SR-VI-129-carbon  
Date collected 2016-11-16

Pulse sequence CARBON  
Solvent cdcl3

Temperature 25  
Spectrometer nuet13-vnmr-400

Study owner mengf  
Operator mengf

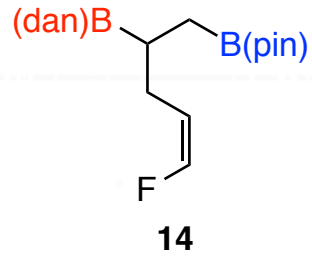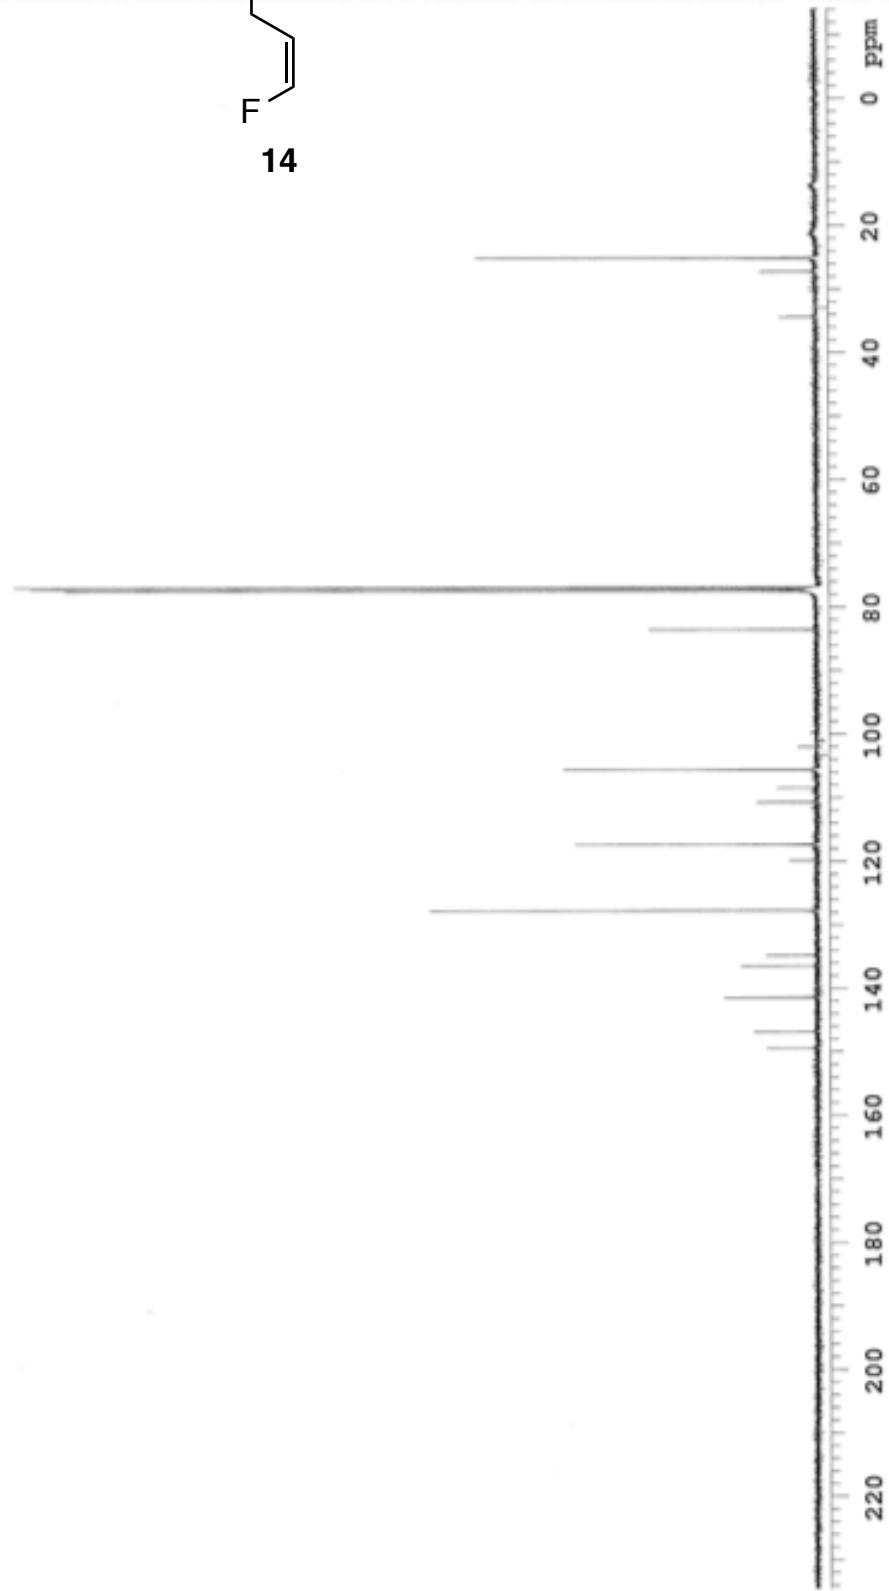

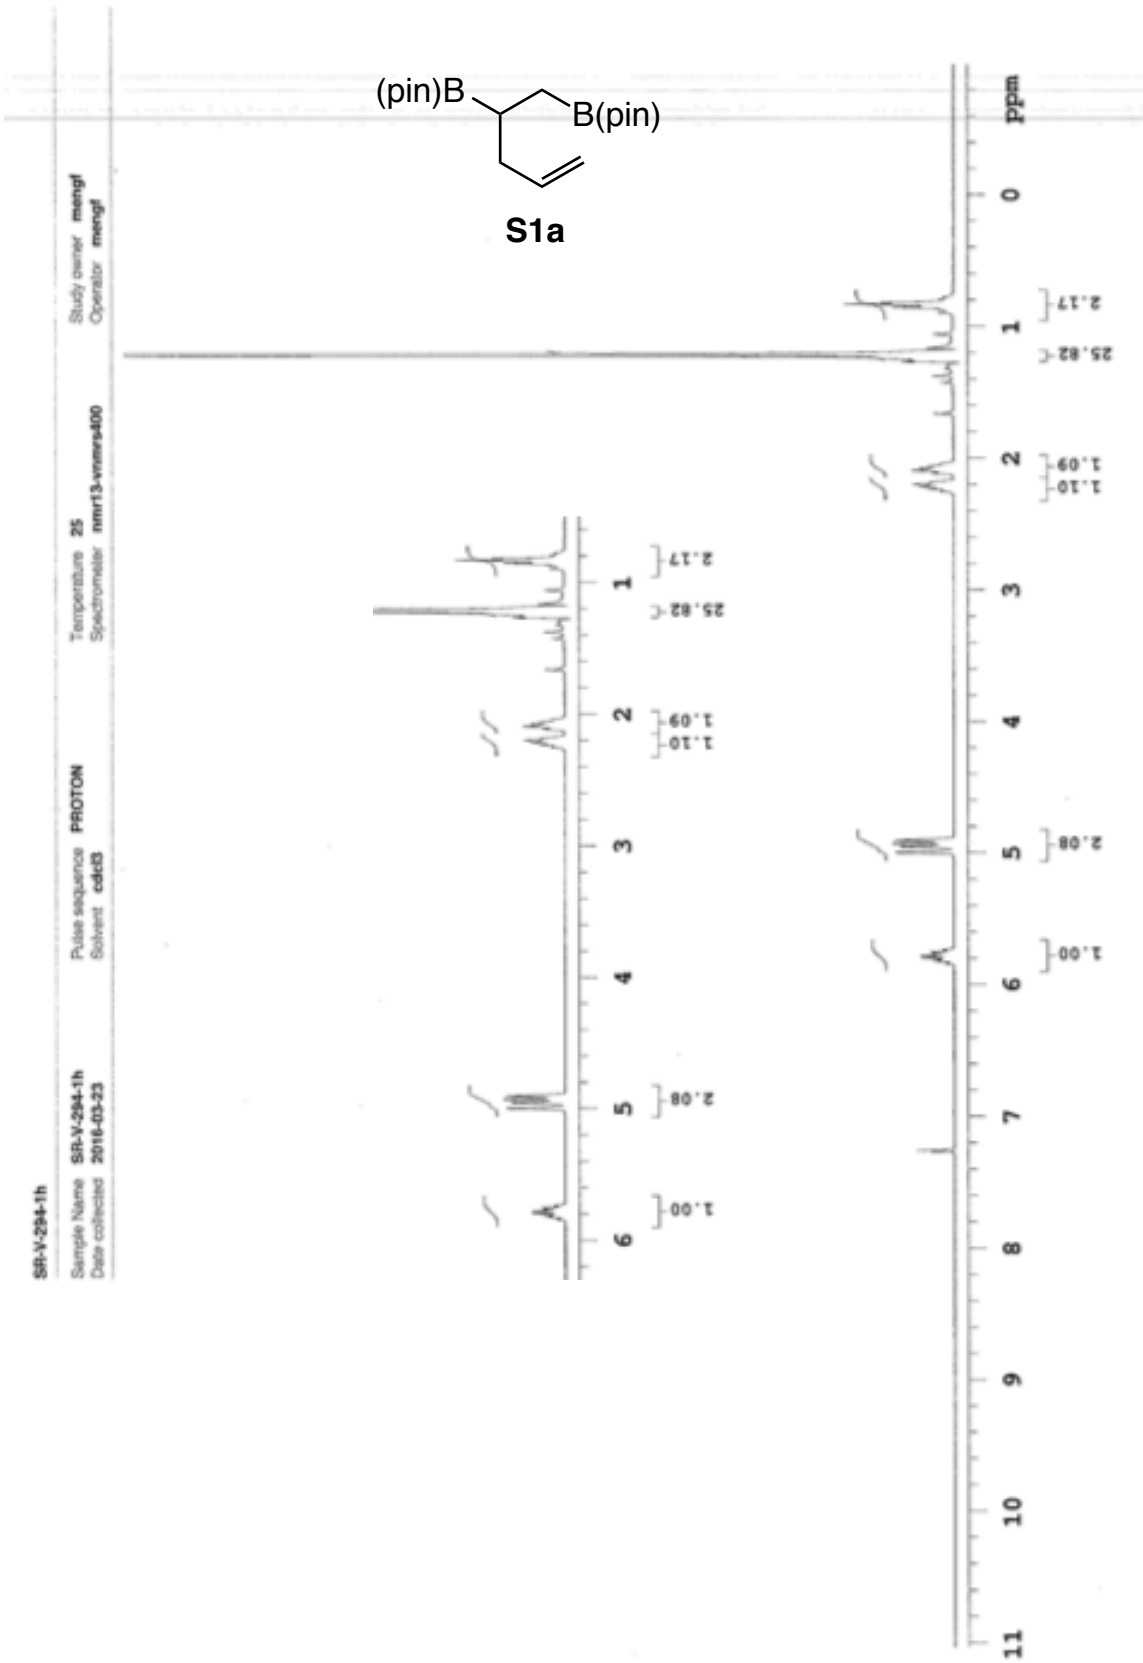

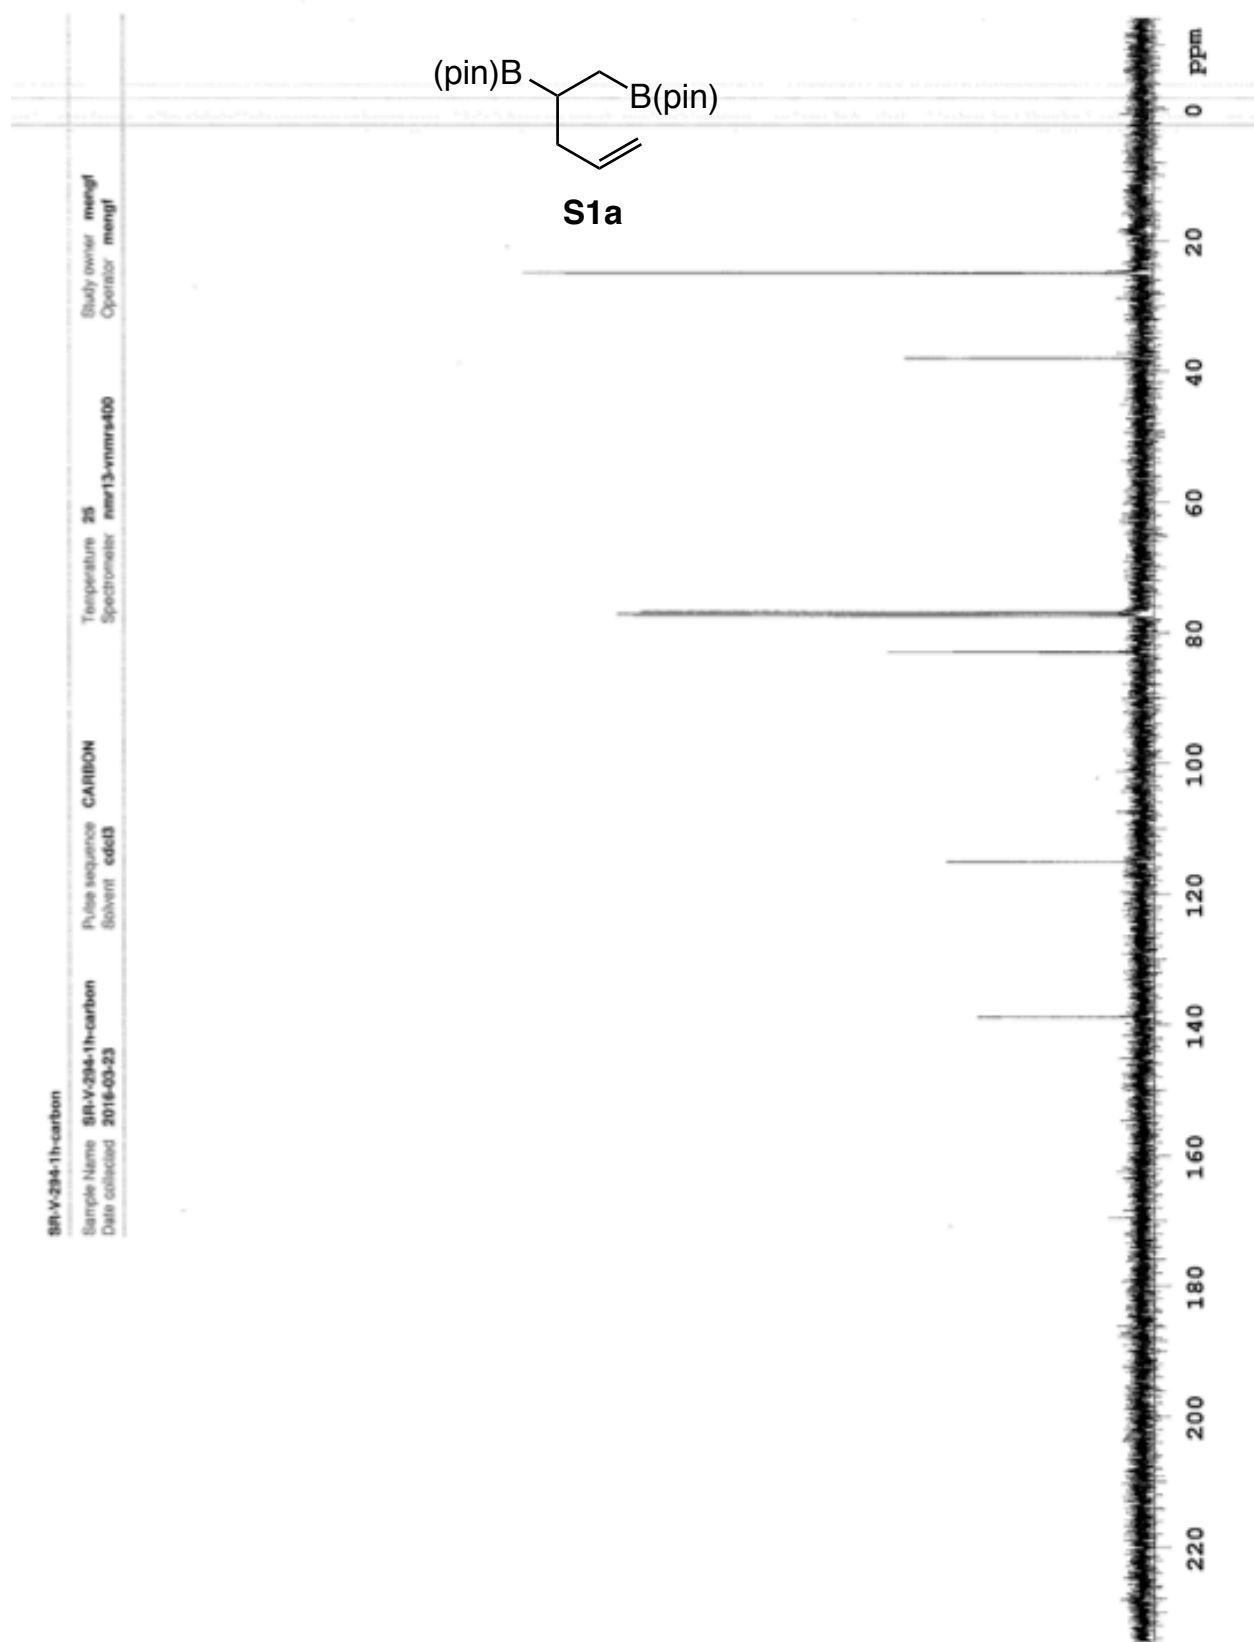

SR-V-236-A  
 Sample Name SR-V-236-A  
 Date collected 2016-07-15  
 Pulse sequence PROTON  
 Solvent cddc13  
 Temperature 25  
 Spectrometer mmr13-vnmrs400  
 Study owner mengf  
 Operator mengf

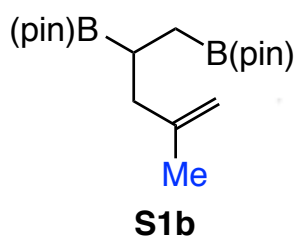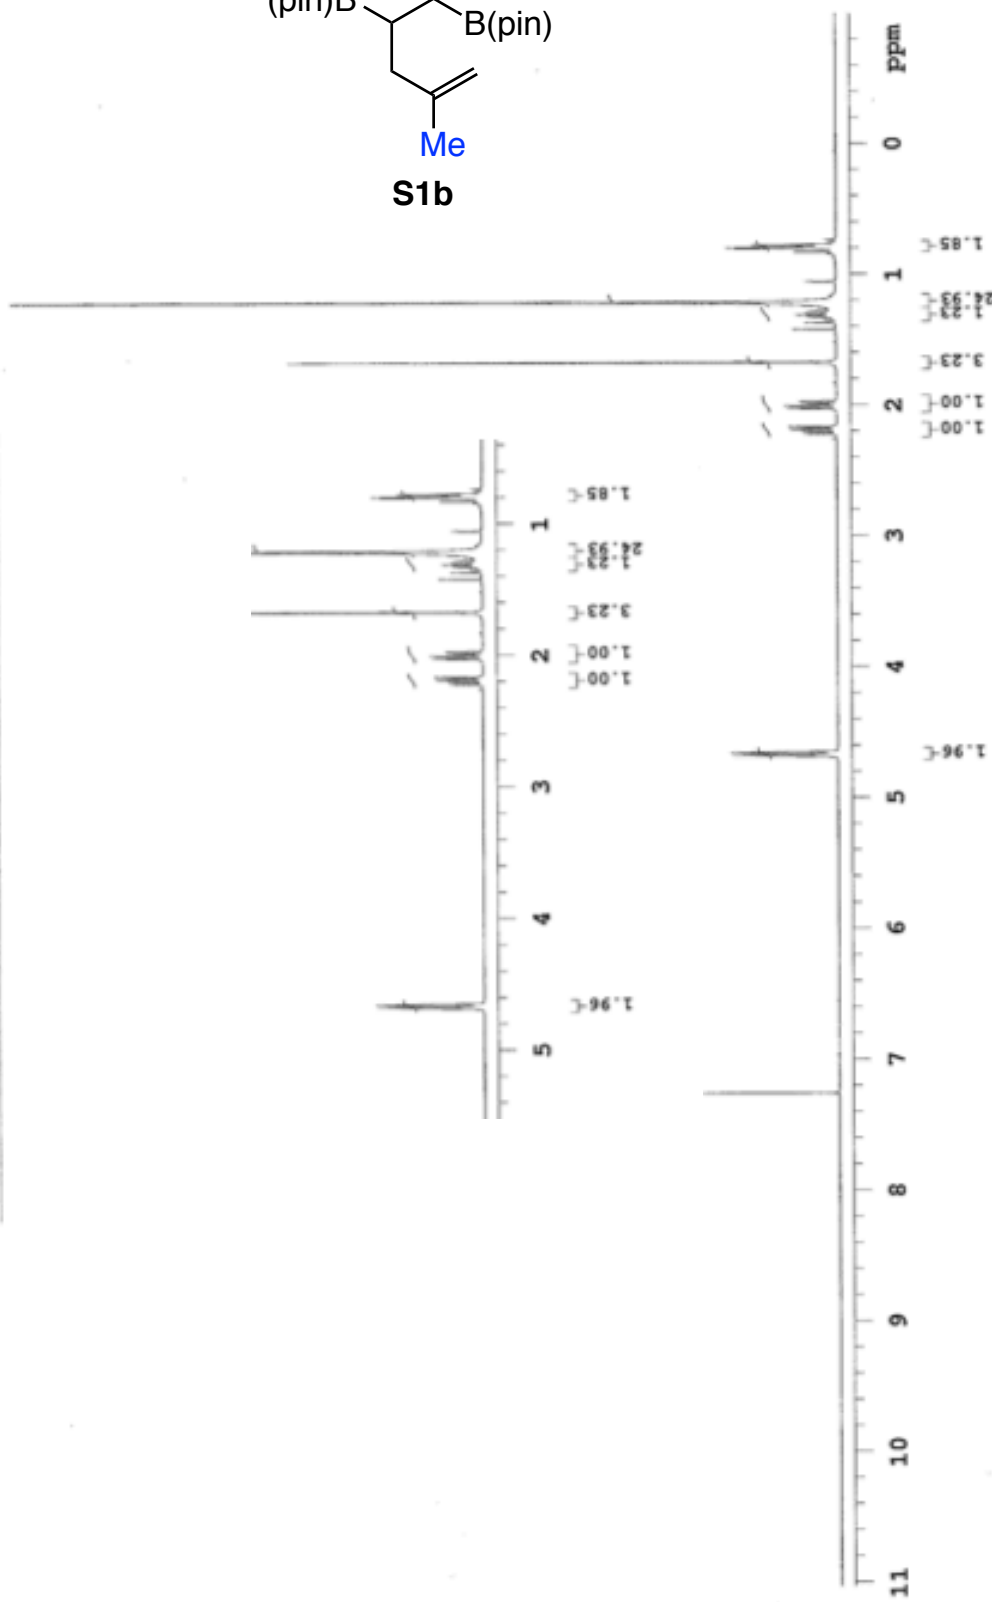

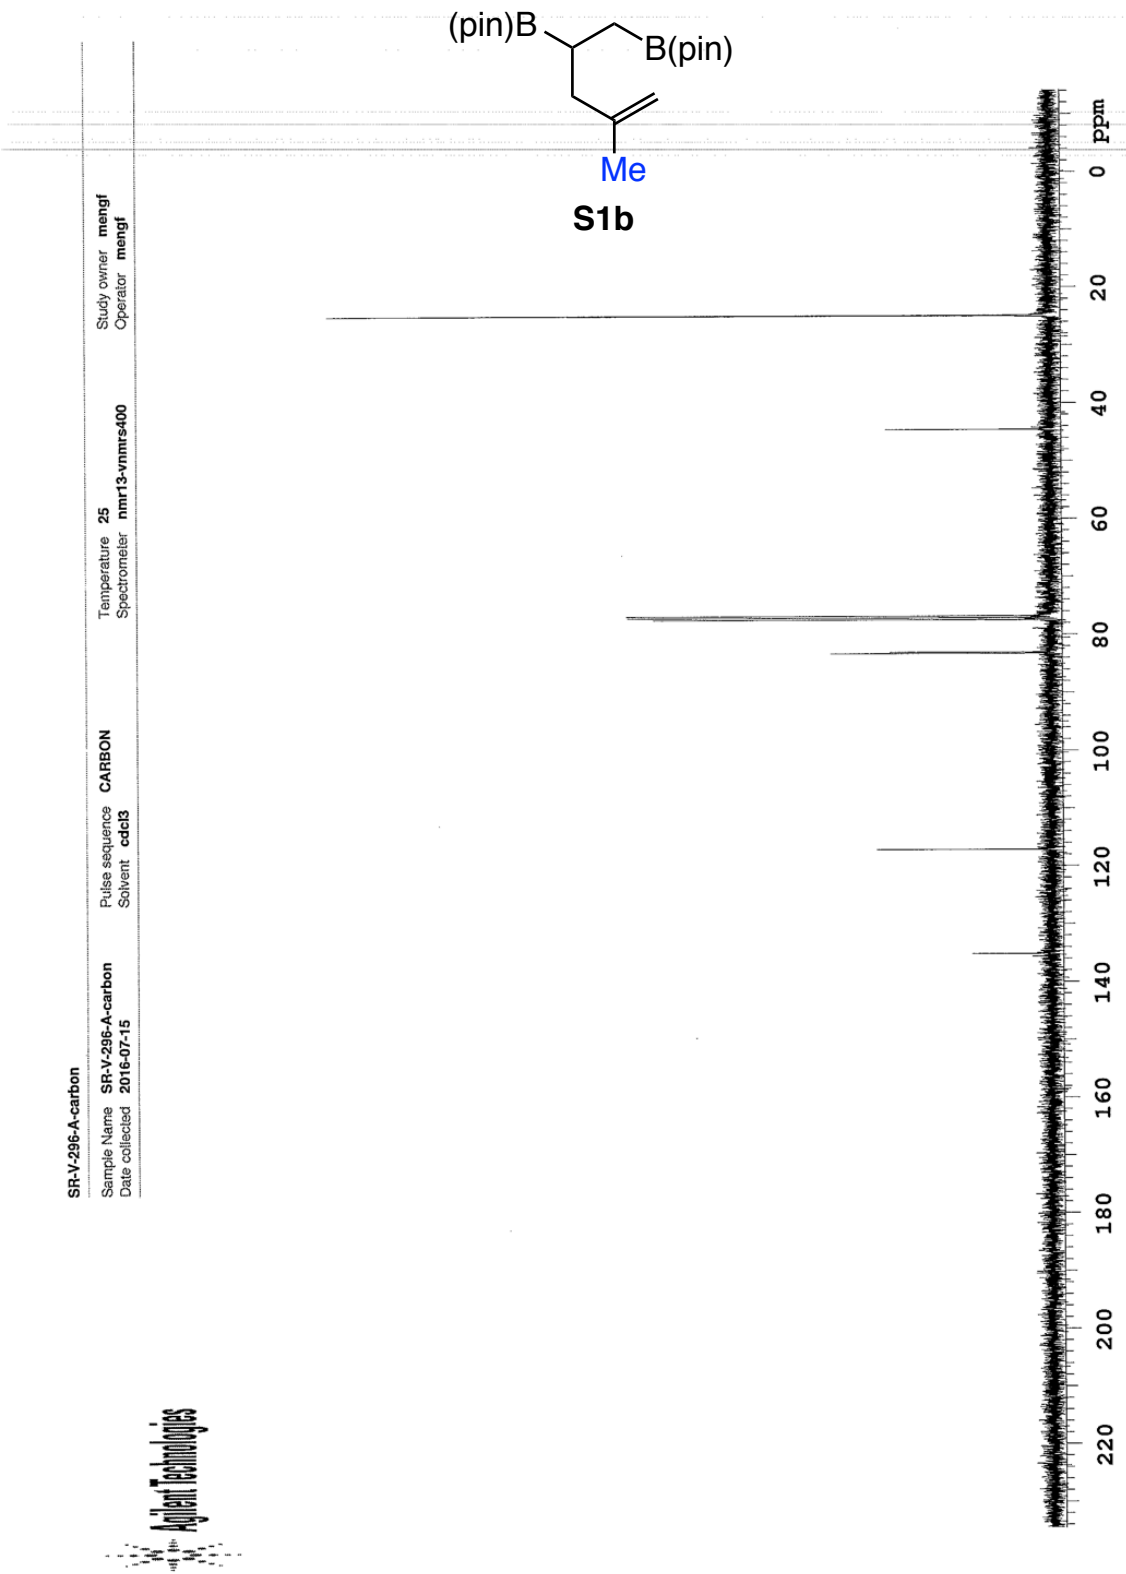

Plot date 2016-07-25

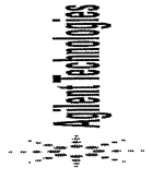

Data file #home/ahh/Benz/SR-V-296-A-carbon.fid





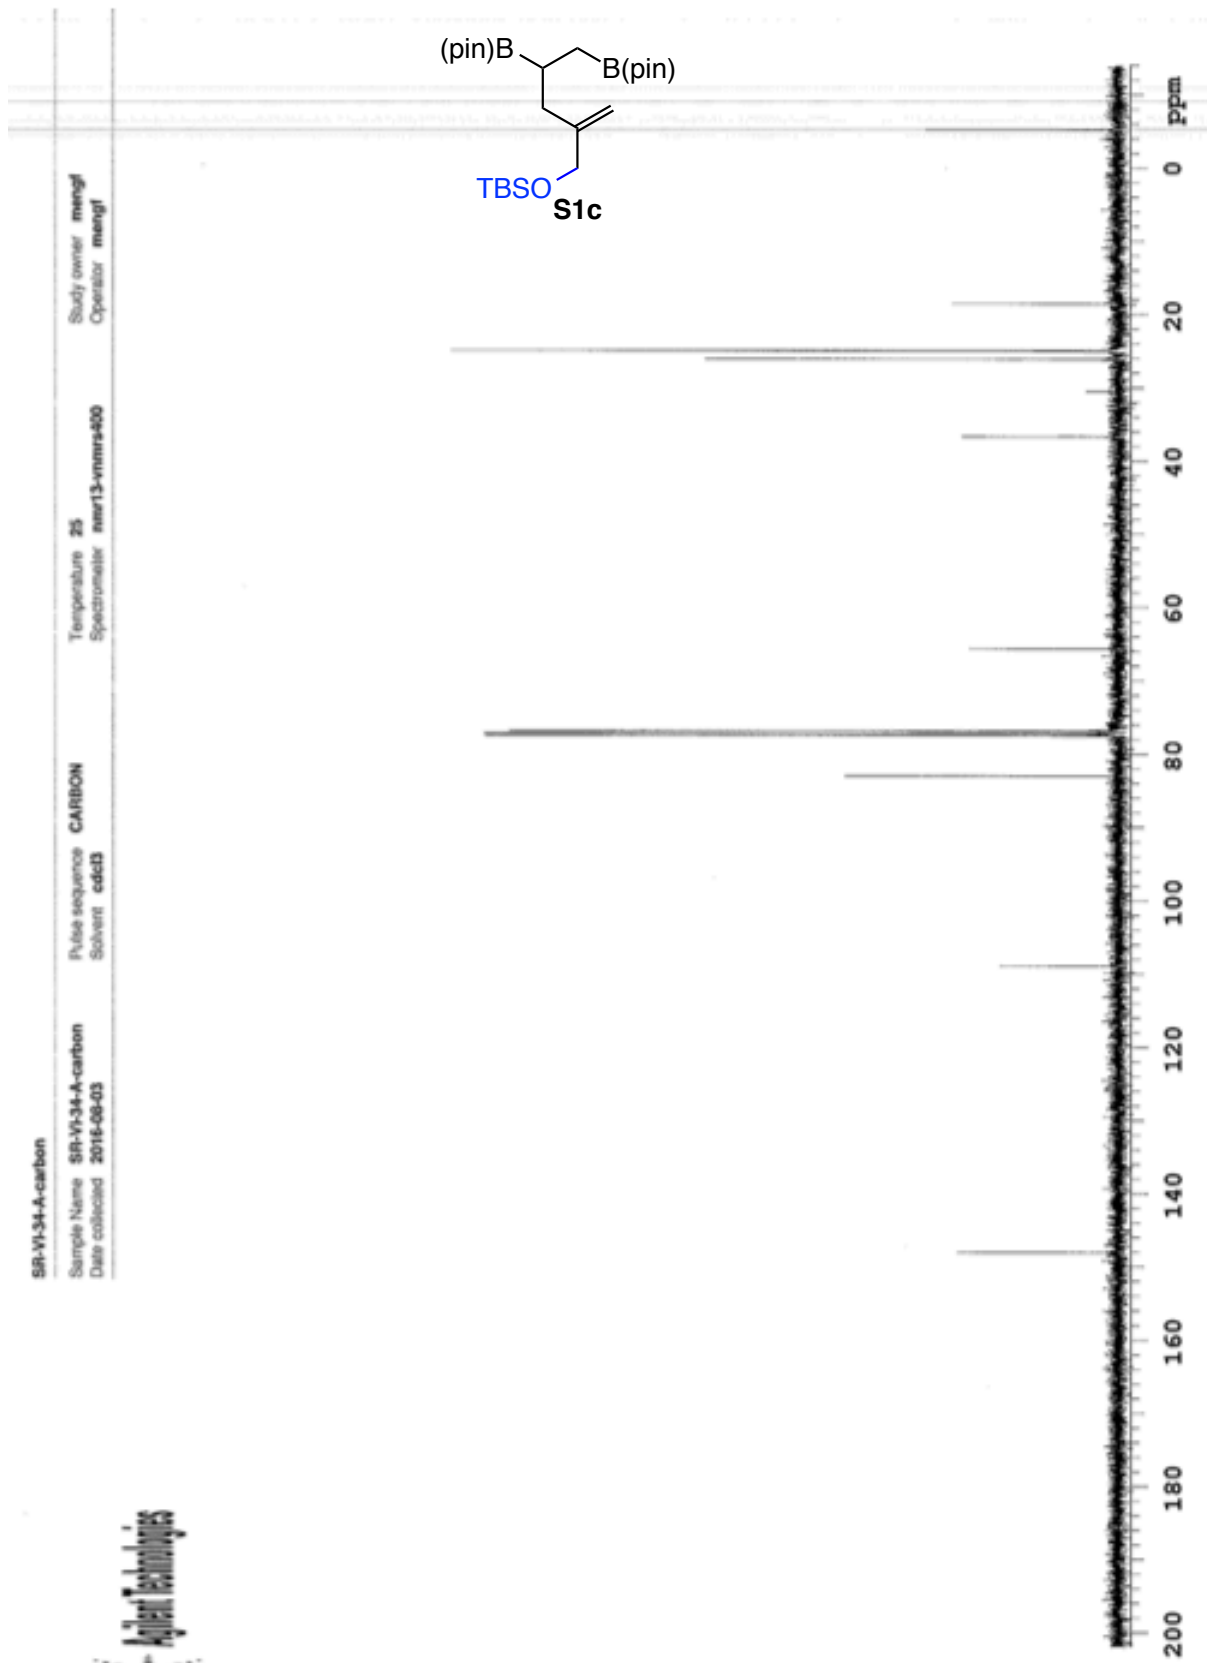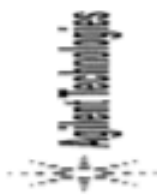



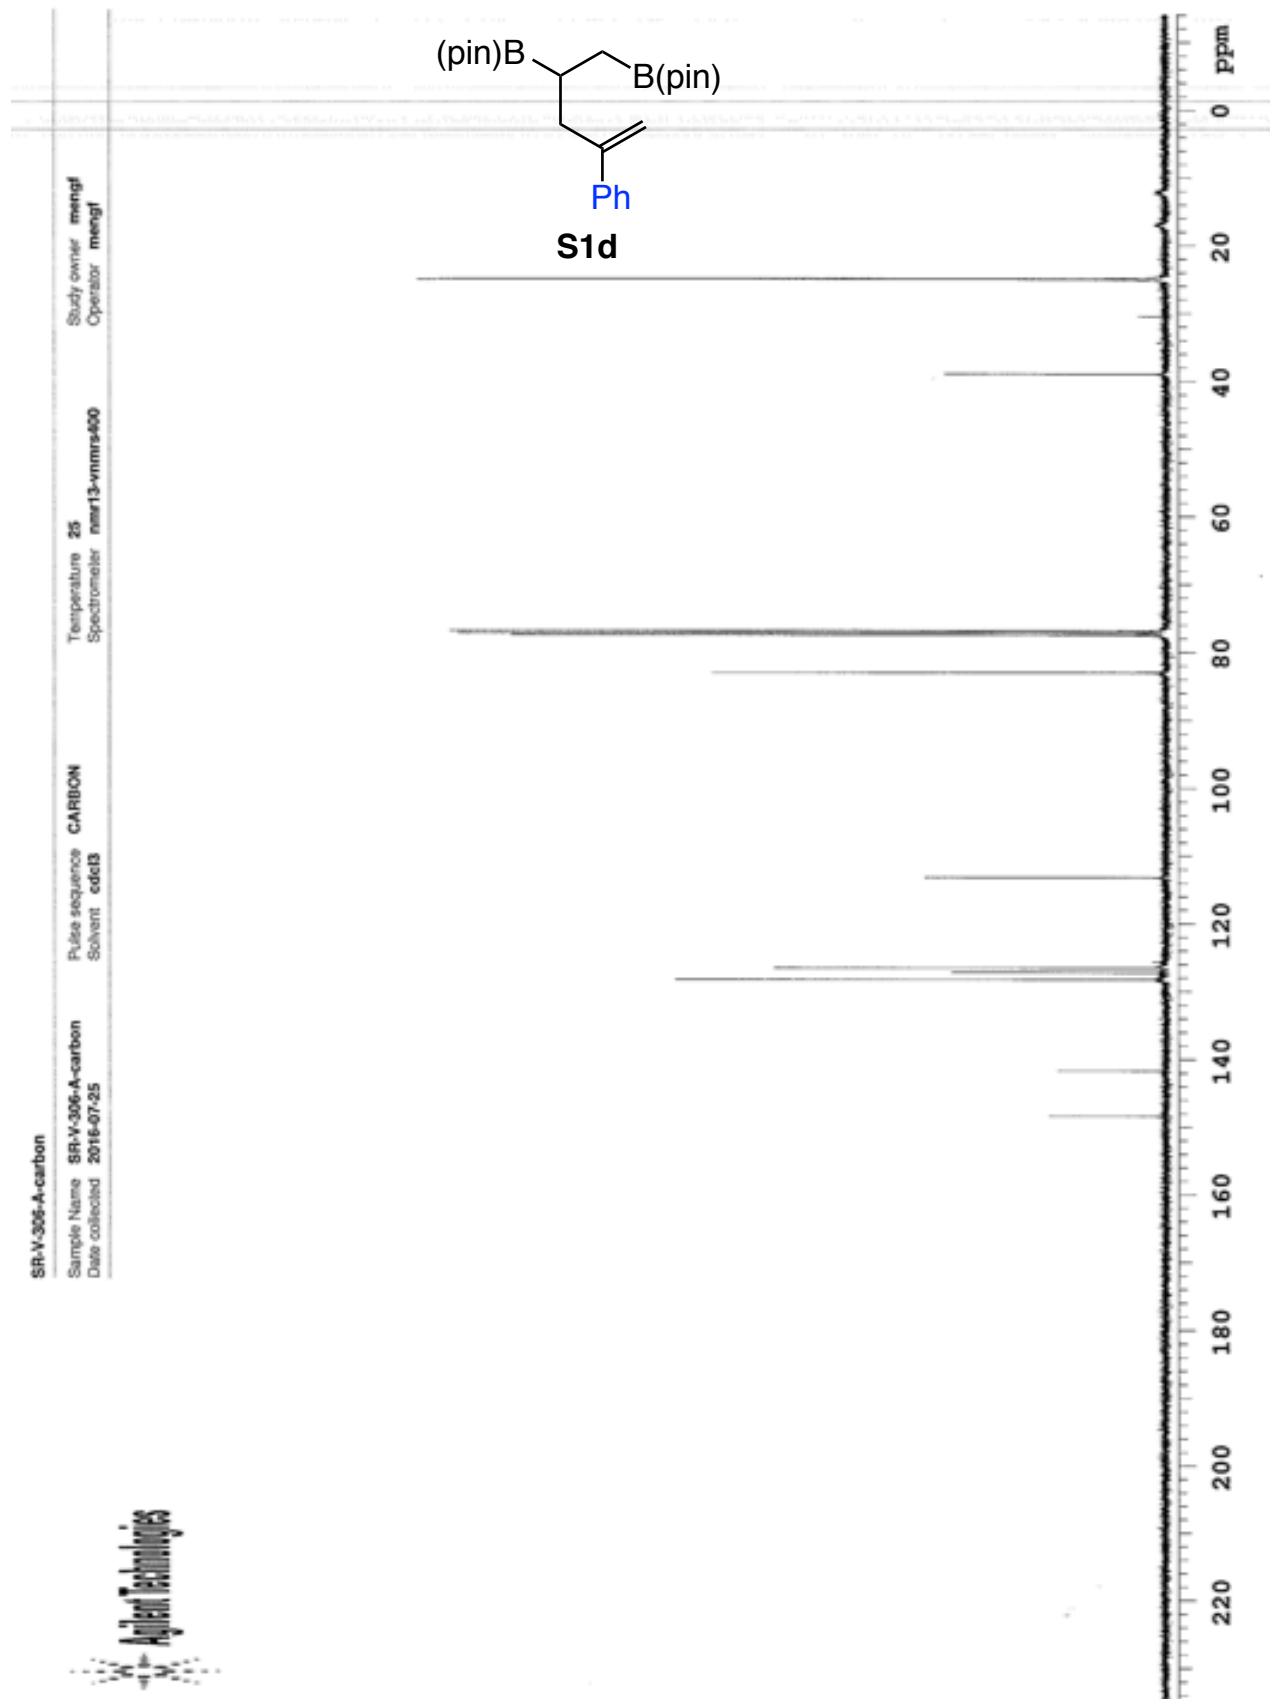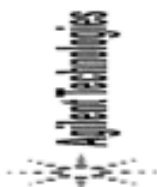

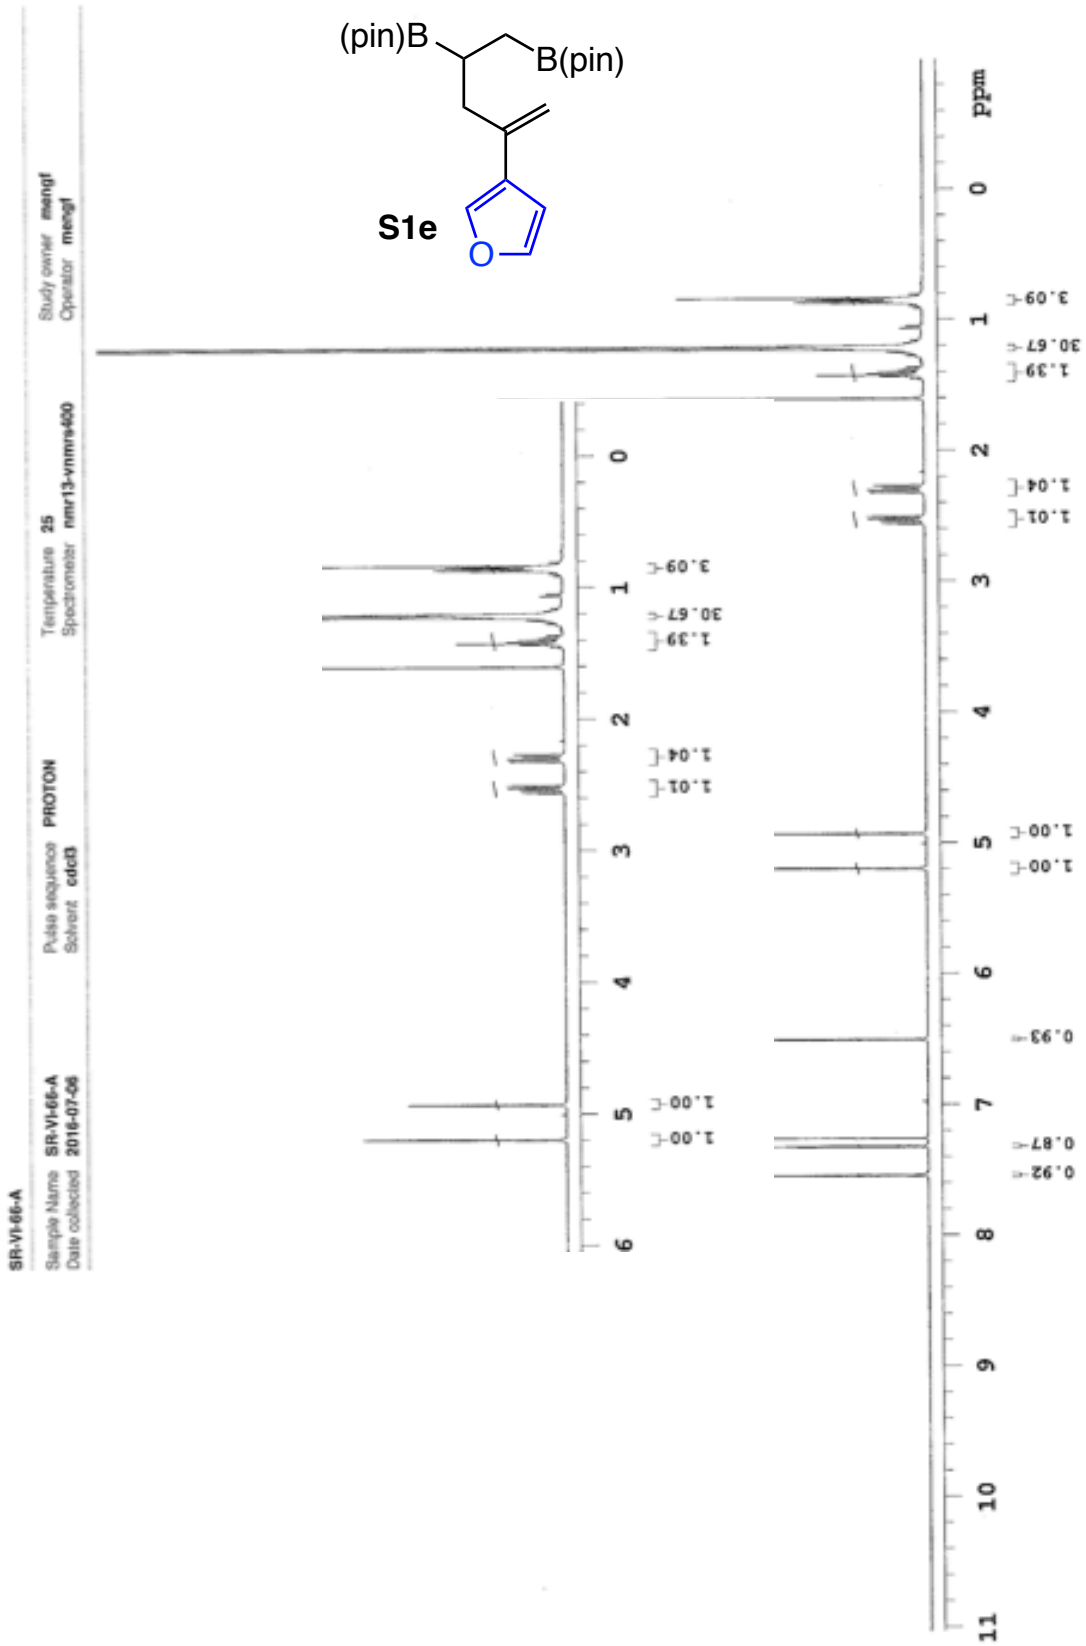



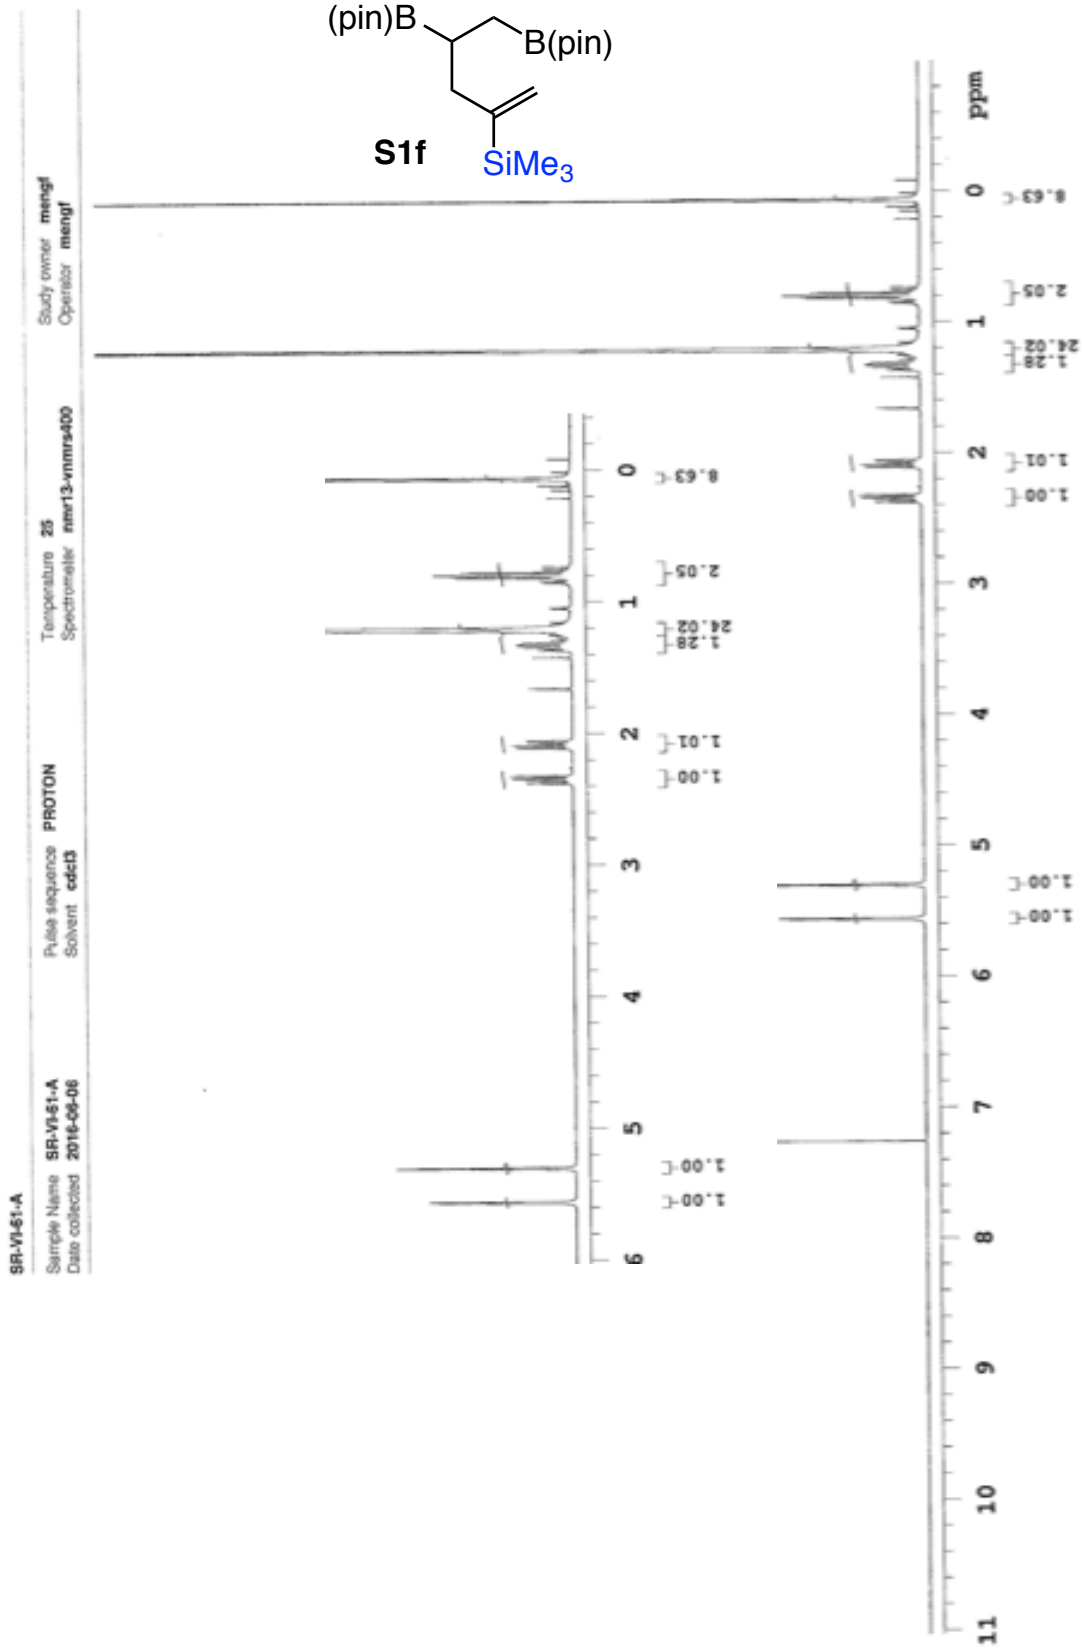

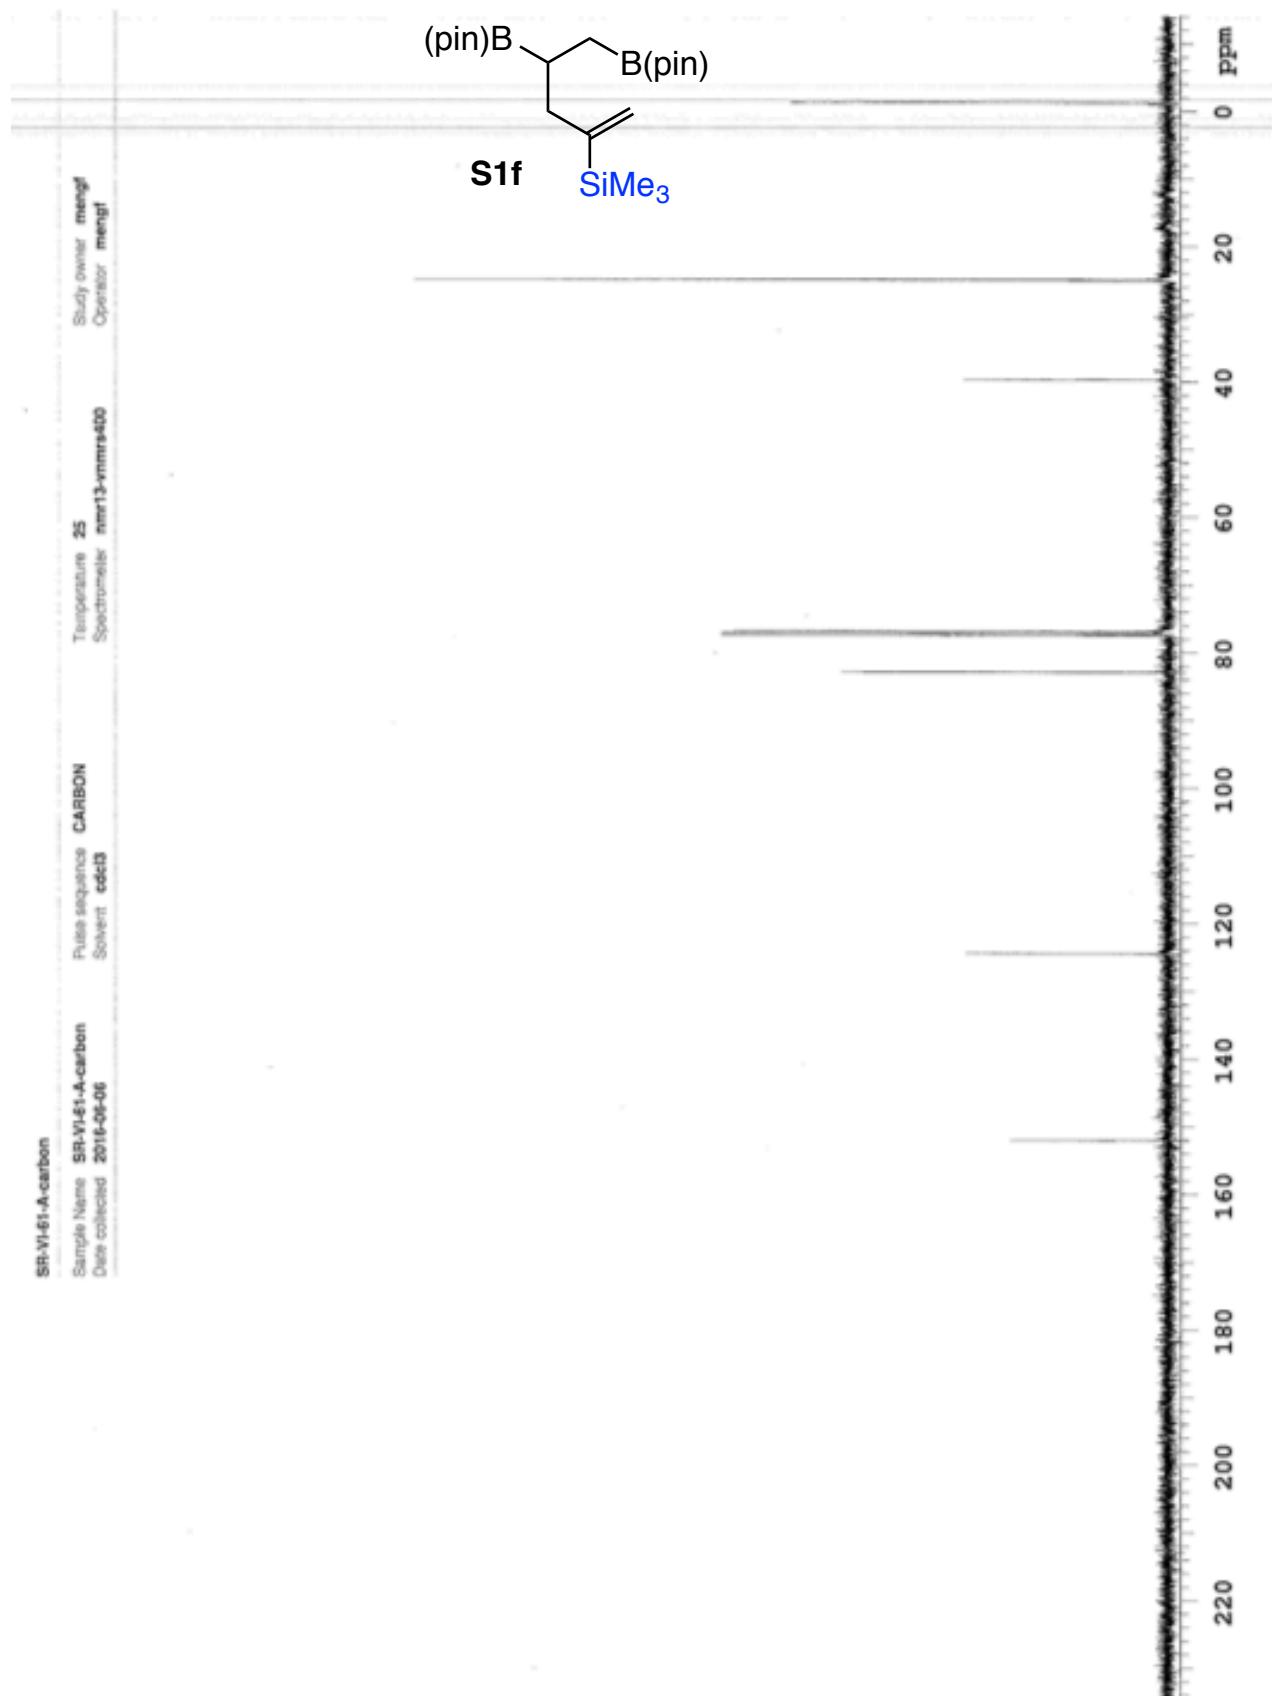





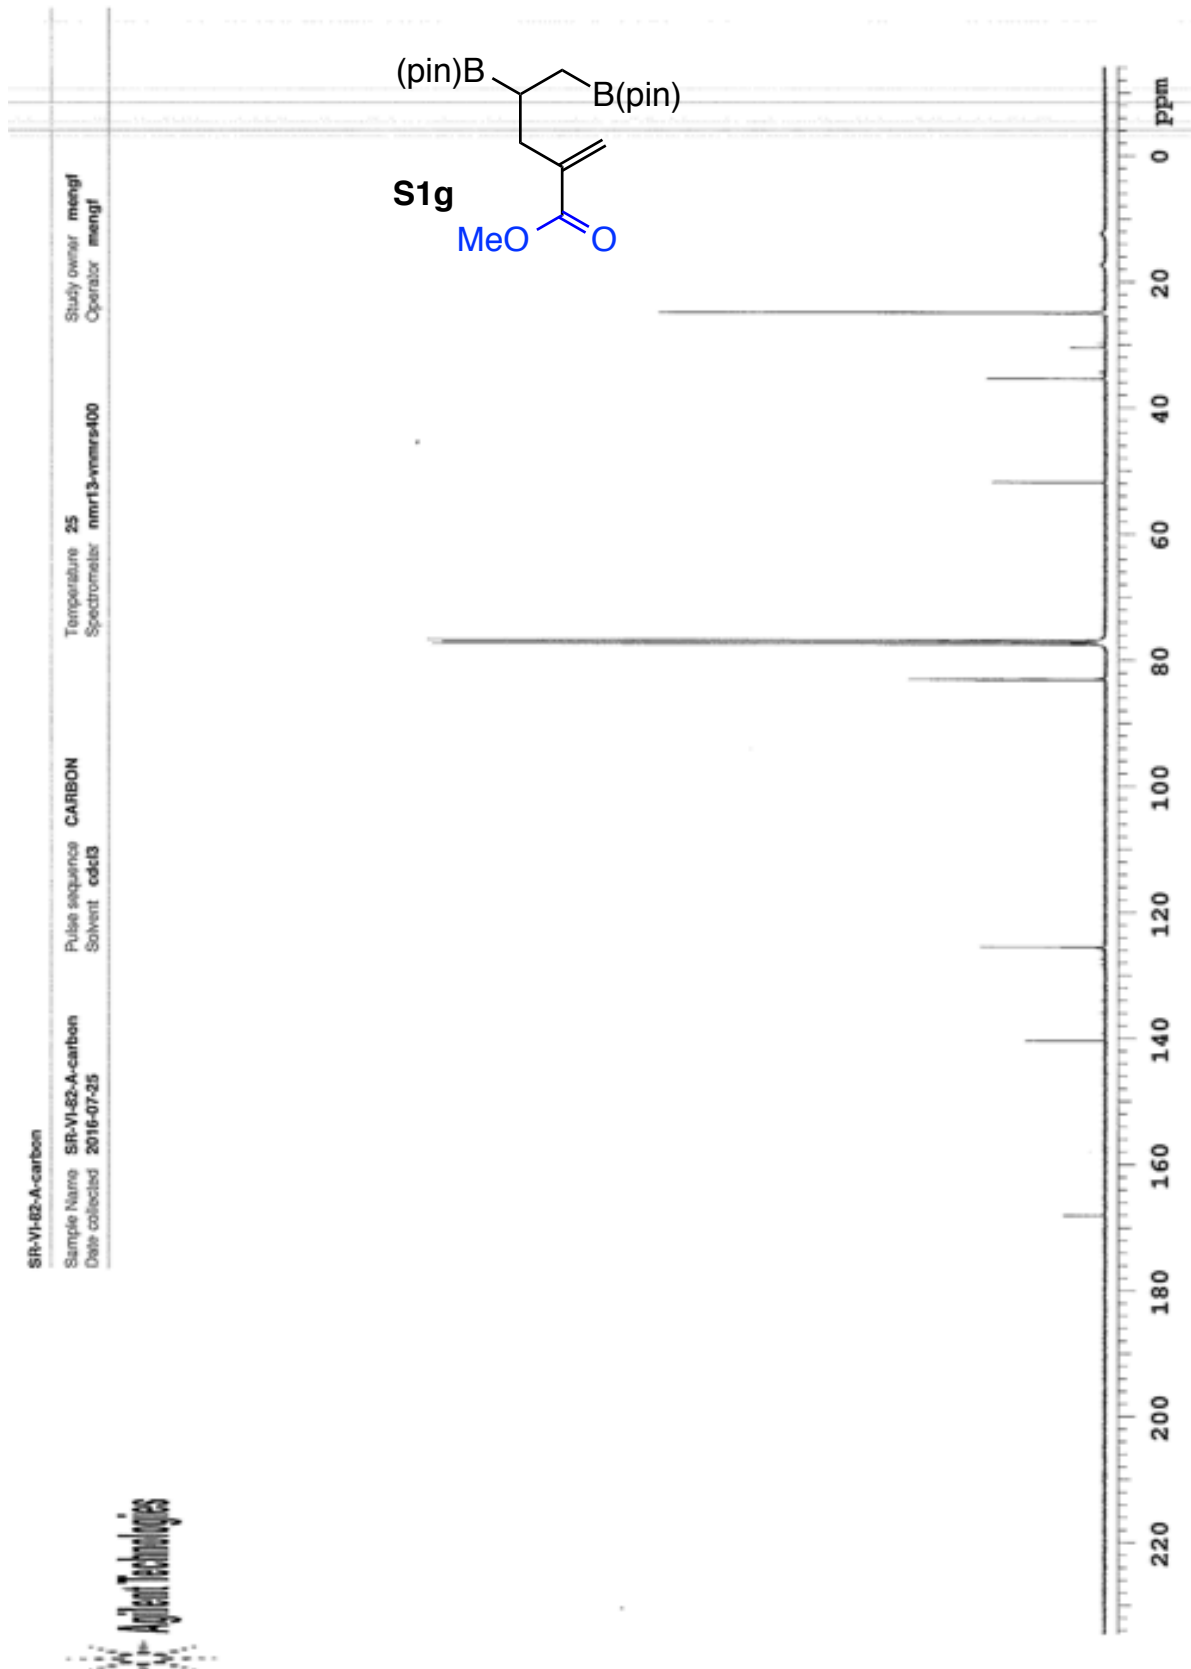

SR-VI-82-A-carbon

Sample Name SR-VI-82-A-carbon  
Date collected 2016-07-25

Pulse sequence CARBON  
Solvent cdcl3

Temperature 25  
Spectrometer nmr13-vnmrs400

Study owner mengf  
Operator mengf

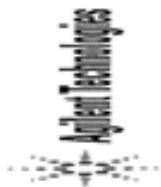

**SR-V-296-B**  
 Sample Name **SR-V-296-B**  
 Date collected **2016-07-15**  
 Pulse sequence **PROTON**  
 Solvent **cdcl3**  
 Temperature **25**  
 Spectrometer **nmr13-vnmrs400**  
 Study owner **mengf**  
 Operator **mengf**

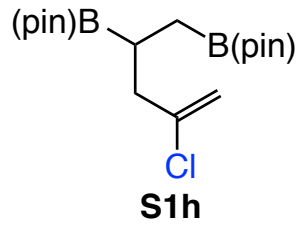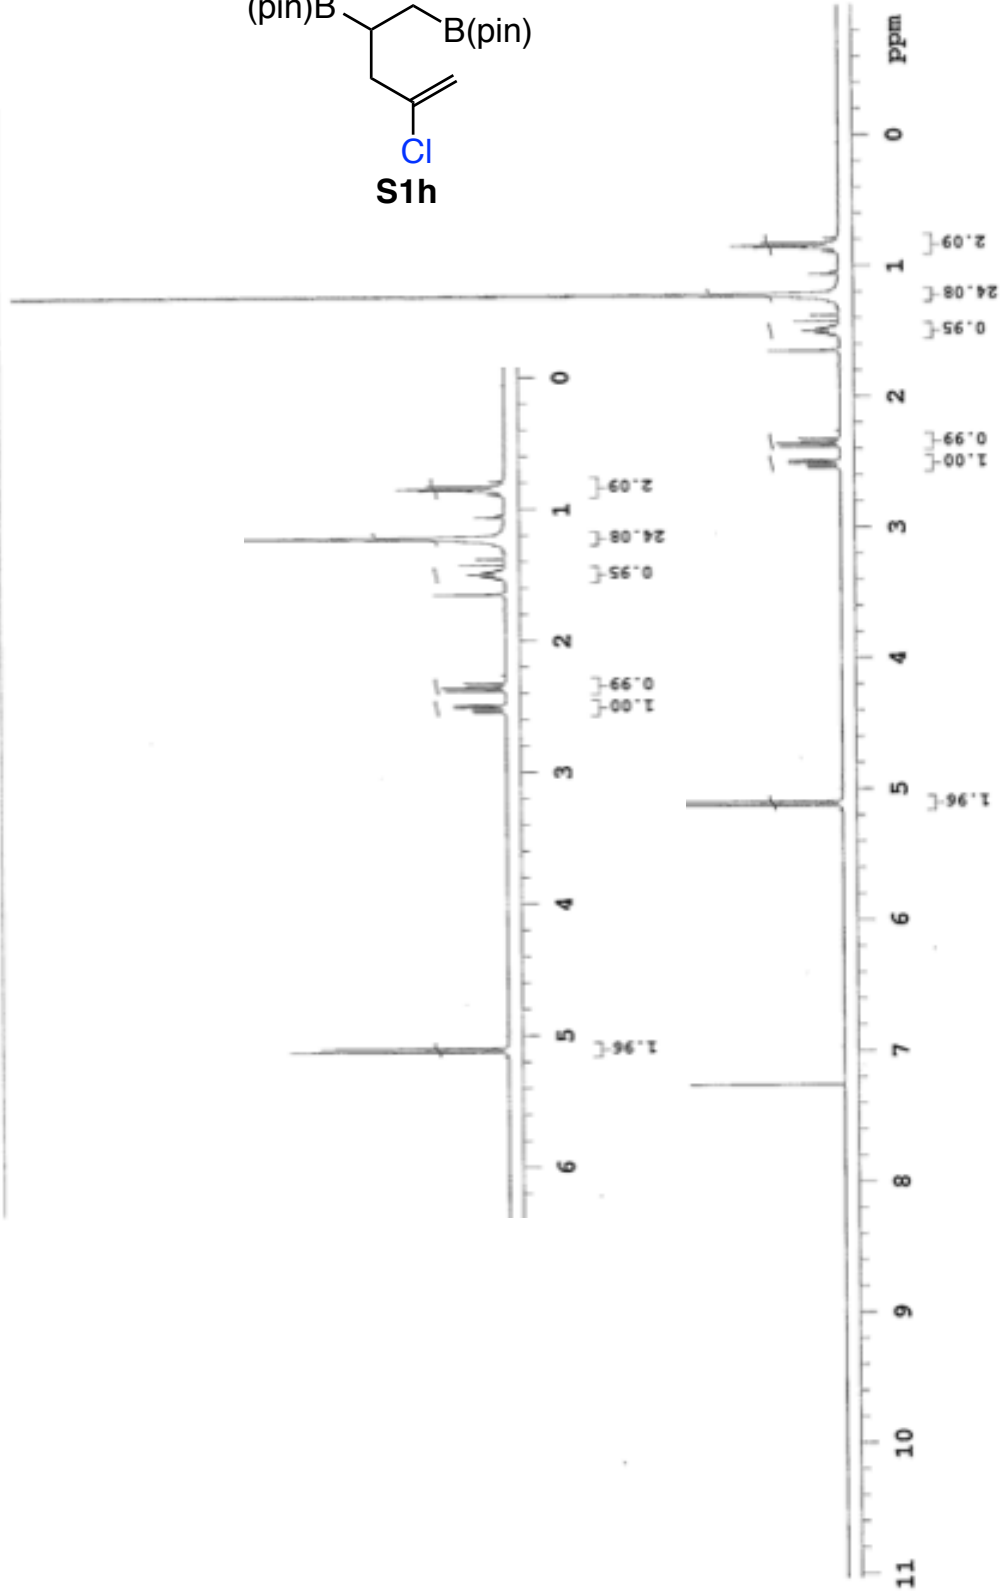

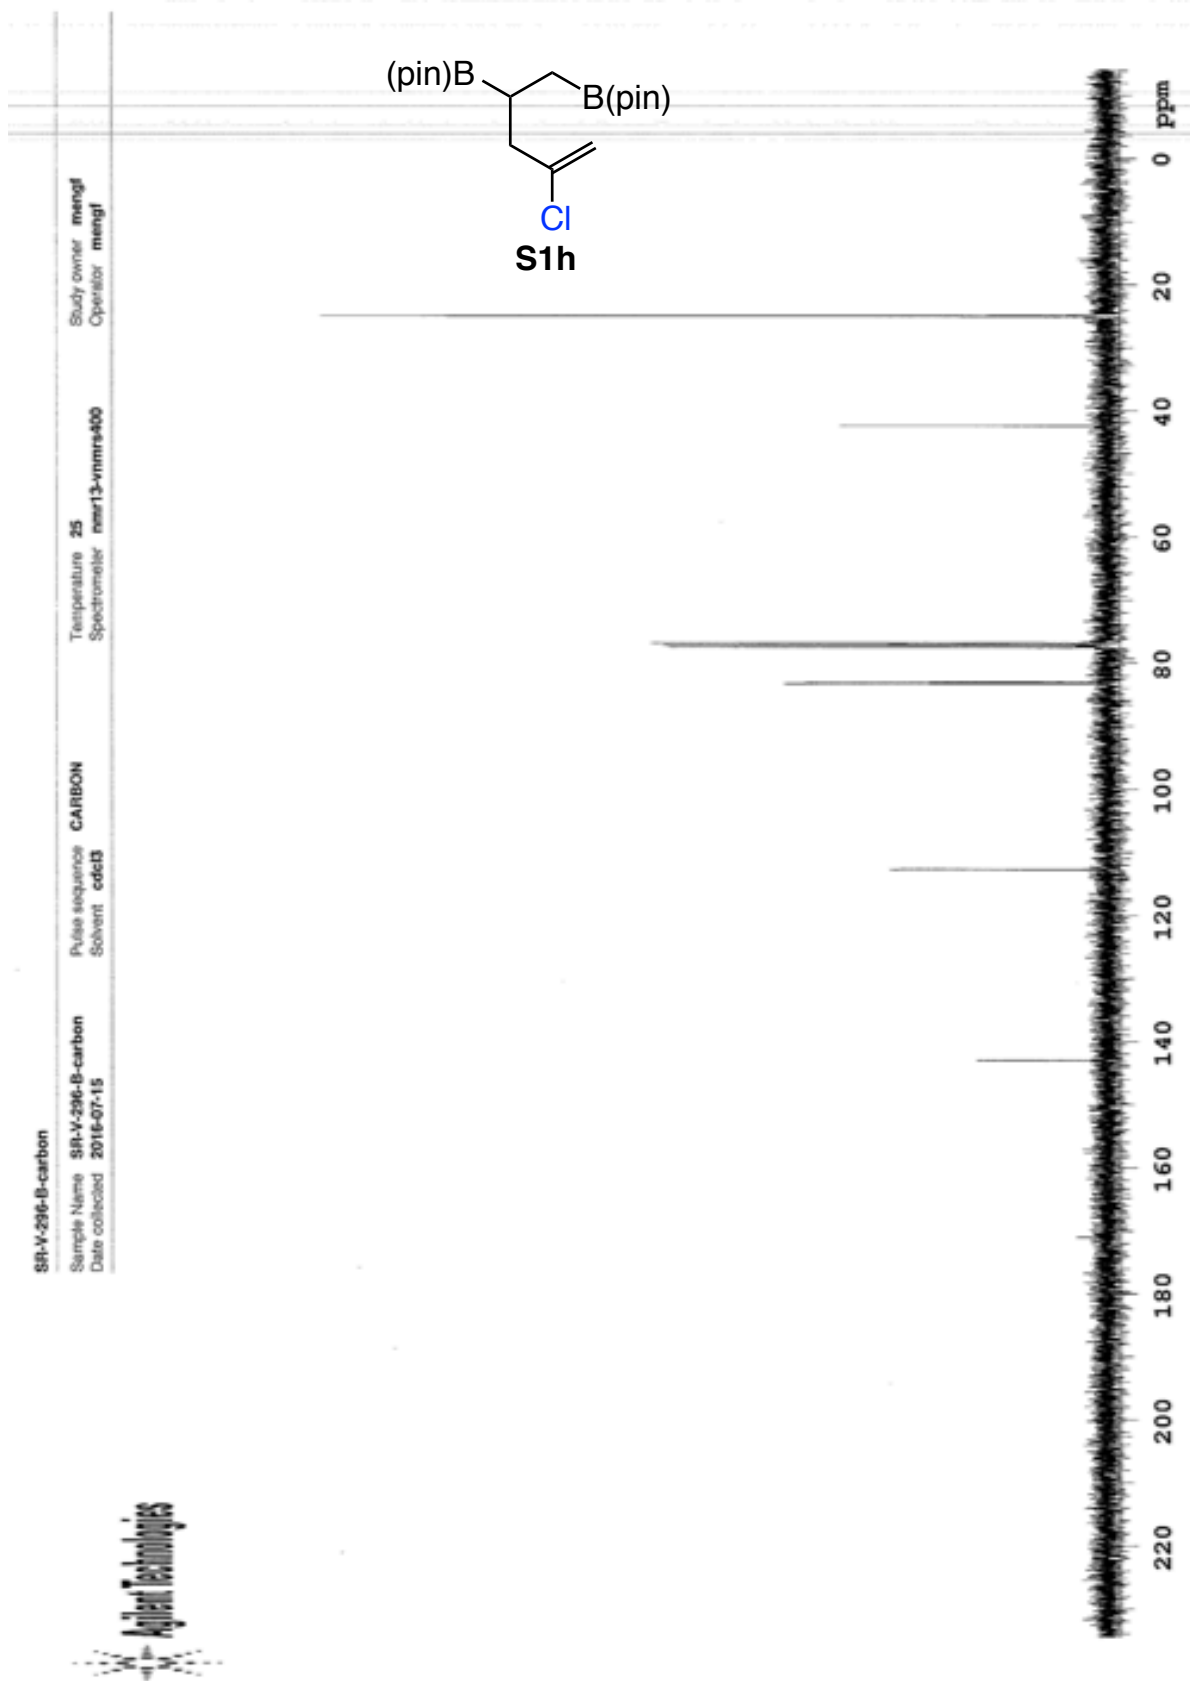



SR-V-296-C-carbon

Sample Name SR-V-296-C-carbon  
Date collected 2016-07-15

Pulse sequence  
Solvent cddcb

CARBON

Temperature 25  
Spectrometer nmr13-nmrs400

Study owner  
Operator mengf

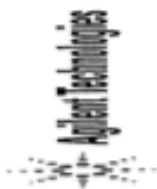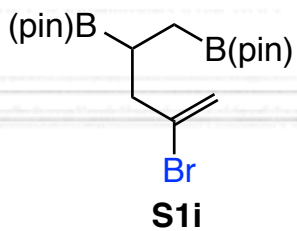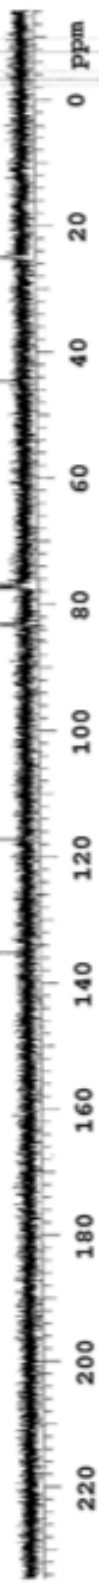



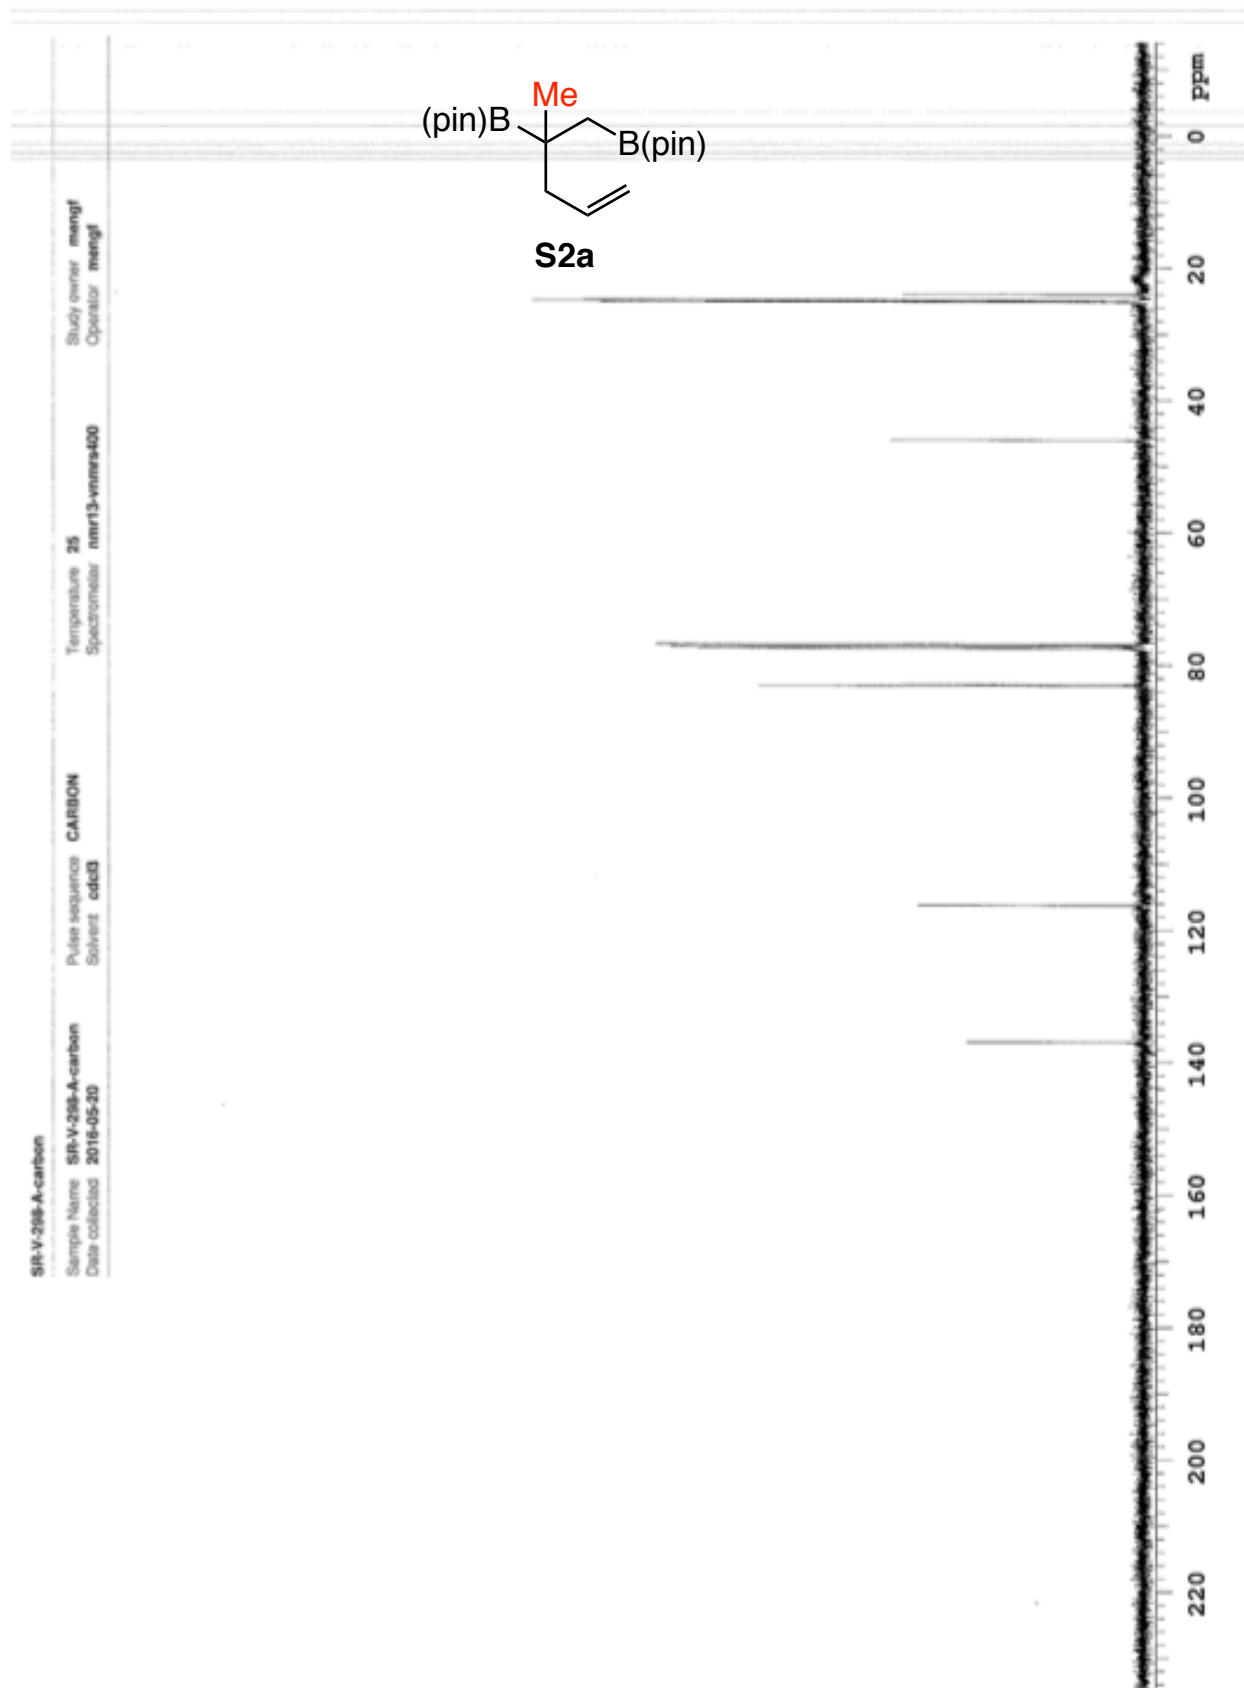





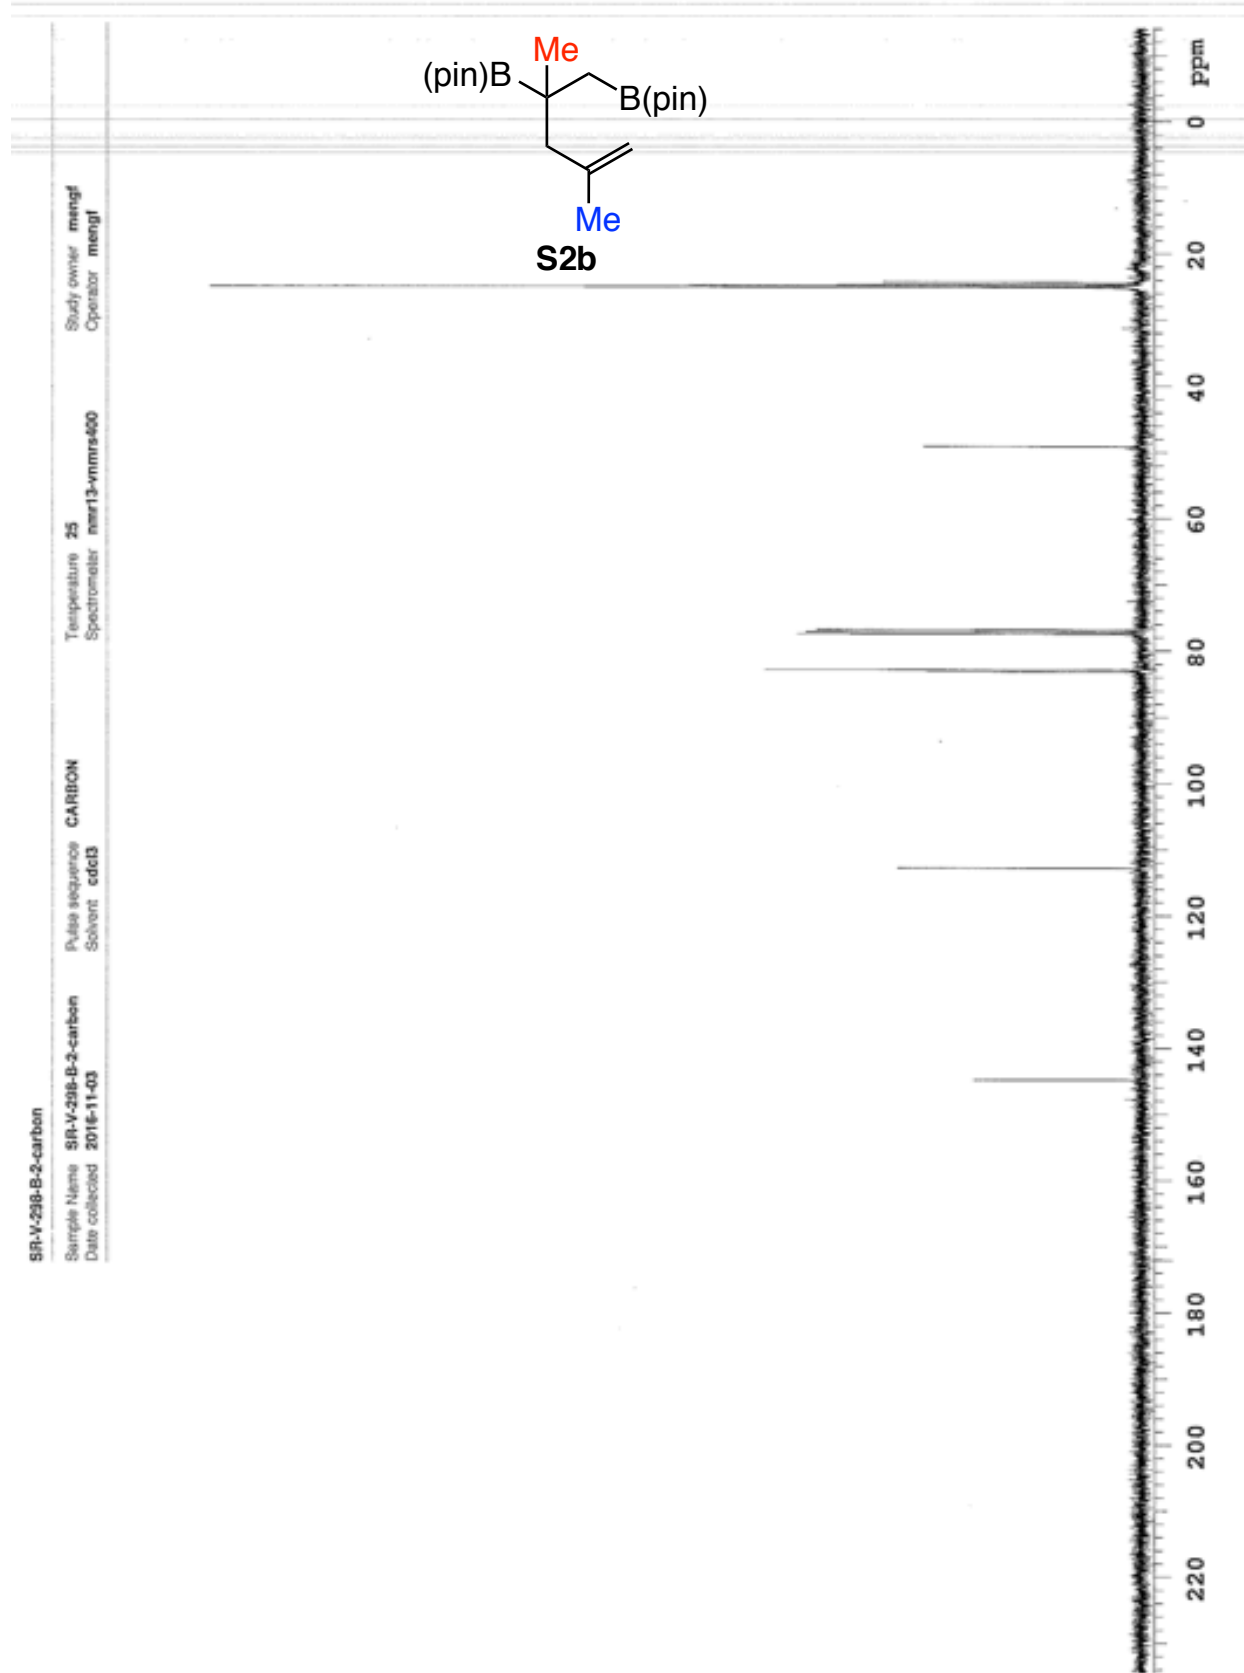





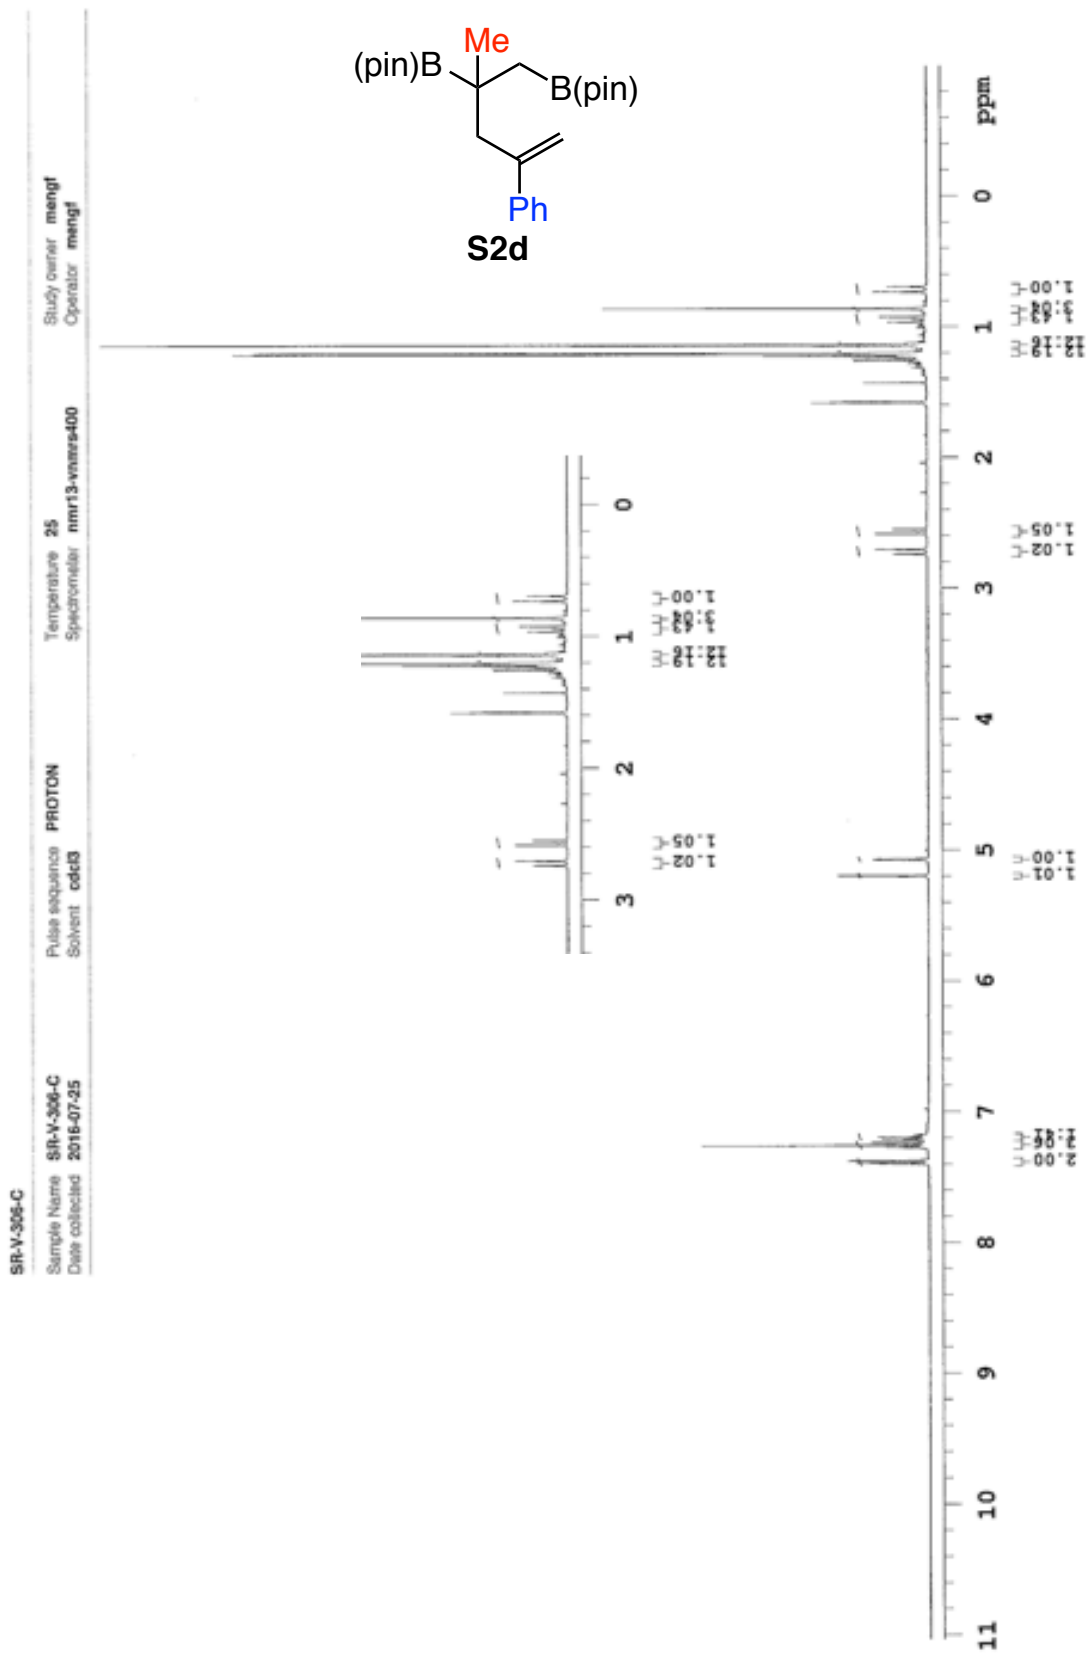

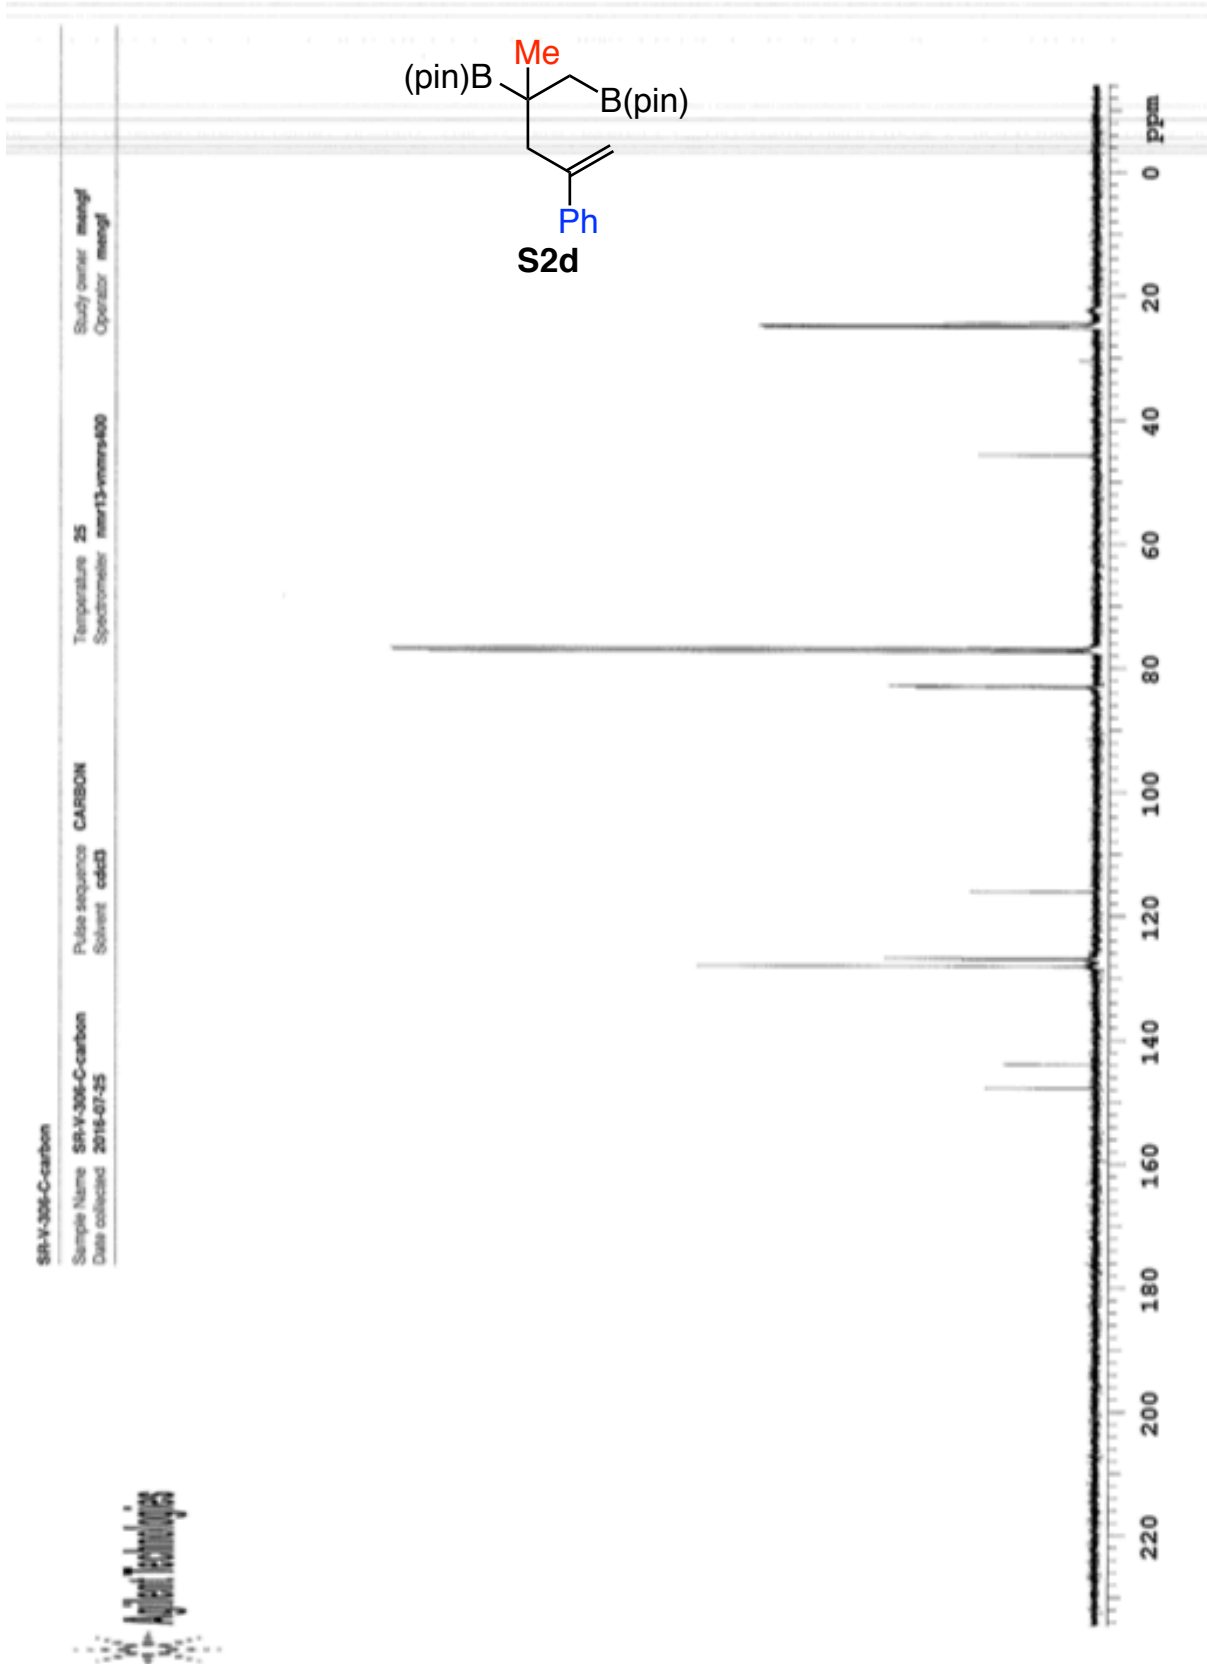



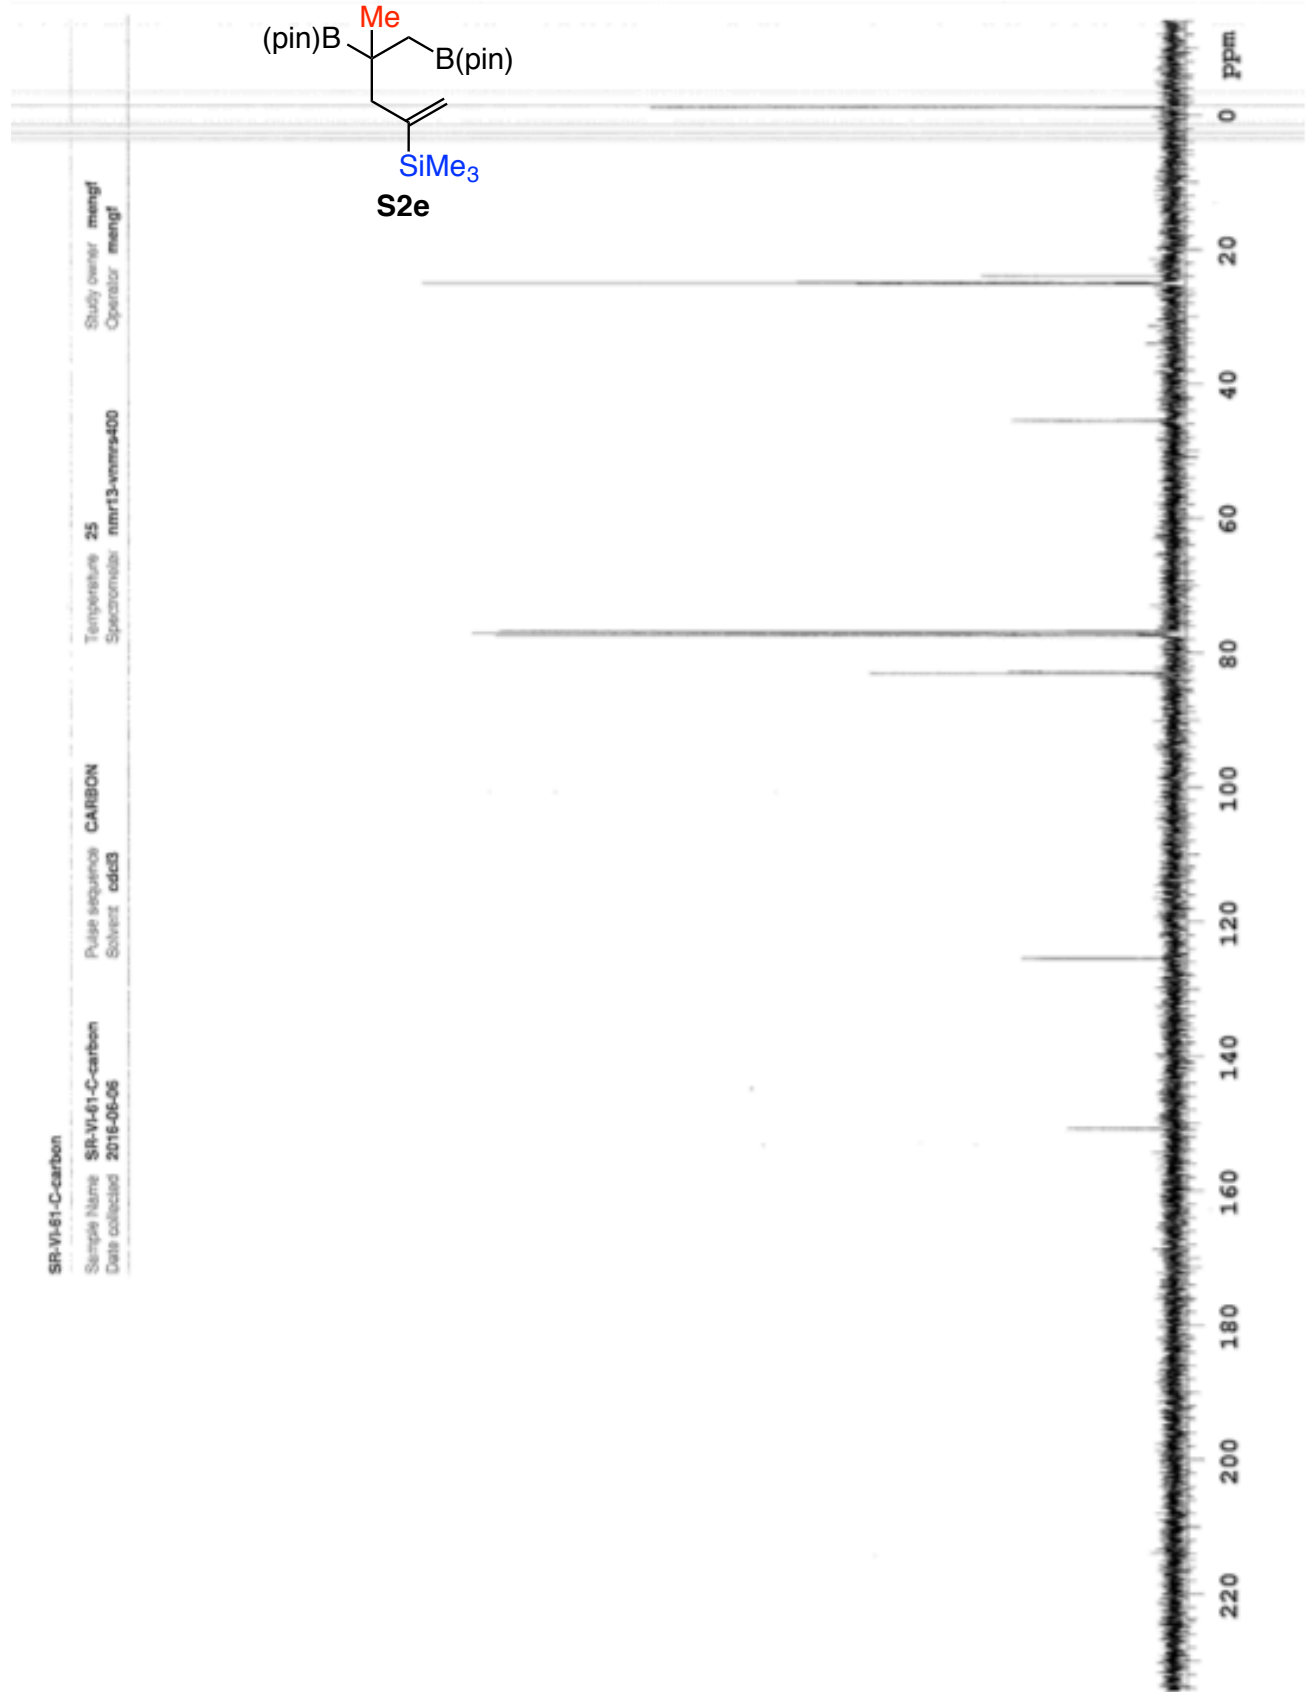

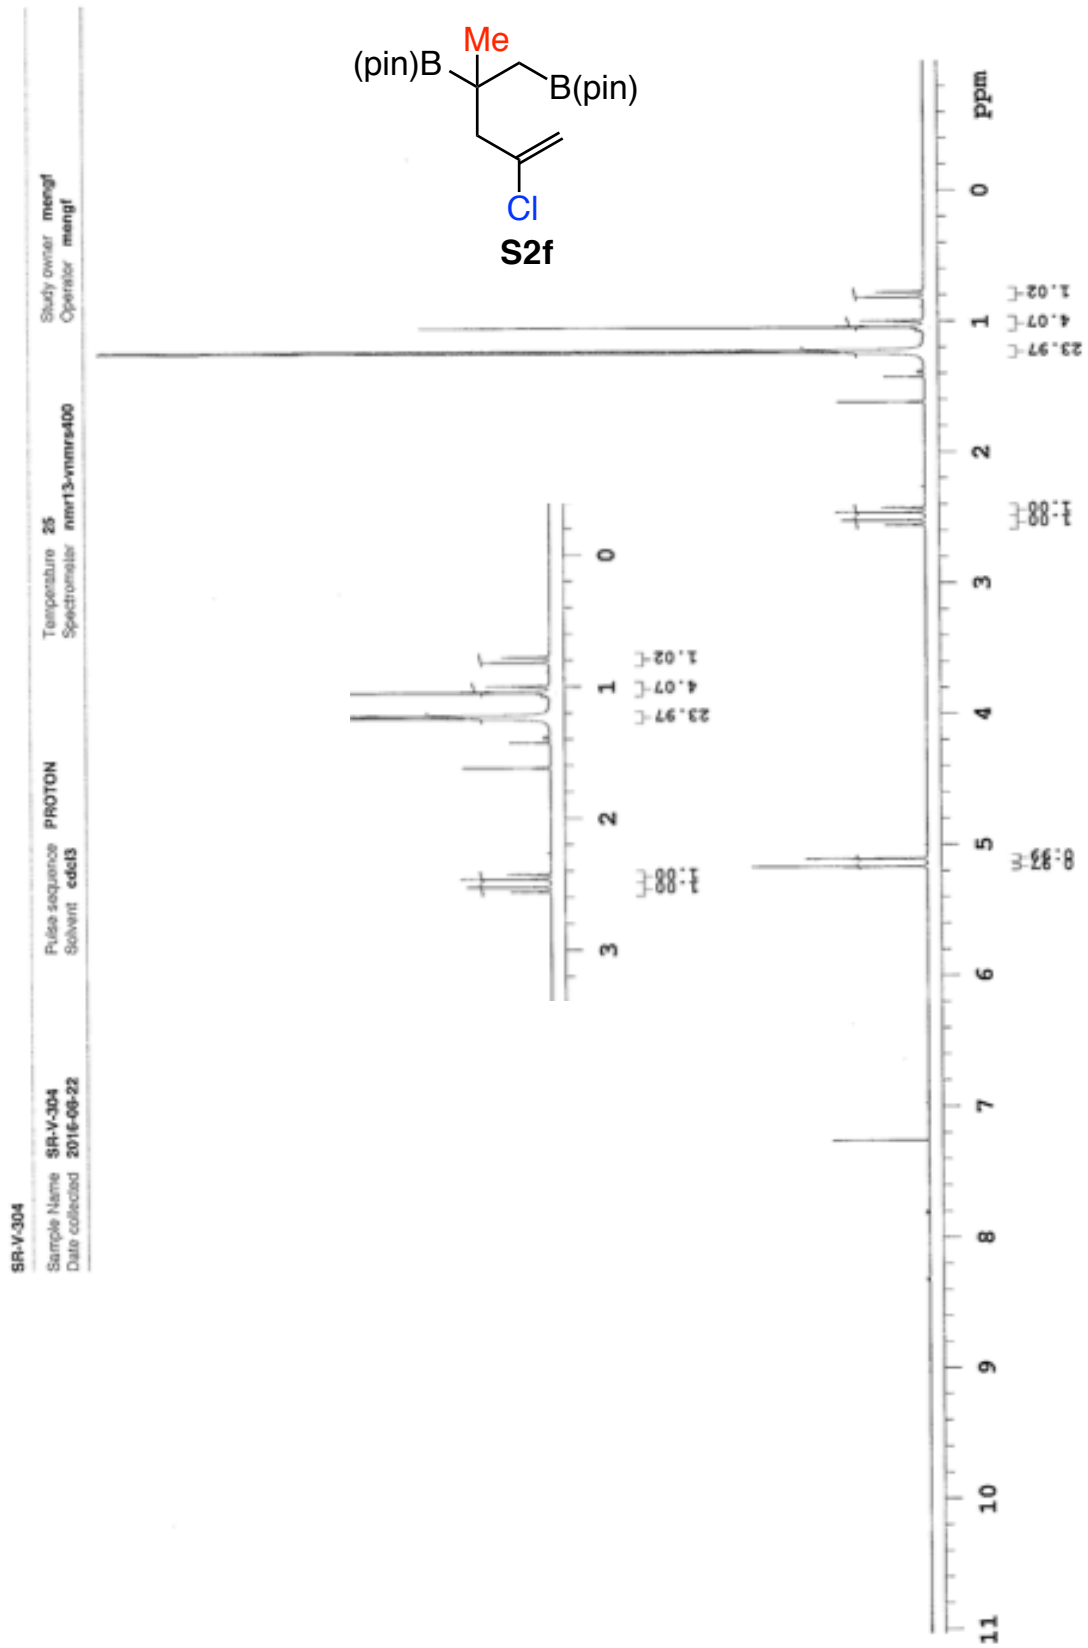



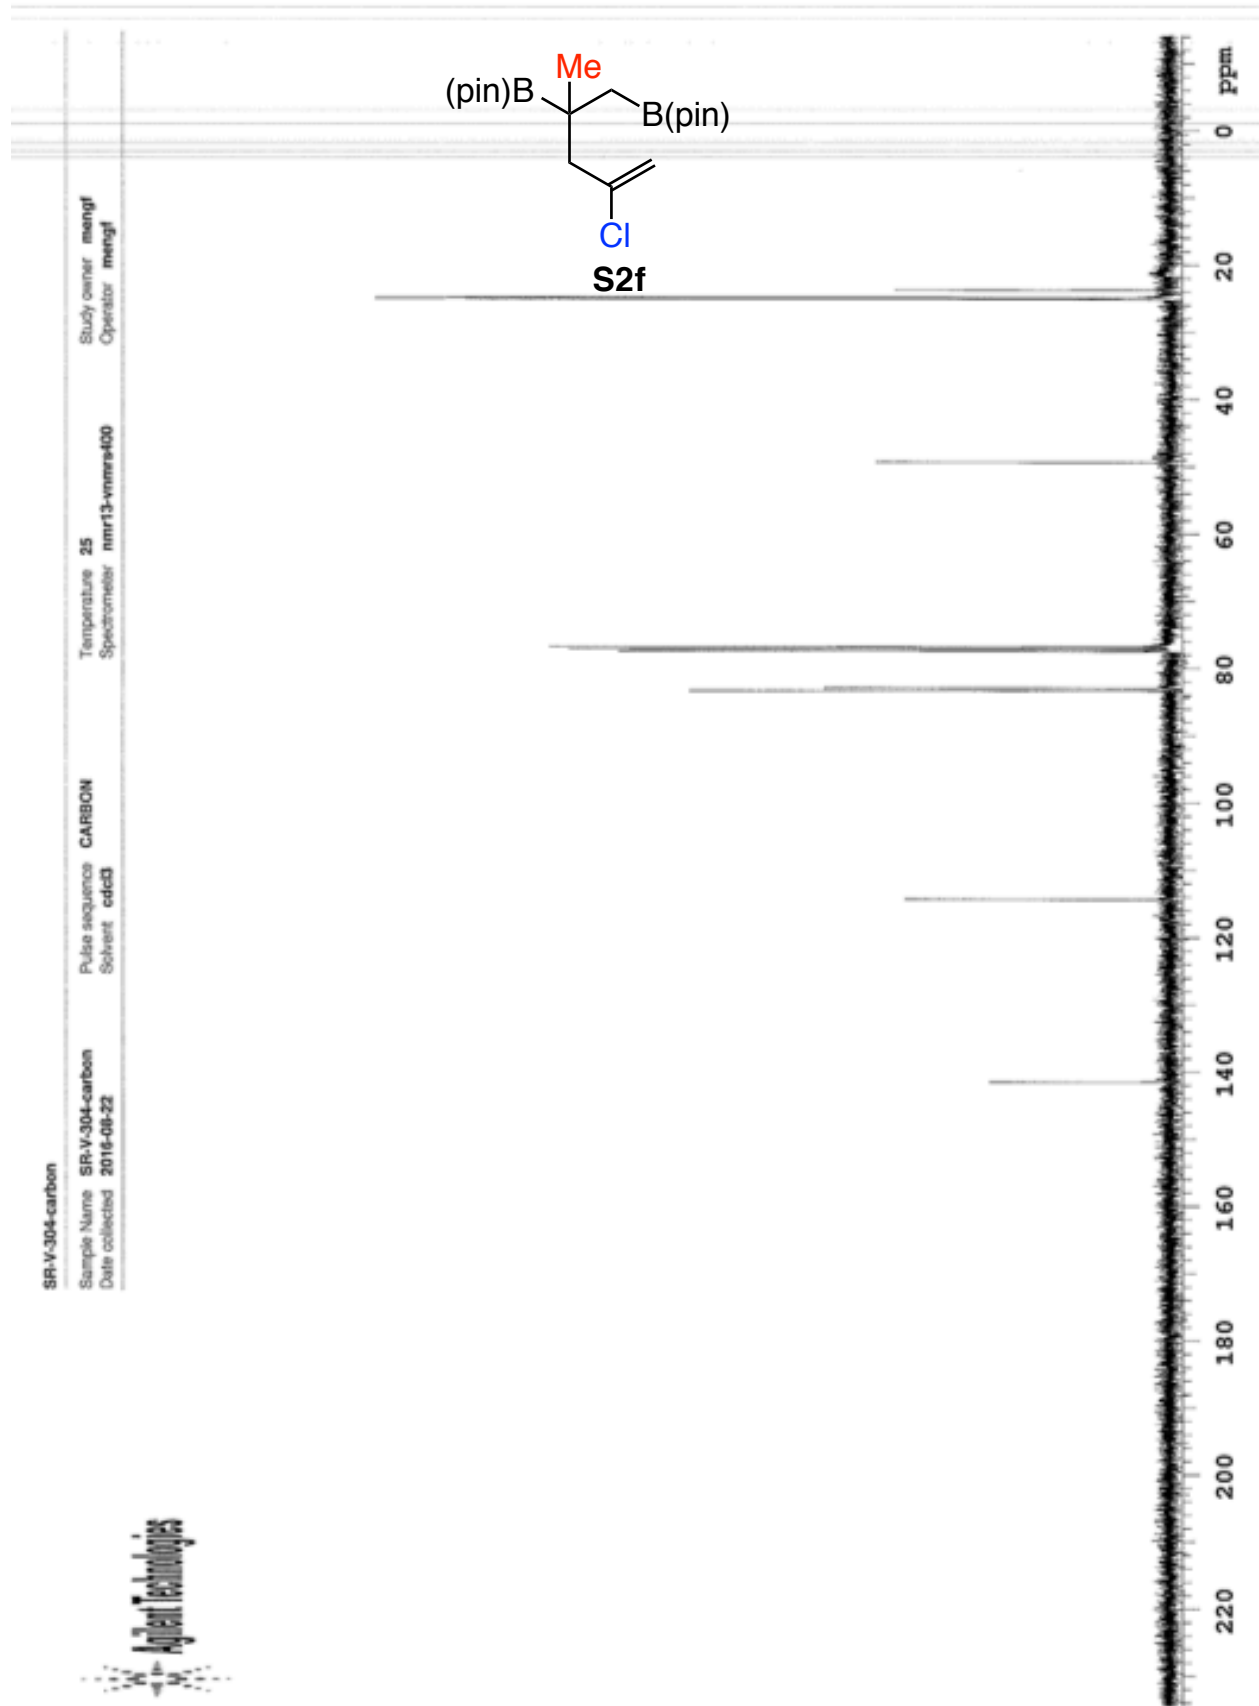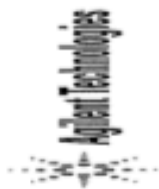



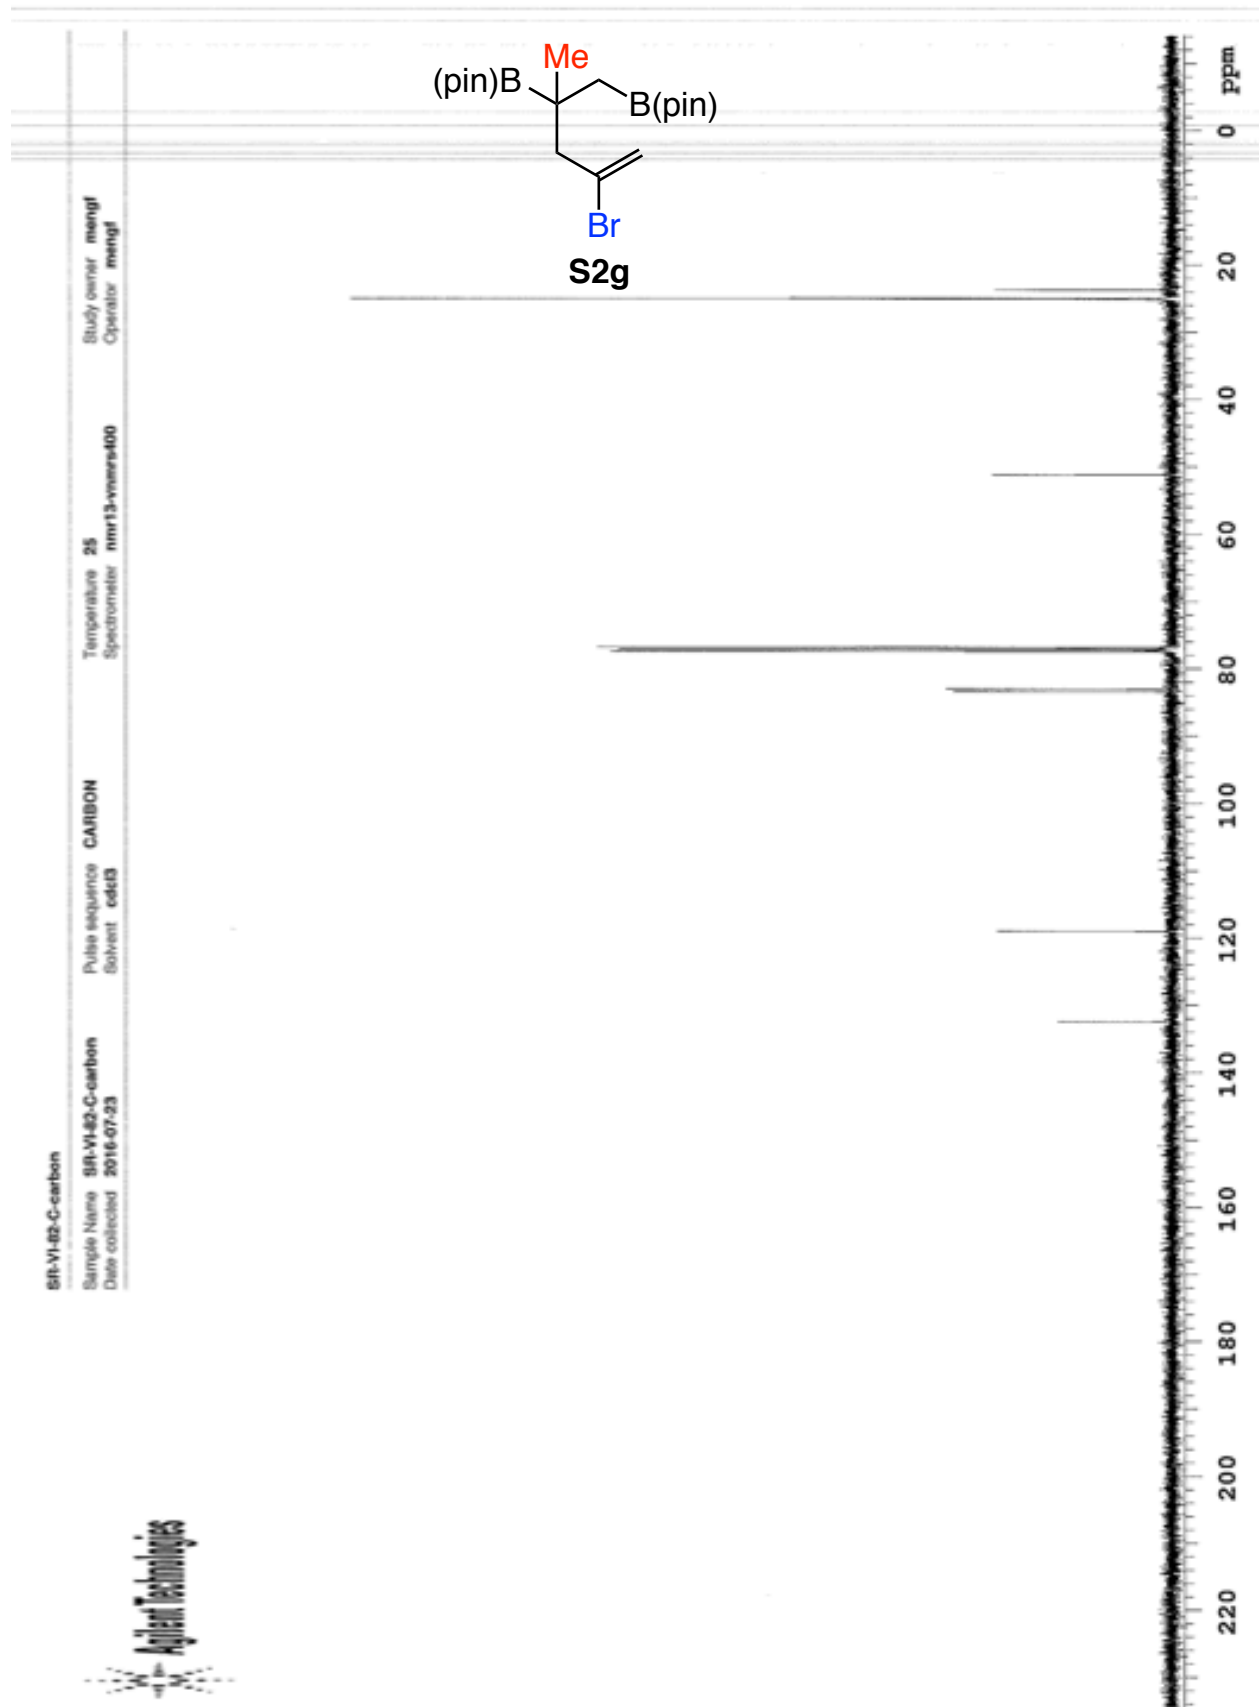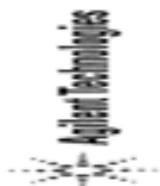

Supplement: NIHMS975033-supplement-SI.pdf [file NIHMS975033-supplement-SI.pdf]
